# Supplementary material for: A non-invasive strategy for suppressing asthmatic airway inflammation and remodeling: Inhalation of nebulized hypoxic hUCMSC-derived extracellular vesicles
Source: Front Immunol. 2023 Apr 5;14:1150971. doi: 10.3389/fimmu.2023.1150971 (PMC10113478; doi:10.3389/fimmu.2023.1150971)
Supplement: Additional file 1 — The DE mRNAs in lungs between EVs-INH-treated mice and OVA-induced asthma mice (|log FC| > 1 and adjusted P-value < 0.05). [file Table_1.xlsx]

## Sheet: Sheet1
gene_id	gene_name	EntrezID	transcript_id	GO	KEGG	KO_ENTRY	EC	Description	trans_type	Reactome	FPKM.Hypo_EV	FPKM.OVA	fc	log2(fc)	pval	qval	regulation	significant
ENSMUSG00000076571	Igkv5-37	110701	ENSMUST00000103372	GO:0002377(immunoglobulin production);GO:0005615(extracellular space);GO:0006955(immune response)	NA	NA	NA	immunoglobulin kappa variable 5-37 [Source:MGI Symbol;Acc:MGI:2686256]	IG_V_gene	NA	4.29128	461.417	0.00930023	-6.74852	3.76678e-131	5.97524e-127	down	yes
ENSMUSG00000095700	Ighv10-3	36452	ENSMUST00000103495	GO:0003823(antigen binding);GO:0006910(phagocytosis, recognition);GO:0006911(phagocytosis, engulfment);GO:0006958(complement activation, classical pathway);GO:0009897(external side of plasma membrane);GO:0034987(immunoglobulin receptor binding);GO:0042571(immunoglobulin complex, circulating);GO:0042742(defense response to bacterium);GO:0045087(innate immune response);GO:0050853(B cell receptor si…	NA	NA	NA	immunoglobulin heavy variable V10-3 [Source:MGI Symbol;Acc:MGI:3648785]	IG_V_gene	NA	3.39541	229.755	0.0147784	-6.08036	4.74843e-109	3.76622e-105	down	yes
ENSMUSG00000063415	Cyp26b1	111482;111483	ENSMUST00000205228;ENSMUST00000204146	GO:0001709(cell fate determination);GO:0001768(establishment of T cell polarity);GO:0001822(kidney development);GO:0001972(retinoic acid binding);GO:0004497(monooxygenase activity);GO:0005506(iron ion binding);GO:0005737(cytoplasm);GO:0005783(endoplasmic reticulum);GO:0005789(endoplasmic reticulum membrane);GO:0006805(xenobiotic metabolic process);GO:0006954(inflammatory response);GO:0007140(male…	00830(Retinol metabolism);00830(Retinol metabolism)	K12664	NA	cytochrome P450, family 26, subfamily b, polypeptide 1 [Source:MGI Symbol;Acc:MGI:2176159]	protein_coding	R_MMU_211897(Cytochrome_P450_arranged_by_substrate_type);R_MMU_1430728(Metabolism);R_MMU_211945(Phase_I_Functionalization_of_compounds);R_MMU_9006931(Signaling_by_Nuclear_Receptors);R_MMU_211916(Vitamins);R_MMU_211859(Biological_oxidations);R_MMU_162582(Signal_Transduction);R_MMU_5365859(RA_biosynthesis_pathway);R_MMU_5362517(Signaling_by_Retinoic_Acid)	0.368249	10.1227	0.0363783	-4.78078	5.20957e-78	2.06599e-74	down	yes
ENSMUSG00000094930	Igkv6-25	110724	ENSMUST00000103383	GO:0002377(immunoglobulin production);GO:0005615(extracellular space);GO:0006955(immune response)	NA	NA	NA	immunoglobulin kappa chain variable 6-25 [Source:MGI Symbol;Acc:MGI:4439867]	IG_V_gene	NA	23.7105	608.988	0.0389342	-4.68282	2.02495e-84	1.07073e-80	down	yes
ENSMUSG00000096498	Ighv2-5	36359;36358	ENSMUST00000195707;ENSMUST00000103449	GO:0003823(antigen binding);GO:0006910(phagocytosis, recognition);GO:0006911(phagocytosis, engulfment);GO:0006958(complement activation, classical pathway);GO:0009897(external side of plasma membrane);GO:0034987(immunoglobulin receptor binding);GO:0042571(immunoglobulin complex, circulating);GO:0042742(defense response to bacterium);GO:0045087(innate immune response);GO:0050853(B cell receptor si…	NA	NA	NA	immunoglobulin heavy variable 2-5 [Source:MGI Symbol;Acc:MGI:4439517]	IG_V_gene	NA	4.66906	89.918	0.0519258	-4.26741	1.05857e-65	2.79869e-62	down	yes
ENSMUSG00000076652	Ighv7-3	36409	ENSMUST00000103461	GO:0003823(antigen binding);GO:0006910(phagocytosis, recognition);GO:0006911(phagocytosis, engulfment);GO:0006958(complement activation, classical pathway);GO:0009897(external side of plasma membrane);GO:0034987(immunoglobulin receptor binding);GO:0042571(immunoglobulin complex, circulating);GO:0042742(defense response to bacterium);GO:0045087(innate immune response);GO:0050853(B cell receptor si…	NA	NA	NA	immunoglobulin heavy variable 7-3 [Source:MGI Symbol;Acc:MGI:4439766]	IG_V_gene	NA	15.5858	270.479	0.0576228	-4.11722	1.80487e-67	5.72615e-64	down	yes
ENSMUSG00000050276	Mrgprg	127886;127885	ENSMUST00000208986;ENSMUST00000058092	GO:0004930(G protein-coupled receptor activity);GO:0005886(plasma membrane);GO:0007165(signal transduction);GO:0007186(G protein-coupled receptor signaling pathway);GO:0016020(membrane);GO:0016021(integral component of membrane);GO:0016021(integral component of membrane)	NA	K08395	NA	MAS-related GPR, member G [Source:MGI Symbol;Acc:MGI:3033145]	protein_coding	NA	0.41354	6.48089	0.0638092	-3.97009	3.00579e-47	2.50952e-44	down	yes
ENSMUSG00000031972	Acta1	134267;134268	ENSMUST00000034453;ENSMUST00000212584	GO:0000166(nucleotide binding);GO:0001725(stress fiber);GO:0005515(protein binding);GO:0005524(ATP binding);GO:0005737(cytoplasm);GO:0005856(cytoskeleton);GO:0005865(striated muscle thin filament);GO:0005869(dynactin complex);GO:0005884(actin filament);GO:0009612(response to mechanical stimulus);GO:0009991(response to extracellular stimulus);GO:0010226(response to lithium ion);GO:0010628(positive…	NA	K10354	NA	actin, alpha 1, skeletal muscle [Source:MGI Symbol;Acc:MGI:87902]	protein_coding	R_MMU_390522(Striated_Muscle_Contraction);R_MMU_397014(Muscle_contraction)	0.938478	12.8655	0.0729455	-3.77704	1.18223e-49	1.56281e-46	down	yes
ENSMUSG00000102440	Pcdhga9	66513;66514	ENSMUST00000091935;ENSMUST00000194814	GO:0005509(calcium ion binding);GO:0005886(plasma membrane);GO:0005887(integral component of plasma membrane);GO:0007155(cell adhesion);GO:0007156(homophilic cell adhesion via plasma membrane adhesion molecules);GO:0016020(membrane);GO:0016021(integral component of membrane);GO:0046872(metal ion binding);GO:0046872(metal ion binding)	NA	K16495	NA	protocadherin gamma subfamily A, 9 [Source:MGI Symbol;Acc:MGI:1935226]	protein_coding;retained_intron	NA	0.149653	1.95944	0.0763754	-3.71075	5.37341e-42	3.15698e-39	down	yes
ENSMUSG00000096410	Ighv1-19	36477;36476	ENSMUST00000193855;ENSMUST00000103505	GO:0003823(antigen binding);GO:0006910(phagocytosis, recognition);GO:0006911(phagocytosis, engulfment);GO:0006958(complement activation, classical pathway);GO:0009897(external side of plasma membrane);GO:0034987(immunoglobulin receptor binding);GO:0042571(immunoglobulin complex, circulating);GO:0042742(defense response to bacterium);GO:0045087(innate immune response);GO:0050853(B cell receptor si…	NA	NA	NA	immunoglobulin heavy variable V1-19 [Source:MGI Symbol;Acc:MGI:4439779]	IG_V_gene	R_MMU_2871809(FCERI_mediated_Ca+2_mobilization);R_MMU_977606(Regulation_of_Complement_cascade);R_MMU_5653656(Vesicle_mediated_transport);R_MMU_2029481(FCGR_activation);R_MMU_2029480(Fcgamma_receptor_(FCGR)_dependent_phagocytosis);R_MMU_983705(Signaling_by_the_B_Cell_Receptor_(BCR));R_MMU_109582(Hemostasis);R_MMU_173623(Classical_antibody_mediated_complement_activation);R_MMU_166663(Initial_trigge…	3.67977	46.9748	0.078335	-3.6742	2.55744e-47	2.38639e-44	down	yes
ENSMUSG00000056328	Myh1	25684;25685;25683	ENSMUST00000018637;ENSMUST00000129018;ENSMUST00000124516	GO:0000166(nucleotide binding);GO:0003774(motor activity);GO:0003779(actin binding);GO:0005515(protein binding);GO:0005516(calmodulin binding);GO:0005524(ATP binding);GO:0005737(cytoplasm);GO:0005859(muscle myosin complex);GO:0006936(muscle contraction);GO:0014704(intercalated disc);GO:0016459(myosin complex);GO:0030016(myofibril);GO:0031672(A band);GO:0032982(myosin filament);GO:0036464(cytoplas…	04530(Tight junction);04530(Tight junction)	K10352	NA	myosin, heavy polypeptide 1, skeletal muscle, adult [Source:MGI Symbol;Acc:MGI:1339711]	protein_coding	NA	0.205147	2.54274	0.0806795	-3.63165	5.58937e-45	4.22211e-42	down	yes
ENSMUSG00000103271	Ighv4-2	36396	ENSMUST00000192975	NA	NA	NA	NA	immunoglobulin heavy variable V4-2 [Source:MGI Symbol;Acc:MGI:5009840]	IG_V_pseudogene	NA	7.31697	85.3298	0.0857492	-3.54373	9.26586e-49	9.79895e-46	down	yes
ENSMUSG00000002565	Scin	32740;32739	ENSMUST00000002640;ENSMUST00000078481	GO:0002102(podosome);GO:0003779(actin binding);GO:0005509(calcium ion binding);GO:0005546(phosphatidylinositol-4,5-bisphosphate binding);GO:0005737(cytoplasm);GO:0005856(cytoskeleton);GO:0005886(plasma membrane);GO:0005903(brush border);GO:0007417(central nervous system development);GO:0008154(actin polymerization or depolymerization);GO:0008285(negative regulation of cell population proliferatio…	04666(Fc gamma R-mediated phagocytosis);04810(Regulation of actin cytoskeleton);05203(Viral carcinogenesis);05203(Viral carcinogenesis)	K05768	NA	scinderin [Source:MGI Symbol;Acc:MGI:1306794]	protein_coding	NA	0.92931	10.7961	0.0860784	-3.5382	3.72771e-49	4.54867e-46	down	yes
ENSMUSG00000076655	Ighv4-1	36391	ENSMUST00000103464	GO:0003823(antigen binding);GO:0006910(phagocytosis, recognition);GO:0006911(phagocytosis, engulfment);GO:0006958(complement activation, classical pathway);GO:0009897(external side of plasma membrane);GO:0034987(immunoglobulin receptor binding);GO:0042571(immunoglobulin complex, circulating);GO:0042742(defense response to bacterium);GO:0045087(innate immune response);GO:0050853(B cell receptor si…	NA	NA	NA	immunoglobulin heavy variable 4-1 [Source:MGI Symbol;Acc:MGI:4439536]	IG_V_gene	R_MMU_2871809(FCERI_mediated_Ca+2_mobilization);R_MMU_977606(Regulation_of_Complement_cascade);R_MMU_5653656(Vesicle_mediated_transport);R_MMU_2029481(FCGR_activation);R_MMU_2029480(Fcgamma_receptor_(FCGR)_dependent_phagocytosis);R_MMU_983705(Signaling_by_the_B_Cell_Receptor_(BCR));R_MMU_109582(Hemostasis);R_MMU_173623(Classical_antibody_mediated_complement_activation);R_MMU_166663(Initial_trigge…	8.18815	88.4239	0.092601	-3.43283	1.15422e-47	1.14434e-44	down	yes
ENSMUSG00000019987	Arg1	16890;16891;16892	ENSMUST00000020161;ENSMUST00000218260;ENSMUST00000220186	GO:0000050(urea cycle);GO:0001889(liver development);GO:0001938(positive regulation of endothelial cell proliferation);GO:0002250(adaptive immune response);GO:0002376(immune system process);GO:0004053(arginase activity);GO:0005615(extracellular space);GO:0005737(cytoplasm);GO:0005741(mitochondrial outer membrane);GO:0005829(cytosol);GO:0006525(arginine metabolic process);GO:0007565(female pregnan…	00220(Arginine biosynthesis);00330(Arginine and proline metabolism);05146(Amoebiasis);05146(Amoebiasis)	K01476	EC:3.5.3.1	arginase, liver [Source:MGI Symbol;Acc:MGI:88070]	protein_coding;retained_intron	R_MMU_1430728(Metabolism);R_MMU_70635(Urea_cycle);R_MMU_168256(Immune_System);R_MMU_6798695(Neutrophil_degranulation);R_MMU_168249(Innate_Immune_System);R_MMU_71291(Metabolism_of_amino_acids_and_derivatives)	4.38421	46.9063	0.0934673	-3.41939	3.20693e-51	6.35893e-48	down	yes
ENSMUSG00000102315	Ighv1-28	36489	ENSMUST00000192987	NA	NA	NA	NA	immunoglobulin heavy variable 1-28 [Source:MGI Symbol;Acc:MGI:3644938]	IG_V_pseudogene	NA	3.35314	35.5271	0.0943826	-3.40533	7.60987e-39	3.44901e-36	down	yes
ENSMUSG00000096670	Ighv2-6	36362	ENSMUST00000179657	GO:0003823(antigen binding);GO:0006910(phagocytosis, recognition);GO:0006911(phagocytosis, engulfment);GO:0006958(complement activation, classical pathway);GO:0009897(external side of plasma membrane);GO:0034987(immunoglobulin receptor binding);GO:0042571(immunoglobulin complex, circulating);GO:0042742(defense response to bacterium);GO:0045087(innate immune response);GO:0050853(B cell receptor si…	NA	NA	NA	immunoglobulin heavy variable 2-6 [Source:MGI Symbol;Acc:MGI:4439518]	IG_V_gene	NA	33.9483	352.936	0.0961883	-3.378	1.16096e-50	2.04625e-47	down	yes
ENSMUSG00000040809	Chil3	88639;88640;88641	ENSMUST00000063062;ENSMUST00000149836;ENSMUST00000129563	GO:0000272(polysaccharide catabolic process);GO:0004563(beta-N-acetylhexosaminidase activity);GO:0005576(extracellular region);GO:0005634(nucleus);GO:0005635(nuclear envelope);GO:0005737(cytoplasm);GO:0005783(endoplasmic reticulum);GO:0005975(carbohydrate metabolic process);GO:0006032(chitin catabolic process);GO:0006954(inflammatory response);GO:0008061(chitin binding);GO:0008152(metabolic proce…	NA	K17524	NA	chitinase-like 3 [Source:MGI Symbol;Acc:MGI:1330860]	protein_coding;retained_intron	NA	232.871	2361.9	0.0985946	-3.34235	8.60187e-52	1.94931e-48	down	yes
ENSMUSG00000055415	Atp10b	24044	ENSMUST00000238415	GO:0000166(nucleotide binding);GO:0000287(magnesium ion binding);GO:0005524(ATP binding);GO:0005783(endoplasmic reticulum);GO:0005886(plasma membrane);GO:0015914(phospholipid transport);GO:0016020(membrane);GO:0016021(integral component of membrane);GO:0045332(phospholipid translocation);GO:0046872(metal ion binding);GO:0140326(ATPase-coupled intramembrane lipid transporter activity)	NA	K01530	EC:7.6.2.1	ATPase, class V, type 10B [Source:MGI Symbol;Acc:MGI:2442688]	protein_coding	R_MMU_936837(Ion_transport_by_P_type_ATPases);R_MMU_382551(Transport_of_small_molecules);R_MMU_983712(Ion_channel_transport)	0.087305	0.848139	0.102937	-3.28017	5.28247e-33	1.78289e-30	down	yes
ENSMUSG00000038209	Itln1	14667	ENSMUST00000043094	GO:0001934(positive regulation of protein phosphorylation);GO:0005509(calcium ion binding);GO:0005576(extracellular region);GO:0005886(plasma membrane);GO:0009624(response to nematode);GO:0016020(membrane);GO:0030246(carbohydrate binding);GO:0031225(anchored component of membrane);GO:0031526(brush border membrane);GO:0042802(identical protein binding);GO:0043235(receptor complex);GO:0045121(membr…	NA	K17527	NA	intelectin 1 (galactofuranose binding) [Source:MGI Symbol;Acc:MGI:1333831]	protein_coding	R_MMU_6803157(Antimicrobial_peptides);R_MMU_168256(Immune_System);R_MMU_168249(Innate_Immune_System)	2.54473	23.7737	0.10704	-3.22378	5.95212e-42	3.37209e-39	down	yes
ENSMUSG00000037106	Fer1l6	49715;49712	ENSMUST00000159177;ENSMUST00000161028	GO:0003674(molecular_function);GO:0005575(cellular_component);GO:0007009(plasma membrane organization);GO:0009617(response to bacterium);GO:0016020(membrane);GO:0016021(integral component of membrane);GO:0046872(metal ion binding);GO:0046872(metal ion binding)	NA	K22127	NA	fer-1-like 6 (C. elegans) [Source:MGI Symbol;Acc:MGI:3645398]	retained_intron;protein_coding	NA	0.67384	5.98604	0.112569	-3.15112	5.16789e-43	3.56427e-40	down	yes
ENSMUSG00000076591	Igkv8-16	110740;110739	ENSMUST00000195945;ENSMUST00000103392	GO:0002377(immunoglobulin production);GO:0005615(extracellular space);GO:0006955(immune response);GO:0006955(immune response)	NA	NA	NA	immunoglobulin kappa variable 8-16 [Source:MGI Symbol;Acc:MGI:1330843]	IG_V_gene	NA	3.55757	30.8053	0.115485	-3.11422	4.81473e-34	1.77619e-31	down	yes
ENSMUSG00000106599	Ighv1-73	36586	ENSMUST00000197435	NA	NA	NA	NA	immunoglobulin heavy variable 1-73 [Source:MGI Symbol;Acc:MGI:3645131]	IG_V_pseudogene	NA	5.14568	43.4202	0.118509	-3.07693	1.36182e-35	5.83853e-33	down	yes
ENSMUSG00000095612	Ighv5-4	36345	ENSMUST00000103444	GO:0003823(antigen binding);GO:0006910(phagocytosis, recognition);GO:0006911(phagocytosis, engulfment);GO:0006958(complement activation, classical pathway);GO:0009897(external side of plasma membrane);GO:0034987(immunoglobulin receptor binding);GO:0042571(immunoglobulin complex, circulating);GO:0042742(defense response to bacterium);GO:0045087(innate immune response);GO:0050853(B cell receptor si…	NA	NA	NA	immunoglobulin heavy variable 5-4 [Source:MGI Symbol;Acc:MGI:4439895]	IG_V_gene	R_MMU_2871809(FCERI_mediated_Ca+2_mobilization);R_MMU_977606(Regulation_of_Complement_cascade);R_MMU_5653656(Vesicle_mediated_transport);R_MMU_2029481(FCGR_activation);R_MMU_2029480(Fcgamma_receptor_(FCGR)_dependent_phagocytosis);R_MMU_983705(Signaling_by_the_B_Cell_Receptor_(BCR));R_MMU_109582(Hemostasis);R_MMU_173623(Classical_antibody_mediated_complement_activation);R_MMU_166663(Initial_trigge…	14.4021	117.847	0.12221	-3.03256	8.75999e-41	4.2109e-38	down	yes
ENSMUSG00000074445	Sprr2a3	87313;87312	ENSMUST00000090872;ENSMUST00000193337	GO:0001533(cornified envelope);GO:0005200(structural constituent of cytoskeleton);GO:0005634(nucleus);GO:0005737(cytoplasm);GO:0007010(cytoskeleton organization);GO:0008360(regulation of cell shape);GO:0008544(epidermis development);GO:0030216(keratinocyte differentiation);GO:0031424(keratinization);GO:0032355(response to estradiol);GO:0032355(response to estradiol)	NA	NA	NA	small proline-rich protein 2A3 [Source:MGI Symbol;Acc:MGI:3845028]	protein_coding	NA	2.6029	21.1196	0.123246	-3.02039	4.06583e-41	2.22401e-38	down	yes
ENSMUSG00000031981	Capn9	134308;134309	ENSMUST00000093033;ENSMUST00000133086	GO:0004198(calcium-dependent cysteine-type endopeptidase activity);GO:0005509(calcium ion binding);GO:0005737(cytoplasm);GO:0006508(proteolysis);GO:0016787(hydrolase activity);GO:0045214(sarcomere organization);GO:0046872(metal ion binding);GO:0046872(metal ion binding)	NA	K08578	EC:3.4.22.-	calpain 9 [Source:MGI Symbol;Acc:MGI:1920897]	protein_coding	R_MMU_1474244(Extracellular_matrix_organization);R_MMU_1474228(Degradation_of_the_extracellular_matrix)	0.810127	6.554	0.123608	-3.01616	8.66705e-35	3.43713e-32	down	yes
ENSMUSG00000030730	Atp2a1	125806;125807	ENSMUST00000032974;ENSMUST00000146973	GO:0000166(nucleotide binding);GO:0005338(nucleotide-sugar transmembrane transporter activity);GO:0005388(calcium transmembrane transporter activity, phosphorylative mechanism);GO:0005509(calcium ion binding);GO:0005515(protein binding);GO:0005524(ATP binding);GO:0005739(mitochondrion);GO:0005783(endoplasmic reticulum);GO:0005789(endoplasmic reticulum membrane);GO:0005793(endoplasmic reticulum-Go…	04020(Calcium signaling pathway);04022(cGMP-PKG signaling pathway);04972(Pancreatic secretion);05010(Alzheimer disease);05010(Alzheimer disease)	K05853	EC:7.2.2.10	ATPase, Ca++ transporting, cardiac muscle, fast twitch 1 [Source:MGI Symbol;Acc:MGI:105058]	protein_coding	R_MMU_418346(Platelet_homeostasis);R_MMU_936837(Ion_transport_by_P_type_ATPases);R_MMU_109582(Hemostasis);R_MMU_382551(Transport_of_small_molecules);R_MMU_418360(Platelet_calcium_homeostasis);R_MMU_5576891(Cardiac_conduction);R_MMU_5578775(Ion_homeostasis);R_MMU_397014(Muscle_contraction);R_MMU_983712(Ion_channel_transport);R_MMU_418359(Reduction_of_cytosolic_Ca++_levels)	0.329644	2.6036	0.126611	-2.98152	6.0283e-30	1.56765e-27	down	yes
ENSMUSG00000028255	Clca1	90359;90360	ENSMUST00000029919;ENSMUST00000195901	GO:0005229(intracellular calcium activated chloride channel activity);GO:0005254(chloride channel activity);GO:0005576(extracellular region);GO:0005615(extracellular space);GO:0005887(integral component of plasma membrane);GO:0005902(microvillus);GO:0006508(proteolysis);GO:0006811(ion transport);GO:0006816(calcium ion transport);GO:0006821(chloride transport);GO:0008233(peptidase activity);GO:000…	04924(Renin secretion);04972(Pancreatic secretion);04972(Pancreatic secretion)	K05027	NA	chloride channel accessory 1 [Source:MGI Symbol;Acc:MGI:1346342]	protein_coding;processed_transcript	R_MMU_382551(Transport_of_small_molecules);R_MMU_2672351(Stimuli_sensing_channels);R_MMU_983712(Ion_channel_transport)	122.219	962.859	0.126933	-2.97786	6.10788e-43	4.03706e-40	down	yes
ENSMUSG00000104452	Ighv8-8	36539	ENSMUST00000192591	GO:0003823(antigen binding);GO:0006910(phagocytosis, recognition);GO:0006911(phagocytosis, engulfment);GO:0006958(complement activation, classical pathway);GO:0009897(external side of plasma membrane);GO:0034987(immunoglobulin receptor binding);GO:0042571(immunoglobulin complex, circulating);GO:0042742(defense response to bacterium);GO:0045087(innate immune response);GO:0050853(B cell receptor si…	NA	NA	NA	immunoglobulin heavy variable 8-8 [Source:MGI Symbol;Acc:MGI:3815333]	IG_V_gene	R_MMU_2871809(FCERI_mediated_Ca+2_mobilization);R_MMU_977606(Regulation_of_Complement_cascade);R_MMU_5653656(Vesicle_mediated_transport);R_MMU_2029481(FCGR_activation);R_MMU_2029480(Fcgamma_receptor_(FCGR)_dependent_phagocytosis);R_MMU_983705(Signaling_by_the_B_Cell_Receptor_(BCR));R_MMU_109582(Hemostasis);R_MMU_173623(Classical_antibody_mediated_complement_activation);R_MMU_166663(Initial_trigge…	39.6783	303.158	0.130883	-2.93365	5.62845e-41	2.84534e-38	down	yes
ENSMUSG00000029155	Spata18	101958;101961;101959;101960	ENSMUST00000071077;ENSMUST00000178631;ENSMUST00000041422;ENSMUST00000113548	GO:0005737(cytoplasm);GO:0005739(mitochondrion);GO:0005741(mitochondrial outer membrane);GO:0006974(cellular response to DNA damage stimulus);GO:0007275(multicellular organism development);GO:0007283(spermatogenesis);GO:0016020(membrane);GO:0030154(cell differentiation);GO:0035694(mitochondrial protein catabolic process);GO:0035695(mitophagy by induced vacuole formation);GO:0036126(sperm flagellu…	NA	K22257	NA	spermatogenesis associated 18 [Source:MGI Symbol;Acc:MGI:1920722]	protein_coding;non_stop_decay	NA	1.15301	8.59993	0.134072	-2.89892	1.0591e-33	3.81831e-31	down	yes
ENSMUSG00000033717	Adra2a	72631;72632	ENSMUST00000036700;ENSMUST00000237285	GO:0001819(positive regulation of cytokine production);GO:0002526(acute inflammatory response);GO:0004930(G protein-coupled receptor activity);GO:0004935(adrenergic receptor activity);GO:0004938(alpha2-adrenergic receptor activity);GO:0005515(protein binding);GO:0005737(cytoplasm);GO:0005886(plasma membrane);GO:0005887(integral component of plasma membrane);GO:0006260(DNA replication);GO:0006940(…	04022(cGMP-PKG signaling pathway);04080(Neuroactive ligand-receptor interaction);04080(Neuroactive ligand-receptor interaction)	K04138	NA	adrenergic receptor, alpha 2a [Source:MGI Symbol;Acc:MGI:87934]	protein_coding	R_MMU_373076(Class_A/1_(Rhodopsin_like_receptors));R_MMU_163685(Integration_of_energy_metabolism);R_MMU_76009(Platelet_Aggregation_(Plug_Formation));R_MMU_109582(Hemostasis);R_MMU_1430728(Metabolism);R_MMU_5683826(Surfactant_metabolism);R_MMU_375280(Amine_ligand_binding_receptors);R_MMU_392023(Adrenaline_signalling_through_Alpha_2_adrenergic_receptor);R_MMU_500792(GPCR_ligand_binding);R_MMU_76002…	0.961991	6.78843	0.14171	-2.81898	4.18056e-35	1.70042e-32	down	yes
ENSMUSG00000050370	Ch25h	71456	ENSMUST00000050562	GO:0000254(C-4 methylsterol oxidase activity);GO:0001567(cholesterol 25-hydroxylase activity);GO:0004497(monooxygenase activity);GO:0005506(iron ion binding);GO:0005783(endoplasmic reticulum);GO:0005789(endoplasmic reticulum membrane);GO:0006629(lipid metabolic process);GO:0006694(steroid biosynthetic process);GO:0008202(steroid metabolic process);GO:0008203(cholesterol metabolic process);GO:0008…	00120(Primary bile acid biosynthesis)	K10223	EC:1.14.99.38	cholesterol 25-hydroxylase [Source:MGI Symbol;Acc:MGI:1333869]	protein_coding	R_MMU_556833(Metabolism_of_lipids);R_MMU_1430728(Metabolism);R_MMU_8957322(Metabolism_of_steroids);R_MMU_194068(Bile_acid_and_bile_salt_metabolism);R_MMU_192105(Synthesis_of_bile_acids_and_bile_salts)	2.50013	16.7525	0.149239	-2.7443	2.404e-32	7.94471e-30	down	yes
ENSMUSG00000042351	Grap2	51308;51305;51304;51306;51307	ENSMUST00000230910;ENSMUST00000230856;ENSMUST00000229980;ENSMUST00000043149;ENSMUST00000230573	GO:0005515(protein binding);GO:0005634(nucleus);GO:0005654(nucleoplasm);GO:0005737(cytoplasm);GO:0005768(endosome);GO:0005829(cytosol);GO:0005886(plasma membrane);GO:0005886(plasma membrane)	04660(T cell receptor signaling pathway);04660(T cell receptor signaling pathway)	K07366	NA	GRB2-related adaptor protein 2 [Source:MGI Symbol;Acc:MGI:1333842]	processed_transcript;nonsense_mediated_decay;protein_coding	R_MMU_2871809(FCERI_mediated_Ca+2_mobilization);R_MMU_2424491(DAP12_signaling);R_MMU_389356(CD28_co_stimulation);R_MMU_202433(Generation_of_second_messenger_molecules);R_MMU_2871796(FCERI_mediated_MAPK_activation);R_MMU_168256(Immune_System);R_MMU_1280215(Cytokine_Signaling_in_Immune_system);R_MMU_9006934(Signaling_by_Receptor_Tyrosine_Kinases);R_MMU_1433557(Signaling_by_SCF_KIT);R_MMU_168249(Inn…	0.318065	2.13047	0.149294	-2.74378	5.82748e-29	1.33973e-26	down	yes
ENSMUSG00000117921	Gm50186	72633	ENSMUST00000236398	NA	NA	NA	NA	predicted gene, 50186 [Source:MGI Symbol;Acc:MGI:6302959]	lincRNA	NA	1.1499	7.59775	0.151348	-2.72406	5.5207e-29	1.28787e-26	down	yes
ENSMUSG00000066108	Muc5b	127571	ENSMUST00000165147	GO:0003674(molecular_function);GO:0005515(protein binding);GO:0005615(extracellular space);GO:0042742(defense response to bacterium);GO:0043030(regulation of macrophage activation);GO:0043231(intracellular membrane-bounded organelle)	04657(IL-17 signaling pathway);04970(Salivary secretion)	K13908	NA	mucin 5, subtype B, tracheobronchial [Source:MGI Symbol;Acc:MGI:1921430]	protein_coding	R_MMU_913709(O_linked_glycosylation_of_mucins);R_MMU_5173105(O_linked_glycosylation);R_MMU_597592(Post_translational_protein_modification);R_MMU_392499(Metabolism_of_proteins);R_MMU_977068(Termination_of_O_glycan_biosynthesis)	3.00712	19.0073	0.158209	-2.6601	2.27331e-35	9.48989e-33	down	yes
ENSMUSG00000030650	Tmc5	125262;125265;125263	ENSMUST00000121715;ENSMUST00000057320;ENSMUST00000121744	GO:0005887(integral component of plasma membrane);GO:0006811(ion transport);GO:0008381(mechanosensitive ion channel activity);GO:0016020(membrane);GO:0016021(integral component of membrane);GO:0034220(ion transmembrane transport);GO:0034220(ion transmembrane transport)	NA	K21988	NA	transmembrane channel-like gene family 5 [Source:MGI Symbol;Acc:MGI:1921674]	protein_coding	NA	1.04469	6.59918	0.158306	-2.65921	8.9461e-32	2.72908e-29	down	yes
ENSMUSG00000076589	Igkv8-18	110736	ENSMUST00000103390	GO:0002377(immunoglobulin production);GO:0005615(extracellular space);GO:0006955(immune response)	NA	NA	NA	immunoglobulin kappa variable 8-18 [Source:MGI Symbol;Acc:MGI:1330845]	IG_V_gene	NA	3.01764	19.0388	0.1585	-2.65745	2.8505e-24	4.75974e-22	down	yes
ENSMUSG00000034112	Atp2c2	133740	ENSMUST00000095171	GO:0000139(Golgi membrane);GO:0000166(nucleotide binding);GO:0005388(calcium transmembrane transporter activity, phosphorylative mechanism);GO:0005515(protein binding);GO:0005524(ATP binding);GO:0005783(endoplasmic reticulum);GO:0005886(plasma membrane);GO:0006811(ion transport);GO:0006816(calcium ion transport);GO:0006828(manganese ion transport);GO:0006874(cellular calcium ion homeostasis);GO:0…	NA	K01537	EC:7.2.2.10	ATPase, Ca++ transporting, type 2C, member 2 [Source:MGI Symbol;Acc:MGI:1916297]	protein_coding	R_MMU_936837(Ion_transport_by_P_type_ATPases);R_MMU_382551(Transport_of_small_molecules);R_MMU_983712(Ion_channel_transport)	1.0637	6.61595	0.160778	-2.63686	5.12309e-30	1.35446e-27	down	yes
ENSMUSG00000041605	Inava	13004;13006;13010;13007;13008	ENSMUST00000120339;ENSMUST00000150163;ENSMUST00000195177;ENSMUST00000144464;ENSMUST00000194374	GO:0000187(activation of MAPK activity);GO:0002221(pattern recognition receptor signaling pathway);GO:0002367(cytokine production involved in immune response);GO:0005634(nucleus);GO:0005737(cytoplasm);GO:0031398(positive regulation of protein ubiquitination);GO:0032494(response to peptidoglycan);GO:0032495(response to muramyl dipeptide);GO:0032731(positive regulation of interleukin-1 beta product…	NA	NA	NA	innate immunity activator [Source:MGI Symbol;Acc:MGI:1921579]	protein_coding;retained_intron	NA	0.222598	1.35495	0.164286	-2.60572	8.2091e-23	1.18383e-20	down	yes
ENSMUSG00000103297	Ighv3-2	36397	ENSMUST00000191842	NA	NA	NA	NA	immunoglobulin heavy variable 3-2 [Source:MGI Symbol;Acc:MGI:4439923]	IG_V_pseudogene	NA	21.801	132.028	0.165123	-2.59838	8.0629e-32	2.55804e-29	down	yes
ENSMUSG00000047730	Fcgbp	118296;118299;118297;118298;118300	ENSMUST00000076648;ENSMUST00000154481;ENSMUST00000140004;ENSMUST00000148946;ENSMUST00000131090	GO:0005515(protein binding);GO:0008150(biological_process);GO:0031012(extracellular matrix);GO:0031012(extracellular matrix)	NA	NA	NA	Fc fragment of IgG binding protein [Source:MGI Symbol;Acc:MGI:2444336]	protein_coding;retained_intron;processed_transcript	NA	3.45256	20.5761	0.167794	-2.57523	1.97576e-33	6.81335e-31	down	yes
ENSMUSG00000061068	Mcpt4	46336	ENSMUST00000043249	GO:0004252(serine-type endopeptidase activity);GO:0006508(proteolysis);GO:0008233(peptidase activity);GO:0008236(serine-type peptidase activity);GO:0016787(hydrolase activity)	04614(Renin-angiotensin system)	K01329	EC:3.4.21.39	mast cell protease 4 [Source:MGI Symbol;Acc:MGI:96940]	protein_coding	NA	1.18114	6.97266	0.169396	-2.56153	3.89995e-23	5.8919e-21	down	yes
ENSMUSG00000037974	Muc5ac	127568;127569	ENSMUST00000155534;ENSMUST00000041924	GO:0005515(protein binding);GO:0005615(extracellular space);GO:0005737(cytoplasm);GO:0036438(maintenance of lens transparency);GO:0048015(phosphatidylinositol-mediated signaling);GO:0070701(mucus layer);GO:0070701(mucus layer)	04657(IL-17 signaling pathway);04657(IL-17 signaling pathway)	K21125	NA	mucin 5, subtypes A and C, tracheobronchial/gastric [Source:MGI Symbol;Acc:MGI:104697]	protein_coding	R_MMU_913709(O_linked_glycosylation_of_mucins);R_MMU_5173105(O_linked_glycosylation);R_MMU_597592(Post_translational_protein_modification);R_MMU_392499(Metabolism_of_proteins);R_MMU_977068(Termination_of_O_glycan_biosynthesis)	0.590131	3.45098	0.171004	-2.5479	2.18441e-30	5.97437e-28	down	yes
ENSMUSG00000024990	Rbp4	71651;71650;71652;71653	ENSMUST00000112335;ENSMUST00000025951;ENSMUST00000236283;ENSMUST00000237287	GO:0001654(eye development);GO:0005501(retinoid binding);GO:0005515(protein binding);GO:0005576(extracellular region);GO:0005615(extracellular space);GO:0006094(gluconeogenesis);GO:0007283(spermatogenesis);GO:0007507(heart development);GO:0008584(male gonad development);GO:0016918(retinal binding);GO:0019841(retinol binding);GO:0030277(maintenance of gastrointestinal epithelium);GO:0030324(lung d…	NA	K18271	NA	retinol binding protein 4, plasma [Source:MGI Symbol;Acc:MGI:97879]	protein_coding	R_MMU_196854(Metabolism_of_vitamins_and_cofactors);R_MMU_2453902(The_canonical_retinoid_cycle_in_rods_(twilight_vision));R_MMU_1430728(Metabolism);R_MMU_6806667(Metabolism_of_fat_soluble_vitamins);R_MMU_9709957(Sensory_Perception);R_MMU_2187338(Visual_phototransduction);R_MMU_975634(Retinoid_metabolism_and_transport)	9.00036	52.5387	0.171309	-2.54533	1.4199e-31	4.17109e-29	down	yes
ENSMUSG00000091345	Col6a5	140542;140544	ENSMUST00000190193;ENSMUST00000189127	NA	04151(PI3K-Akt signaling pathway);04510(Focal adhesion);04512(ECM-receptor interaction);04974(Protein digestion and absorption);05165(Human papillomavirus infection);05165(Human papillomavirus infection)	K06238	NA	collagen, type VI, alpha 5 [Source:MGI Symbol;Acc:MGI:3648134]	protein_coding;retained_intron	R_MMU_1650814(Collagen_biosynthesis_and_modifying_enzymes);R_MMU_1442490(Collagen_degradation);R_MMU_419037(NCAM1_interactions);R_MMU_2022090(Assembly_of_collagen_fibrils_and_other_multimeric_structures);R_MMU_8948216(Collagen_chain_trimerization);R_MMU_375165(NCAM_signaling_for_neurite_out_growth);R_MMU_1474244(Extracellular_matrix_organization);R_MMU_1474228(Degradation_of_the_extracellular_mat…	0.984494	5.62445	0.175038	-2.51426	1.77579e-30	4.942e-28	down	yes
ENSMUSG00000094509	Ighv14-1	36390	ENSMUST00000103463	GO:0003823(antigen binding);GO:0006910(phagocytosis, recognition);GO:0006911(phagocytosis, engulfment);GO:0006958(complement activation, classical pathway);GO:0009897(external side of plasma membrane);GO:0034987(immunoglobulin receptor binding);GO:0042571(immunoglobulin complex, circulating);GO:0042742(defense response to bacterium);GO:0045087(innate immune response);GO:0050853(B cell receptor si…	NA	NA	NA	immunoglobulin heavy variable 14-1 [Source:MGI Symbol;Acc:MGI:4439920]	IG_V_gene	R_MMU_2871809(FCERI_mediated_Ca+2_mobilization);R_MMU_977606(Regulation_of_Complement_cascade);R_MMU_5653656(Vesicle_mediated_transport);R_MMU_2029481(FCGR_activation);R_MMU_2029480(Fcgamma_receptor_(FCGR)_dependent_phagocytosis);R_MMU_983705(Signaling_by_the_B_Cell_Receptor_(BCR));R_MMU_109582(Hemostasis);R_MMU_173623(Classical_antibody_mediated_complement_activation);R_MMU_166663(Initial_trigge…	18.7942	107.003	0.175643	-2.50928	1.23442e-29	3.05962e-27	down	yes
ENSMUSG00000025140	Pycr1	31157;31158;31161	ENSMUST00000170556;ENSMUST00000026133;ENSMUST00000139706	GO:0004735(pyrroline-5-carboxylate reductase activity);GO:0005739(mitochondrion);GO:0006561(proline biosynthetic process);GO:0008652(cellular amino acid biosynthetic process);GO:0016491(oxidoreductase activity);GO:0034599(cellular response to oxidative stress);GO:0042802(identical protein binding);GO:0051881(regulation of mitochondrial membrane potential);GO:0055114(oxidation-reduction process);G…	00330(Arginine and proline metabolism);00330(Arginine and proline metabolism)	K00286	EC:1.5.1.2	pyrroline-5-carboxylate reductase 1 [Source:MGI Symbol;Acc:MGI:2384795]	protein_coding	R_MMU_1430728(Metabolism);R_MMU_8964539(Glutamate_and_glutamine_metabolism);R_MMU_71291(Metabolism_of_amino_acids_and_derivatives)	0.338279	1.92089	0.176106	-2.50549	1.90039e-22	2.59879e-20	down	yes
ENSMUSG00000058952	Cfi	89730	ENSMUST00000077918	GO:0002376(immune system process);GO:0004252(serine-type endopeptidase activity);GO:0005044(scavenger receptor activity);GO:0005515(protein binding);GO:0005576(extracellular region);GO:0005615(extracellular space);GO:0005634(nucleus);GO:0006508(proteolysis);GO:0006897(endocytosis);GO:0006956(complement activation);GO:0006958(complement activation, classical pathway);GO:0008233(peptidase activity)…	04610(Complement and coagulation cascades);05150(Staphylococcus aureus infection)	K01333	EC:3.4.21.45	complement component factor i [Source:MGI Symbol;Acc:MGI:105937]	protein_coding	R_MMU_977606(Regulation_of_Complement_cascade);R_MMU_166658(Complement_cascade);R_MMU_168256(Immune_System);R_MMU_168249(Innate_Immune_System)	0.592031	3.33679	0.177425	-2.49472	4.00155e-22	5.203e-20	down	yes
ENSMUSG00000076695	Ighv1-18	36473	ENSMUST00000194350	GO:0003823(antigen binding);GO:0006910(phagocytosis, recognition);GO:0006911(phagocytosis, engulfment);GO:0006958(complement activation, classical pathway);GO:0009897(external side of plasma membrane);GO:0034987(immunoglobulin receptor binding);GO:0042571(immunoglobulin complex, circulating);GO:0042742(defense response to bacterium);GO:0045087(innate immune response);GO:0050853(B cell receptor si…	NA	NA	NA	immunoglobulin heavy variable V1-18 [Source:MGI Symbol;Acc:MGI:4439780]	IG_V_gene	R_MMU_2871809(FCERI_mediated_Ca+2_mobilization);R_MMU_977606(Regulation_of_Complement_cascade);R_MMU_5653656(Vesicle_mediated_transport);R_MMU_2029481(FCGR_activation);R_MMU_2029480(Fcgamma_receptor_(FCGR)_dependent_phagocytosis);R_MMU_983705(Signaling_by_the_B_Cell_Receptor_(BCR));R_MMU_109582(Hemostasis);R_MMU_173623(Classical_antibody_mediated_complement_activation);R_MMU_166663(Initial_trigge…	121.765	685.425	0.177649	-2.4929	1.05913e-31	3.17001e-29	down	yes
ENSMUSG00000079323	Gm20661	141011;141012;141013	ENSMUST00000176382;ENSMUST00000176166;ENSMUST00000177368	NA	NA	NA	NA	predicted gene 20661 [Source:MGI Symbol;Acc:MGI:5313108]	retained_intron;nonsense_mediated_decay	NA	1.5833	8.83417	0.179225	-2.48016	6.91771e-27	1.37169e-24	down	yes
ENSMUSG00000078664	Sprr2a1	87305	ENSMUST00000074449	GO:0001533(cornified envelope);GO:0005200(structural constituent of cytoskeleton);GO:0005634(nucleus);GO:0005737(cytoplasm);GO:0007010(cytoskeleton organization);GO:0008360(regulation of cell shape);GO:0008544(epidermis development);GO:0030216(keratinocyte differentiation);GO:0031424(keratinization);GO:0032355(response to estradiol)	NA	NA	NA	small proline-rich protein 2A1 [Source:MGI Symbol;Acc:MGI:1330350]	protein_coding	NA	2.13715	11.7859	0.181332	-2.4633	1.15813e-28	2.58752e-26	down	yes
ENSMUSG00000030302	Atp2b2	112943;112949;112945;112947	ENSMUST00000101045;ENSMUST00000135199;ENSMUST00000152831;ENSMUST00000101044	GO:0000166(nucleotide binding);GO:0000902(cell morphogenesis);GO:0005388(calcium transmembrane transporter activity, phosphorylative mechanism);GO:0005509(calcium ion binding);GO:0005516(calmodulin binding);GO:0005524(ATP binding);GO:0005737(cytoplasm);GO:0005783(endoplasmic reticulum);GO:0005886(plasma membrane);GO:0005929(cilium);GO:0006811(ion transport);GO:0006816(calcium ion transport);GO:00…	04020(Calcium signaling pathway);04022(cGMP-PKG signaling pathway);04024(cAMP signaling pathway);04261(Adrenergic signaling in cardiomyocytes);04925(Aldosterone synthesis and secretion);04970(Salivary secretion);04972(Pancreatic secretion);04972(Pancreatic secretion)	K05850	EC:7.2.2.10	ATPase, Ca++ transporting, plasma membrane 2 [Source:MGI Symbol;Acc:MGI:105368]	protein_coding;retained_intron;nonsense_mediated_decay	R_MMU_418346(Platelet_homeostasis);R_MMU_936837(Ion_transport_by_P_type_ATPases);R_MMU_109582(Hemostasis);R_MMU_382551(Transport_of_small_molecules);R_MMU_418360(Platelet_calcium_homeostasis);R_MMU_5576891(Cardiac_conduction);R_MMU_5578775(Ion_homeostasis);R_MMU_397014(Muscle_contraction);R_MMU_983712(Ion_channel_transport);R_MMU_418359(Reduction_of_cytosolic_Ca++_levels)	0.376995	2.06802	0.182298	-2.45563	1.09606e-27	2.28773e-25	down	yes
ENSMUSG00000029228	Lnx1	102013;102021	ENSMUST00000113531;ENSMUST00000117388	GO:0004842(ubiquitin-protein transferase activity);GO:0005515(protein binding);GO:0005737(cytoplasm);GO:0006511(ubiquitin-dependent protein catabolic process);GO:0016567(protein ubiquitination);GO:0016740(transferase activity);GO:0030165(PDZ domain binding);GO:0042802(identical protein binding);GO:0046872(metal ion binding);GO:0046872(metal ion binding)	NA	K10692	EC:2.3.2.27	ligand of numb-protein X 1 [Source:MGI Symbol;Acc:MGI:1278335]	protein_coding	R_MMU_168256(Immune_System);R_MMU_983168(Antigen_processing:_Ubiquitination_&_Proteasome_degradation);R_MMU_1280218(Adaptive_Immune_System);R_MMU_983169(Class_I_MHC_mediated_antigen_processing_&_presentation)	0.267407	1.46673	0.182315	-2.45549	5.94979e-20	6.46448e-18	down	yes
ENSMUSG00000079620	Muc4	55547;55549;55553;55546;55554;55551;55548	ENSMUST00000096106;ENSMUST00000135753;ENSMUST00000149773;ENSMUST00000132475;ENSMUST00000131419;ENSMUST00000143297;ENSMUST00000142355	GO:0005176(ErbB-2 class receptor binding);GO:0005615(extracellular space);GO:0007160(cell-matrix adhesion);GO:0010469(regulation of signaling receptor activity);GO:0016020(membrane);GO:0016021(integral component of membrane);GO:0030197(extracellular matrix constituent, lubricant activity);GO:0030197(extracellular matrix constituent, lubricant activity)	NA	K22017	NA	mucin 4 [Source:MGI Symbol;Acc:MGI:2153525]	protein_coding;retained_intron;processed_transcript	NA	1.45519	7.97999	0.182354	-2.45518	2.29143e-30	6.16085e-28	down	yes
ENSMUSG00000079543	Igkv13-85	110622	ENSMUST00000114212	GO:0002377(immunoglobulin production);GO:0005615(extracellular space);GO:0006955(immune response)	NA	NA	NA	immunoglobulin kappa chain variable 13-85 [Source:MGI Symbol;Acc:MGI:4439827]	IG_V_gene	NA	27.4907	150.607	0.182532	-2.45378	2.88708e-29	7.0458e-27	down	yes
ENSMUSG00000068893	Sprr2a2	87306;87309	ENSMUST00000090871;ENSMUST00000071805	GO:0001533(cornified envelope);GO:0005200(structural constituent of cytoskeleton);GO:0005634(nucleus);GO:0005737(cytoplasm);GO:0007010(cytoskeleton organization);GO:0008360(regulation of cell shape);GO:0008544(epidermis development);GO:0030216(keratinocyte differentiation);GO:0031424(keratinization);GO:0032355(response to estradiol);GO:0032355(response to estradiol)	NA	NA	NA	small proline-rich protein 2A2 [Source:MGI Symbol;Acc:MGI:3845026]	protein_coding	NA	2.2308	12.1626	0.183415	-2.44682	2.76657e-28	5.93054e-26	down	yes
ENSMUSG00000022518	4930562C15Rik	53609;53611;53614;53608;53615	ENSMUST00000100211;ENSMUST00000171105;ENSMUST00000175762;ENSMUST00000177042;ENSMUST00000180939	GO:0003674(molecular_function);GO:0005575(cellular_component);GO:0008150(biological_process);GO:0008150(biological_process)	NA	NA	NA	RIKEN cDNA 4930562C15 gene [Source:MGI Symbol;Acc:MGI:1926059]	protein_coding;nonsense_mediated_decay;processed_transcript;retained_intron	NA	0.760776	4.10532	0.185315	-2.43195	1.51438e-26	2.92958e-24	down	yes
ENSMUSG00000035105	Egln3	32986	ENSMUST00000039516	GO:0001666(response to hypoxia);GO:0005506(iron ion binding);GO:0005634(nucleus);GO:0005737(cytoplasm);GO:0005829(cytosol);GO:0006915(apoptotic process);GO:0006919(activation of cysteine-type endopeptidase activity involved in apoptotic process);GO:0016491(oxidoreductase activity);GO:0016705(oxidoreductase activity, acting on paired donors, with incorporation or reduction of molecular oxygen);GO:…	04066(HIF-1 signaling pathway);05200(Pathways in cancer);05211(Renal cell carcinoma)	K09592	EC:1.14.11.29	egl-9 family hypoxia-inducible factor 3 [Source:MGI Symbol;Acc:MGI:1932288]	protein_coding	R_MMU_1234176(Oxygen_dependent_proline_hydroxylation_of_Hypoxia_inducible_Factor_Alpha);R_MMU_1234174(Cellular_response_to_hypoxia);R_MMU_2262752(Cellular_responses_to_stress);R_MMU_8953897(Cellular_responses_to_external_stimuli)	0.859891	4.63788	0.185406	-2.43124	2.59989e-24	4.38745e-22	down	yes
ENSMUSG00000061100	Retnla	56313;56312	ENSMUST00000023329;ENSMUST00000238847	GO:0005179(hormone activity);GO:0005576(extracellular region);GO:0005615(extracellular space);GO:0007165(signal transduction);GO:0007165(signal transduction)	NA	NA	NA	resistin like alpha [Source:MGI Symbol;Acc:MGI:1888504]	protein_coding	NA	2058.54	11095	0.185538	-2.43021	1.09907e-30	3.11332e-28	down	yes
ENSMUSG00000019761	Krt10	28849;28850	ENSMUST00000103131;ENSMUST00000211768	GO:0001533(cornified envelope);GO:0005198(structural molecule activity);GO:0005737(cytoplasm);GO:0005882(intermediate filament);GO:0018149(peptide cross-linking);GO:0030216(keratinocyte differentiation);GO:0030280(structural constituent of skin epidermis);GO:0046982(protein heterodimerization activity);GO:0051290(protein heterotetramerization);GO:0051290(protein heterotetramerization)	04915(Estrogen signaling pathway);05150(Staphylococcus aureus infection);05150(Staphylococcus aureus infection)	K07604	NA	keratin 10 [Source:MGI Symbol;Acc:MGI:96685]	protein_coding	R_MMU_6805567(Keratinization);R_MMU_6809371(Formation_of_the_cornified_envelope);R_MMU_1266738(Developmental_Biology)	1.07426	5.77046	0.186165	-2.42534	3.86408e-24	6.31917e-22	down	yes
ENSMUSG00000096459	Ighv9-3	36408	ENSMUST00000103473	GO:0003823(antigen binding);GO:0006910(phagocytosis, recognition);GO:0006911(phagocytosis, engulfment);GO:0006958(complement activation, classical pathway);GO:0009897(external side of plasma membrane);GO:0034987(immunoglobulin receptor binding);GO:0042571(immunoglobulin complex, circulating);GO:0042742(defense response to bacterium);GO:0045087(innate immune response);GO:0050853(B cell receptor si…	NA	NA	NA	immunoglobulin heavy variable V9-3 [Source:MGI Symbol;Acc:MGI:3642720]	IG_V_gene	NA	32.3665	173.319	0.186745	-2.42086	6.40152e-29	1.45067e-26	down	yes
ENSMUSG00000102524	Ighv1-2	36443	ENSMUST00000195325	NA	NA	NA	NA	immunoglobulin heavy variable 1-2 [Source:MGI Symbol;Acc:MGI:4439924]	IG_V_pseudogene	NA	3.63592	19.453	0.186908	-2.4196	3.61766e-21	4.41438e-19	down	yes
ENSMUSG00000020651	Slc26a4	32469;32470	ENSMUST00000001253;ENSMUST00000218992	GO:0005886(plasma membrane);GO:0005887(integral component of plasma membrane);GO:0006885(regulation of pH);GO:0008271(secondary active sulfate transmembrane transporter activity);GO:0008272(sulfate transport);GO:0008509(anion transmembrane transporter activity);GO:0009887(animal organ morphogenesis);GO:0015106(bicarbonate transmembrane transporter activity);GO:0015108(chloride transmembrane trans…	04918(Thyroid hormone synthesis);04918(Thyroid hormone synthesis)	NA	NA	solute carrier family 26, member 4 [Source:MGI Symbol;Acc:MGI:1346029]	protein_coding;processed_transcript	R_MMU_425393(Transport_of_inorganic_cations/anions_and_amino_acids/oligopeptides);R_MMU_425407(SLC_mediated_transmembrane_transport);R_MMU_382551(Transport_of_small_molecules);R_MMU_427601(Multifunctional_anion_exchangers)	17.5377	92.342	0.189921	-2.39653	9.82818e-30	2.47467e-27	down	yes
ENSMUSG00000094164	Ighv2-3	36347	ENSMUST00000178229	GO:0003823(antigen binding);GO:0006910(phagocytosis, recognition);GO:0006911(phagocytosis, engulfment);GO:0006958(complement activation, classical pathway);GO:0009897(external side of plasma membrane);GO:0034987(immunoglobulin receptor binding);GO:0042571(immunoglobulin complex, circulating);GO:0042742(defense response to bacterium);GO:0045087(innate immune response);GO:0050853(B cell receptor si…	NA	NA	NA	immunoglobulin heavy variable 2-3 [Source:MGI Symbol;Acc:MGI:4439872]	IG_V_gene	NA	83.672	436.446	0.191712	-2.38299	3.05502e-29	7.34269e-27	down	yes
ENSMUSG00000020581	Agr2	32626;32625	ENSMUST00000020898;ENSMUST00000147861	GO:0002162(dystroglycan binding);GO:0005154(epidermal growth factor receptor binding);GO:0005576(extracellular region);GO:0005615(extracellular space);GO:0005739(mitochondrion);GO:0005783(endoplasmic reticulum);GO:0010628(positive regulation of gene expression);GO:0010811(positive regulation of cell-substrate adhesion);GO:0042802(identical protein binding);GO:0045742(positive regulation of epider…	NA	NA	NA	anterior gradient 2 [Source:MGI Symbol;Acc:MGI:1344405]	protein_coding;retained_intron	NA	2.97305	15.4024	0.193025	-2.37314	2.81514e-25	5.19263e-23	down	yes
ENSMUSG00000030867	Plk1	125589	ENSMUST00000033154	GO:0000070(mitotic sister chromatid segregation);GO:0000086(G2/M transition of mitotic cell cycle);GO:0000122(negative regulation of transcription by RNA polymerase II);GO:0000132(establishment of mitotic spindle orientation);GO:0000166(nucleotide binding);GO:0000278(mitotic cell cycle);GO:0000281(mitotic cytokinesis);GO:0000287(magnesium ion binding);GO:0000775(chromosome, centromeric region);GO…	04068(FoxO signaling pathway);04110(Cell cycle);04114(Oocyte meiosis);04914(Progesterone-mediated oocyte maturation)	K06631	EC:2.7.11.21	polo like kinase 1 [Source:MGI Symbol;Acc:MGI:97621]	protein_coding	R_MMU_2299718(Condensation_of_Prophase_Chromosomes);R_MMU_380287(Centrosome_maturation);R_MMU_8852276(The_role_of_GTSE1_in_G2/M_progression_after_G2_checkpoint);R_MMU_176417(Phosphorylation_of_Emi1);R_MMU_380259(Loss_of_Nlp_from_mitotic_centrosomes);R_MMU_69620(Cell_Cycle_Checkpoints);R_MMU_2565942(Regulation_of_PLK1_Activity_at_G2/M_Transition);R_MMU_176814(Activation_of_APC/C_and_APC/C:Cdc20_me…	0.510611	2.63711	0.193625	-2.36866	3.18591e-19	3.21899e-17	down	yes
ENSMUSG00000027676	Ccdc39	84714;84720;84717;84715;84719;84718	ENSMUST00000029222;ENSMUST00000197230;ENSMUST00000200300;ENSMUST00000200536;ENSMUST00000200551;ENSMUST00000200277	GO:0001947(heart looping);GO:0003341(cilium movement);GO:0003356(regulation of cilium beat frequency);GO:0003674(molecular_function);GO:0005576(extracellular region);GO:0005737(cytoplasm);GO:0005829(cytosol);GO:0005856(cytoskeleton);GO:0005929(cilium);GO:0005930(axoneme);GO:0007368(determination of left/right symmetry);GO:0007507(heart development);GO:0030317(flagellated sperm motility);GO:003032…	NA	NA	NA	coiled-coil domain containing 39 [Source:MGI Symbol;Acc:MGI:1289263]	protein_coding;retained_intron	NA	1.98135	10.2304	0.193672	-2.36831	2.02981e-28	4.47206e-26	down	yes
ENSMUSG00000061723	Tnnt3	127691;127695;127687;127697;127685;127711;127698;127706;127692	ENSMUST00000125649;ENSMUST00000169299;ENSMUST00000105952;ENSMUST00000209807;ENSMUST00000074187;ENSMUST00000144259;ENSMUST00000105958;ENSMUST00000105945;ENSMUST00000179658	GO:0003009(skeletal muscle contraction);GO:0003779(actin binding);GO:0005523(tropomyosin binding);GO:0005861(troponin complex);GO:0006937(regulation of muscle contraction);GO:0006942(regulation of striated muscle contraction);GO:0030172(troponin C binding);GO:0031013(troponin I binding);GO:0043462(regulation of ATPase activity);GO:0048306(calcium-dependent protein binding);GO:1903612(positive reg…	NA	K12046	NA	troponin T3, skeletal, fast [Source:MGI Symbol;Acc:MGI:109550]	processed_transcript;protein_coding;retained_intron	R_MMU_390522(Striated_Muscle_Contraction);R_MMU_397014(Muscle_contraction)	0.787322	4.04619	0.194584	-2.36154	1.01779e-19	1.07635e-17	down	yes
ENSMUSG00000095170	Ighv8-11	36564	ENSMUST00000103536	GO:0003823(antigen binding);GO:0006910(phagocytosis, recognition);GO:0006911(phagocytosis, engulfment);GO:0006958(complement activation, classical pathway);GO:0009897(external side of plasma membrane);GO:0034987(immunoglobulin receptor binding);GO:0042571(immunoglobulin complex, circulating);GO:0042742(defense response to bacterium);GO:0045087(innate immune response);GO:0050853(B cell receptor si…	NA	NA	NA	immunoglobulin heavy variable V8-11 [Source:MGI Symbol;Acc:MGI:3644925]	IG_V_gene	R_MMU_2871809(FCERI_mediated_Ca+2_mobilization);R_MMU_977606(Regulation_of_Complement_cascade);R_MMU_5653656(Vesicle_mediated_transport);R_MMU_2029481(FCGR_activation);R_MMU_2029480(Fcgamma_receptor_(FCGR)_dependent_phagocytosis);R_MMU_983705(Signaling_by_the_B_Cell_Receptor_(BCR));R_MMU_109582(Hemostasis);R_MMU_173623(Classical_antibody_mediated_complement_activation);R_MMU_166663(Initial_trigge…	6.52524	33.1467	0.196859	-2.34476	7.5728e-23	1.11229e-20	down	yes
ENSMUSG00000030672	Mylpf	126122;126124;126120;126123;126125	ENSMUST00000032910;ENSMUST00000143222;ENSMUST00000206204;ENSMUST00000127710;ENSMUST00000139613	GO:0005509(calcium ion binding);GO:0006955(immune response);GO:0007519(skeletal muscle tissue development);GO:0008307(structural constituent of muscle);GO:0016459(myosin complex);GO:0046872(metal ion binding);GO:0046872(metal ion binding)	04510(Focal adhesion);04670(Leukocyte transendothelial migration);04810(Regulation of actin cytoskeleton);04810(Regulation of actin cytoskeleton)	K12758	NA	myosin light chain, phosphorylatable, fast skeletal muscle [Source:MGI Symbol;Acc:MGI:97273]	protein_coding;retained_intron	R_MMU_445355(Smooth_Muscle_Contraction);R_MMU_397014(Muscle_contraction)	0.961745	4.77753	0.201306	-2.31254	1.51437e-17	1.23827e-15	down	yes
ENSMUSG00000089901	Gm8113	44575	ENSMUST00000160298	GO:0003674(molecular_function);GO:0005575(cellular_component);GO:0008150(biological_process);GO:0016020(membrane);GO:0016021(integral component of membrane)	NA	NA	NA	predicted gene 8113 [Source:MGI Symbol;Acc:MGI:3648791]	protein_coding	NA	1.54864	7.64638	0.202532	-2.30378	2.51849e-24	4.29578e-22	down	yes
ENSMUSG00000064220	H2ac18	87921	ENSMUST00000078756	GO:0000786(nucleosome);GO:0000790(nuclear chromatin);GO:0003677(DNA binding);GO:0005634(nucleus);GO:0005694(chromosome);GO:0006325(chromatin organization);GO:0006334(nucleosome assembly);GO:0006342(chromatin silencing);GO:0046982(protein heterodimerization activity)	04217(Necroptosis);05034(Alcoholism);05322(Systemic lupus erythematosus)	K11251	NA	H2A clustered histone 18 [Source:MGI Symbol;Acc:MGI:96097]	protein_coding	R_MMU_2299718(Condensation_of_Prophase_Chromosomes);R_MMU_774815(Nucleosome_assembly);R_MMU_5689880(Ub_specific_processing_proteases);R_MMU_2559582(Senescence_Associated_Secretory_Phenotype_(SASP));R_MMU_5250913(Positive_epigenetic_regulation_of_rRNA_expression);R_MMU_2559580(Oxidative_Stress_Induced_Senescence);R_MMU_427359(SIRT1_negatively_regulates_rRNA_expression);R_MMU_2559583(Cellular_Senes…	2.13382	10.5264	0.202711	-2.30251	1.16663e-18	1.10816e-16	down	yes
ENSMUSG00000008461	Fut1	120609	ENSMUST00000008605	GO:0005794(Golgi apparatus);GO:0005975(carbohydrate metabolic process);GO:0006486(protein glycosylation);GO:0008107(galactoside 2-alpha-L-fucosyltransferase activity);GO:0016020(membrane);GO:0016740(transferase activity);GO:0016757(transferase activity, transferring glycosyl groups);GO:0032580(Golgi cisterna membrane);GO:0036065(fucosylation)	00601(Glycosphingolipid biosynthesis - lacto and neolacto series);00603(Glycosphingolipid biosynthesis - globo and isoglobo series)	K00718	EC:2.4.1.69	fucosyltransferase 1 [Source:MGI Symbol;Acc:MGI:109375]	protein_coding	R_MMU_71387(Metabolism_of_carbohydrates);R_MMU_1430728(Metabolism);R_MMU_9033658(Blood_group_systems_biosynthesis);R_MMU_9033807(ABO_blood_group_biosynthesis)	0.372071	1.81138	0.205407	-2.28344	2.66983e-17	2.10299e-15	down	yes
ENSMUSG00000059824	Dbp	120637;120640;120641;120638	ENSMUST00000080885;ENSMUST00000211748;ENSMUST00000210120;ENSMUST00000211513	GO:0000977(RNA polymerase II regulatory region sequence-specific DNA binding);GO:0001228(DNA-binding transcription activator activity, RNA polymerase II-specific);GO:0001889(liver development);GO:0003677(DNA binding);GO:0003700(DNA-binding transcription factor activity);GO:0005634(nucleus);GO:0005654(nucleoplasm);GO:0006355(regulation of transcription, DNA-templated);GO:0006357(regulation of tran…	NA	K09056	NA	D site albumin promoter binding protein [Source:MGI Symbol;Acc:MGI:94866]	protein_coding;retained_intron	NA	1.11958	5.43322	0.206063	-2.27885	6.81539e-23	1.01993e-20	down	yes
ENSMUSG00000031430	Vsig1	4162	ENSMUST00000033806	GO:0003382(epithelial cell morphogenesis);GO:0005886(plasma membrane);GO:0016020(membrane);GO:0016021(integral component of membrane);GO:0030277(maintenance of gastrointestinal epithelium)	NA	NA	NA	V-set and immunoglobulin domain containing 1 [Source:MGI Symbol;Acc:MGI:1926039]	protein_coding	NA	0.44068	2.10699	0.209151	-2.25738	7.24539e-18	6.17923e-16	down	yes
ENSMUSG00000024331	Dsc2	65666;65668;65667	ENSMUST00000075214;ENSMUST00000155407;ENSMUST00000039247	GO:0005509(calcium ion binding);GO:0005886(plasma membrane);GO:0005911(cell-cell junction);GO:0005912(adherens junction);GO:0007155(cell adhesion);GO:0007156(homophilic cell adhesion via plasma membrane adhesion molecules);GO:0009267(cellular response to starvation);GO:0014704(intercalated disc);GO:0016020(membrane);GO:0016021(integral component of membrane);GO:0030054(cell junction);GO:0030057(d…	05412(Arrhythmogenic right ventricular cardiomyopathy (ARVC));05412(Arrhythmogenic right ventricular cardiomyopathy (ARVC))	K07601	NA	desmocollin 2 [Source:MGI Symbol;Acc:MGI:103221]	protein_coding	R_MMU_6805567(Keratinization);R_MMU_6809371(Formation_of_the_cornified_envelope);R_MMU_1266738(Developmental_Biology)	0.356976	1.69705	0.210351	-2.24913	5.34673e-20	5.84932e-18	down	yes
ENSMUSG00000078639	Gm12695	93844	ENSMUST00000107071	GO:0003674(molecular_function);GO:0005575(cellular_component);GO:0008150(biological_process)	NA	NA	NA	predicted gene 12695 [Source:MGI Symbol;Acc:MGI:3650206]	protein_coding	NA	0.586703	2.77101	0.211729	-2.23971	3.93927e-17	3.04823e-15	down	yes
ENSMUSG00000034212	Ankmy1	11522;11524	ENSMUST00000212504;ENSMUST00000160548	GO:0005515(protein binding);GO:0005515(protein binding)	NA	NA	NA	ankyrin repeat and MYND domain containing 1 [Source:MGI Symbol;Acc:MGI:3045261]	protein_coding	NA	0.199671	0.914154	0.218422	-2.19481	1.67433e-15	1.03346e-13	down	yes
ENSMUSG00000049985	Ankrd55	42070;42068;42069;42073	ENSMUST00000165593;ENSMUST00000225329;ENSMUST00000168684;ENSMUST00000223871	GO:0003674(molecular_function);GO:0005515(protein binding);GO:0005575(cellular_component);GO:0008150(biological_process);GO:0008150(biological_process)	NA	NA	NA	ankyrin repeat domain 55 [Source:MGI Symbol;Acc:MGI:1924568]	protein_coding;processed_transcript	NA	0.859214	3.9201	0.219182	-2.1898	7.18742e-23	1.06555e-20	down	yes
ENSMUSG00000095571	Ighv5-17	36382	ENSMUST00000103459	GO:0003823(antigen binding);GO:0006910(phagocytosis, recognition);GO:0006911(phagocytosis, engulfment);GO:0006958(complement activation, classical pathway);GO:0009897(external side of plasma membrane);GO:0034987(immunoglobulin receptor binding);GO:0042571(immunoglobulin complex, circulating);GO:0042742(defense response to bacterium);GO:0045087(innate immune response);GO:0050853(B cell receptor si…	NA	NA	NA	immunoglobulin heavy variable 5-17 [Source:MGI Symbol;Acc:MGI:4439533]	IG_V_gene	R_MMU_2871809(FCERI_mediated_Ca+2_mobilization);R_MMU_977606(Regulation_of_Complement_cascade);R_MMU_5653656(Vesicle_mediated_transport);R_MMU_2029481(FCGR_activation);R_MMU_2029480(Fcgamma_receptor_(FCGR)_dependent_phagocytosis);R_MMU_983705(Signaling_by_the_B_Cell_Receptor_(BCR));R_MMU_109582(Hemostasis);R_MMU_173623(Classical_antibody_mediated_complement_activation);R_MMU_166663(Initial_trigge…	136.525	615.896	0.221668	-2.17353	3.11665e-25	5.68268e-23	down	yes
ENSMUSG00000033966	Cdkl4	64600;64601	ENSMUST00000234602;ENSMUST00000234349	GO:0000166(nucleotide binding);GO:0004672(protein kinase activity);GO:0004674(protein serine/threonine kinase activity);GO:0004693(cyclin-dependent protein serine/threonine kinase activity);GO:0005524(ATP binding);GO:0005634(nucleus);GO:0005737(cytoplasm);GO:0006468(protein phosphorylation);GO:0016301(kinase activity);GO:0016310(phosphorylation);GO:0016740(transferase activity);GO:0051726(regulat…	NA	K08824	EC:2.7.11.22	cyclin-dependent kinase-like 4 [Source:MGI Symbol;Acc:MGI:3587025]	protein_coding	NA	1.13234	5.10542	0.221791	-2.17272	1.05164e-21	1.30329e-19	down	yes
ENSMUSG00000022227	Mcpt1	46333	ENSMUST00000022836	GO:0004252(serine-type endopeptidase activity);GO:0005576(extracellular region);GO:0005615(extracellular space);GO:0006508(proteolysis);GO:0008233(peptidase activity);GO:0008236(serine-type peptidase activity);GO:0016787(hydrolase activity);GO:0035690(cellular response to drug)	NA	K08661	EC:3.4.21.-	mast cell protease 1 [Source:MGI Symbol;Acc:MGI:96937]	protein_coding	NA	18.4658	83.2141	0.221907	-2.17197	9.22842e-25	1.62656e-22	down	yes
ENSMUSG00000028555	Ttc39a	94561;94566;94567;94560;94563;94562;94564	ENSMUST00000064129;ENSMUST00000150909;ENSMUST00000139237;ENSMUST00000124209;ENSMUST00000126797;ENSMUST00000106619;ENSMUST00000153315	GO:0003674(molecular_function);GO:0005515(protein binding);GO:0005575(cellular_component);GO:0008150(biological_process);GO:0008150(biological_process)	NA	NA	NA	tetratricopeptide repeat domain 39A [Source:MGI Symbol;Acc:MGI:2444350]	protein_coding;processed_transcript	NA	1.63228	7.32059	0.222971	-2.16507	2.67137e-23	4.1545e-21	down	yes
ENSMUSG00000076731	Ighv8-12	36574	ENSMUST00000199266	GO:0003823(antigen binding);GO:0006910(phagocytosis, recognition);GO:0006911(phagocytosis, engulfment);GO:0006958(complement activation, classical pathway);GO:0009897(external side of plasma membrane);GO:0034987(immunoglobulin receptor binding);GO:0042571(immunoglobulin complex, circulating);GO:0042742(defense response to bacterium);GO:0045087(innate immune response);GO:0050853(B cell receptor si…	NA	NA	NA	immunoglobulin heavy variable V8-12 [Source:MGI Symbol;Acc:MGI:3642873]	IG_V_gene	R_MMU_2871809(FCERI_mediated_Ca+2_mobilization);R_MMU_977606(Regulation_of_Complement_cascade);R_MMU_5653656(Vesicle_mediated_transport);R_MMU_2029481(FCGR_activation);R_MMU_2029480(Fcgamma_receptor_(FCGR)_dependent_phagocytosis);R_MMU_983705(Signaling_by_the_B_Cell_Receptor_(BCR));R_MMU_109582(Hemostasis);R_MMU_173623(Classical_antibody_mediated_complement_activation);R_MMU_166663(Initial_trigge…	113.749	506.676	0.2245	-2.15521	8.61787e-25	1.53601e-22	down	yes
ENSMUSG00000076620	Ighj2	36310;36311	ENSMUST00000192746;ENSMUST00000103429	NA	NA	NA	NA	immunoglobulin heavy joining 2 [Source:MGI Symbol;Acc:MGI:4439803]	IG_J_gene;processed_transcript	NA	165.875	736.482	0.225226	-2.15055	3.12898e-24	5.17031e-22	down	yes
ENSMUSG00000028699	Tspan1	94851;94852;94853	ENSMUST00000030465;ENSMUST00000143426;ENSMUST00000154534	GO:0005654(nucleoplasm);GO:0005737(cytoplasm);GO:0005764(lysosome);GO:0005765(lysosomal membrane);GO:0005886(plasma membrane);GO:0005887(integral component of plasma membrane);GO:0016020(membrane);GO:0016021(integral component of membrane);GO:0030054(cell junction);GO:0031982(vesicle);GO:0043231(intracellular membrane-bounded organelle);GO:0048471(perinuclear region of cytoplasm);GO:0050821(prote…	NA	K17348	NA	tetraspanin 1 [Source:MGI Symbol;Acc:MGI:1914055]	protein_coding;retained_intron	NA	10.1476	44.9401	0.225803	-2.14687	2.16644e-24	3.73547e-22	down	yes
ENSMUSG00000024972	Lgals12	69905;69906;69904	ENSMUST00000099729;ENSMUST00000079902;ENSMUST00000159983	GO:0005178(integrin binding);GO:0005634(nucleus);GO:0005737(cytoplasm);GO:0005739(mitochondrion);GO:0006915(apoptotic process);GO:0030246(carbohydrate binding);GO:0030395(lactose binding);GO:0045598(regulation of fat cell differentiation);GO:0050994(regulation of lipid catabolic process);GO:0097193(intrinsic apoptotic signaling pathway);GO:1904977(lymphatic endothelial cell migration);GO:1904977(…	NA	K10095	NA	lectin, galactose binding, soluble 12 [Source:MGI Symbol;Acc:MGI:1929094]	protein_coding	NA	0.530866	2.34247	0.226627	-2.14161	2.77759e-17	2.17049e-15	down	yes
ENSMUSG00000032496	Ltf	141684;141691;141692;141688;141687	ENSMUST00000035077;ENSMUST00000198233;ENSMUST00000197575;ENSMUST00000197893;ENSMUST00000200459	GO:0001503(ossification);GO:0001530(lipopolysaccharide binding);GO:0001817(regulation of cytokine production);GO:0002227(innate immune response in mucosa);GO:0002376(immune system process);GO:0004252(serine-type endopeptidase activity);GO:0004869(cysteine-type endopeptidase inhibitor activity);GO:0005506(iron ion binding);GO:0005576(extracellular region);GO:0005615(extracellular space);GO:0005737…	NA	K17283	EC:3.4.21.-	lactotransferrin [Source:MGI Symbol;Acc:MGI:96837]	protein_coding;retained_intron	R_MMU_6803157(Antimicrobial_peptides);R_MMU_168256(Immune_System);R_MMU_6798695(Neutrophil_degranulation);R_MMU_168249(Innate_Immune_System);R_MMU_6799990(Metal_sequestration_by_antimicrobial_proteins)	6.51357	28.5953	0.227785	-2.13426	4.22733e-24	6.84266e-22	down	yes
ENSMUSG00000073628	Gm10552	10940;10939	ENSMUST00000113396;ENSMUST00000161763	NA	NA	NA	NA	predicted gene 10552 [Source:MGI Symbol;Acc:MGI:3642083]	antisense	NA	0.874561	3.74504	0.233525	-2.09835	3.27721e-14	1.64514e-12	down	yes
ENSMUSG00000059854	Hydin	133404;133407	ENSMUST00000043141;ENSMUST00000212034	GO:0002064(epithelial cell development);GO:0003341(cilium movement);GO:0003674(molecular_function);GO:0005929(cilium);GO:0007275(multicellular organism development);GO:0007420(brain development);GO:0021591(ventricular system development);GO:0042995(cell projection);GO:0060438(trachea development);GO:1904158(axonemal central apparatus assembly);GO:1990718(axonemal central pair projection);GO:19907…	NA	K17570	NA	HYDIN, axonemal central pair apparatus protein [Source:MGI Symbol;Acc:MGI:2389007]	protein_coding;retained_intron	NA	0.498393	2.12854	0.234148	-2.09451	3.12472e-22	4.13061e-20	down	yes
ENSMUSG00000025355	Mmp19	22387;22388;22386	ENSMUST00000026411;ENSMUST00000218021;ENSMUST00000219404	GO:0001525(angiogenesis);GO:0001541(ovarian follicle development);GO:0001542(ovulation from ovarian follicle);GO:0001554(luteolysis);GO:0004222(metalloendopeptidase activity);GO:0005576(extracellular region);GO:0005615(extracellular space);GO:0005886(plasma membrane);GO:0006508(proteolysis);GO:0007275(multicellular organism development);GO:0008233(peptidase activity);GO:0008237(metallopeptidase a…	NA	K07998	EC:3.4.24.-	matrix metallopeptidase 19 [Source:MGI Symbol;Acc:MGI:1927899]	protein_coding;retained_intron	R_MMU_1474244(Extracellular_matrix_organization);R_MMU_1474228(Degradation_of_the_extracellular_matrix)	4.82751	20.6028	0.234314	-2.09349	3.64894e-23	5.56569e-21	down	yes
ENSMUSG00000042428	Mgat3	51274	ENSMUST00000044970	GO:0003830(beta-1,4-mannosylglycoprotein 4-beta-N-acetylglucosaminyltransferase activity);GO:0006487(protein N-linked glycosylation);GO:0008104(protein localization);GO:0016020(membrane);GO:0016740(transferase activity);GO:0030334(regulation of cell migration)	00510(N-Glycan biosynthesis)	K00737	EC:2.4.1.144	mannoside acetylglucosaminyltransferase 3 [Source:MGI Symbol;Acc:MGI:104532]	protein_coding	R_MMU_975576(N_glycan_antennae_elongation_in_the_medial/trans_Golgi);R_MMU_948021(Transport_to_the_Golgi_and_subsequent_modification);R_MMU_597592(Post_translational_protein_modification);R_MMU_392499(Metabolism_of_proteins);R_MMU_446203(Asparagine_N_linked_glycosylation);R_MMU_975574(Reactions_specific_to_the_hybrid_N_glycan_synthesis_pathway)	2.63625	11.2249	0.234857	-2.09015	1.3566e-22	1.89965e-20	down	yes
ENSMUSG00000040010	Slc7a5	133920;133921	ENSMUST00000045557;ENSMUST00000182165	GO:0005764(lysosome);GO:0005765(lysosomal membrane);GO:0005829(cytosol);GO:0005886(plasma membrane);GO:0006865(amino acid transport);GO:0009925(basal plasma membrane);GO:0010629(negative regulation of gene expression);GO:0015171(amino acid transmembrane transporter activity);GO:0015173(aromatic amino acid transmembrane transporter activity);GO:0015175(neutral amino acid transmembrane transporter …	04150(mTOR signaling pathway);05230(Central carbon metabolism in cancer);05230(Central carbon metabolism in cancer)	K13780	NA	solute carrier family 7 (cationic amino acid transporter, y+ system), member 5 [Source:MGI Symbol;Acc:MGI:1298205]	protein_coding;retained_intron	R_MMU_71240(Tryptophan_catabolism);R_MMU_109582(Hemostasis);R_MMU_1430728(Metabolism);R_MMU_425393(Transport_of_inorganic_cations/anions_and_amino_acids/oligopeptides);R_MMU_425407(SLC_mediated_transmembrane_transport);R_MMU_382551(Transport_of_small_molecules);R_MMU_202733(Cell_surface_interactions_at_the_vascular_wall);R_MMU_352230(Amino_acid_transport_across_the_plasma_membrane);R_MMU_71291(Me…	1.35253	5.75307	0.235098	-2.08867	5.78687e-21	6.84805e-19	down	yes
ENSMUSG00000054161	Fam83e	120657;120660;120658	ENSMUST00000129507;ENSMUST00000211124;ENSMUST00000210434	GO:0005575(cellular_component);GO:0007165(signal transduction);GO:0019901(protein kinase binding);GO:0019901(protein kinase binding)	NA	NA	NA	family with sequence similarity 83, member E [Source:MGI Symbol;Acc:MGI:1921063]	protein_coding;processed_transcript;retained_intron	NA	0.673686	2.86552	0.235101	-2.08865	6.94204e-19	6.79763e-17	down	yes
ENSMUSG00000057933	Gsta2	139191;139192;139194;139193	ENSMUST00000034902;ENSMUST00000125479;ENSMUST00000140498;ENSMUST00000129247	GO:0004364(glutathione transferase activity);GO:0005515(protein binding);GO:0005829(cytosol);GO:0006749(glutathione metabolic process);GO:0006805(xenobiotic metabolic process);GO:0009617(response to bacterium);GO:0016740(transferase activity);GO:0035634(response to stilbenoid);GO:0043295(glutathione binding);GO:0043295(glutathione binding)	00480(Glutathione metabolism);00980(Metabolism of xenobiotics by cytochrome P450);00982(Drug metabolism - cytochrome P450);00983(Drug metabolism - other enzymes);01524(Platinum drug resistance);05200(Pathways in cancer);05204(Chemical carcinogenesis);05225(Hepatocellular carcinoma);05418(Fluid shear stress and atherosclerosis);05418(Fluid shear stress and atherosclerosis)	K00799	EC:2.5.1.18	glutathione S-transferase, alpha 2 (Yc2) [Source:MGI Symbol;Acc:MGI:95863]	protein_coding;processed_transcript	NA	1.00336	4.26136	0.235456	-2.08647	3.90806e-15	2.27918e-13	down	yes
ENSMUSG00000079502	Cfap77	74774;74777;74773	ENSMUST00000189711;ENSMUST00000157048;ENSMUST00000189027	GO:0003674(molecular_function);GO:0005575(cellular_component);GO:0008150(biological_process);GO:0008150(biological_process)	NA	NA	NA	cilia and flagella associated protein 77 [Source:MGI Symbol;Acc:MGI:2685669]	protein_coding;nonsense_mediated_decay	NA	1.01027	4.27863	0.23612	-2.08241	6.85078e-19	6.74993e-17	down	yes
ENSMUSG00000060244	Alyref2	14665	ENSMUST00000081527	GO:0003676(nucleic acid binding);GO:0003723(RNA binding)	03013(RNA transport);03015(mRNA surveillance pathway);03040(Spliceosome);05168(Herpes simplex virus 1 infection)	K12881	NA	Aly/REF export factor 2 [Source:MGI Symbol;Acc:MGI:1913144]	protein_coding	NA	1.03731	4.35003	0.238461	-2.06818	1.40437e-15	8.80534e-14	down	yes
ENSMUSG00000047773	Ankfn1	28053;28054	ENSMUST00000208932;ENSMUST00000238273	GO:0001662(behavioral fear response);GO:0003674(molecular_function);GO:0005515(protein binding);GO:0005575(cellular_component);GO:0045475(locomotor rhythm);GO:0050957(equilibrioception);GO:0050957(equilibrioception)	NA	NA	NA	ankyrin-repeat and fibronectin type III domain containing 1 [Source:MGI Symbol;Acc:MGI:2686021]	processed_transcript;protein_coding	NA	0.149621	0.625693	0.239128	-2.06414	4.97255e-14	2.37589e-12	down	yes
ENSMUSG00000002475	Abhd3	65383	ENSMUST00000117828	GO:0004623(phospholipase A2 activity);GO:0005575(cellular_component);GO:0006629(lipid metabolic process);GO:0008126(acetylesterase activity);GO:0008970(phospholipase A1 activity);GO:0016020(membrane);GO:0016021(integral component of membrane);GO:0016787(hydrolase activity);GO:0034338(short-chain carboxylesterase activity);GO:0044255(cellular lipid metabolic process);GO:0046470(phosphatidylcholine…	NA	K13696	NA	abhydrolase domain containing 3 [Source:MGI Symbol;Acc:MGI:2147183]	protein_coding	R_MMU_556833(Metabolism_of_lipids);R_MMU_1430728(Metabolism);R_MMU_1483257(Phospholipid_metabolism);R_MMU_1483191(Synthesis_of_PC);R_MMU_1483206(Glycerophospholipid_biosynthesis)	1.24848	5.17663	0.241176	-2.05184	1.01313e-18	9.68148e-17	down	yes
ENSMUSG00000005220	Corin	101814;101821;101815	ENSMUST00000167460;ENSMUST00000176320;ENSMUST00000005352	GO:0003050(regulation of systemic arterial blood pressure by atrial natriuretic peptide);GO:0004175(endopeptidase activity);GO:0004252(serine-type endopeptidase activity);GO:0005044(scavenger receptor activity);GO:0005515(protein binding);GO:0005576(extracellular region);GO:0005886(plasma membrane);GO:0005887(integral component of plasma membrane);GO:0006508(proteolysis);GO:0006897(endocytosis);G…	NA	K09614	EC:3.4.21.-	corin, serine peptidase [Source:MGI Symbol;Acc:MGI:1349451]	protein_coding;retained_intron	R_MMU_5578768(Physiological_factors);R_MMU_5576891(Cardiac_conduction);R_MMU_397014(Muscle_contraction)	1.25299	5.1899	0.24143	-2.05033	5.82794e-21	6.84805e-19	down	yes
ENSMUSG00000076562	Igkv4-50	110684	ENSMUST00000103363	GO:0002377(immunoglobulin production);GO:0005615(extracellular space);GO:0006955(immune response)	NA	NA	NA	immunoglobulin kappa variable 4-50 [Source:MGI Symbol;Acc:MGI:2685915]	IG_V_gene	NA	195.325	806.528	0.24218	-2.04585	8.00818e-23	1.16545e-20	down	yes
ENSMUSG00000113106	Gm47139	35064	ENSMUST00000221888	NA	NA	NA	NA	predicted gene, 47139 [Source:MGI Symbol;Acc:MGI:6095898]	TEC	NA	1.66343	6.85392	0.242698	-2.04276	2.88087e-19	2.92944e-17	down	yes
ENSMUSG00000076612	Ighg2c	36288;36287	ENSMUST00000195192;ENSMUST00000103416	GO:0002455(humoral immune response mediated by circulating immunoglobulin);GO:0003823(antigen binding);GO:0005615(extracellular space);GO:0006910(phagocytosis, recognition);GO:0006911(phagocytosis, engulfment);GO:0006958(complement activation, classical pathway);GO:0009897(external side of plasma membrane);GO:0016020(membrane);GO:0016021(integral component of membrane);GO:0016064(immunoglobulin m…	NA	NA	NA	immunoglobulin heavy constant gamma 2C [Source:MGI Symbol;Acc:MGI:2686979]	IG_C_gene	R_MMU_977606(Regulation_of_Complement_cascade);R_MMU_2029481(FCGR_activation);R_MMU_2029480(Fcgamma_receptor_(FCGR)_dependent_phagocytosis);R_MMU_173623(Classical_antibody_mediated_complement_activation);R_MMU_166663(Initial_triggering_of_complement);R_MMU_166658(Complement_cascade);R_MMU_2029482(Regulation_of_actin_dynamics_for_phagocytic_cup_formation);R_MMU_168256(Immune_System);R_MMU_166786(C…	5.9234	24.3248	0.243513	-2.03793	5.4623e-21	6.51492e-19	down	yes
ENSMUSG00000049848	Ceacam19	117408	ENSMUST00000052605	GO:0003674(molecular_function);GO:0005575(cellular_component);GO:0008150(biological_process);GO:0016020(membrane);GO:0016021(integral component of membrane)	NA	K16825	NA	carcinoembryonic antigen-related cell adhesion molecule 19 [Source:MGI Symbol;Acc:MGI:2443001]	protein_coding	NA	0.268145	1.0987	0.244057	-2.03471	3.71404e-13	1.52632e-11	down	yes
ENSMUSG00000045573	Penk	90996;90997	ENSMUST00000070375;ENSMUST00000133567	GO:0001515(opioid peptide activity);GO:0001649(osteoblast differentiation);GO:0001662(behavioral fear response);GO:0001666(response to hypoxia);GO:0001964(startle response);GO:0002118(aggressive behavior);GO:0005576(extracellular region);GO:0005886(plasma membrane);GO:0007218(neuropeptide signaling pathway);GO:0007268(chemical synaptic transmission);GO:0007568(aging);GO:0007600(sensory perception…	04080(Neuroactive ligand-receptor interaction);04080(Neuroactive ligand-receptor interaction)	K18832	NA	preproenkephalin [Source:MGI Symbol;Acc:MGI:104629]	protein_coding	R_MMU_373076(Class_A/1_(Rhodopsin_like_receptors));R_MMU_8957275(Post_translational_protein_phosphorylation);R_MMU_375276(Peptide_ligand_binding_receptors);R_MMU_500792(GPCR_ligand_binding);R_MMU_597592(Post_translational_protein_modification);R_MMU_392499(Metabolism_of_proteins);R_MMU_372790(Signaling_by_GPCR);R_MMU_388396(GPCR_downstream_signalling);R_MMU_162582(Signal_Transduction);R_MMU_41859…	0.606326	2.48408	0.244085	-2.03454	1.46076e-13	6.41886e-12	down	yes
ENSMUSG00000114753	Gm34059	43596	ENSMUST00000225697	NA	NA	NA	NA	predicted gene, 34059 [Source:MGI Symbol;Acc:MGI:5593218]	lincRNA	NA	0.569977	2.33189	0.244427	-2.03252	8.3184e-19	8.04602e-17	down	yes
ENSMUSG00000067704	Wfdc13	82697	ENSMUST00000088260	GO:0004867(serine-type endopeptidase inhibitor activity);GO:0005576(extracellular region);GO:0005615(extracellular space);GO:0010466(negative regulation of peptidase activity);GO:0010951(negative regulation of endopeptidase activity);GO:0019731(antibacterial humoral response);GO:0030414(peptidase inhibitor activity);GO:0045087(innate immune response)	NA	NA	NA	WAP four-disulfide core domain 13 [Source:MGI Symbol;Acc:MGI:3582777]	protein_coding	NA	1.00749	4.09365	0.24611	-2.02262	6.29481e-14	2.92759e-12	down	yes
ENSMUSG00000024353	Mzb1	66220;66222;66223	ENSMUST00000025211;ENSMUST00000235707;ENSMUST00000237462	GO:0002642(positive regulation of immunoglobulin biosynthetic process);GO:0003674(molecular_function);GO:0005515(protein binding);GO:0005576(extracellular region);GO:0005737(cytoplasm);GO:0005783(endoplasmic reticulum);GO:0005788(endoplasmic reticulum lumen);GO:0008284(positive regulation of cell population proliferation);GO:0030888(regulation of B cell proliferation);GO:0033622(integrin activati…	NA	NA	NA	marginal zone B and B1 cell-specific protein 1 [Source:MGI Symbol;Acc:MGI:1917066]	protein_coding;retained_intron	NA	36.4545	147.36	0.247383	-2.01518	3.84206e-22	5.03691e-20	down	yes
ENSMUSG00000096464	Ighv2-2	36343	ENSMUST00000103443	GO:0003823(antigen binding);GO:0006910(phagocytosis, recognition);GO:0006911(phagocytosis, engulfment);GO:0006958(complement activation, classical pathway);GO:0009897(external side of plasma membrane);GO:0034987(immunoglobulin receptor binding);GO:0042571(immunoglobulin complex, circulating);GO:0042742(defense response to bacterium);GO:0045087(innate immune response);GO:0050853(B cell receptor si…	NA	NA	NA	immunoglobulin heavy variable 2-2 [Source:MGI Symbol;Acc:MGI:4439894]	IG_V_gene	NA	98.5982	398.389	0.247493	-2.01454	4.65372e-22	5.95338e-20	down	yes
ENSMUSG00000095079	Igha	36283;36284	ENSMUST00000194738;ENSMUST00000178282	GO:0002385(mucosal immune response);GO:0002455(humoral immune response mediated by circulating immunoglobulin);GO:0003823(antigen binding);GO:0006910(phagocytosis, recognition);GO:0006911(phagocytosis, engulfment);GO:0006958(complement activation, classical pathway);GO:0009897(external side of plasma membrane);GO:0016064(immunoglobulin mediated immune response);GO:0034987(immunoglobulin receptor …	NA	NA	NA	immunoglobulin heavy constant alpha [Source:MGI Symbol;Acc:MGI:96444]	IG_C_gene	R_MMU_5653656(Vesicle_mediated_transport);R_MMU_109582(Hemostasis);R_MMU_2173782(Binding_and_Uptake_of_Ligands_by_Scavenger_Receptors);R_MMU_202733(Cell_surface_interactions_at_the_vascular_wall);R_MMU_2168880(Scavenging_of_heme_from_plasma)	553.696	2234.63	0.24778	-2.01287	2.22632e-22	3.01847e-20	down	yes
ENSMUSG00000063903	Klk1	119928	ENSMUST00000075162	GO:0003073(regulation of systemic arterial blood pressure);GO:0004175(endopeptidase activity);GO:0004252(serine-type endopeptidase activity);GO:0005615(extracellular space);GO:0006508(proteolysis);GO:0008233(peptidase activity);GO:0008236(serine-type peptidase activity);GO:0016787(hydrolase activity);GO:0016811(hydrolase activity, acting on carbon-nitrogen (but not peptide) bonds, in linear amide…	04614(Renin-angiotensin system);04961(Endocrine and other factor-regulated calcium reabsorption)	K01325	EC:3.4.21.35	kallikrein 1 [Source:MGI Symbol;Acc:MGI:102850]	protein_coding	R_MMU_1474244(Extracellular_matrix_organization);R_MMU_1474228(Degradation_of_the_extracellular_matrix);R_MMU_1592389(Activation_of_Matrix_Metalloproteinases)	1.34175	5.40837	0.248087	-2.01108	4.31573e-15	2.49856e-13	down	yes
ENSMUSG00000034394	Lif	22844;22845;22846	ENSMUST00000066283;ENSMUST00000154927;ENSMUST00000040750	GO:0001974(blood vessel remodeling);GO:0005102(signaling receptor binding);GO:0005125(cytokine activity);GO:0005146(leukemia inhibitory factor receptor binding);GO:0005576(extracellular region);GO:0005615(extracellular space);GO:0005829(cytosol);GO:0006955(immune response);GO:0007165(signal transduction);GO:0007260(tyrosine phosphorylation of STAT protein);GO:0007566(embryo implantation);GO:00080…	04060(Cytokine-cytokine receptor interaction);04550(Signaling pathways regulating pluripotency of stem cells);04630(Jak-STAT signaling pathway);04668(TNF signaling pathway);04668(TNF signaling pathway)	K05419	NA	leukemia inhibitory factor [Source:MGI Symbol;Acc:MGI:96787]	protein_coding;processed_transcript	R_MMU_449147(Signaling_by_Interleukins);R_MMU_6783589(Interleukin_6_family_signaling);R_MMU_168256(Immune_System);R_MMU_1280215(Cytokine_Signaling_in_Immune_system);R_MMU_6788467(IL_6_type_cytokine_receptor_ligand_interactions)	0.418826	1.68564	0.248467	-2.00887	4.35096e-16	2.92455e-14	down	yes
ENSMUSG00000086868	Gm15883	118108	ENSMUST00000153562	NA	NA	NA	NA	predicted gene 15883 [Source:MGI Symbol;Acc:MGI:3801875]	antisense	NA	2.52217	10.1334	0.248896	-2.00638	3.46599e-19	3.45793e-17	down	yes
ENSMUSG00000052117	D630039A03Rik	92863	ENSMUST00000063816	GO:0003674(molecular_function);GO:0005575(cellular_component);GO:0008150(biological_process)	NA	NA	NA	RIKEN cDNA D630039A03 gene [Source:MGI Symbol;Acc:MGI:2442889]	protein_coding	NA	2.63731	10.5267	0.250535	-1.99691	3.3355e-20	3.67438e-18	down	yes
ENSMUSG00000074634	Tmem267	42319;42318;42317;42315;42316	ENSMUST00000178948;ENSMUST00000099147;ENSMUST00000177361;ENSMUST00000176171;ENSMUST00000223912	GO:0016020(membrane);GO:0016021(integral component of membrane);GO:0016021(integral component of membrane)	NA	NA	NA	transmembrane protein 267 [Source:MGI Symbol;Acc:MGI:3648543]	protein_coding;retained_intron	NA	1.71909	6.8324	0.251609	-1.99074	1.88502e-20	2.13586e-18	down	yes
ENSMUSG00000006269	Atp6v1b1	111400;111402;111405;111403;111404	ENSMUST00000006431;ENSMUST00000206911;ENSMUST00000206052;ENSMUST00000205763;ENSMUST00000206652	GO:0001503(ossification);GO:0003091(renal water homeostasis);GO:0003096(renal sodium ion transport);GO:0005524(ATP binding);GO:0005737(cytoplasm);GO:0005829(cytosol);GO:0005902(microvillus);GO:0006693(prostaglandin metabolic process);GO:0006811(ion transport);GO:0006885(regulation of pH);GO:0007588(excretion);GO:0007605(sensory perception of sound);GO:0008021(synaptic vesicle);GO:0010468(regulati…	00190(Oxidative phosphorylation);04145(Phagosome);04150(mTOR signaling pathway);04721(Synaptic vesicle cycle);04966(Collecting duct acid secretion);05165(Human papillomavirus infection);05323(Rheumatoid arthritis);05323(Rheumatoid arthritis)	K02147	NA	ATPase, H+ transporting, lysosomal V1 subunit B1 [Source:MGI Symbol;Acc:MGI:103285]	protein_coding;retained_intron	R_MMU_1222556(ROS_and_RNS_production_in_phagocytes);R_MMU_2262752(Cellular_responses_to_stress);R_MMU_74752(Signaling_by_Insulin_receptor);R_MMU_9711097(Cellular_response_to_starvation);R_MMU_8953897(Cellular_responses_to_external_stimuli);R_MMU_9639288(Amino_acids_regulate_mTORC1);R_MMU_382551(Transport_of_small_molecules);R_MMU_917977(Transferrin_endocytosis_and_recycling);R_MMU_168256(Immune_S…	0.421987	1.6739	0.252099	-1.98794	7.5452e-16	4.92549e-14	down	yes
ENSMUSG00000095007	Igkv12-41	110693	ENSMUST00000103369	GO:0002250(adaptive immune response);GO:0002376(immune system process);GO:0002377(immunoglobulin production);GO:0005615(extracellular space);GO:0006955(immune response);GO:0019814(immunoglobulin complex)	NA	NA	NA	immunoglobulin kappa chain variable 12-41 [Source:MGI Symbol;Acc:MGI:4439772]	IG_V_gene	NA	235.159	932.735	0.252117	-1.98783	9.0098e-22	1.12537e-19	down	yes
ENSMUSG00000096452	Ighv1-77	36597;36598	ENSMUST00000170551;ENSMUST00000198777	GO:0003823(antigen binding);GO:0006910(phagocytosis, recognition);GO:0006911(phagocytosis, engulfment);GO:0006958(complement activation, classical pathway);GO:0009897(external side of plasma membrane);GO:0034987(immunoglobulin receptor binding);GO:0042571(immunoglobulin complex, circulating);GO:0042742(defense response to bacterium);GO:0045087(innate immune response);GO:0050853(B cell receptor si…	NA	NA	NA	immunoglobulin heavy variable 1-77 [Source:MGI Symbol;Acc:MGI:4439670]	IG_V_gene	R_MMU_2871809(FCERI_mediated_Ca+2_mobilization);R_MMU_977606(Regulation_of_Complement_cascade);R_MMU_5653656(Vesicle_mediated_transport);R_MMU_2029481(FCGR_activation);R_MMU_2029480(Fcgamma_receptor_(FCGR)_dependent_phagocytosis);R_MMU_983705(Signaling_by_the_B_Cell_Receptor_(BCR));R_MMU_109582(Hemostasis);R_MMU_173623(Classical_antibody_mediated_complement_activation);R_MMU_166663(Initial_trigge…	2.98076	11.7697	0.253258	-1.98132	9.0079e-14	4.09434e-12	down	yes
ENSMUSG00000038522	Mfsd4b1	17378;17382	ENSMUST00000163705;ENSMUST00000239109	GO:0005355(glucose transmembrane transporter activity);GO:0005575(cellular_component);GO:0005886(plasma membrane);GO:0006811(ion transport);GO:0006814(sodium ion transport);GO:0008643(carbohydrate transport);GO:0015293(symporter activity);GO:0016020(membrane);GO:0016021(integral component of membrane);GO:0016324(apical plasma membrane);GO:0022857(transmembrane transporter activity);GO:0055085(tra…	NA	K08175	NA	major facilitator superfamily domain containing 4B1 [Source:MGI Symbol;Acc:MGI:2143575]	protein_coding;retained_intron	NA	0.34064	1.33332	0.255483	-1.9687	4.20833e-14	2.05405e-12	down	yes
ENSMUSG00000051043	Gprc5c	30216;30218;30214;30217	ENSMUST00000053361;ENSMUST00000136785;ENSMUST00000122967;ENSMUST00000021071	GO:0004930(G protein-coupled receptor activity);GO:0005886(plasma membrane);GO:0007165(signal transduction);GO:0007186(G protein-coupled receptor signaling pathway);GO:0016020(membrane);GO:0016021(integral component of membrane);GO:0016021(integral component of membrane)	NA	K04620	NA	G protein-coupled receptor, family C, group 5, member C [Source:MGI Symbol;Acc:MGI:1917605]	protein_coding	NA	0.882501	3.45237	0.255622	-1.96792	1.31649e-18	1.24306e-16	down	yes
ENSMUSG00000055333	Fat2	24869	ENSMUST00000068853	GO:0005509(calcium ion binding);GO:0005794(Golgi apparatus);GO:0005886(plasma membrane);GO:0005912(adherens junction);GO:0007155(cell adhesion);GO:0007156(homophilic cell adhesion via plasma membrane adhesion molecules);GO:0010631(epithelial cell migration);GO:0016020(membrane);GO:0016021(integral component of membrane);GO:0030054(cell junction);GO:0031589(cell-substrate adhesion);GO:0098609(cell…	NA	K16506	NA	FAT atypical cadherin 2 [Source:MGI Symbol;Acc:MGI:2685369]	protein_coding	NA	0.122939	0.480285	0.255971	-1.96595	1.28526e-15	8.09051e-14	down	yes
ENSMUSG00000019767	Ccdc170	16077;16081	ENSMUST00000138112;ENSMUST00000157064	GO:0000226(microtubule cytoskeleton organization);GO:0005794(Golgi apparatus);GO:0008017(microtubule binding);GO:0036064(ciliary basal body);GO:0036064(ciliary basal body)	NA	NA	NA	coiled-coil domain containing 170 [Source:MGI Symbol;Acc:MGI:2685067]	protein_coding;processed_transcript	NA	1.04191	4.06514	0.256305	-1.96407	3.20136e-18	2.91858e-16	down	yes
ENSMUSG00000032446	Eomes	141964;141963	ENSMUST00000035020;ENSMUST00000111763	GO:0000122(negative regulation of transcription by RNA polymerase II);GO:0000790(nuclear chromatin);GO:0000977(RNA polymerase II regulatory region sequence-specific DNA binding);GO:0001102(RNA polymerase II activating transcription factor binding);GO:0001227(DNA-binding transcription repressor activity, RNA polymerase II-specific);GO:0001228(DNA-binding transcription activator activity, RNA polym…	NA	K10173	NA	eomesodermin [Source:MGI Symbol;Acc:MGI:1201683]	protein_coding	NA	0.355739	1.378	0.258156	-1.95368	1.83987e-14	9.56911e-13	down	yes
ENSMUSG00000032591	Mst1	141072	ENSMUST00000035211	GO:0004252(serine-type endopeptidase activity);GO:0005576(extracellular region);GO:0005615(extracellular space);GO:0005737(cytoplasm);GO:0005773(vacuole);GO:0006508(proteolysis);GO:0007283(spermatogenesis);GO:0007566(embryo implantation);GO:0010628(positive regulation of gene expression);GO:0010758(regulation of macrophage chemotaxis);GO:0019899(enzyme binding);GO:0030317(flagellated sperm motili…	NA	NA	NA	macrophage stimulating 1 (hepatocyte growth factor-like) [Source:MGI Symbol;Acc:MGI:96080]	protein_coding	R_MMU_8852405(Signaling_by_MST1);R_MMU_9006934(Signaling_by_Receptor_Tyrosine_Kinases);R_MMU_162582(Signal_Transduction)	0.440406	1.70411	0.258438	-1.95211	1.09915e-12	4.1913e-11	down	yes
ENSMUSG00000094951	Ighv5-6	36349	ENSMUST00000103446	GO:0003823(antigen binding);GO:0006910(phagocytosis, recognition);GO:0006911(phagocytosis, engulfment);GO:0006958(complement activation, classical pathway);GO:0009897(external side of plasma membrane);GO:0034987(immunoglobulin receptor binding);GO:0042571(immunoglobulin complex, circulating);GO:0042742(defense response to bacterium);GO:0045087(innate immune response);GO:0050853(B cell receptor si…	NA	NA	NA	immunoglobulin heavy variable 5-6 [Source:MGI Symbol;Acc:MGI:4439815]	IG_V_gene	R_MMU_2871809(FCERI_mediated_Ca+2_mobilization);R_MMU_977606(Regulation_of_Complement_cascade);R_MMU_5653656(Vesicle_mediated_transport);R_MMU_2029481(FCGR_activation);R_MMU_2029480(Fcgamma_receptor_(FCGR)_dependent_phagocytosis);R_MMU_983705(Signaling_by_the_B_Cell_Receptor_(BCR));R_MMU_109582(Hemostasis);R_MMU_173623(Classical_antibody_mediated_complement_activation);R_MMU_166663(Initial_trigge…	27.9718	107.8	0.259478	-1.94632	1.05121e-19	1.09326e-17	down	yes
ENSMUSG00000000567	Sox9	30123	ENSMUST00000000579	GO:0000122(negative regulation of transcription by RNA polymerase II);GO:0000976(transcription regulatory region sequence-specific DNA binding);GO:0000978(RNA polymerase II cis-regulatory region sequence-specific DNA binding);GO:0000981(DNA-binding transcription factor activity, RNA polymerase II-specific);GO:0000987(cis-regulatory region sequence-specific DNA binding);GO:0001228(DNA-binding tran…	04024(cAMP signaling pathway)	K18435	NA	SRY (sex determining region Y)-box 9 [Source:MGI Symbol;Acc:MGI:98371]	protein_coding	R_MMU_3769402(Deactivation_of_the_beta_catenin_transactivating_complex);R_MMU_73857(RNA_Polymerase_II_Transcription);R_MMU_8878166(Transcriptional_regulation_by_RUNX2);R_MMU_212436(Generic_Transcription_Pathway);R_MMU_201681(TCF_dependent_signaling_in_response_to_WNT);R_MMU_195721(Signaling_by_WNT);R_MMU_162582(Signal_Transduction);R_MMU_74160(Gene_expression_(Transcription))	0.408014	1.57212	0.259532	-1.94602	5.33549e-15	3.04449e-13	down	yes
ENSMUSG00000098814	Igkv19-93	110606;110605	ENSMUST00000196863;ENSMUST00000183936	GO:0002377(immunoglobulin production);GO:0005615(extracellular space);GO:0006955(immune response);GO:0006955(immune response)	NA	NA	NA	immunoglobulin kappa chain variable 19-93 [Source:MGI Symbol;Acc:MGI:107617]	IG_V_gene	R_MMU_2871809(FCERI_mediated_Ca+2_mobilization);R_MMU_977606(Regulation_of_Complement_cascade);R_MMU_5653656(Vesicle_mediated_transport);R_MMU_2029481(FCGR_activation);R_MMU_2029480(Fcgamma_receptor_(FCGR)_dependent_phagocytosis);R_MMU_983705(Signaling_by_the_B_Cell_Receptor_(BCR));R_MMU_109582(Hemostasis);R_MMU_173623(Classical_antibody_mediated_complement_activation);R_MMU_166663(Initial_trigge…	68.52	262.857	0.260674	-1.93968	1.47204e-20	1.70446e-18	down	yes
ENSMUSG00000036813	Entpd8	74091;74096;74089;74090;74093	ENSMUST00000114380;ENSMUST00000127384;ENSMUST00000135004;ENSMUST00000044078;ENSMUST00000149470	GO:0000166(nucleotide binding);GO:0005524(ATP binding);GO:0005886(plasma membrane);GO:0009124(nucleoside monophosphate biosynthetic process);GO:0009133(nucleoside diphosphate biosynthetic process);GO:0016020(membrane);GO:0016021(integral component of membrane);GO:0016787(hydrolase activity);GO:0017110(nucleoside-diphosphatase activity);GO:0017111(nucleoside-triphosphatase activity);GO:0046872(met…	00230(Purine metabolism);00240(Pyrimidine metabolism);05169(Epstein-Barr virus infection);05169(Epstein-Barr virus infection)	K01510	EC:3.6.1.5	ectonucleoside triphosphate diphosphohydrolase 8 [Source:MGI Symbol;Acc:MGI:1919340]	protein_coding;retained_intron	R_MMU_1430728(Metabolism);R_MMU_8956319(Nucleobase_catabolism);R_MMU_8850843(Phosphate_bond_hydrolysis_by_NTPDase_proteins);R_MMU_15869(Metabolism_of_nucleotides)	0.464439	1.77312	0.261933	-1.93273	4.40283e-13	1.78169e-11	down	yes
ENSMUSG00000018907	Alox12e	26254;26257;26256;26255	ENSMUST00000019051;ENSMUST00000149060;ENSMUST00000139899;ENSMUST00000123752	GO:0004052(arachidonate 12(S)-lipoxygenase activity);GO:0005506(iron ion binding);GO:0005515(protein binding);GO:0005737(cytoplasm);GO:0005829(cytosol);GO:0005886(plasma membrane);GO:0006629(lipid metabolic process);GO:0006631(fatty acid metabolic process);GO:0016165(linoleate 13S-lipoxygenase activity);GO:0016491(oxidoreductase activity);GO:0016702(oxidoreductase activity, acting on single donor…	00590(Arachidonic acid metabolism);01523(Antifolate resistance);04726(Serotonergic synapse);04750(Inflammatory mediator regulation of TRP channels);04750(Inflammatory mediator regulation of TRP channels)	K00458	EC:1.13.11.31	arachidonate lipoxygenase, epidermal [Source:MGI Symbol;Acc:MGI:1274790]	protein_coding;retained_intron	NA	1.09776	4.18863	0.26208	-1.93192	5.88221e-17	4.43979e-15	down	yes
ENSMUSG00000035095	Fam167a	46755;46756	ENSMUST00000121288;ENSMUST00000128313	GO:0008150(biological_process);GO:0008150(biological_process)	NA	NA	NA	family with sequence similarity 167, member A [Source:MGI Symbol;Acc:MGI:3606565]	protein_coding;retained_intron	NA	2.85171	10.862	0.262539	-1.92939	1.05446e-19	1.09326e-17	down	yes
ENSMUSG00000039774	Galnt12	92533	ENSMUST00000045041	GO:0000139(Golgi membrane);GO:0003674(molecular_function);GO:0004653(polypeptide N-acetylgalactosaminyltransferase activity);GO:0005794(Golgi apparatus);GO:0006486(protein glycosylation);GO:0008150(biological_process);GO:0016020(membrane);GO:0016021(integral component of membrane);GO:0016740(transferase activity);GO:0016757(transferase activity, transferring glycosyl groups);GO:0030246(carbohydra…	00512(Mucin type O-glycan biosynthesis)	K00710	EC:2.4.1.41	polypeptide N-acetylgalactosaminyltransferase 12 [Source:MGI Symbol;Acc:MGI:2444664]	protein_coding	R_MMU_913709(O_linked_glycosylation_of_mucins);R_MMU_5173105(O_linked_glycosylation);R_MMU_597592(Post_translational_protein_modification);R_MMU_392499(Metabolism_of_proteins)	1.05751	4.00401	0.264112	-1.92078	5.06912e-16	3.37863e-14	down	yes
ENSMUSG00000073208	Speer4c	99088	ENSMUST00000095005	GO:0003674(molecular_function);GO:0005575(cellular_component);GO:0008150(biological_process)	NA	NA	NA	spermatogenesis associated glutamate (E)-rich protein 4C [Source:MGI Symbol;Acc:MGI:1914023]	protein_coding	NA	4.09823	15.5044	0.264326	-1.91961	5.06667e-18	4.46514e-16	down	yes
ENSMUSG00000020686	Gas2l2	27589	ENSMUST00000052521	GO:0000226(microtubule cytoskeleton organization);GO:0001578(microtubule bundle formation);GO:0001725(stress fiber);GO:0001965(G-protein alpha-subunit binding);GO:0005515(protein binding);GO:0005737(cytoplasm);GO:0005856(cytoskeleton);GO:0005874(microtubule);GO:0005884(actin filament);GO:0005886(plasma membrane);GO:0007026(negative regulation of microtubule depolymerization);GO:0008017(microtubul…	NA	NA	NA	growth arrest-specific 2 like 2 [Source:MGI Symbol;Acc:MGI:3652048]	protein_coding	NA	0.806213	3.03467	0.265668	-1.91231	2.7717e-15	1.65291e-13	down	yes
ENSMUSG00000050677	Ccdc96	100584	ENSMUST00000060100	GO:0003674(molecular_function);GO:0005575(cellular_component);GO:0005737(cytoplasm);GO:0005815(microtubule organizing center);GO:0005856(cytoskeleton);GO:0008150(biological_process)	NA	NA	NA	coiled-coil domain containing 96 [Source:MGI Symbol;Acc:MGI:1913967]	protein_coding	NA	1.39787	5.25644	0.265934	-1.91086	5.72367e-18	4.98872e-16	down	yes
ENSMUSG00000027938	Creb3l4	87170;87171	ENSMUST00000029547;ENSMUST00000107369	GO:0000139(Golgi membrane);GO:0000977(RNA polymerase II regulatory region sequence-specific DNA binding);GO:0001228(DNA-binding transcription activator activity, RNA polymerase II-specific);GO:0002079(inner acrosomal membrane);GO:0003677(DNA binding);GO:0003700(DNA-binding transcription factor activity);GO:0005634(nucleus);GO:0005654(nucleoplasm);GO:0005739(mitochondrion);GO:0005783(endoplasmic r…	04022(cGMP-PKG signaling pathway);04024(cAMP signaling pathway);04151(PI3K-Akt signaling pathway);04152(AMPK signaling pathway);04211(Longevity regulating pathway);04261(Adrenergic signaling in cardiomyocytes);04668(TNF signaling pathway);04714(Thermogenesis);04725(Cholinergic synapse);04728(Dopaminergic synapse);04911(Insulin secretion);04915(Estrogen signaling pathway);04916(Melanogenesis);0491…	K09048	NA	cAMP responsive element binding protein 3-like 4 [Source:MGI Symbol;Acc:MGI:1916603]	protein_coding	NA	0.930432	3.49408	0.266288	-1.90894	3.46122e-14	1.72658e-12	down	yes
ENSMUSG00000094561	Ighv1-22	36482	ENSMUST00000103507	GO:0003823(antigen binding);GO:0006910(phagocytosis, recognition);GO:0006911(phagocytosis, engulfment);GO:0006958(complement activation, classical pathway);GO:0009897(external side of plasma membrane);GO:0034987(immunoglobulin receptor binding);GO:0042571(immunoglobulin complex, circulating);GO:0042742(defense response to bacterium);GO:0045087(innate immune response);GO:0050853(B cell receptor si…	NA	NA	NA	immunoglobulin heavy variable 1-22 [Source:MGI Symbol;Acc:MGI:4439784]	IG_V_gene	R_MMU_2871809(FCERI_mediated_Ca+2_mobilization);R_MMU_977606(Regulation_of_Complement_cascade);R_MMU_5653656(Vesicle_mediated_transport);R_MMU_2029481(FCGR_activation);R_MMU_2029480(Fcgamma_receptor_(FCGR)_dependent_phagocytosis);R_MMU_983705(Signaling_by_the_B_Cell_Receptor_(BCR));R_MMU_109582(Hemostasis);R_MMU_173623(Classical_antibody_mediated_complement_activation);R_MMU_166663(Initial_trigge…	14.8257	55.389	0.267666	-1.9015	7.05214e-18	6.04692e-16	down	yes
ENSMUSG00000030162	Olr1	114396;114400	ENSMUST00000032265;ENSMUST00000162815	GO:0002376(immune system process);GO:0005041(low-density lipoprotein particle receptor activity);GO:0005576(extracellular region);GO:0005654(nucleoplasm);GO:0005886(plasma membrane);GO:0006897(endocytosis);GO:0006954(inflammatory response);GO:0007155(cell adhesion);GO:0007159(leukocyte cell-cell adhesion);GO:0008219(cell death);GO:0010629(negative regulation of gene expression);GO:0016020(membran…	03320(PPAR signaling pathway);04145(Phagosome);04145(Phagosome)	K08763	NA	oxidized low density lipoprotein (lectin-like) receptor 1 [Source:MGI Symbol;Acc:MGI:1261434]	protein_coding	R_MMU_109582(Hemostasis);R_MMU_202733(Cell_surface_interactions_at_the_vascular_wall);R_MMU_168256(Immune_System);R_MMU_6798695(Neutrophil_degranulation);R_MMU_168249(Innate_Immune_System)	1.24084	4.62218	0.268454	-1.89725	1.95321e-17	1.57278e-15	down	yes
ENSMUSG00000029026	Trp73	98192;98193;98199	ENSMUST00000239448;ENSMUST00000133533;ENSMUST00000139634	GO:0000187(activation of MAPK activity);GO:0000785(chromatin);GO:0000976(transcription regulatory region sequence-specific DNA binding);GO:0000978(RNA polymerase II cis-regulatory region sequence-specific DNA binding);GO:0000981(DNA-binding transcription factor activity, RNA polymerase II-specific);GO:0001228(DNA-binding transcription activator activity, RNA polymerase II-specific);GO:0001822(kid…	04115(p53 signaling pathway);04390(Hippo signaling pathway);04722(Neurotrophin signaling pathway);05162(Measles);05162(Measles)	K10148	NA	transformation related protein 73 [Source:MGI Symbol;Acc:MGI:1336991]	protein_coding	R_MMU_73857(RNA_Polymerase_II_Transcription);R_MMU_212436(Generic_Transcription_Pathway);R_MMU_3700989(Transcriptional_Regulation_by_TP53);R_MMU_5633007(Regulation_of_TP53_Activity);R_MMU_6804759(Regulation_of_TP53_Activity_through_Association_with_Co_factors);R_MMU_74160(Gene_expression_(Transcription));R_MMU_8878171(Transcriptional_regulation_by_RUNX1);R_MMU_8939236(RUNX1_regulates_transcriptio…	0.908555	3.35132	0.271104	-1.88308	1.66497e-17	1.35074e-15	down	yes
ENSMUSG00000076523	Igkv15-103	110584	ENSMUST00000103324	GO:0002377(immunoglobulin production);GO:0005615(extracellular space);GO:0006955(immune response)	NA	NA	NA	immunoglobulin kappa chain variable 15-103 [Source:MGI Symbol;Acc:MGI:96513]	IG_V_gene	NA	198.317	731.37	0.271159	-1.88279	7.45066e-20	7.9322e-18	down	yes
ENSMUSG00000009092	Derl3	18930;18937;18935;18934;18933;18936;18931;18932	ENSMUST00000009236;ENSMUST00000220190;ENSMUST00000218718;ENSMUST00000218932;ENSMUST00000218506;ENSMUST00000219994;ENSMUST00000217811;ENSMUST00000219568	GO:0000839(Hrd1p ubiquitin ligase ERAD-L complex);GO:0005783(endoplasmic reticulum);GO:0005785(signal recognition particle receptor complex);GO:0005789(endoplasmic reticulum membrane);GO:0016020(membrane);GO:0016021(integral component of membrane);GO:0018279(protein N-linked glycosylation via asparagine);GO:0030176(integral component of endoplasmic reticulum membrane);GO:0030433(ubiquitin-depende…	04141(Protein processing in endoplasmic reticulum);04141(Protein processing in endoplasmic reticulum)	K13989	NA	Der1-like domain family, member 3 [Source:MGI Symbol;Acc:MGI:1917627]	protein_coding;retained_intron;processed_transcript	R_MMU_382556(ABC_family_proteins_mediated_transport);R_MMU_382551(Transport_of_small_molecules)	6.76159	24.8014	0.272629	-1.87499	9.23943e-19	8.88273e-17	down	yes
ENSMUSG00000051076	Vtcn1	88226	ENSMUST00000054791	GO:0001562(response to protozoan);GO:0001817(regulation of cytokine production);GO:0002250(adaptive immune response);GO:0002376(immune system process);GO:0005102(signaling receptor binding);GO:0005886(plasma membrane);GO:0009897(external side of plasma membrane);GO:0016020(membrane);GO:0031225(anchored component of membrane);GO:0032609(interferon-gamma production);GO:0032633(interleukin-4 product…	04514(Cell adhesion molecules (CAMs))	K06747	NA	V-set domain containing T cell activation inhibitor 1 [Source:MGI Symbol;Acc:MGI:3039619]	protein_coding	NA	1.03276	3.78597	0.272787	-1.87415	1.18223e-15	7.47161e-14	down	yes
ENSMUSG00000061718	Ppp1r1b	28689;28693;28691;28696;28694	ENSMUST00000078694;ENSMUST00000132443;ENSMUST00000150762;ENSMUST00000152525;ENSMUST00000147415	GO:0001975(response to amphetamine);GO:0004864(protein phosphatase inhibitor activity);GO:0004865(protein serine/threonine phosphatase inhibitor activity);GO:0005634(nucleus);GO:0005737(cytoplasm);GO:0006351(transcription, DNA-templated);GO:0007165(signal transduction);GO:0007613(memory);GO:0007621(negative regulation of female receptivity);GO:0007626(locomotory behavior);GO:0008542(visual learni…	04024(cAMP signaling pathway);04728(Dopaminergic synapse);05030(Cocaine addiction);05031(Amphetamine addiction);05034(Alcoholism);05034(Alcoholism)	K15494	NA	protein phosphatase 1, regulatory inhibitor subunit 1B [Source:MGI Symbol;Acc:MGI:94860]	protein_coding;retained_intron;processed_transcript	R_MMU_372790(Signaling_by_GPCR);R_MMU_388396(GPCR_downstream_signalling);R_MMU_180024(DARPP_32_events);R_MMU_162582(Signal_Transduction);R_MMU_418594(G_alpha_(i)_signalling_events);R_MMU_111885(Opioid_Signalling)	1.70267	6.23484	0.273089	-1.87255	2.67796e-17	2.10299e-15	down	yes
ENSMUSG00000011034	Slc5a1	100218	ENSMUST00000011178	GO:0000017(alpha-glucoside transport);GO:0005355(glucose transmembrane transporter activity);GO:0005372(water transmembrane transporter activity);GO:0005412(glucose:sodium symporter activity);GO:0005769(early endosome);GO:0005886(plasma membrane);GO:0005911(cell-cell junction);GO:0010035(response to inorganic substance);GO:0015151(alpha-glucoside transmembrane transporter activity);GO:0016020(mem…	04973(Carbohydrate digestion and absorption);04976(Bile secretion);04978(Mineral absorption)	K14158	NA	solute carrier family 5 (sodium/glucose cotransporter), member 1 [Source:MGI Symbol;Acc:MGI:107678]	protein_coding	R_MMU_8963676(Intestinal_absorption);R_MMU_425407(SLC_mediated_transmembrane_transport);R_MMU_382551(Transport_of_small_molecules);R_MMU_189200(Cellular_hexose_transport);R_MMU_8981373(Intestinal_hexose_absorption);R_MMU_8963743(Digestion_and_absorption)	1.84339	6.74571	0.273269	-1.8716	4.54011e-18	4.02345e-16	down	yes
ENSMUSG00000048138	Dmrt2	71090	ENSMUST00000053068	GO:0000977(RNA polymerase II regulatory region sequence-specific DNA binding);GO:0001228(DNA-binding transcription activator activity, RNA polymerase II-specific);GO:0003677(DNA binding);GO:0003700(DNA-binding transcription factor activity);GO:0005634(nucleus);GO:0006355(regulation of transcription, DNA-templated);GO:0014807(regulation of somitogenesis);GO:0043565(sequence-specific DNA binding);G…	NA	K19489	NA	doublesex and mab-3 related transcription factor 2 [Source:MGI Symbol;Acc:MGI:1330307]	protein_coding	NA	0.746771	2.73188	0.273354	-1.87116	4.18406e-14	2.04851e-12	down	yes
ENSMUSG00000063522	Ly6m	50196;50197	ENSMUST00000190826;ENSMUST00000077004	GO:0005886(plasma membrane);GO:0016020(membrane);GO:0030550(acetylcholine receptor inhibitor activity);GO:0031225(anchored component of membrane);GO:2000272(negative regulation of signaling receptor activity);GO:2000272(negative regulation of signaling receptor activity)	NA	K06846	NA	lymphocyte antigen 6 complex, locus M [Source:MGI Symbol;Acc:MGI:1914288]	processed_transcript;protein_coding	NA	1.26056	4.59727	0.274198	-1.86671	9.35685e-17	6.83998e-15	down	yes
ENSMUSG00000035818	Plekhs1	72726;72725;72724;72723;72728;72727	ENSMUST00000224840;ENSMUST00000225909;ENSMUST00000178590;ENSMUST00000039666;ENSMUST00000225008;ENSMUST00000225391	GO:0003674(molecular_function);GO:0005575(cellular_component);GO:0008150(biological_process);GO:0008150(biological_process)	NA	NA	NA	pleckstrin homology domain containing, family S member 1 [Source:MGI Symbol;Acc:MGI:2443041]	retained_intron;protein_coding;processed_transcript	NA	0.439424	1.59171	0.276071	-1.85689	1.6975e-13	7.3572e-12	down	yes
ENSMUSG00000052271	Bhlha15	107019	ENSMUST00000060747	GO:0000977(RNA polymerase II regulatory region sequence-specific DNA binding);GO:0001228(DNA-binding transcription activator activity, RNA polymerase II-specific);GO:0003677(DNA binding);GO:0005634(nucleus);GO:0006355(regulation of transcription, DNA-templated);GO:0006851(mitochondrial calcium ion transmembrane transport);GO:0007030(Golgi organization);GO:0007186(G protein-coupled receptor signal…	04950(Maturity onset diabetes of the young)	K08040	NA	basic helix-loop-helix family, member a15 [Source:MGI Symbol;Acc:MGI:891976]	protein_coding	NA	1.23393	4.46736	0.27621	-1.85616	1.00109e-16	7.25127e-15	down	yes
ENSMUSG00000071392	Ect2l	16548;16553;16552;16551;16549;16547	ENSMUST00000207827;ENSMUST00000207148;ENSMUST00000216336;ENSMUST00000095817;ENSMUST00000208948;ENSMUST00000215232	GO:0003674(molecular_function);GO:0005085(guanyl-nucleotide exchange factor activity);GO:0005515(protein binding);GO:0005575(cellular_component);GO:0008150(biological_process);GO:0008150(biological_process)	NA	NA	NA	epithelial cell transforming sequence 2 oncogene-like [Source:MGI Symbol;Acc:MGI:3641723]	protein_coding;processed_transcript	NA	0.53437	1.93056	0.276795	-1.85311	1.10676e-14	6.07491e-13	down	yes
ENSMUSG00000109305	Smim38	127999;128002;128001	ENSMUST00000208788;ENSMUST00000207841;ENSMUST00000207703	GO:0016020(membrane);GO:0016021(integral component of membrane);GO:0016021(integral component of membrane)	NA	NA	NA	small integral membrane protein 38 [Source:MGI Symbol;Acc:MGI:1916283]	protein_coding;retained_intron	NA	1.68691	6.04327	0.279139	-1.84094	1.72762e-14	9.04465e-13	down	yes
ENSMUSG00000035504	Reep6	19641;19642;19645;19643	ENSMUST00000105355;ENSMUST00000105357;ENSMUST00000153167;ENSMUST00000105358	GO:0001917(photoreceptor inner segment);GO:0005515(protein binding);GO:0005783(endoplasmic reticulum);GO:0005789(endoplasmic reticulum membrane);GO:0016020(membrane);GO:0016021(integral component of membrane);GO:0030665(clathrin-coated vesicle membrane);GO:0031410(cytoplasmic vesicle);GO:0032386(regulation of intracellular transport);GO:0044317(rod spherule);GO:0045177(apical part of cell);GO:005…	NA	K17279	NA	receptor accessory protein 6 [Source:MGI Symbol;Acc:MGI:1917585]	protein_coding;retained_intron	R_MMU_9709957(Sensory_Perception);R_MMU_381753(Olfactory_Signaling_Pathway)	3.19857	11.3246	0.282445	-1.82396	2.27865e-17	1.81639e-15	down	yes
ENSMUSG00000043621	Ubxn10	97040;97039;97041;97042	ENSMUST00000105811;ENSMUST00000146415;ENSMUST00000105810;ENSMUST00000105809	GO:0003674(molecular_function);GO:0005515(protein binding);GO:0005929(cilium);GO:0030030(cell projection organization);GO:0030992(intraciliary transport particle B);GO:0042995(cell projection);GO:0060271(cilium assembly);GO:0060271(cilium assembly)	NA	NA	NA	UBX domain protein 10 [Source:MGI Symbol;Acc:MGI:2443123]	protein_coding;nonsense_mediated_decay	NA	2.62611	9.29679	0.282475	-1.8238	7.96992e-18	6.76079e-16	down	yes
ENSMUSG00000022871	Fetub	55073	ENSMUST00000023587	GO:0004857(enzyme inhibitor activity);GO:0004866(endopeptidase inhibitor activity);GO:0004869(cysteine-type endopeptidase inhibitor activity);GO:0005576(extracellular region);GO:0005615(extracellular space);GO:0007338(single fertilization);GO:0007339(binding of sperm to zona pellucida);GO:0008191(metalloendopeptidase inhibitor activity);GO:0010466(negative regulation of peptidase activity);GO:001…	NA	NA	NA	fetuin beta [Source:MGI Symbol;Acc:MGI:1890221]	protein_coding	NA	0.6161	2.17585	0.283154	-1.82034	6.35448e-12	2.0656e-10	down	yes
ENSMUSG00000010044	Zmynd10	140818;140822;140823;140819	ENSMUST00000010188;ENSMUST00000195158;ENSMUST00000192445;ENSMUST00000195627	GO:0003341(cilium movement);GO:0005515(protein binding);GO:0005737(cytoplasm);GO:0005815(microtubule organizing center);GO:0005856(cytoskeleton);GO:0005886(plasma membrane);GO:0006457(protein folding);GO:0016020(membrane);GO:0016324(apical plasma membrane);GO:0034451(centriolar satellite);GO:0036158(outer dynein arm assembly);GO:0036159(inner dynein arm assembly);GO:0044183(protein folding chaper…	NA	NA	NA	zinc finger, MYND domain containing 10 [Source:MGI Symbol;Acc:MGI:2387863]	protein_coding;retained_intron;processed_transcript	NA	3.63956	12.8215	0.283864	-1.81673	3.93476e-17	3.04823e-15	down	yes
ENSMUSG00000045655	Fam216b	47465;47467	ENSMUST00000066437;ENSMUST00000173826	GO:0003674(molecular_function);GO:0005575(cellular_component);GO:0008150(biological_process);GO:0008150(biological_process)	NA	NA	NA	family with sequence similarity 216, member B [Source:MGI Symbol;Acc:MGI:2145738]	protein_coding;nonsense_mediated_decay	NA	4.93629	17.3513	0.284491	-1.81355	1.24205e-17	1.02618e-15	down	yes
ENSMUSG00000005514	Por	106027;106026;106023;106031;106032;106030;106029;106024	ENSMUST00000122113;ENSMUST00000005651;ENSMUST00000153500;ENSMUST00000149684;ENSMUST00000132084;ENSMUST00000127096;ENSMUST00000147515;ENSMUST00000150058	GO:0003420(regulation of growth plate cartilage chondrocyte proliferation);GO:0003958(NADPH-hemoprotein reductase activity);GO:0004128(cytochrome-b5 reductase activity, acting on NAD(P)H);GO:0005737(cytoplasm);GO:0005739(mitochondrion);GO:0005783(endoplasmic reticulum);GO:0005789(endoplasmic reticulum membrane);GO:0005829(cytosol);GO:0007584(response to nutrient);GO:0008941(nitric oxide dioxygena…	NA	K00327	EC:1.6.2.4	P450 (cytochrome) oxidoreductase [Source:MGI Symbol;Acc:MGI:97744]	protein_coding;retained_intron;processed_transcript	NA	14.2202	49.8567	0.28522	-1.80985	1.60298e-18	1.49577e-16	down	yes
ENSMUSG00000045502	Hcar2	105188	ENSMUST00000057145	GO:0001614(purinergic nucleotide receptor activity);GO:0001781(neutrophil apoptotic process);GO:0004930(G protein-coupled receptor activity);GO:0005525(GTP binding);GO:0005886(plasma membrane);GO:0006915(apoptotic process);GO:0007165(signal transduction);GO:0007186(G protein-coupled receptor signaling pathway);GO:0016020(membrane);GO:0016021(integral component of membrane);GO:0030054(cell junctio…	04024(cAMP signaling pathway)	K08402	NA	hydroxycarboxylic acid receptor 2 [Source:MGI Symbol;Acc:MGI:1933383]	protein_coding	R_MMU_373076(Class_A/1_(Rhodopsin_like_receptors));R_MMU_3296197(Hydroxycarboxylic_acid_binding_receptors);R_MMU_500792(GPCR_ligand_binding);R_MMU_372790(Signaling_by_GPCR);R_MMU_388396(GPCR_downstream_signalling);R_MMU_162582(Signal_Transduction);R_MMU_418594(G_alpha_(i)_signalling_events)	0.743237	2.6056	0.285246	-1.80972	1.77713e-12	6.46572e-11	down	yes
ENSMUSG00000039372	Marchf4	10144	ENSMUST00000047786	GO:0000139(Golgi membrane);GO:0004842(ubiquitin-protein transferase activity);GO:0005794(Golgi apparatus);GO:0005795(Golgi stack);GO:0005802(trans-Golgi network);GO:0008270(zinc ion binding);GO:0016020(membrane);GO:0016021(integral component of membrane);GO:0016567(protein ubiquitination);GO:0016740(transferase activity);GO:0046872(metal ion binding)	NA	K10659	EC:2.3.2.27	membrane associated ring-CH-type finger 4 [Source:MGI Symbol;Acc:MGI:2683550]	protein_coding	NA	1.09412	3.82064	0.286371	-1.80404	2.97308e-16	2.03284e-14	down	yes
ENSMUSG00000048148	Nwd1	131312;131310;131309	ENSMUST00000161254;ENSMUST00000093427;ENSMUST00000161386	GO:0000166(nucleotide binding);GO:0005515(protein binding);GO:0005524(ATP binding);GO:0005737(cytoplasm);GO:0005829(cytosol);GO:0010628(positive regulation of gene expression);GO:0032088(negative regulation of NF-kappaB transcription factor activity);GO:0032088(negative regulation of NF-kappaB transcription factor activity)	NA	NA	NA	NACHT and WD repeat domain containing 1 [Source:MGI Symbol;Acc:MGI:2442268]	protein_coding;retained_intron	NA	0.3013	1.04826	0.287428	-1.79873	1.85472e-15	1.1316e-13	down	yes
ENSMUSG00000032860	P2ry2	123635;123636;123640;123639	ENSMUST00000037540;ENSMUST00000208340;ENSMUST00000208258;ENSMUST00000207049	GO:0004930(G protein-coupled receptor activity);GO:0005886(plasma membrane);GO:0007165(signal transduction);GO:0007186(G protein-coupled receptor signaling pathway);GO:0007200(phospholipase C-activating G protein-coupled receptor signaling pathway);GO:0016020(membrane);GO:0016021(integral component of membrane);GO:0035589(G protein-coupled purinergic nucleotide receptor signaling pathway);GO:0045…	04080(Neuroactive ligand-receptor interaction);04750(Inflammatory mediator regulation of TRP channels);04750(Inflammatory mediator regulation of TRP channels)	K04269	NA	purinergic receptor P2Y, G-protein coupled 2 [Source:MGI Symbol;Acc:MGI:105107]	protein_coding;retained_intron	R_MMU_373076(Class_A/1_(Rhodopsin_like_receptors));R_MMU_5683826(Surfactant_metabolism);R_MMU_417957(P2Y_receptors);R_MMU_500792(GPCR_ligand_binding);R_MMU_392499(Metabolism_of_proteins);R_MMU_416476(G_alpha_(q)_signalling_events);R_MMU_372790(Signaling_by_GPCR);R_MMU_388396(GPCR_downstream_signalling);R_MMU_418038(Nucleotide_like_(purinergic)_receptors);R_MMU_162582(Signal_Transduction)	1.1095	3.85637	0.287706	-1.79733	8.93016e-16	5.7585e-14	down	yes
ENSMUSG00000095210	Ighv5-9-1	36365;36366	ENSMUST00000103452;ENSMUST00000192264	GO:0003823(antigen binding);GO:0006910(phagocytosis, recognition);GO:0006911(phagocytosis, engulfment);GO:0006958(complement activation, classical pathway);GO:0009897(external side of plasma membrane);GO:0034987(immunoglobulin receptor binding);GO:0042571(immunoglobulin complex, circulating);GO:0042742(defense response to bacterium);GO:0045087(innate immune response);GO:0050853(B cell receptor si…	NA	NA	NA	immunoglobulin heavy variable 5-9-1 [Source:MGI Symbol;Acc:MGI:4439810]	IG_V_gene	R_MMU_2871809(FCERI_mediated_Ca+2_mobilization);R_MMU_977606(Regulation_of_Complement_cascade);R_MMU_5653656(Vesicle_mediated_transport);R_MMU_2029481(FCGR_activation);R_MMU_2029480(Fcgamma_receptor_(FCGR)_dependent_phagocytosis);R_MMU_983705(Signaling_by_the_B_Cell_Receptor_(BCR));R_MMU_109582(Hemostasis);R_MMU_173623(Classical_antibody_mediated_complement_activation);R_MMU_166663(Initial_trigge…	5.8262	20.2435	0.287805	-1.79683	4.06114e-14	1.99449e-12	down	yes
ENSMUSG00000076556	Igkv4-57	110671	ENSMUST00000103357	GO:0002377(immunoglobulin production);GO:0005615(extracellular space);GO:0006955(immune response)	NA	NA	NA	immunoglobulin kappa variable 4-57 [Source:MGI Symbol;Acc:MGI:2685035]	IG_V_gene	NA	123.426	428.121	0.288297	-1.79437	3.34614e-18	3.0159e-16	down	yes
ENSMUSG00000094694	Ighv1-9	36460	ENSMUST00000193893	GO:0003823(antigen binding);GO:0006910(phagocytosis, recognition);GO:0006911(phagocytosis, engulfment);GO:0006958(complement activation, classical pathway);GO:0009897(external side of plasma membrane);GO:0034987(immunoglobulin receptor binding);GO:0042571(immunoglobulin complex, circulating);GO:0042742(defense response to bacterium);GO:0045087(innate immune response);GO:0050853(B cell receptor si…	NA	NA	NA	immunoglobulin heavy variable V1-9 [Source:MGI Symbol;Acc:MGI:4439621]	IG_V_gene	R_MMU_2871809(FCERI_mediated_Ca+2_mobilization);R_MMU_977606(Regulation_of_Complement_cascade);R_MMU_5653656(Vesicle_mediated_transport);R_MMU_2029481(FCGR_activation);R_MMU_2029480(Fcgamma_receptor_(FCGR)_dependent_phagocytosis);R_MMU_983705(Signaling_by_the_B_Cell_Receptor_(BCR));R_MMU_109582(Hemostasis);R_MMU_173623(Classical_antibody_mediated_complement_activation);R_MMU_166663(Initial_trigge…	38.4134	133.163	0.288469	-1.79351	1.66894e-17	1.35074e-15	down	yes
ENSMUSG00000032323	Cyp11a1	137884;137883	ENSMUST00000188944;ENSMUST00000034874	GO:0004497(monooxygenase activity);GO:0005506(iron ion binding);GO:0005739(mitochondrion);GO:0005743(mitochondrial inner membrane);GO:0006629(lipid metabolic process);GO:0006694(steroid biosynthetic process);GO:0006700(C21-steroid hormone biosynthetic process);GO:0006704(glucocorticoid biosynthetic process);GO:0007617(mating behavior);GO:0008202(steroid metabolic process);GO:0008203(cholesterol m…	00140(Steroid hormone biosynthesis);04913(Ovarian steroidogenesis);04925(Aldosterone synthesis and secretion);04927(Cortisol synthesis and secretion);04934(Cushing syndrome);04934(Cushing syndrome)	K00498	EC:1.14.15.6	cytochrome P450, family 11, subfamily a, polypeptide 1 [Source:MGI Symbol;Acc:MGI:88582]	retained_intron;protein_coding	R_MMU_211897(Cytochrome_P450_arranged_by_substrate_type);R_MMU_556833(Metabolism_of_lipids);R_MMU_1430728(Metabolism);R_MMU_211976(Endogenous_sterols);R_MMU_211945(Phase_I_Functionalization_of_compounds);R_MMU_196071(Metabolism_of_steroid_hormones);R_MMU_8957322(Metabolism_of_steroids);R_MMU_211859(Biological_oxidations);R_MMU_196108(Pregnenolone_biosynthesis)	0.200939	0.692069	0.290345	-1.78416	1.40102e-10	3.69789e-09	down	yes
ENSMUSG00000095442	Ighv1-4	36447	ENSMUST00000103493	GO:0003823(antigen binding);GO:0006910(phagocytosis, recognition);GO:0006911(phagocytosis, engulfment);GO:0006958(complement activation, classical pathway);GO:0009897(external side of plasma membrane);GO:0034987(immunoglobulin receptor binding);GO:0042571(immunoglobulin complex, circulating);GO:0042742(defense response to bacterium);GO:0045087(innate immune response);GO:0050853(B cell receptor si…	NA	NA	NA	immunoglobulin heavy variable 1-4 [Source:MGI Symbol;Acc:MGI:4439618]	IG_V_gene	R_MMU_2871809(FCERI_mediated_Ca+2_mobilization);R_MMU_977606(Regulation_of_Complement_cascade);R_MMU_5653656(Vesicle_mediated_transport);R_MMU_2029481(FCGR_activation);R_MMU_2029480(Fcgamma_receptor_(FCGR)_dependent_phagocytosis);R_MMU_983705(Signaling_by_the_B_Cell_Receptor_(BCR));R_MMU_109582(Hemostasis);R_MMU_173623(Classical_antibody_mediated_complement_activation);R_MMU_166663(Initial_trigge…	80.2751	276.454	0.290374	-1.78401	6.90173e-18	5.95012e-16	down	yes
ENSMUSG00000022759	Lrrc74b	54344;54346;54343;54345	ENSMUST00000100123;ENSMUST00000232637;ENSMUST00000023442;ENSMUST00000232230	GO:0003674(molecular_function);GO:0005515(protein binding);GO:0005575(cellular_component);GO:0008150(biological_process);GO:0008150(biological_process)	NA	NA	NA	leucine rich repeat containing 74B [Source:MGI Symbol;Acc:MGI:1921935]	protein_coding;processed_transcript	NA	2.07267	7.11794	0.291189	-1.77997	1.13127e-16	8.12008e-15	down	yes
ENSMUSG00000002068	Ccne1	119496;119500;119497;119499;119498	ENSMUST00000108023;ENSMUST00000124979;ENSMUST00000128785;ENSMUST00000130329;ENSMUST00000137097	GO:0000079(regulation of cyclin-dependent protein serine/threonine kinase activity);GO:0000082(G1/S transition of mitotic cell cycle);GO:0000122(negative regulation of transcription by RNA polymerase II);GO:0000307(cyclin-dependent protein kinase holoenzyme complex);GO:0000723(telomere maintenance);GO:0005515(protein binding);GO:0005634(nucleus);GO:0005654(nucleoplasm);GO:0005737(cytoplasm);GO:00…	04110(Cell cycle);04114(Oocyte meiosis);04115(p53 signaling pathway);04151(PI3K-Akt signaling pathway);04218(Cellular senescence);04934(Cushing syndrome);05161(Hepatitis B);05162(Measles);05165(Human papillomavirus infection);05166(Human T-cell leukemia virus 1 infection);05169(Epstein-Barr virus infection);05200(Pathways in cancer);05203(Viral carcinogenesis);05206(MicroRNAs in cancer);05215(Pro…	K06626	NA	cyclin E1 [Source:MGI Symbol;Acc:MGI:88316]	protein_coding;nonsense_mediated_decay;retained_intron;processed_transcript	R_MMU_6804116(TP53_Regulates_Transcription_of_Genes_Involved_in_G1_Cell_Cycle_Arrest);R_MMU_69202(Cyclin_E_associated_events_during_G1/S_transition);R_MMU_69620(Cell_Cycle_Checkpoints);R_MMU_69206(G1/S_Transition);R_MMU_2559583(Cellular_Senescence);R_MMU_2262752(Cellular_responses_to_stress);R_MMU_69563(p53_Dependent_G1_DNA_Damage_Response);R_MMU_73857(RNA_Polymerase_II_Transcription);R_MMU_69239…	0.534273	1.83476	0.291195	-1.77994	4.75762e-12	1.58551e-10	down	yes
ENSMUSG00000027793	Ccna1	85474;85477	ENSMUST00000198102;ENSMUST00000197238	GO:0000079(regulation of cyclin-dependent protein serine/threonine kinase activity);GO:0000307(cyclin-dependent protein kinase holoenzyme complex);GO:0005515(protein binding);GO:0005634(nucleus);GO:0005737(cytoplasm);GO:0005819(spindle);GO:0005856(cytoskeleton);GO:0007049(cell cycle);GO:0007275(multicellular organism development);GO:0007283(spermatogenesis);GO:0015630(microtubule cytoskeleton);GO…	04110(Cell cycle);04152(AMPK signaling pathway);04218(Cellular senescence);04914(Progesterone-mediated oocyte maturation);05161(Hepatitis B);05165(Human papillomavirus infection);05166(Human T-cell leukemia virus 1 infection);05169(Epstein-Barr virus infection);05202(Transcriptional misregulation in cancer);05203(Viral carcinogenesis);05221(Acute myeloid leukemia);05221(Acute myeloid leukemia)	K06627	NA	cyclin A1 [Source:MGI Symbol;Acc:MGI:108042]	protein_coding	R_MMU_68949(Orc1_removal_from_chromatin);R_MMU_5689880(Ub_specific_processing_proteases);R_MMU_2559582(Senescence_Associated_Secretory_Phenotype_(SASP));R_MMU_6804116(TP53_Regulates_Transcription_of_Genes_Involved_in_G1_Cell_Cycle_Arrest);R_MMU_69202(Cyclin_E_associated_events_during_G1/S_transition);R_MMU_69620(Cell_Cycle_Checkpoints);R_MMU_69206(G1/S_Transition);R_MMU_5693567(HDR_through_Homolo…	0.502048	1.72366	0.291268	-1.77958	3.62161e-10	8.77093e-09	down	yes
ENSMUSG00000085081	Rptoros	30953	ENSMUST00000127450	NA	NA	NA	NA	regulatory associated protein of MTOR, complex 1, opposite strand [Source:MGI Symbol;Acc:MGI:2442055]	antisense	NA	1.26521	4.34011	0.291515	-1.77836	3.06394e-12	1.06121e-10	down	yes
ENSMUSG00000052273	Dnah3	125409;125411;125410;125413;125415	ENSMUST00000209154;ENSMUST00000208701;ENSMUST00000046993;ENSMUST00000208910;ENSMUST00000213993	GO:0000166(nucleotide binding);GO:0003774(motor activity);GO:0003777(microtubule motor activity);GO:0005524(ATP binding);GO:0005737(cytoplasm);GO:0005856(cytoskeleton);GO:0005874(microtubule);GO:0005929(cilium);GO:0007018(microtubule-based movement);GO:0008569(ATP-dependent microtubule motor activity, minus-end-directed);GO:0030286(dynein complex);GO:0036156(inner dynein arm);GO:0042995(cell proj…	05016(Huntington disease);05016(Huntington disease)	K10408	NA	dynein, axonemal, heavy chain 3 [Source:MGI Symbol;Acc:MGI:2683040]	protein_coding;retained_intron	NA	2.41235	8.26077	0.292025	-1.77584	8.15078e-18	6.87744e-16	down	yes
ENSMUSG00000048387	Osr1	31674;31673	ENSMUST00000057021;ENSMUST00000217975	GO:0000122(negative regulation of transcription by RNA polymerase II);GO:0000977(RNA polymerase II regulatory region sequence-specific DNA binding);GO:0001655(urogenital system development);GO:0001656(metanephros development);GO:0001657(ureteric bud development);GO:0001823(mesonephros development);GO:0002062(chondrocyte differentiation);GO:0003676(nucleic acid binding);GO:0005515(protein binding)…	NA	NA	NA	odd-skipped related transcription factor 1 [Source:MGI Symbol;Acc:MGI:1344424]	protein_coding	NA	0.672118	2.29977	0.292254	-1.7747	7.53292e-12	2.41403e-10	down	yes
ENSMUSG00000023949	Tcte1	62831;62832	ENSMUST00000113547;ENSMUST00000233588	GO:0005515(protein binding);GO:0005737(cytoplasm);GO:0005856(cytoskeleton);GO:0005929(cilium);GO:0030317(flagellated sperm motility);GO:0031514(motile cilium);GO:0036126(sperm flagellum);GO:0042995(cell projection);GO:0042995(cell projection)	NA	NA	NA	t-complex-associated testis expressed 1 [Source:MGI Symbol;Acc:MGI:98640]	protein_coding	NA	1.06648	3.62603	0.294118	-1.76554	1.29002e-14	6.93679e-13	down	yes
ENSMUSG00000022769	Sdf2l1	54248	ENSMUST00000023453	GO:0004169(dolichyl-phosphate-mannose-protein mannosyltransferase activity);GO:0005783(endoplasmic reticulum);GO:0005788(endoplasmic reticulum lumen);GO:0005789(endoplasmic reticulum membrane);GO:0016020(membrane);GO:0034663(endoplasmic reticulum chaperone complex);GO:0034976(response to endoplasmic reticulum stress);GO:0035269(protein O-linked mannosylation);GO:0042981(regulation of apoptotic pr…	NA	NA	NA	stromal cell-derived factor 2-like 1 [Source:MGI Symbol;Acc:MGI:2149842]	protein_coding	NA	9.53767	32.3915	0.29445	-1.76391	9.60996e-17	6.99279e-15	down	yes
ENSMUSG00000004988	Fxyd4	113267;113275;113269;113272;113270;113273;113274	ENSMUST00000203082;ENSMUST00000203842;ENSMUST00000203433;ENSMUST00000005114;ENSMUST00000204214;ENSMUST00000203921;ENSMUST00000205111	GO:0005267(potassium channel activity);GO:0005890(sodium:potassium-exchanging ATPase complex);GO:0006811(ion transport);GO:0015672(monovalent inorganic cation transport);GO:0016020(membrane);GO:0016021(integral component of membrane);GO:0017080(sodium channel regulator activity);GO:0043269(regulation of ion transport);GO:0051117(ATPase binding);GO:0071805(potassium ion transmembrane transport);GO…	04960(Aldosterone-regulated sodium reabsorption);04960(Aldosterone-regulated sodium reabsorption)	K13359	NA	FXYD domain-containing ion transport regulator 4 [Source:MGI Symbol;Acc:MGI:1889005]	protein_coding;retained_intron	R_MMU_936837(Ion_transport_by_P_type_ATPases);R_MMU_382551(Transport_of_small_molecules);R_MMU_5576891(Cardiac_conduction);R_MMU_5578775(Ion_homeostasis);R_MMU_397014(Muscle_contraction);R_MMU_983712(Ion_channel_transport)	1.24798	4.23175	0.29491	-1.76166	1.1762e-13	5.22633e-12	down	yes
ENSMUSG00000055301	Adh7	90114;90118;90116	ENSMUST00000090171;ENSMUST00000196133;ENSMUST00000199865	GO:0001523(retinoid metabolic process);GO:0004022(alcohol dehydrogenase (NAD+) activity);GO:0004024(alcohol dehydrogenase activity, zinc-dependent);GO:0004031(aldehyde oxidase activity);GO:0004745(retinol dehydrogenase activity);GO:0005737(cytoplasm);GO:0005829(cytosol);GO:0005886(plasma membrane);GO:0006067(ethanol metabolic process);GO:0006068(ethanol catabolic process);GO:0006069(ethanol oxida…	00010(Glycolysis / Gluconeogenesis);00071(Fatty acid degradation);00350(Tyrosine metabolism);00830(Retinol metabolism);00980(Metabolism of xenobiotics by cytochrome P450);00982(Drug metabolism - cytochrome P450);05204(Chemical carcinogenesis);05204(Chemical carcinogenesis)	K13951	EC:1.1.1.1	alcohol dehydrogenase 7 (class IV), mu or sigma polypeptide [Source:MGI Symbol;Acc:MGI:87926]	protein_coding;processed_transcript;retained_intron	R_MMU_1430728(Metabolism);R_MMU_71384(Ethanol_oxidation);R_MMU_211945(Phase_I_Functionalization_of_compounds);R_MMU_211859(Biological_oxidations)	1.22845	4.15872	0.295391	-1.7593	2.33604e-15	1.39836e-13	down	yes
ENSMUSG00000076508	Igkv17-127	110541	ENSMUST00000200586	GO:0002377(immunoglobulin production);GO:0005615(extracellular space);GO:0006955(immune response)	NA	NA	NA	immunoglobulin kappa variable 17-127 [Source:MGI Symbol;Acc:MGI:3646891]	IG_V_gene	NA	217.178	734.623	0.295631	-1.75813	1.04764e-17	8.70091e-16	down	yes
ENSMUSG00000039577	Nphp4	98140	ENSMUST00000081393	GO:0005515(protein binding);GO:0005654(nucleoplasm);GO:0005737(cytoplasm);GO:0005813(centrosome);GO:0005815(microtubule organizing center);GO:0005829(cytosol);GO:0005856(cytoskeleton);GO:0005911(cell-cell junction);GO:0005923(bicellular tight junction);GO:0005929(cilium);GO:0016604(nuclear body);GO:0030054(cell junction);GO:0030317(flagellated sperm motility);GO:0032391(photoreceptor connecting c…	NA	K16478	NA	nephronophthisis 4 (juvenile) homolog (human) [Source:MGI Symbol;Acc:MGI:2384210]	protein_coding	R_MMU_5617833(Cilium_Assembly);R_MMU_5620912(Anchoring_of_the_basal_body_to_the_plasma_membrane);R_MMU_2028269(Signaling_by_Hippo);R_MMU_1852241(Organelle_biogenesis_and_maintenance);R_MMU_162582(Signal_Transduction)	0.254694	0.854987	0.297892	-1.74714	4.58784e-12	1.53862e-10	down	yes
ENSMUSG00000024922	Ovol1	69317	ENSMUST00000025861	GO:0000122(negative regulation of transcription by RNA polymerase II);GO:0000978(RNA polymerase II cis-regulatory region sequence-specific DNA binding);GO:0001227(DNA-binding transcription repressor activity, RNA polymerase II-specific);GO:0001228(DNA-binding transcription activator activity, RNA polymerase II-specific);GO:0001822(kidney development);GO:0003676(nucleic acid binding);GO:0003677(DN…	NA	K09216	NA	ovo like zinc finger 1 [Source:MGI Symbol;Acc:MGI:1330290]	protein_coding	NA	0.277238	0.929542	0.298252	-1.7454	3.71322e-10	8.96543e-09	down	yes
ENSMUSG00000003153	Slc2a3	113643;113644;113646	ENSMUST00000032476;ENSMUST00000168704;ENSMUST00000169979	GO:0002080(acrosomal membrane);GO:0005355(glucose transmembrane transporter activity);GO:0005536(glucose binding);GO:0005737(cytoplasm);GO:0005886(plasma membrane);GO:0005887(integral component of plasma membrane);GO:0005901(caveola);GO:0008643(carbohydrate transport);GO:0015145(monosaccharide transmembrane transporter activity);GO:0016020(membrane);GO:0016021(integral component of membrane);GO:0…	NA	K08142	NA	solute carrier family 2 (facilitated glucose transporter), member 3 [Source:MGI Symbol;Acc:MGI:95757]	protein_coding;retained_intron	R_MMU_196836(Vitamin_C_(ascorbate)_metabolism);R_MMU_196854(Metabolism_of_vitamins_and_cofactors);R_MMU_1430728(Metabolism);R_MMU_196849(Metabolism_of_water_soluble_vitamins_and_cofactors);R_MMU_425407(SLC_mediated_transmembrane_transport);R_MMU_382551(Transport_of_small_molecules);R_MMU_168256(Immune_System);R_MMU_189200(Cellular_hexose_transport);R_MMU_6798695(Neutrophil_degranulation);R_MMU_16…	2.08961	6.99253	0.298834	-1.74258	7.46273e-17	5.53183e-15	down	yes
ENSMUSG00000093894	Ighv1-53	36526	ENSMUST00000103523	GO:0003823(antigen binding);GO:0006910(phagocytosis, recognition);GO:0006911(phagocytosis, engulfment);GO:0006958(complement activation, classical pathway);GO:0009897(external side of plasma membrane);GO:0034987(immunoglobulin receptor binding);GO:0042571(immunoglobulin complex, circulating);GO:0042742(defense response to bacterium);GO:0045087(innate immune response);GO:0050853(B cell receptor si…	NA	NA	NA	immunoglobulin heavy variable 1-53 [Source:MGI Symbol;Acc:MGI:3576502]	IG_V_gene	R_MMU_2871809(FCERI_mediated_Ca+2_mobilization);R_MMU_977606(Regulation_of_Complement_cascade);R_MMU_5653656(Vesicle_mediated_transport);R_MMU_2029481(FCGR_activation);R_MMU_2029480(Fcgamma_receptor_(FCGR)_dependent_phagocytosis);R_MMU_983705(Signaling_by_the_B_Cell_Receptor_(BCR));R_MMU_109582(Hemostasis);R_MMU_173623(Classical_antibody_mediated_complement_activation);R_MMU_166663(Initial_trigge…	7.83122	26.0721	0.300368	-1.7352	1.11318e-13	4.97421e-12	down	yes
ENSMUSG00000026622	Nek2	15811;15813;15814;15812	ENSMUST00000027931;ENSMUST00000150839;ENSMUST00000136733;ENSMUST00000126446	GO:0000070(mitotic sister chromatid segregation);GO:0000166(nucleotide binding);GO:0000775(chromosome, centromeric region);GO:0000776(kinetochore);GO:0000777(condensed chromosome kinetochore);GO:0000794(condensed nuclear chromosome);GO:0000922(spindle pole);GO:0001824(blastocyst development);GO:0004672(protein kinase activity);GO:0004674(protein serine/threonine kinase activity);GO:0005515(protei…	NA	K20872	EC:2.7.11.1	NIMA (never in mitosis gene a)-related expressed kinase 2 [Source:MGI Symbol;Acc:MGI:109359]	protein_coding;retained_intron;processed_transcript	R_MMU_380287(Centrosome_maturation);R_MMU_380259(Loss_of_Nlp_from_mitotic_centrosomes);R_MMU_2565942(Regulation_of_PLK1_Activity_at_G2/M_Transition);R_MMU_176814(Activation_of_APC/C_and_APC/C:Cdc20_mediated_degradation_of_mitotic_proteins);R_MMU_179409(APC_Cdc20_mediated_degradation_of_Nek2A);R_MMU_1640170(Cell_Cycle);R_MMU_5617833(Cilium_Assembly);R_MMU_380270(Recruitment_of_mitotic_centrosome_p…	2.57019	8.5306	0.301291	-1.73077	2.61708e-16	1.79717e-14	down	yes
ENSMUSG00000095416	Ighv1-12	36465;36463;36464	ENSMUST00000195469;ENSMUST00000103500;ENSMUST00000109711	GO:0003823(antigen binding);GO:0006910(phagocytosis, recognition);GO:0006911(phagocytosis, engulfment);GO:0006958(complement activation, classical pathway);GO:0009897(external side of plasma membrane);GO:0034987(immunoglobulin receptor binding);GO:0042571(immunoglobulin complex, circulating);GO:0042742(defense response to bacterium);GO:0045087(innate immune response);GO:0050853(B cell receptor si…	NA	NA	NA	immunoglobulin heavy variable V1-12 [Source:MGI Symbol;Acc:MGI:3646284]	IG_V_gene	R_MMU_2871809(FCERI_mediated_Ca+2_mobilization);R_MMU_977606(Regulation_of_Complement_cascade);R_MMU_5653656(Vesicle_mediated_transport);R_MMU_2029481(FCGR_activation);R_MMU_2029480(Fcgamma_receptor_(FCGR)_dependent_phagocytosis);R_MMU_983705(Signaling_by_the_B_Cell_Receptor_(BCR));R_MMU_109582(Hemostasis);R_MMU_173623(Classical_antibody_mediated_complement_activation);R_MMU_166663(Initial_trigge…	10.4825	34.7901	0.301307	-1.73069	1.09615e-14	6.03758e-13	down	yes
ENSMUSG00000014725	Adam28	46997;46999;47002;46998;47000;47001	ENSMUST00000111072;ENSMUST00000224039;ENSMUST00000225767;ENSMUST00000022642;ENSMUST00000230006;ENSMUST00000224131	GO:0004222(metalloendopeptidase activity);GO:0005739(mitochondrion);GO:0005886(plasma membrane);GO:0006508(proteolysis);GO:0008233(peptidase activity);GO:0008237(metallopeptidase activity);GO:0016020(membrane);GO:0016021(integral component of membrane);GO:0016787(hydrolase activity);GO:0046872(metal ion binding);GO:0046872(metal ion binding)	NA	K08614	EC:3.4.24.-	a disintegrin and metallopeptidase domain 28 [Source:MGI Symbol;Acc:MGI:105988]	protein_coding;retained_intron	NA	1.2066	3.97887	0.303252	-1.72141	4.37463e-16	2.92805e-14	down	yes
ENSMUSG00000090336	Cfap97d2	128685;128683;128686;128684	ENSMUST00000214337;ENSMUST00000166277;ENSMUST00000208283;ENSMUST00000209042	GO:0003674(molecular_function);GO:0005575(cellular_component);GO:0008150(biological_process);GO:0008150(biological_process)	NA	NA	NA	CFAP97 domain containing 2 [Source:MGI Symbol;Acc:MGI:2685952]	protein_coding;processed_transcript	NA	0.514907	1.69604	0.303593	-1.71979	2.88906e-13	1.20921e-11	down	yes
ENSMUSG00000052212	Cd177	117795;117796	ENSMUST00000063956;ENSMUST00000206160	GO:0002020(protease binding);GO:0002376(immune system process);GO:0005178(integrin binding);GO:0005886(plasma membrane);GO:0007155(cell adhesion);GO:0007159(leukocyte cell-cell adhesion);GO:0016020(membrane);GO:0016021(integral component of membrane);GO:0030100(regulation of endocytosis);GO:0030667(secretory granule membrane);GO:0032930(positive regulation of superoxide anion generation);GO:00343…	NA	K06552	NA	CD177 antigen [Source:MGI Symbol;Acc:MGI:1916141]	protein_coding;retained_intron	R_MMU_109582(Hemostasis);R_MMU_202733(Cell_surface_interactions_at_the_vascular_wall);R_MMU_168256(Immune_System);R_MMU_6798695(Neutrophil_degranulation);R_MMU_168249(Innate_Immune_System);R_MMU_140875(Common_Pathway_of_Fibrin_Clot_Formation);R_MMU_140877(Formation_of_Fibrin_Clot_(Clotting_Cascade))	14.4242	47.4771	0.303813	-1.71874	6.49241e-17	4.85798e-15	down	yes
ENSMUSG00000000386	Mx1	57862;57861;57868;57866;57865;57869;57860;57870	ENSMUST00000023655;ENSMUST00000155233;ENSMUST00000231995;ENSMUST00000238205;ENSMUST00000232282;ENSMUST00000231461;ENSMUST00000135184;ENSMUST00000231455	GO:0000166(nucleotide binding);GO:0003924(GTPase activity);GO:0005525(GTP binding);GO:0005525(GTP binding)	NA	NA	NA	MX dynamin-like GTPase 1 [Source:MGI Symbol;Acc:MGI:97243]	protein_coding;processed_transcript;retained_intron	NA	1.05014	3.45444	0.303996	-1.71787	2.72881e-14	1.38741e-12	down	yes
ENSMUSG00000027230	Creb3l1	78631	ENSMUST00000028663	GO:0000122(negative regulation of transcription by RNA polymerase II);GO:0000790(nuclear chromatin);GO:0000976(transcription regulatory region sequence-specific DNA binding);GO:0001227(DNA-binding transcription repressor activity, RNA polymerase II-specific);GO:0003677(DNA binding);GO:0003700(DNA-binding transcription factor activity);GO:0005634(nucleus);GO:0005783(endoplasmic reticulum);GO:00063…	04022(cGMP-PKG signaling pathway);04024(cAMP signaling pathway);04151(PI3K-Akt signaling pathway);04152(AMPK signaling pathway);04211(Longevity regulating pathway);04261(Adrenergic signaling in cardiomyocytes);04668(TNF signaling pathway);04714(Thermogenesis);04725(Cholinergic synapse);04728(Dopaminergic synapse);04911(Insulin secretion);04915(Estrogen signaling pathway);04916(Melanogenesis);0491…	K09048	NA	cAMP responsive element binding protein 3-like 1 [Source:MGI Symbol;Acc:MGI:1347062]	protein_coding	NA	3.18083	10.4617	0.304046	-1.71764	1.03725e-15	6.63463e-14	down	yes
ENSMUSG00000076617	Ighm	36303;36302	ENSMUST00000103426;ENSMUST00000177715	GO:0002250(adaptive immune response);GO:0003697(single-stranded DNA binding);GO:0005615(extracellular space);GO:0009986(cell surface);GO:0016020(membrane);GO:0016021(integral component of membrane);GO:0019731(antibacterial humoral response);GO:0031210(phosphatidylcholine binding);GO:0034987(immunoglobulin receptor binding);GO:0042834(peptidoglycan binding);GO:0045087(innate immune response);GO:00…	NA	NA	NA	immunoglobulin heavy constant mu [Source:MGI Symbol;Acc:MGI:96448]	IG_C_gene	NA	374.495	1227.61	0.30506	-1.71283	4.49637e-17	3.46242e-15	down	yes
ENSMUSG00000110126	Gm9347	126915	ENSMUST00000211473	NA	NA	NA	NA	predicted gene 9347 [Source:MGI Symbol;Acc:MGI:3648409]	processed_pseudogene	NA	0.621353	2.02453	0.306912	-1.7041	7.19321e-10	1.65852e-08	down	yes
ENSMUSG00000047501	Cldn4	105911	ENSMUST00000051401	GO:0005198(structural molecule activity);GO:0005254(chloride channel activity);GO:0005515(protein binding);GO:0005886(plasma membrane);GO:0005887(integral component of plasma membrane);GO:0005911(cell-cell junction);GO:0005923(bicellular tight junction);GO:0006811(ion transport);GO:0006821(chloride transport);GO:0007155(cell adhesion);GO:0007565(female pregnancy);GO:0007623(circadian rhythm);GO:0…	04514(Cell adhesion molecules (CAMs));04530(Tight junction);04670(Leukocyte transendothelial migration);05160(Hepatitis C)	K06087	NA	claudin 4 [Source:MGI Symbol;Acc:MGI:1313314]	protein_coding	NA	1.4262	4.64549	0.307007	-1.70366	3.74072e-13	1.53331e-11	down	yes
ENSMUSG00000051435	Fhad1	97349;97352;97350;97354;97351;97355	ENSMUST00000105780;ENSMUST00000036701;ENSMUST00000105779;ENSMUST00000124125;ENSMUST00000137618;ENSMUST00000123068	GO:0003674(molecular_function);GO:0005515(protein binding);GO:0005575(cellular_component);GO:0008150(biological_process);GO:0008150(biological_process)	NA	NA	NA	forkhead-associated (FHA) phosphopeptide binding domain 1 [Source:MGI Symbol;Acc:MGI:1920323]	protein_coding;processed_transcript;retained_intron	NA	3.27033	10.6504	0.307061	-1.7034	2.14605e-16	1.49311e-14	down	yes
ENSMUSG00000032514	Ttc21a	142096;142094;142095;142097	ENSMUST00000160790;ENSMUST00000035100;ENSMUST00000159128;ENSMUST00000161967	GO:0003674(molecular_function);GO:0005515(protein binding);GO:0005929(cilium);GO:0007283(spermatogenesis);GO:0007286(spermatid development);GO:0030154(cell differentiation);GO:0030317(flagellated sperm motility);GO:0030991(intraciliary transport particle A);GO:0035721(intraciliary retrograde transport);GO:0061512(protein localization to cilium);GO:0061512(protein localization to cilium)	NA	NA	NA	tetratricopeptide repeat domain 21A [Source:MGI Symbol;Acc:MGI:1921302]	retained_intron;protein_coding	NA	3.36093	10.9426	0.307143	-1.70302	2.45302e-16	1.69184e-14	down	yes
ENSMUSG00000095429	Ighv5-12	36361	ENSMUST00000103450	GO:0003823(antigen binding);GO:0006910(phagocytosis, recognition);GO:0006911(phagocytosis, engulfment);GO:0006958(complement activation, classical pathway);GO:0009897(external side of plasma membrane);GO:0034987(immunoglobulin receptor binding);GO:0042571(immunoglobulin complex, circulating);GO:0042742(defense response to bacterium);GO:0045087(innate immune response);GO:0050853(B cell receptor si…	NA	NA	NA	immunoglobulin heavy variable 5-12 [Source:MGI Symbol;Acc:MGI:4439516]	IG_V_gene	R_MMU_2871809(FCERI_mediated_Ca+2_mobilization);R_MMU_977606(Regulation_of_Complement_cascade);R_MMU_5653656(Vesicle_mediated_transport);R_MMU_2029481(FCGR_activation);R_MMU_2029480(Fcgamma_receptor_(FCGR)_dependent_phagocytosis);R_MMU_983705(Signaling_by_the_B_Cell_Receptor_(BCR));R_MMU_109582(Hemostasis);R_MMU_173623(Classical_antibody_mediated_complement_activation);R_MMU_166663(Initial_trigge…	19.5839	63.7326	0.307282	-1.70236	3.2832e-15	1.93611e-13	down	yes
ENSMUSG00000062778	Chia1	88636;88637;88638	ENSMUST00000079132;ENSMUST00000139086;ENSMUST00000143128	GO:0000272(polysaccharide catabolic process);GO:0001878(response to yeast);GO:0002376(immune system process);GO:0002532(production of molecular mediator involved in inflammatory response);GO:0004553(hydrolase activity, hydrolyzing O-glycosyl compounds);GO:0004568(chitinase activity);GO:0005576(extracellular region);GO:0005615(extracellular space);GO:0005737(cytoplasm);GO:0005975(carbohydrate meta…	00520(Amino sugar and nucleotide sugar metabolism);00520(Amino sugar and nucleotide sugar metabolism)	K01183	EC:3.2.1.14	chitinase, acidic 1 [Source:MGI Symbol;Acc:MGI:1932052]	protein_coding;retained_intron	R_MMU_8935690(Digestion);R_MMU_189085(Digestion_of_dietary_carbohydrate);R_MMU_8963743(Digestion_and_absorption)	171.31	556.559	0.307802	-1.69992	7.70219e-17	5.68278e-15	down	yes
ENSMUSG00000038060	Dlec1	142015;142018;142013;142019;142020;142014;142017	ENSMUST00000140326;ENSMUST00000138736;ENSMUST00000124213;ENSMUST00000128211;ENSMUST00000148611;ENSMUST00000165231;ENSMUST00000137047	GO:0005737(cytoplasm);GO:0005829(cytosol);GO:0008285(negative regulation of cell population proliferation);GO:0008285(negative regulation of cell population proliferation)	NA	NA	NA	deleted in lung and esophageal cancer 1 [Source:MGI Symbol;Acc:MGI:2443671]	protein_coding;retained_intron	NA	1.05172	3.41426	0.308037	-1.69882	4.21159e-15	2.44719e-13	down	yes
ENSMUSG00000037627	Rgs22	49097;49102;49098	ENSMUST00000172831;ENSMUST00000164955;ENSMUST00000173018	GO:0001965(G-protein alpha-subunit binding);GO:0005634(nucleus);GO:0005737(cytoplasm);GO:0009966(regulation of signal transduction);GO:0009968(negative regulation of signal transduction);GO:0009968(negative regulation of signal transduction)	NA	NA	NA	regulator of G-protein signalling 22 [Source:MGI Symbol;Acc:MGI:3613651]	protein_coding;retained_intron	NA	1.11049	3.59609	0.308805	-1.69523	6.58015e-15	3.74125e-13	down	yes
ENSMUSG00000108688	Gm44985	125592	ENSMUST00000206202	NA	NA	NA	NA	predicted gene 44985 [Source:MGI Symbol;Acc:MGI:5753561]	TEC	NA	1.33564	4.32224	0.309017	-1.69424	8.14932e-11	2.25607e-09	down	yes
ENSMUSG00000047586	Nccrp1	118392;118391	ENSMUST00000239002;ENSMUST00000057974	GO:0005737(cytoplasm);GO:0006516(glycoprotein catabolic process);GO:0008284(positive regulation of cell population proliferation);GO:0016567(protein ubiquitination);GO:0019005(SCF ubiquitin ligase complex);GO:0030433(ubiquitin-dependent ERAD pathway);GO:0031146(SCF-dependent proteasomal ubiquitin-dependent protein catabolic process);GO:0061630(ubiquitin protein ligase activity);GO:0061630(ubiquit…	NA	NA	NA	non-specific cytotoxic cell receptor protein 1 homolog (zebrafish) [Source:MGI Symbol;Acc:MGI:2685009]	protein_coding	NA	1.00066	3.23793	0.309043	-1.69412	2.41145e-11	7.24487e-10	down	yes
ENSMUSG00000038037	Socs1	53842;53843	ENSMUST00000229866;ENSMUST00000038099	GO:0001932(regulation of protein phosphorylation);GO:0005159(insulin-like growth factor receptor binding);GO:0005515(protein binding);GO:0005634(nucleus);GO:0005654(nucleoplasm);GO:0005737(cytoplasm);GO:0005829(cytosol);GO:0005942(phosphatidylinositol 3-kinase complex);GO:0007259(receptor signaling pathway via JAK-STAT);GO:0009968(negative regulation of signal transduction);GO:0010533(regulation …	04120(Ubiquitin mediated proteolysis);04380(Osteoclast differentiation);04630(Jak-STAT signaling pathway);04910(Insulin signaling pathway);04917(Prolactin signaling pathway);04930(Type II diabetes mellitus);05145(Toxoplasmosis);05206(MicroRNAs in cancer);05206(MicroRNAs in cancer)	K04694	NA	suppressor of cytokine signaling 1 [Source:MGI Symbol;Acc:MGI:1354910]	protein_coding	R_MMU_877300(Interferon_gamma_signaling);R_MMU_6785807(Interleukin_4_and_Interleukin_13_signaling);R_MMU_449147(Signaling_by_Interleukins);R_MMU_9674555(Signaling_by_CSF3_(G_CSF));R_MMU_168256(Immune_System);R_MMU_9705462(Inactivation_of_CSF3_(G_CSF)_signaling);R_MMU_1280215(Cytokine_Signaling_in_Immune_system);R_MMU_913531(Interferon_Signaling);R_MMU_983168(Antigen_processing:_Ubiquitination_&_P…	0.66321	2.14246	0.309556	-1.69173	4.17087e-12	1.40771e-10	down	yes
ENSMUSG00000016526	Dyrk3	12477	ENSMUST00000016670	GO:0000166(nucleotide binding);GO:0000242(pericentriolar material);GO:0000287(magnesium ion binding);GO:0004672(protein kinase activity);GO:0004674(protein serine/threonine kinase activity);GO:0004712(protein serine/threonine/tyrosine kinase activity);GO:0004713(protein tyrosine kinase activity);GO:0005515(protein binding);GO:0005524(ATP binding);GO:0005634(nucleus);GO:0005654(nucleoplasm);GO:000…	NA	K18669	EC:2.7.12.1	dual-specificity tyrosine-(Y)-phosphorylation regulated kinase 3 [Source:MGI Symbol;Acc:MGI:1330300]	protein_coding	NA	0.64996	2.0946	0.310302	-1.68825	3.10575e-12	1.07334e-10	down	yes
ENSMUSG00000046352	Gjb2	46414	ENSMUST00000055698	GO:0002931(response to ischemia);GO:0005243(gap junction channel activity);GO:0005509(calcium ion binding);GO:0005515(protein binding);GO:0005737(cytoplasm);GO:0005829(cytosol);GO:0005886(plasma membrane);GO:0005887(integral component of plasma membrane);GO:0005921(gap junction);GO:0005922(connexin complex);GO:0007154(cell communication);GO:0007267(cell-cell signaling);GO:0007565(female pregnancy…	NA	K07621	NA	gap junction protein, beta 2 [Source:MGI Symbol;Acc:MGI:95720]	protein_coding	R_MMU_157858(Gap_junction_trafficking_and_regulation);R_MMU_5653656(Vesicle_mediated_transport);R_MMU_190861(Gap_junction_assembly);R_MMU_190872(Transport_of_connexons_to_the_plasma_membrane);R_MMU_199991(Membrane_Trafficking);R_MMU_190828(Gap_junction_trafficking)	0.611675	1.96567	0.311179	-1.68418	6.34132e-11	1.7899e-09	down	yes
ENSMUSG00000020889	Nr1d1	28777;28778	ENSMUST00000064941;ENSMUST00000139220	GO:0000122(negative regulation of transcription by RNA polymerase II);GO:0000790(nuclear chromatin);GO:0000976(transcription regulatory region sequence-specific DNA binding);GO:0000977(RNA polymerase II regulatory region sequence-specific DNA binding);GO:0000978(RNA polymerase II cis-regulatory region sequence-specific DNA binding);GO:0001222(transcription corepressor binding);GO:0001227(DNA-bind…	04710(Circadian rhythm);04710(Circadian rhythm)	K03728	NA	nuclear receptor subfamily 1, group D, member 1 [Source:MGI Symbol;Acc:MGI:2444210]	protein_coding;processed_transcript	R_MMU_73857(RNA_Polymerase_II_Transcription);R_MMU_212436(Generic_Transcription_Pathway);R_MMU_383280(Nuclear_Receptor_transcription_pathway);R_MMU_74160(Gene_expression_(Transcription))	4.24474	13.6365	0.311278	-1.68373	1.15588e-15	7.33428e-14	down	yes
ENSMUSG00000019027	Dnah1	43991;43992	ENSMUST00000048603;ENSMUST00000228429	GO:0000166(nucleotide binding);GO:0003341(cilium movement);GO:0003351(epithelial cilium movement involved in extracellular fluid movement);GO:0003774(motor activity);GO:0003777(microtubule motor activity);GO:0005524(ATP binding);GO:0005576(extracellular region);GO:0005737(cytoplasm);GO:0005856(cytoskeleton);GO:0005858(axonemal dynein complex);GO:0005874(microtubule);GO:0005929(cilium);GO:0005930(…	05016(Huntington disease);05016(Huntington disease)	K10408	NA	dynein, axonemal, heavy chain 1 [Source:MGI Symbol;Acc:MGI:107721]	protein_coding;processed_transcript	NA	0.648638	2.08118	0.311669	-1.68191	3.55606e-15	2.08154e-13	down	yes
ENSMUSG00000039963	Ccdc40	30885;30888;30890;30886;30891;30889	ENSMUST00000236813;ENSMUST00000133788;ENSMUST00000155683;ENSMUST00000053440;ENSMUST00000125724;ENSMUST00000126652	GO:0001947(heart looping);GO:0003341(cilium movement);GO:0003351(epithelial cilium movement involved in extracellular fluid movement);GO:0003356(regulation of cilium beat frequency);GO:0003674(molecular_function);GO:0005576(extracellular region);GO:0005737(cytoplasm);GO:0005929(cilium);GO:0005930(axoneme);GO:0007368(determination of left/right symmetry);GO:0030317(flagellated sperm motility);GO:0…	NA	NA	NA	coiled-coil domain containing 40 [Source:MGI Symbol;Acc:MGI:2443893]	protein_coding;retained_intron;processed_transcript	NA	2.11185	6.77149	0.311873	-1.68097	1.41779e-15	8.85452e-14	down	yes
ENSMUSG00000009185	Ccl8	27458	ENSMUST00000009329	GO:0002548(monocyte chemotaxis);GO:0005125(cytokine activity);GO:0005576(extracellular region);GO:0005615(extracellular space);GO:0006935(chemotaxis);GO:0006954(inflammatory response);GO:0006955(immune response);GO:0007165(signal transduction);GO:0007186(G protein-coupled receptor signaling pathway);GO:0008009(chemokine activity);GO:0008201(heparin binding);GO:0030593(neutrophil chemotaxis);GO:00…	04060(Cytokine-cytokine receptor interaction);04062(Chemokine signaling pathway)	K16596	NA	chemokine (C-C motif) ligand 8 [Source:MGI Symbol;Acc:MGI:101878]	protein_coding	NA	108.93	348.915	0.312196	-1.67948	2.40243e-16	1.66418e-14	down	yes
ENSMUSG00000024354	Slc23a1	66216;66219	ENSMUST00000025212;ENSMUST00000236196	GO:0005737(cytoplasm);GO:0005886(plasma membrane);GO:0005903(brush border);GO:0006811(ion transport);GO:0006814(sodium ion transport);GO:0007420(brain development);GO:0008520(L-ascorbate:sodium symporter activity);GO:0009636(response to toxic substance);GO:0009925(basal plasma membrane);GO:0015081(sodium ion transmembrane transporter activity);GO:0015229(L-ascorbic acid transmembrane transporter …	04977(Vitamin digestion and absorption);04977(Vitamin digestion and absorption)	K14611	NA	solute carrier family 23 (nucleobase transporters), member 1 [Source:MGI Symbol;Acc:MGI:1341903]	protein_coding;processed_transcript	R_MMU_196836(Vitamin_C_(ascorbate)_metabolism);R_MMU_196854(Metabolism_of_vitamins_and_cofactors);R_MMU_1430728(Metabolism);R_MMU_196849(Metabolism_of_water_soluble_vitamins_and_cofactors)	1.5498	4.95361	0.312864	-1.67639	2.48148e-14	1.2698e-12	down	yes
ENSMUSG00000046192	Iqub	108223	ENSMUST00000052277	GO:0001669(acrosomal vesicle);GO:0005515(protein binding);GO:0007224(smoothened signaling pathway);GO:0030030(cell projection organization);GO:0031514(motile cilium);GO:0060271(cilium assembly)	NA	NA	NA	IQ motif and ubiquitin domain containing [Source:MGI Symbol;Acc:MGI:3041159]	protein_coding	NA	1.21257	3.87007	0.313319	-1.67429	4.46118e-14	2.17079e-12	down	yes
ENSMUSG00000028186	Uox	90466;90470;90469;90463	ENSMUST00000029837;ENSMUST00000197320;ENSMUST00000138921;ENSMUST00000199489	GO:0004846(urate oxidase activity);GO:0005739(mitochondrion);GO:0005777(peroxisome);GO:0005829(cytosol);GO:0006144(purine nucleobase metabolic process);GO:0016491(oxidoreductase activity);GO:0019628(urate catabolic process);GO:0055114(oxidation-reduction process);GO:0055114(oxidation-reduction process)	00230(Purine metabolism);00232(Caffeine metabolism);00232(Caffeine metabolism)	K00365	EC:1.7.3.3	urate oxidase [Source:MGI Symbol;Acc:MGI:98907]	protein_coding;retained_intron	NA	0.395861	1.26288	0.313459	-1.67365	8.10385e-12	2.58135e-10	down	yes
ENSMUSG00000027377	Mall	80451	ENSMUST00000028856	GO:0000139(Golgi membrane);GO:0005886(plasma membrane);GO:0016020(membrane);GO:0016021(integral component of membrane);GO:0019911(structural constituent of myelin sheath);GO:0030136(clathrin-coated vesicle);GO:0031410(cytoplasmic vesicle);GO:0042552(myelination);GO:0045121(membrane raft)	NA	NA	NA	mal, T cell differentiation protein-like [Source:MGI Symbol;Acc:MGI:2385152]	protein_coding	NA	2.33998	7.45564	0.313853	-1.67184	4.05349e-14	1.99449e-12	down	yes
ENSMUSG00000066196	Spag8	92237;92238	ENSMUST00000084646;ENSMUST00000107870	GO:0001669(acrosomal vesicle);GO:0005515(protein binding);GO:0005634(nucleus);GO:0005737(cytoplasm);GO:0005819(spindle);GO:0005856(cytoskeleton);GO:0007049(cell cycle);GO:0007283(spermatogenesis);GO:0007338(single fertilization);GO:0008017(microtubule binding);GO:0030154(cell differentiation);GO:0031410(cytoplasmic vesicle);GO:0032092(positive regulation of protein binding);GO:0045944(positive re…	NA	NA	NA	sperm associated antigen 8 [Source:MGI Symbol;Acc:MGI:3056295]	protein_coding	NA	2.60666	8.2997	0.314067	-1.67085	5.76237e-14	2.71242e-12	down	yes
ENSMUSG00000056174	Col8a2	95763	ENSMUST00000070132	GO:0001525(angiogenesis);GO:0005201(extracellular matrix structural constituent);GO:0005515(protein binding);GO:0005576(extracellular region);GO:0005581(collagen trimer);GO:0005604(basement membrane);GO:0005615(extracellular space);GO:0007155(cell adhesion);GO:0030198(extracellular matrix organization);GO:0031012(extracellular matrix);GO:0048593(camera-type eye morphogenesis);GO:0050673(epithelia…	NA	NA	NA	collagen, type VIII, alpha 2 [Source:MGI Symbol;Acc:MGI:88464]	protein_coding	R_MMU_1650814(Collagen_biosynthesis_and_modifying_enzymes);R_MMU_1442490(Collagen_degradation);R_MMU_2022090(Assembly_of_collagen_fibrils_and_other_multimeric_structures);R_MMU_8948216(Collagen_chain_trimerization);R_MMU_1474244(Extracellular_matrix_organization);R_MMU_1474228(Degradation_of_the_extracellular_matrix);R_MMU_216083(Integrin_cell_surface_interactions);R_MMU_1474290(Collagen_formatio…	1.38198	4.38517	0.31515	-1.66589	1.73614e-14	9.05932e-13	down	yes
ENSMUSG00000020904	Cfap52	25730;25732;25729	ENSMUST00000021287;ENSMUST00000126766;ENSMUST00000142929	GO:0003674(molecular_function);GO:0005515(protein binding);GO:0005737(cytoplasm);GO:0005929(cilium);GO:0031514(motile cilium);GO:0042995(cell projection);GO:0060271(cilium assembly);GO:0060271(cilium assembly)	NA	NA	NA	cilia and flagella associated protein 52 [Source:MGI Symbol;Acc:MGI:1919110]	protein_coding;processed_transcript	NA	2.2597	7.16078	0.315566	-1.66399	3.90306e-14	1.92879e-12	down	yes
ENSMUSG00000051590	Map3k19	12318;12322;12323	ENSMUST00000208183;ENSMUST00000191333;ENSMUST00000061512	GO:0000166(nucleotide binding);GO:0004672(protein kinase activity);GO:0004674(protein serine/threonine kinase activity);GO:0005515(protein binding);GO:0005524(ATP binding);GO:0006468(protein phosphorylation);GO:0016301(kinase activity);GO:0016310(phosphorylation);GO:0016740(transferase activity);GO:0016740(transferase activity)	NA	NA	NA	mitogen-activated protein kinase kinase kinase 19 [Source:MGI Symbol;Acc:MGI:1203481]	protein_coding	NA	0.640474	2.0253	0.316236	-1.66093	2.54326e-13	1.07583e-11	down	yes
ENSMUSG00000071550	Cfap44	56158;56161;56163;56162;56159;56157;56160	ENSMUST00000099742;ENSMUST00000142648;ENSMUST00000127303;ENSMUST00000128916;ENSMUST00000136514;ENSMUST00000147988;ENSMUST00000120049	GO:0000226(microtubule cytoskeleton organization);GO:0005515(protein binding);GO:0005575(cellular_component);GO:0005737(cytoplasm);GO:0005856(cytoskeleton);GO:0005929(cilium);GO:0005930(axoneme);GO:0006508(proteolysis);GO:0007288(sperm axoneme assembly);GO:0008233(peptidase activity);GO:0030317(flagellated sperm motility);GO:0031514(motile cilium);GO:0042995(cell projection);GO:0060271(cilium ass…	NA	NA	NA	cilia and flagella associated protein 44 [Source:MGI Symbol;Acc:MGI:1277238]	protein_coding;retained_intron;processed_transcript;non_stop_decay	NA	2.83215	8.95278	0.316343	-1.66044	8.87074e-16	5.74353e-14	down	yes
ENSMUSG00000069720	4930572O03Rik	99086	ENSMUST00000092696	GO:0003674(molecular_function);GO:0005575(cellular_component);GO:0008150(biological_process)	NA	NA	NA	RIKEN cDNA 4930572O03 gene [Source:MGI Symbol;Acc:MGI:2441686]	protein_coding	NA	1.05508	3.32623	0.317201	-1.65653	4.90482e-10	1.17353e-08	down	yes
ENSMUSG00000020159	Gabrp	23905	ENSMUST00000020366	GO:0004888(transmembrane signaling receptor activity);GO:0004890(GABA-A receptor activity);GO:0005216(ion channel activity);GO:0005230(extracellular ligand-gated ion channel activity);GO:0005254(chloride channel activity);GO:0005886(plasma membrane);GO:0005887(integral component of plasma membrane);GO:0006811(ion transport);GO:0006821(chloride transport);GO:0007165(signal transduction);GO:0007268…	04080(Neuroactive ligand-receptor interaction);04723(Retrograde endocannabinoid signaling);04727(GABAergic synapse);05032(Morphine addiction);05033(Nicotine addiction)	K05189	NA	gamma-aminobutyric acid (GABA) A receptor, pi [Source:MGI Symbol;Acc:MGI:2387597]	protein_coding	NA	15.6111	49.1912	0.317355	-1.65583	5.95303e-16	3.93471e-14	down	yes
ENSMUSG00000025196	Cpn1	72007;72008	ENSMUST00000026210;ENSMUST00000131882	GO:0004180(carboxypeptidase activity);GO:0004181(metallocarboxypeptidase activity);GO:0005576(extracellular region);GO:0005615(extracellular space);GO:0006508(proteolysis);GO:0006518(peptide metabolic process);GO:0008233(peptidase activity);GO:0008237(metallopeptidase activity);GO:0008270(zinc ion binding);GO:0010815(bradykinin catabolic process);GO:0016485(protein processing);GO:0016787(hydrolas…	NA	K01292	EC:3.4.17.3	carboxypeptidase N, polypeptide 1 [Source:MGI Symbol;Acc:MGI:2135874]	protein_coding;retained_intron	R_MMU_977606(Regulation_of_Complement_cascade);R_MMU_166658(Complement_cascade);R_MMU_168256(Immune_System);R_MMU_168249(Innate_Immune_System)	0.724694	2.28319	0.317404	-1.65561	1.6615e-12	6.08691e-11	down	yes
ENSMUSG00000076594	Igkv6-13	110749;110748	ENSMUST00000198184;ENSMUST00000103395	GO:0002377(immunoglobulin production);GO:0005615(extracellular space);GO:0006955(immune response);GO:0006955(immune response)	NA	NA	NA	immunoglobulin kappa variable 6-13 [Source:MGI Symbol;Acc:MGI:1330829]	IG_V_gene	NA	183.287	577.124	0.317588	-1.65477	5.69855e-16	3.78227e-14	down	yes
ENSMUSG00000021879	Dnah12	43642;43643	ENSMUST00000022433;ENSMUST00000073309	GO:0000166(nucleotide binding);GO:0003774(motor activity);GO:0003777(microtubule motor activity);GO:0005524(ATP binding);GO:0005737(cytoplasm);GO:0005856(cytoskeleton);GO:0005929(cilium);GO:0007018(microtubule-based movement);GO:0030286(dynein complex);GO:0042995(cell projection);GO:0042995(cell projection)	05016(Huntington disease);05016(Huntington disease)	K10408	NA	dynein, axonemal, heavy chain 12 [Source:MGI Symbol;Acc:MGI:107720]	protein_coding	NA	2.02783	6.38203	0.31774	-1.65408	1.05929e-15	6.7484e-14	down	yes
ENSMUSG00000039238	Zfp750	31334	ENSMUST00000092298	GO:0000978(RNA polymerase II cis-regulatory region sequence-specific DNA binding);GO:0001228(DNA-binding transcription activator activity, RNA polymerase II-specific);GO:0005634(nucleus);GO:0008544(epidermis development);GO:0030154(cell differentiation);GO:0045944(positive regulation of transcription by RNA polymerase II);GO:0046872(metal ion binding);GO:1990841(promoter-specific chromatin bindin…	NA	NA	NA	zinc finger protein 750 [Source:MGI Symbol;Acc:MGI:2442210]	protein_coding	R_MMU_73857(RNA_Polymerase_II_Transcription);R_MMU_212436(Generic_Transcription_Pathway);R_MMU_74160(Gene_expression_(Transcription))	0.650004	2.04199	0.318319	-1.65145	7.62237e-12	2.43778e-10	down	yes
ENSMUSG00000078490	Cfap74	98340;98348;98345;98338;98347;98344;98337;98336;98341;98343	ENSMUST00000238423;ENSMUST00000144625;ENSMUST00000105619;ENSMUST00000094408;ENSMUST00000144157;ENSMUST00000165947;ENSMUST00000123952;ENSMUST00000129481;ENSMUST00000238620;ENSMUST00000050128	GO:0003674(molecular_function);GO:0005575(cellular_component);GO:0005737(cytoplasm);GO:0005856(cytoskeleton);GO:0005929(cilium);GO:0005930(axoneme);GO:0008150(biological_process);GO:0035082(axoneme assembly);GO:0042995(cell projection);GO:0042995(cell projection)	NA	NA	NA	cilia and flagella associated protein 74 [Source:MGI Symbol;Acc:MGI:1917130]	protein_coding;retained_intron;processed_transcript	NA	1.22433	3.83671	0.31911	-1.64787	5.3161e-15	3.04438e-13	down	yes
ENSMUSG00000037868	Egr2	18514;18518;18516	ENSMUST00000048289;ENSMUST00000127820;ENSMUST00000105438	GO:0000976(transcription regulatory region sequence-specific DNA binding);GO:0000978(RNA polymerase II cis-regulatory region sequence-specific DNA binding);GO:0000981(DNA-binding transcription factor activity, RNA polymerase II-specific);GO:0001102(RNA polymerase II activating transcription factor binding);GO:0001228(DNA-binding transcription activator activity, RNA polymerase II-specific);GO:000…	04625(C-type lectin receptor signaling pathway);05161(Hepatitis B);05166(Human T-cell leukemia virus 1 infection);05203(Viral carcinogenesis);05203(Viral carcinogenesis)	K12496	NA	early growth response 2 [Source:MGI Symbol;Acc:MGI:95296]	protein_coding	R_MMU_166520(Signaling_by_NTRKs);R_MMU_9031628(NGF_stimulated_transcription);R_MMU_187037(Signaling_by_NTRK1_(TRKA));R_MMU_9006934(Signaling_by_Receptor_Tyrosine_Kinases);R_MMU_162582(Signal_Transduction);R_MMU_198725(Nuclear_Events_(kinase_and_transcription_factor_activation))	1.42536	4.4495	0.320341	-1.64232	9.82055e-14	4.41313e-12	down	yes
ENSMUSG00000046637	Ttc34	98247;98249;98248	ENSMUST00000207854;ENSMUST00000137684;ENSMUST00000050220	GO:0003674(molecular_function);GO:0005515(protein binding);GO:0005575(cellular_component);GO:0008150(biological_process);GO:0008150(biological_process)	NA	NA	NA	tetratricopeptide repeat domain 34 [Source:MGI Symbol;Acc:MGI:2445205]	protein_coding;retained_intron	NA	0.778593	2.42722	0.320775	-1.64037	3.04523e-13	1.27122e-11	down	yes
ENSMUSG00000096805	Ighv9-1	36404;36403	ENSMUST00000195884;ENSMUST00000103471	GO:0003823(antigen binding);GO:0006910(phagocytosis, recognition);GO:0006911(phagocytosis, engulfment);GO:0006958(complement activation, classical pathway);GO:0009897(external side of plasma membrane);GO:0034987(immunoglobulin receptor binding);GO:0042571(immunoglobulin complex, circulating);GO:0042742(defense response to bacterium);GO:0045087(innate immune response);GO:0050853(B cell receptor si…	NA	NA	NA	immunoglobulin heavy variable 9-1 [Source:MGI Symbol;Acc:MGI:4439911]	IG_V_gene	NA	26.7068	83.1654	0.321128	-1.63878	1.18021e-14	6.41154e-13	down	yes
ENSMUSG00000110427	4933406B17Rik	132639;132640	ENSMUST00000212602;ENSMUST00000212927	NA	NA	NA	NA	RIKEN cDNA 4933406B17 gene [Source:MGI Symbol;Acc:MGI:1918290]	lincRNA	NA	0.612173	1.90322	0.321651	-1.63643	2.73743e-12	9.56473e-11	down	yes
ENSMUSG00000094124	Ighv1-74	36587;36588	ENSMUST00000103543;ENSMUST00000196587	GO:0003823(antigen binding);GO:0006910(phagocytosis, recognition);GO:0006911(phagocytosis, engulfment);GO:0006958(complement activation, classical pathway);GO:0009897(external side of plasma membrane);GO:0034987(immunoglobulin receptor binding);GO:0042571(immunoglobulin complex, circulating);GO:0042742(defense response to bacterium);GO:0045087(innate immune response);GO:0050853(B cell receptor si…	NA	NA	NA	immunoglobulin heavy variable V1-74 [Source:MGI Symbol;Acc:MGI:4439634]	IG_V_gene	R_MMU_2871809(FCERI_mediated_Ca+2_mobilization);R_MMU_977606(Regulation_of_Complement_cascade);R_MMU_5653656(Vesicle_mediated_transport);R_MMU_2029481(FCGR_activation);R_MMU_2029480(Fcgamma_receptor_(FCGR)_dependent_phagocytosis);R_MMU_983705(Signaling_by_the_B_Cell_Receptor_(BCR));R_MMU_109582(Hemostasis);R_MMU_173623(Classical_antibody_mediated_complement_activation);R_MMU_166663(Initial_trigge…	15.9534	49.5597	0.321903	-1.6353	7.84226e-14	3.60585e-12	down	yes
ENSMUSG00000020758	Itgb4	30465;30468;30467;30473;30469;30466	ENSMUST00000106461;ENSMUST00000106460;ENSMUST00000151691;ENSMUST00000130286;ENSMUST00000068981;ENSMUST00000169928	GO:0001664(G protein-coupled receptor binding);GO:0005178(integrin binding);GO:0005515(protein binding);GO:0005604(basement membrane);GO:0005730(nucleolus);GO:0005737(cytoplasm);GO:0005886(plasma membrane);GO:0005925(focal adhesion);GO:0005938(cell cortex);GO:0006914(autophagy);GO:0007154(cell communication);GO:0007155(cell adhesion);GO:0007160(cell-matrix adhesion);GO:0007229(integrin-mediated s…	04151(PI3K-Akt signaling pathway);04510(Focal adhesion);04512(ECM-receptor interaction);04810(Regulation of actin cytoskeleton);05165(Human papillomavirus infection);05410(Hypertrophic cardiomyopathy (HCM));05412(Arrhythmogenic right ventricular cardiomyopathy (ARVC));05414(Dilated cardiomyopathy (DCM));05414(Dilated cardiomyopathy (DCM))	K06525	NA	integrin beta 4 [Source:MGI Symbol;Acc:MGI:96613]	protein_coding;processed_transcript	R_MMU_3000171(Non_integrin_membrane_ECM_interactions);R_MMU_3000157(Laminin_interactions);R_MMU_1474244(Extracellular_matrix_organization);R_MMU_446728(Cell_junction_organization);R_MMU_3000170(Syndecan_interactions);R_MMU_1500931(Cell_Cell_communication);R_MMU_446107(Type_I_hemidesmosome_assembly)	0.954397	2.95924	0.322514	-1.63257	4.68308e-14	2.25798e-12	down	yes
ENSMUSG00000032595	Cdhr4	141018;141027;141031;141021;141032;141020;141022;141025;141019;141024;141029;141023;141030;141026	ENSMUST00000177173;ENSMUST00000177516;ENSMUST00000177508;ENSMUST00000177226;ENSMUST00000176373;ENSMUST00000176196;ENSMUST00000177093;ENSMUST00000176183;ENSMUST00000176306;ENSMUST00000176919;ENSMUST00000175802;ENSMUST00000035215;ENSMUST00000176334;ENSMUST00000175759	GO:0003674(molecular_function);GO:0005509(calcium ion binding);GO:0005886(plasma membrane);GO:0005887(integral component of plasma membrane);GO:0007155(cell adhesion);GO:0007156(homophilic cell adhesion via plasma membrane adhesion molecules);GO:0016020(membrane);GO:0016021(integral component of membrane);GO:0016021(integral component of membrane)	NA	K16504	NA	cadherin-related family member 4 [Source:MGI Symbol;Acc:MGI:1916648]	protein_coding;retained_intron;processed_transcript;nonsense_mediated_decay	NA	11.2246	34.788	0.322657	-1.63193	1.8704e-15	1.13679e-13	down	yes
ENSMUSG00000085407	1700095J03Rik	124784	ENSMUST00000143715	NA	NA	NA	NA	RIKEN cDNA 1700095J03 gene [Source:MGI Symbol;Acc:MGI:1921543]	antisense	NA	0.460839	1.42729	0.322876	-1.63095	2.77079e-08	4.65604e-07	down	yes
ENSMUSG00000076434	Wfdc3	82703;82702;82701	ENSMUST00000130227;ENSMUST00000109328;ENSMUST00000103096	GO:0004867(serine-type endopeptidase inhibitor activity);GO:0005576(extracellular region);GO:0005615(extracellular space);GO:0010466(negative regulation of peptidase activity);GO:0010951(negative regulation of endopeptidase activity);GO:0019731(antibacterial humoral response);GO:0030414(peptidase inhibitor activity);GO:0045087(innate immune response);GO:0045087(innate immune response)	NA	NA	NA	WAP four-disulfide core domain 3 [Source:MGI Symbol;Acc:MGI:1923897]	processed_transcript;protein_coding	NA	0.639074	1.97001	0.324401	-1.62415	7.98601e-11	2.21472e-09	down	yes
ENSMUSG00000054383	Pnma1	34344	ENSMUST00000061425	GO:0002437(inflammatory response to antigenic stimulus);GO:0003674(molecular_function);GO:0005634(nucleus);GO:0005730(nucleolus);GO:0005737(cytoplasm)	NA	NA	NA	paraneoplastic antigen MA1 [Source:MGI Symbol;Acc:MGI:2180564]	protein_coding	NA	0.606063	1.86559	0.324864	-1.62209	3.69198e-10	8.92773e-09	down	yes
ENSMUSG00000072188	Gm10354	99073	ENSMUST00000096953	GO:0003674(molecular_function);GO:0005575(cellular_component);GO:0008150(biological_process)	NA	NA	NA	predicted gene 10354 [Source:MGI Symbol;Acc:MGI:3809109]	protein_coding	NA	1.18511	3.64576	0.325065	-1.6212	2.87478e-10	7.07017e-09	down	yes
ENSMUSG00000110266	Gm32742	137425	ENSMUST00000210433	NA	NA	NA	NA	predicted gene, 32742 [Source:MGI Symbol;Acc:MGI:5591901]	protein_coding	NA	0.178963	0.549896	0.325449	-1.6195	2.32778e-10	5.84266e-09	down	yes
ENSMUSG00000085408	C530005A16Rik	94889	ENSMUST00000142815	NA	NA	NA	NA	RIKEN cDNA C530005A16 gene [Source:MGI Symbol;Acc:MGI:3612454]	processed_transcript	NA	1.36063	4.17117	0.326199	-1.61618	1.3447e-12	4.99553e-11	down	yes
ENSMUSG00000094006	Igkv4-59	110662	ENSMUST00000103354	GO:0002377(immunoglobulin production);GO:0005615(extracellular space);GO:0006955(immune response)	NA	NA	NA	immunoglobulin kappa variable 4-59 [Source:MGI Symbol;Acc:MGI:3646808]	IG_V_gene	NA	276.995	847.554	0.326817	-1.61344	2.26504e-15	1.361e-13	down	yes
ENSMUSG00000039552	Rsph4a	17191	ENSMUST00000169670	GO:0001534(radial spoke);GO:0001535(radial spoke head);GO:0003341(cilium movement);GO:0003674(molecular_function);GO:0005515(protein binding);GO:0005654(nucleoplasm);GO:0005730(nucleolus);GO:0005737(cytoplasm);GO:0005856(cytoskeleton);GO:0005929(cilium);GO:0005930(axoneme);GO:0035082(axoneme assembly);GO:0042995(cell projection);GO:0060271(cilium assembly);GO:0060294(cilium movement involved in c…	NA	K19756	NA	radial spoke head 4 homolog A (Chlamydomonas) [Source:MGI Symbol;Acc:MGI:3027894]	protein_coding	NA	4.10619	12.5373	0.327517	-1.61036	9.53847e-15	5.30908e-13	down	yes
ENSMUSG00000024892	Pcx	69001;69000	ENSMUST00000224726;ENSMUST00000068004	GO:0000166(nucleotide binding);GO:0003824(catalytic activity);GO:0004736(pyruvate carboxylase activity);GO:0005524(ATP binding);GO:0005737(cytoplasm);GO:0005739(mitochondrion);GO:0006090(pyruvate metabolic process);GO:0006094(gluconeogenesis);GO:0009374(biotin binding);GO:0010629(negative regulation of gene expression);GO:0016874(ligase activity);GO:0019074(viral RNA genome packaging);GO:0042802(…	00020(Citrate cycle (TCA cycle));00620(Pyruvate metabolism);00620(Pyruvate metabolism)	K01958	EC:6.4.1.1	pyruvate carboxylase [Source:MGI Symbol;Acc:MGI:97520]	protein_coding	R_MMU_196854(Metabolism_of_vitamins_and_cofactors);R_MMU_71387(Metabolism_of_carbohydrates);R_MMU_1430728(Metabolism);R_MMU_70263(Gluconeogenesis);R_MMU_70326(Glucose_metabolism);R_MMU_196849(Metabolism_of_water_soluble_vitamins_and_cofactors);R_MMU_196780(Biotin_transport_and_metabolism)	5.31077	16.2143	0.327536	-1.61028	5.21532e-15	2.99749e-13	down	yes
ENSMUSG00000025007	Aldh18a1	71768;71770;71771;71769	ENSMUST00000025979;ENSMUST00000175967;ENSMUST00000134749;ENSMUST00000155613	GO:0000166(nucleotide binding);GO:0003824(catalytic activity);GO:0004349(glutamate 5-kinase activity);GO:0004350(glutamate-5-semialdehyde dehydrogenase activity);GO:0005524(ATP binding);GO:0005737(cytoplasm);GO:0005739(mitochondrion);GO:0005743(mitochondrial inner membrane);GO:0006536(glutamate metabolic process);GO:0006561(proline biosynthetic process);GO:0006592(ornithine biosynthetic process);…	00330(Arginine and proline metabolism);00330(Arginine and proline metabolism)	K12657	1.2.1.41;EC:2.7.2.11	aldehyde dehydrogenase 18 family, member A1 [Source:MGI Symbol;Acc:MGI:1888908]	protein_coding;retained_intron	R_MMU_1430728(Metabolism);R_MMU_8964539(Glutamate_and_glutamine_metabolism);R_MMU_71291(Metabolism_of_amino_acids_and_derivatives)	1.70913	5.21246	0.327894	-1.6087	9.42003e-14	4.25726e-12	down	yes
ENSMUSG00000085971	Gm15411	107377;107380	ENSMUST00000133243;ENSMUST00000202128	NA	NA	NA	NA	predicted gene 15411 [Source:MGI Symbol;Acc:MGI:3705213]	lincRNA;retained_intron	NA	0.327139	0.995965	0.328465	-1.60619	1.56589e-10	4.09222e-09	down	yes
ENSMUSG00000096638	Ighv2-9	36385	ENSMUST00000103451	GO:0003823(antigen binding);GO:0006910(phagocytosis, recognition);GO:0006911(phagocytosis, engulfment);GO:0006958(complement activation, classical pathway);GO:0009897(external side of plasma membrane);GO:0034987(immunoglobulin receptor binding);GO:0042571(immunoglobulin complex, circulating);GO:0042742(defense response to bacterium);GO:0045087(innate immune response);GO:0050853(B cell receptor si…	NA	NA	NA	immunoglobulin heavy variable 2-9 [Source:MGI Symbol;Acc:MGI:4439624]	IG_V_gene	NA	46.0225	140.089	0.328523	-1.60593	9.4621e-15	5.28512e-13	down	yes
ENSMUSG00000054150	Syne3	35453;35455	ENSMUST00000067005;ENSMUST00000095439	GO:0005515(protein binding);GO:0005634(nucleus);GO:0005635(nuclear envelope);GO:0005640(nuclear outer membrane);GO:0005737(cytoplasm);GO:0005783(endoplasmic reticulum);GO:0005791(rough endoplasmic reticulum);GO:0007010(cytoskeleton organization);GO:0007097(nuclear migration);GO:0008092(cytoskeletal protein binding);GO:0008360(regulation of cell shape);GO:0016020(membrane);GO:0016021(integral comp…	NA	K21761	NA	spectrin repeat containing, nuclear envelope family member 3 [Source:MGI Symbol;Acc:MGI:2442408]	protein_coding	NA	0.199906	0.608328	0.328615	-1.60553	2.26604e-09	4.82499e-08	down	yes
ENSMUSG00000076587	Igkv6-20	110733	ENSMUST00000103388	GO:0002377(immunoglobulin production);GO:0005615(extracellular space);GO:0006955(immune response)	NA	NA	NA	immunoglobulin kappa variable 6-20 [Source:MGI Symbol;Acc:MGI:1330836]	IG_V_gene	NA	26.4626	80.3708	0.329256	-1.60272	3.54683e-14	1.75823e-12	down	yes
ENSMUSG00000027359	Slc27a2	80315;80318	ENSMUST00000061491;ENSMUST00000150947	GO:0000038(very long-chain fatty acid metabolic process);GO:0000166(nucleotide binding);GO:0001561(fatty acid alpha-oxidation);GO:0001676(long-chain fatty acid metabolic process);GO:0003824(catalytic activity);GO:0003996(acyl-CoA ligase activity);GO:0004467(long-chain fatty acid-CoA ligase activity);GO:0005324(long-chain fatty acid transporter activity);GO:0005524(ATP binding);GO:0005739(mitochon…	03320(PPAR signaling pathway);04146(Peroxisome);04931(Insulin resistance);04931(Insulin resistance)	K08746	6.2.1.3;EC:6.2.1.-	solute carrier family 27 (fatty acid transporter), member 2 [Source:MGI Symbol;Acc:MGI:1347099]	protein_coding;processed_transcript	R_MMU_390918(Peroxisomal_lipid_metabolism);R_MMU_9033241(Peroxisomal_protein_import);R_MMU_9609507(Protein_localization);R_MMU_556833(Metabolism_of_lipids);R_MMU_389599(Alpha_oxidation_of_phytanate);R_MMU_1430728(Metabolism);R_MMU_193368(Synthesis_of_bile_acids_and_bile_salts_via_7alpha_hydroxycholesterol);R_MMU_8978868(Fatty_acid_metabolism);R_MMU_168256(Immune_System);R_MMU_8957322(Metabolism_o…	0.546418	1.65679	0.329805	-1.60032	3.82702e-11	1.11391e-09	down	yes
ENSMUSG00000028544	Slc5a9	94638;94644;94645;94642	ENSMUST00000102721;ENSMUST00000149922;ENSMUST00000131772;ENSMUST00000154838	GO:0005412(glucose:sodium symporter activity);GO:0005886(plasma membrane);GO:0006811(ion transport);GO:0006814(sodium ion transport);GO:0016020(membrane);GO:0016021(integral component of membrane);GO:0022857(transmembrane transporter activity);GO:0055085(transmembrane transport);GO:1904659(glucose transmembrane transport);GO:1904659(glucose transmembrane transport)	NA	K14389	NA	solute carrier family 5 (sodium/glucose cotransporter), member 9 [Source:MGI Symbol;Acc:MGI:2140201]	protein_coding;processed_transcript	R_MMU_425407(SLC_mediated_transmembrane_transport);R_MMU_382551(Transport_of_small_molecules);R_MMU_189200(Cellular_hexose_transport)	0.226109	0.685394	0.329896	-1.59992	2.8693e-09	5.96536e-08	down	yes
ENSMUSG00000040978	Gm11992	23172	ENSMUST00000043285	GO:0003674(molecular_function);GO:0005575(cellular_component);GO:0008150(biological_process)	NA	NA	NA	predicted gene 11992 [Source:MGI Symbol;Acc:MGI:3651127]	protein_coding	NA	1.29958	3.93797	0.330012	-1.59941	2.95927e-12	1.0272e-10	down	yes
ENSMUSG00000026961	Lrrc26	74167	ENSMUST00000028337	GO:0005249(voltage-gated potassium channel activity);GO:0005515(protein binding);GO:0005737(cytoplasm);GO:0005856(cytoskeleton);GO:0005886(plasma membrane);GO:0005887(integral component of plasma membrane);GO:0006811(ion transport);GO:0008076(voltage-gated potassium channel complex);GO:0015459(potassium channel regulator activity);GO:0016020(membrane);GO:0016021(integral component of membrane);GO…	NA	NA	NA	leucine rich repeat containing 26 [Source:MGI Symbol;Acc:MGI:2385129]	protein_coding	NA	3.49477	10.5897	0.330015	-1.5994	7.13597e-13	2.83704e-11	down	yes
ENSMUSG00000036330	Slc18a1	130628;130631	ENSMUST00000037478;ENSMUST00000147674	GO:0005335(serotonin:sodium symporter activity);GO:0005737(cytoplasm);GO:0006836(neurotransmitter transport);GO:0008504(monoamine transmembrane transporter activity);GO:0015842(aminergic neurotransmitter loading into synaptic vesicle);GO:0016020(membrane);GO:0016021(integral component of membrane);GO:0019899(enzyme binding);GO:0022857(transmembrane transporter activity);GO:0030054(cell junction);…	04721(Synaptic vesicle cycle);04726(Serotonergic synapse);04728(Dopaminergic synapse);05012(Parkinson disease);05030(Cocaine addiction);05031(Amphetamine addiction);05034(Alcoholism);05034(Alcoholism)	K08155	NA	solute carrier family 18 (vesicular monoamine), member 1 [Source:MGI Symbol;Acc:MGI:106684]	protein_coding;retained_intron	R_MMU_442660(Na+/Cl__dependent_neurotransmitter_transporters);R_MMU_425407(SLC_mediated_transmembrane_transport);R_MMU_382551(Transport_of_small_molecules);R_MMU_425366(Transport_of_bile_salts_and_organic_acids,_metal_ions_and_amine_compounds)	0.184029	0.557155	0.330301	-1.59815	9.31566e-09	1.73241e-07	down	yes
ENSMUSG00000022132	Cldn10	48071;48069	ENSMUST00000100314;ENSMUST00000071546	GO:0005198(structural molecule activity);GO:0005515(protein binding);GO:0005737(cytoplasm);GO:0005783(endoplasmic reticulum);GO:0005886(plasma membrane);GO:0005923(bicellular tight junction);GO:0006811(ion transport);GO:0007155(cell adhesion);GO:0016020(membrane);GO:0016021(integral component of membrane);GO:0016338(calcium-independent cell-cell adhesion via plasma membrane cell-adhesion molecule…	04514(Cell adhesion molecules (CAMs));04530(Tight junction);04670(Leukocyte transendothelial migration);05160(Hepatitis C);05160(Hepatitis C)	K06087	NA	claudin 10 [Source:MGI Symbol;Acc:MGI:1913101]	protein_coding	NA	5.06487	15.3127	0.330763	-1.59613	2.56221e-14	1.30689e-12	down	yes
ENSMUSG00000086822	5330413P13Rik	80880;80883;80884;80881	ENSMUST00000143453;ENSMUST00000150466;ENSMUST00000140443;ENSMUST00000210606	NA	NA	NA	NA	RIKEN cDNA 5330413P13 gene [Source:MGI Symbol;Acc:MGI:3041161]	lincRNA	NA	0.302518	0.910549	0.332237	-1.58972	1.6706e-10	4.31607e-09	down	yes
ENSMUSG00000039092	Sptlc3	81093;81094	ENSMUST00000110083;ENSMUST00000047370	GO:0003824(catalytic activity);GO:0004758(serine C-palmitoyltransferase activity);GO:0005737(cytoplasm);GO:0005783(endoplasmic reticulum);GO:0005789(endoplasmic reticulum membrane);GO:0006629(lipid metabolic process);GO:0006665(sphingolipid metabolic process);GO:0009058(biosynthetic process);GO:0016020(membrane);GO:0016021(integral component of membrane);GO:0016740(transferase activity);GO:001674…	00600(Sphingolipid metabolism);04071(Sphingolipid signaling pathway);04071(Sphingolipid signaling pathway)	K00654	EC:2.3.1.50	serine palmitoyltransferase, long chain base subunit 3 [Source:MGI Symbol;Acc:MGI:2444678]	protein_coding	R_MMU_556833(Metabolism_of_lipids);R_MMU_1430728(Metabolism);R_MMU_1660661(Sphingolipid_de_novo_biosynthesis);R_MMU_428157(Sphingolipid_metabolism)	0.849553	2.5551	0.332493	-1.5886	1.95958e-11	5.93221e-10	down	yes
ENSMUSG00000028678	Kif2c	95017;95019;95020;95022	ENSMUST00000065896;ENSMUST00000132868;ENSMUST00000142205;ENSMUST00000141675	GO:0000166(nucleotide binding);GO:0000775(chromosome, centromeric region);GO:0000776(kinetochore);GO:0000777(condensed chromosome kinetochore);GO:0003774(motor activity);GO:0003777(microtubule motor activity);GO:0005524(ATP binding);GO:0005634(nucleus);GO:0005694(chromosome);GO:0005737(cytoplasm);GO:0005813(centrosome);GO:0005819(spindle);GO:0005856(cytoskeleton);GO:0005871(kinesin complex);GO:00…	NA	K10393	NA	kinesin family member 2C [Source:MGI Symbol;Acc:MGI:1921054]	protein_coding;retained_intron	R_MMU_5653656(Vesicle_mediated_transport);R_MMU_69620(Cell_Cycle_Checkpoints);R_MMU_109582(Hemostasis);R_MMU_6811434(COPI_dependent_Golgi_to_ER_retrograde_traffic);R_MMU_9648025(EML4_and_NUDC_in_mitotic_spindle_formation);R_MMU_983231(Factors_involved_in_megakaryocyte_development_and_platelet_production);R_MMU_2467813(Separation_of_Sister_Chromatids);R_MMU_1640170(Cell_Cycle);R_MMU_141444(Amplifi…	0.285039	0.856749	0.332699	-1.58771	2.91148e-09	6.02934e-08	down	yes
ENSMUSG00000113258	Gm7446	37208	ENSMUST00000221035	NA	NA	NA	NA	predicted gene 7446 [Source:MGI Symbol;Acc:MGI:3644947]	processed_pseudogene	NA	2.44399	7.34474	0.332753	-1.58748	4.6529e-12	1.55715e-10	down	yes
ENSMUSG00000076618	Ighj4	36308	ENSMUST00000103427	NA	NA	NA	NA	immunoglobulin heavy joining 4 [Source:MGI Symbol;Acc:MGI:4439658]	IG_J_gene	NA	540.177	1621.83	0.333067	-1.58612	1.07495e-14	5.94145e-13	down	yes
ENSMUSG00000026452	Syt2	12836;12837	ENSMUST00000121990;ENSMUST00000187702	GO:0005544(calcium-dependent phospholipid binding);GO:0007269(neurotransmitter secretion);GO:0008021(synaptic vesicle);GO:0016020(membrane);GO:0016021(integral component of membrane);GO:0030054(cell junction);GO:0030672(synaptic vesicle membrane);GO:0031410(cytoplasmic vesicle);GO:0042584(chromaffin granule membrane);GO:0045202(synapse);GO:1903861(positive regulation of dendrite extension);GO:190…	NA	K19902	NA	synaptotagmin II [Source:MGI Symbol;Acc:MGI:99666]	protein_coding;processed_transcript	R_MMU_5653656(Vesicle_mediated_transport);R_MMU_8856825(Cargo_recognition_for_clathrin_mediated_endocytosis);R_MMU_199991(Membrane_Trafficking);R_MMU_8856828(Clathrin_mediated_endocytosis)	0.128034	0.383807	0.33359	-1.58385	1.42432e-08	2.57042e-07	down	yes
ENSMUSG00000019892	Lrriq1	21148;21147;21150;21153;21152	ENSMUST00000166240;ENSMUST00000218841;ENSMUST00000217834;ENSMUST00000123364;ENSMUST00000020043	GO:0005515(protein binding);GO:0005737(cytoplasm);GO:0008150(biological_process);GO:0019901(protein kinase binding);GO:0019901(protein kinase binding)	NA	NA	NA	leucine-rich repeats and IQ motif containing 1 [Source:MGI Symbol;Acc:MGI:1922228]	protein_coding;retained_intron	NA	0.328769	0.984631	0.333901	-1.58251	5.14656e-11	1.46834e-09	down	yes
ENSMUSG00000023272	Creld2	51989	ENSMUST00000024042	GO:0003756(protein disulfide isomerase activity);GO:0005201(extracellular matrix structural constituent);GO:0005509(calcium ion binding);GO:0005615(extracellular space);GO:0005783(endoplasmic reticulum);GO:0005794(Golgi apparatus);GO:0008150(biological_process);GO:0016853(isomerase activity)	NA	NA	NA	cysteine-rich with EGF-like domains 2 [Source:MGI Symbol;Acc:MGI:1923987]	protein_coding	NA	31.2017	93.3983	0.334072	-1.58177	9.83224e-15	5.45345e-13	down	yes
ENSMUSG00000021553	Slc28a3	39623;39621;39626;39625	ENSMUST00000022036;ENSMUST00000140760;ENSMUST00000151675;ENSMUST00000148396	GO:0001895(retina homeostasis);GO:0005337(nucleoside transmembrane transporter activity);GO:0005415(nucleoside:sodium symporter activity);GO:0005887(integral component of plasma membrane);GO:0015213(uridine transmembrane transporter activity);GO:0015293(symporter activity);GO:0015389(pyrimidine- and adenine-specific:sodium symporter activity);GO:0015390(purine-specific nucleoside:sodium symporter…	NA	K11536	NA	solute carrier family 28 (sodium-coupled nucleoside transporter), member 3 [Source:MGI Symbol;Acc:MGI:2137361]	protein_coding;nonsense_mediated_decay;retained_intron	R_MMU_83936(Transport_of_nucleosides_and_free_purine_and_pyrimidine_bases_across_the_plasma_membrane);R_MMU_425407(SLC_mediated_transmembrane_transport);R_MMU_382551(Transport_of_small_molecules);R_MMU_425397(Transport_of_vitamins,_nucleosides,_and_related_molecules)	0.112455	0.335972	0.334715	-1.57899	2.91844e-08	4.88781e-07	down	yes
ENSMUSG00000026064	Ptp4a1	8220;8216;8221	ENSMUST00000153681;ENSMUST00000232841;ENSMUST00000130934	GO:0004721(phosphoprotein phosphatase activity);GO:0004725(protein tyrosine phosphatase activity);GO:0004727(prenylated protein tyrosine phosphatase activity);GO:0005634(nucleus);GO:0005737(cytoplasm);GO:0005768(endosome);GO:0005769(early endosome);GO:0005783(endoplasmic reticulum);GO:0005819(spindle);GO:0005856(cytoskeleton);GO:0005886(plasma membrane);GO:0006470(protein dephosphorylation);GO:00…	NA	K18041	EC:3.1.3.48	protein tyrosine phosphatase 4a1 [Source:MGI Symbol;Acc:MGI:1277096]	retained_intron;protein_coding	NA	0.68946	2.05573	0.335385	-1.57611	2.08478e-12	7.43166e-11	down	yes
ENSMUSG00000084960	B430010I23Rik	129797;129796	ENSMUST00000152188;ENSMUST00000123703	NA	NA	NA	NA	RIKEN cDNA B430010I23 gene [Source:MGI Symbol;Acc:MGI:1926099]	antisense	NA	0.492459	1.46663	0.335776	-1.57443	3.58669e-10	8.71297e-09	down	yes
ENSMUSG00000094356	Igkv8-28	110718;110717	ENSMUST00000197525;ENSMUST00000103380	GO:0002377(immunoglobulin production);GO:0005615(extracellular space);GO:0006955(immune response);GO:0006955(immune response)	NA	NA	NA	immunoglobulin kappa variable 8-28 [Source:MGI Symbol;Acc:MGI:3642251]	IG_V_gene	NA	64.0494	190.695	0.335874	-1.57401	1.99591e-14	1.03186e-12	down	yes
ENSMUSG00000076541	Igkv4-79	110630	ENSMUST00000103342	GO:0002377(immunoglobulin production);GO:0005615(extracellular space);GO:0006955(immune response)	NA	NA	NA	immunoglobulin kappa variable 4-79 [Source:MGI Symbol;Acc:MGI:2685040]	IG_V_gene	NA	137.175	408.065	0.33616	-1.57278	1.26322e-14	6.81583e-13	down	yes
ENSMUSG00000074981	Dcdc5	79172;79177;79170;79175	ENSMUST00000122388;ENSMUST00000037284;ENSMUST00000126340;ENSMUST00000148101	NA	NA	NA	NA	doublecortin domain containing 5 [Source:MGI Symbol;Acc:MGI:3045363]	transcribed_unitary_pseudogene;retained_intron;processed_transcript	NA	0.237637	0.705645	0.336766	-1.57018	8.82096e-11	2.40838e-09	down	yes
ENSMUSG00000024215	Spdef	60199;60202;60203;60200	ENSMUST00000025054;ENSMUST00000127622;ENSMUST00000114870;ENSMUST00000233880	GO:0000122(negative regulation of transcription by RNA polymerase II);GO:0000981(DNA-binding transcription factor activity, RNA polymerase II-specific);GO:0003677(DNA binding);GO:0003700(DNA-binding transcription factor activity);GO:0005634(nucleus);GO:0006355(regulation of transcription, DNA-templated);GO:0006357(regulation of transcription by RNA polymerase II);GO:0010454(negative regulation of…	NA	K09442	NA	SAM pointed domain containing ets transcription factor [Source:MGI Symbol;Acc:MGI:1353422]	protein_coding;retained_intron	NA	0.920797	2.73366	0.336836	-1.56988	8.68669e-11	2.37991e-09	down	yes
ENSMUSG00000026611	Spata17	15609;15610;15621	ENSMUST00000183819;ENSMUST00000027908;ENSMUST00000183469	GO:0003674(molecular_function);GO:0005515(protein binding);GO:0005516(calmodulin binding);GO:0005575(cellular_component);GO:0005737(cytoplasm);GO:0008150(biological_process);GO:0008150(biological_process)	NA	NA	NA	spermatogenesis associated 17 [Source:MGI Symbol;Acc:MGI:1921967]	protein_coding;processed_transcript	NA	0.612411	1.81687	0.337069	-1.56889	2.36697e-10	5.93162e-09	down	yes
ENSMUSG00000027356	Fermt1	80984;80985;80987	ENSMUST00000134937;ENSMUST00000038280;ENSMUST00000143981	GO:0001954(positive regulation of cell-matrix adhesion);GO:0005178(integrin binding);GO:0005737(cytoplasm);GO:0005829(cytosol);GO:0005856(cytoskeleton);GO:0005886(plasma membrane);GO:0005925(focal adhesion);GO:0007155(cell adhesion);GO:0007160(cell-matrix adhesion);GO:0007229(integrin-mediated signaling pathway);GO:0010629(negative regulation of gene expression);GO:0016020(membrane);GO:0030054(ce…	NA	K17082	NA	fermitin family member 1 [Source:MGI Symbol;Acc:MGI:2443583]	retained_intron;protein_coding;processed_transcript	NA	0.870345	2.58153	0.337143	-1.56857	1.08641e-12	4.15271e-11	down	yes
ENSMUSG00000076676	Ighv12-3	36434	ENSMUST00000103485	GO:0003823(antigen binding);GO:0006910(phagocytosis, recognition);GO:0006911(phagocytosis, engulfment);GO:0006958(complement activation, classical pathway);GO:0009897(external side of plasma membrane);GO:0034987(immunoglobulin receptor binding);GO:0042571(immunoglobulin complex, circulating);GO:0042742(defense response to bacterium);GO:0045087(innate immune response);GO:0050853(B cell receptor si…	NA	NA	NA	immunoglobulin heavy variable V12-3 [Source:MGI Symbol;Acc:MGI:3646760]	IG_V_gene	R_MMU_2871809(FCERI_mediated_Ca+2_mobilization);R_MMU_977606(Regulation_of_Complement_cascade);R_MMU_5653656(Vesicle_mediated_transport);R_MMU_2029481(FCGR_activation);R_MMU_2029480(Fcgamma_receptor_(FCGR)_dependent_phagocytosis);R_MMU_983705(Signaling_by_the_B_Cell_Receptor_(BCR));R_MMU_109582(Hemostasis);R_MMU_173623(Classical_antibody_mediated_complement_activation);R_MMU_166663(Initial_trigge…	3.89513	11.5423	0.337465	-1.56719	1.94849e-09	4.21676e-08	down	yes
ENSMUSG00000047222	Rnase2a	45302	ENSMUST00000061936	GO:0003676(nucleic acid binding);GO:0004518(nuclease activity);GO:0004519(endonuclease activity);GO:0004540(ribonuclease activity);GO:0016787(hydrolase activity);GO:0090305(nucleic acid phosphodiester bond hydrolysis);GO:0090501(RNA phosphodiester bond hydrolysis)	NA	NA	NA	ribonuclease, RNase A family, 2A (liver, eosinophil-derived neurotoxin) [Source:MGI Symbol;Acc:MGI:1890465]	protein_coding	R_MMU_6803157(Antimicrobial_peptides);R_MMU_168256(Immune_System);R_MMU_6798695(Neutrophil_degranulation);R_MMU_168249(Innate_Immune_System)	15.6678	46.4131	0.337574	-1.56672	9.58036e-14	4.31742e-12	down	yes
ENSMUSG00000102364	Ighv8-5	36521	ENSMUST00000194257	GO:0003823(antigen binding);GO:0006910(phagocytosis, recognition);GO:0006911(phagocytosis, engulfment);GO:0006958(complement activation, classical pathway);GO:0009897(external side of plasma membrane);GO:0034987(immunoglobulin receptor binding);GO:0042571(immunoglobulin complex, circulating);GO:0042742(defense response to bacterium);GO:0045087(innate immune response);GO:0050853(B cell receptor si…	NA	NA	NA	immunoglobulin heavy variable V8-5 [Source:MGI Symbol;Acc:MGI:3645478]	IG_V_gene	R_MMU_2871809(FCERI_mediated_Ca+2_mobilization);R_MMU_977606(Regulation_of_Complement_cascade);R_MMU_5653656(Vesicle_mediated_transport);R_MMU_2029481(FCGR_activation);R_MMU_2029480(Fcgamma_receptor_(FCGR)_dependent_phagocytosis);R_MMU_983705(Signaling_by_the_B_Cell_Receptor_(BCR));R_MMU_109582(Hemostasis);R_MMU_173623(Classical_antibody_mediated_complement_activation);R_MMU_166663(Initial_trigge…	39.9518	118.339	0.337605	-1.56659	4.67358e-14	2.25798e-12	down	yes
ENSMUSG00000063779	Chil4	88643;88644	ENSMUST00000082219;ENSMUST00000196128	GO:0005576(extracellular region);GO:0005737(cytoplasm);GO:0005975(carbohydrate metabolic process);GO:0006032(chitin catabolic process);GO:0006954(inflammatory response);GO:0008061(chitin binding);GO:0008061(chitin binding)	NA	K17524	NA	chitinase-like 4 [Source:MGI Symbol;Acc:MGI:1341098]	protein_coding;retained_intron	NA	8.41551	24.8877	0.338139	-1.56431	2.85687e-14	1.44327e-12	down	yes
ENSMUSG00000032226	Gcnt3	138672	ENSMUST00000034751	GO:0000139(Golgi membrane);GO:0002426(immunoglobulin production in mucosal tissue);GO:0003829(beta-1,3-galactosyl-O-glycosyl-glycoprotein beta-1,6-N-acetylglucosaminyltransferase activity);GO:0005794(Golgi apparatus);GO:0006486(protein glycosylation);GO:0006493(protein O-linked glycosylation);GO:0008109(N-acetyllactosaminide beta-1,6-N-acetylglucosaminyltransferase activity);GO:0008375(acetylgluc…	00512(Mucin type O-glycan biosynthesis)	K09662	EC:2.4.1.-	glucosaminyl (N-acetyl) transferase 3, mucin type [Source:MGI Symbol;Acc:MGI:1919327]	protein_coding	R_MMU_913709(O_linked_glycosylation_of_mucins);R_MMU_5173105(O_linked_glycosylation);R_MMU_597592(Post_translational_protein_modification);R_MMU_392499(Metabolism_of_proteins)	0.437564	1.29399	0.338151	-1.56426	1.98265e-10	5.03213e-09	down	yes
ENSMUSG00000042817	Flt3	107267	ENSMUST00000049324	GO:0004672(protein kinase activity);GO:0004713(protein tyrosine kinase activity);GO:0004714(transmembrane receptor protein tyrosine kinase activity);GO:0005524(ATP binding);GO:0005634(nucleus);GO:0005737(cytoplasm);GO:0005783(endoplasmic reticulum);GO:0005829(cytosol);GO:0005886(plasma membrane);GO:0006468(protein phosphorylation);GO:0007169(transmembrane receptor protein tyrosine kinase signalin…	04010(MAPK signaling pathway);04014(Ras signaling pathway);04151(PI3K-Akt signaling pathway);04640(Hematopoietic cell lineage);05200(Pathways in cancer);05202(Transcriptional misregulation in cancer);05221(Acute myeloid leukemia);05230(Central carbon metabolism in cancer)	K05092	EC:2.7.10.1	FMS-like tyrosine kinase 3 [Source:MGI Symbol;Acc:MGI:95559]	protein_coding	NA	0.228987	0.677037	0.338219	-1.56397	1.57097e-09	3.44204e-08	down	yes
ENSMUSG00000033825	Tpsb2	59627;59626;59628;59629	ENSMUST00000069616;ENSMUST00000234477;ENSMUST00000234057;ENSMUST00000234712	GO:0004252(serine-type endopeptidase activity);GO:0006508(proteolysis);GO:0008233(peptidase activity);GO:0008236(serine-type peptidase activity);GO:0016787(hydrolase activity);GO:0016787(hydrolase activity)	NA	K01340	EC:3.4.21.59	tryptase beta 2 [Source:MGI Symbol;Acc:MGI:96942]	protein_coding	NA	4.06326	12.0037	0.338501	-1.56277	4.11574e-13	1.67835e-11	down	yes
ENSMUSG00000085184	4933439K11Rik	14820;14821;14822	ENSMUST00000132370;ENSMUST00000140307;ENSMUST00000169111	NA	NA	NA	NA	RIKEN cDNA 4933439K11 gene [Source:MGI Symbol;Acc:MGI:1918569]	lincRNA;antisense	NA	0.32813	0.966753	0.339415	-1.55888	3.19828e-08	5.31805e-07	down	yes
ENSMUSG00000076614	Ighg1	36293;36292	ENSMUST00000103420;ENSMUST00000194304	GO:0016020(membrane);GO:0016021(integral component of membrane);GO:0016021(integral component of membrane)	NA	NA	NA	immunoglobulin heavy constant gamma 1 (G1m marker) [Source:MGI Symbol;Acc:MGI:96446]	IG_C_gene	R_MMU_977606(Regulation_of_Complement_cascade);R_MMU_2029481(FCGR_activation);R_MMU_2029480(Fcgamma_receptor_(FCGR)_dependent_phagocytosis);R_MMU_173623(Classical_antibody_mediated_complement_activation);R_MMU_166663(Initial_triggering_of_complement);R_MMU_166658(Complement_cascade);R_MMU_2029482(Regulation_of_actin_dynamics_for_phagocytic_cup_formation);R_MMU_168256(Immune_System);R_MMU_166786(C…	2698.08	7935.84	0.339987	-1.55645	1.40934e-14	7.47706e-13	down	yes
ENSMUSG00000089999	Gm6485	88523	ENSMUST00000160676	NA	NA	NA	NA	predicted gene 6485 [Source:MGI Symbol;Acc:MGI:3644007]	transcribed_processed_pseudogene	NA	3.66275	10.7507	0.340699	-1.55343	8.07028e-10	1.84095e-08	down	yes
ENSMUSG00000026301	Iqca	11325;11322	ENSMUST00000212394;ENSMUST00000113094	GO:0000166(nucleotide binding);GO:0003674(molecular_function);GO:0005524(ATP binding);GO:0005737(cytoplasm);GO:0005856(cytoskeleton);GO:0005929(cilium);GO:0008150(biological_process);GO:0031514(motile cilium);GO:0042995(cell projection);GO:0042995(cell projection)	NA	NA	NA	IQ motif containing with AAA domain [Source:MGI Symbol;Acc:MGI:1922168]	protein_coding	NA	2.619	7.68675	0.340716	-1.55336	1.49746e-13	6.56195e-12	down	yes
ENSMUSG00000033826	Dnah8	60846;60856;60844;60867;60854;60862;60857;60860;60845;60855;60848	ENSMUST00000236140;ENSMUST00000235140;ENSMUST00000170651;ENSMUST00000235567;ENSMUST00000236948;ENSMUST00000236870;ENSMUST00000237458;ENSMUST00000235136;ENSMUST00000237551;ENSMUST00000237432;ENSMUST00000236118	GO:0000166(nucleotide binding);GO:0003774(motor activity);GO:0003777(microtubule motor activity);GO:0005524(ATP binding);GO:0005737(cytoplasm);GO:0005856(cytoskeleton);GO:0005874(microtubule);GO:0005929(cilium);GO:0005930(axoneme);GO:0007018(microtubule-based movement);GO:0008569(ATP-dependent microtubule motor activity, minus-end-directed);GO:0030286(dynein complex);GO:0031514(motile cilium);GO:…	05016(Huntington disease);05016(Huntington disease)	K10408	NA	dynein, axonemal, heavy chain 8 [Source:MGI Symbol;Acc:MGI:107714]	protein_coding;retained_intron	NA	0.2067	0.605924	0.341132	-1.5516	1.64083e-12	6.04903e-11	down	yes
ENSMUSG00000035032	Nek11	140483;140484;140488	ENSMUST00000038648;ENSMUST00000177029;ENSMUST00000156256	GO:0000166(nucleotide binding);GO:0004672(protein kinase activity);GO:0004674(protein serine/threonine kinase activity);GO:0005524(ATP binding);GO:0005634(nucleus);GO:0005654(nucleoplasm);GO:0005730(nucleolus);GO:0005737(cytoplasm);GO:0005813(centrosome);GO:0006468(protein phosphorylation);GO:0007049(cell cycle);GO:0007059(chromosome segregation);GO:0016301(kinase activity);GO:0016310(phosphoryla…	NA	K20880	EC:2.7.11.1	NIMA (never in mitosis gene a)-related expressed kinase 11 [Source:MGI Symbol;Acc:MGI:2442276]	protein_coding;nonsense_mediated_decay	NA	0.612701	1.79572	0.3412	-1.55131	3.41455e-11	1.00305e-09	down	yes
ENSMUSG00000076674	Ighv3-8	36429	ENSMUST00000103483	GO:0003823(antigen binding);GO:0006910(phagocytosis, recognition);GO:0006911(phagocytosis, engulfment);GO:0006958(complement activation, classical pathway);GO:0009897(external side of plasma membrane);GO:0034987(immunoglobulin receptor binding);GO:0042571(immunoglobulin complex, circulating);GO:0042742(defense response to bacterium);GO:0045087(innate immune response);GO:0050853(B cell receptor si…	NA	NA	NA	immunoglobulin heavy variable V3-8 [Source:MGI Symbol;Acc:MGI:3645298]	IG_V_gene	R_MMU_2871809(FCERI_mediated_Ca+2_mobilization);R_MMU_977606(Regulation_of_Complement_cascade);R_MMU_5653656(Vesicle_mediated_transport);R_MMU_2029481(FCGR_activation);R_MMU_2029480(Fcgamma_receptor_(FCGR)_dependent_phagocytosis);R_MMU_983705(Signaling_by_the_B_Cell_Receptor_(BCR));R_MMU_109582(Hemostasis);R_MMU_173623(Classical_antibody_mediated_complement_activation);R_MMU_166663(Initial_trigge…	33.4526	97.9843	0.341408	-1.55043	1.16152e-13	5.17563e-12	down	yes
ENSMUSG00000095285	Ighv5-9	36355	ENSMUST00000103448	GO:0003823(antigen binding);GO:0006910(phagocytosis, recognition);GO:0006911(phagocytosis, engulfment);GO:0006958(complement activation, classical pathway);GO:0009897(external side of plasma membrane);GO:0034987(immunoglobulin receptor binding);GO:0042571(immunoglobulin complex, circulating);GO:0042742(defense response to bacterium);GO:0045087(innate immune response);GO:0050853(B cell receptor si…	NA	NA	NA	immunoglobulin heavy variable 5-9 [Source:MGI Symbol;Acc:MGI:4439873]	IG_V_gene	R_MMU_2871809(FCERI_mediated_Ca+2_mobilization);R_MMU_977606(Regulation_of_Complement_cascade);R_MMU_5653656(Vesicle_mediated_transport);R_MMU_2029481(FCGR_activation);R_MMU_2029480(Fcgamma_receptor_(FCGR)_dependent_phagocytosis);R_MMU_983705(Signaling_by_the_B_Cell_Receptor_(BCR));R_MMU_109582(Hemostasis);R_MMU_173623(Classical_antibody_mediated_complement_activation);R_MMU_166663(Initial_trigge…	23.2505	68.064	0.341597	-1.54963	2.34259e-13	9.96259e-12	down	yes
ENSMUSG00000031762	Mt2	132409;132410	ENSMUST00000034214;ENSMUST00000212806	GO:0005634(nucleus);GO:0005737(cytoplasm);GO:0005829(cytosol);GO:0006882(cellular zinc ion homeostasis);GO:0007263(nitric oxide mediated signal transduction);GO:0008144(drug binding);GO:0008270(zinc ion binding);GO:0009617(response to bacterium);GO:0010273(detoxification of copper ion);GO:0035690(cellular response to drug);GO:0036016(cellular response to interleukin-3);GO:0036018(cellular respons…	04978(Mineral absorption);04978(Mineral absorption)	K14739	NA	metallothionein 2 [Source:MGI Symbol;Acc:MGI:97172]	protein_coding	R_MMU_8953897(Cellular_responses_to_external_stimuli);R_MMU_5661231(Metallothioneins_bind_metals);R_MMU_5660526(Response_to_metal_ions)	19.3789	56.6973	0.341796	-1.54879	1.56654e-13	6.82694e-12	down	yes
ENSMUSG00000095589	Ighv1-55	36531	ENSMUST00000103526	GO:0003823(antigen binding);GO:0006910(phagocytosis, recognition);GO:0006911(phagocytosis, engulfment);GO:0006958(complement activation, classical pathway);GO:0009897(external side of plasma membrane);GO:0034987(immunoglobulin receptor binding);GO:0042571(immunoglobulin complex, circulating);GO:0042742(defense response to bacterium);GO:0045087(innate immune response);GO:0050853(B cell receptor si…	NA	NA	NA	immunoglobulin heavy variable 1-55 [Source:MGI Symbol;Acc:MGI:4439716]	IG_V_gene	R_MMU_2871809(FCERI_mediated_Ca+2_mobilization);R_MMU_977606(Regulation_of_Complement_cascade);R_MMU_5653656(Vesicle_mediated_transport);R_MMU_2029481(FCGR_activation);R_MMU_2029480(Fcgamma_receptor_(FCGR)_dependent_phagocytosis);R_MMU_983705(Signaling_by_the_B_Cell_Receptor_(BCR));R_MMU_109582(Hemostasis);R_MMU_173623(Classical_antibody_mediated_complement_activation);R_MMU_166663(Initial_trigge…	8.39312	24.5527	0.341841	-1.5486	8.23219e-12	2.61698e-10	down	yes
ENSMUSG00000068129	Cst7	81455	ENSMUST00000089200	GO:0004869(cysteine-type endopeptidase inhibitor activity);GO:0005576(extracellular region);GO:0005615(extracellular space);GO:0005737(cytoplasm);GO:0005764(lysosome);GO:0005768(endosome);GO:0005770(late endosome);GO:0005771(multivesicular body);GO:0005783(endoplasmic reticulum);GO:0005794(Golgi apparatus);GO:0006955(immune response);GO:0010466(negative regulation of peptidase activity);GO:003041…	NA	K13903	NA	cystatin F (leukocystatin) [Source:MGI Symbol;Acc:MGI:1298217]	protein_coding	NA	1.56569	4.5789	0.341936	-1.5482	8.70247e-10	1.96648e-08	down	yes
ENSMUSG00000027485	Bpifb1	81808;81809;81810	ENSMUST00000081816;ENSMUST00000123017;ENSMUST00000028987	GO:0002227(innate immune response in mucosa);GO:0002376(immune system process);GO:0005576(extracellular region);GO:0005615(extracellular space);GO:0008289(lipid binding);GO:0034144(negative regulation of toll-like receptor 4 signaling pathway);GO:0045087(innate immune response);GO:0045087(innate immune response)	NA	NA	NA	BPI fold containing family B, member 1 [Source:MGI Symbol;Acc:MGI:2137431]	protein_coding;retained_intron	R_MMU_6803157(Antimicrobial_peptides);R_MMU_168256(Immune_System);R_MMU_168249(Innate_Immune_System)	11.856	34.6325	0.342336	-1.54651	3.44014e-14	1.72148e-12	down	yes
ENSMUSG00000113637	Gm7049	39953	ENSMUST00000223520	NA	NA	NA	NA	predicted gene 7049 [Source:MGI Symbol;Acc:MGI:3646400]	processed_pseudogene	NA	0.836007	2.4414	0.34243	-1.54612	2.41979e-09	5.11802e-08	down	yes
ENSMUSG00000061356	Nuggc	46857	ENSMUST00000150897	GO:0000166(nucleotide binding);GO:0003924(GTPase activity);GO:0005525(GTP binding);GO:0005634(nucleus);GO:0006974(cellular response to DNA damage stimulus);GO:0016446(somatic hypermutation of immunoglobulin genes);GO:0016607(nuclear speck);GO:0016787(hydrolase activity);GO:0033262(regulation of nuclear cell cycle DNA replication);GO:0043066(negative regulation of apoptotic process);GO:0071222(cel…	NA	NA	NA	nuclear GTPase, germinal center associated [Source:MGI Symbol;Acc:MGI:2685446]	protein_coding	NA	0.584663	1.70708	0.342494	-1.54585	6.73971e-10	1.56762e-08	down	yes
ENSMUSG00000040875	Osbpl10	141885;141883;141890;141889	ENSMUST00000182384;ENSMUST00000183104;ENSMUST00000182363;ENSMUST00000046627	GO:0001786(phosphatidylserine binding);GO:0005737(cytoplasm);GO:0005829(cytosol);GO:0005856(cytoskeleton);GO:0006629(lipid metabolic process);GO:0006869(lipid transport);GO:0008150(biological_process);GO:0008289(lipid binding);GO:0015248(sterol transporter activity);GO:0015485(cholesterol binding);GO:0015918(sterol transport);GO:0016020(membrane);GO:0032934(sterol binding);GO:0043231(intracellula…	NA	K20465	NA	oxysterol binding protein-like 10 [Source:MGI Symbol;Acc:MGI:1921736]	protein_coding	R_MMU_556833(Metabolism_of_lipids);R_MMU_1430728(Metabolism);R_MMU_1483257(Phospholipid_metabolism);R_MMU_1482801(Acyl_chain_remodelling_of_PS);R_MMU_1483206(Glycerophospholipid_biosynthesis)	1.25468	3.65986	0.342822	-1.54447	7.97398e-13	3.13874e-11	down	yes
ENSMUSG00000022809	Nr1i2	55956	ENSMUST00000023504	GO:0000122(negative regulation of transcription by RNA polymerase II);GO:0000977(RNA polymerase II regulatory region sequence-specific DNA binding);GO:0001228(DNA-binding transcription activator activity, RNA polymerase II-specific);GO:0003677(DNA binding);GO:0003700(DNA-binding transcription factor activity);GO:0003707(steroid hormone receptor activity);GO:0004879(nuclear receptor activity);GO:0…	NA	K08540	NA	nuclear receptor subfamily 1, group I, member 2 [Source:MGI Symbol;Acc:MGI:1337040]	protein_coding	R_MMU_73857(RNA_Polymerase_II_Transcription);R_MMU_212436(Generic_Transcription_Pathway);R_MMU_383280(Nuclear_Receptor_transcription_pathway);R_MMU_597592(Post_translational_protein_modification);R_MMU_392499(Metabolism_of_proteins);R_MMU_3108232(SUMO_E3_ligases_SUMOylate_target_proteins);R_MMU_74160(Gene_expression_(Transcription));R_MMU_4090294(SUMOylation_of_intracellular_receptors);R_MMU_2990…	0.419989	1.22354	0.343259	-1.54263	1.95638e-08	3.42917e-07	down	yes
ENSMUSG00000086742	Gm16201	127040;127039;127044	ENSMUST00000139218;ENSMUST00000134312;ENSMUST00000210415	NA	NA	NA	NA	predicted gene 16201 [Source:MGI Symbol;Acc:MGI:3802153]	processed_transcript	NA	0.315267	0.917156	0.343744	-1.54059	1.85362e-08	3.26347e-07	down	yes
ENSMUSG00000079553	Kifc1	61410;61409;61406;61412	ENSMUST00000173885;ENSMUST00000174507;ENSMUST00000173492;ENSMUST00000172608	GO:0000166(nucleotide binding);GO:0003777(microtubule motor activity);GO:0005515(protein binding);GO:0005524(ATP binding);GO:0005634(nucleus);GO:0005737(cytoplasm);GO:0005768(endosome);GO:0005769(early endosome);GO:0005815(microtubule organizing center);GO:0005819(spindle);GO:0005856(cytoskeleton);GO:0005871(kinesin complex);GO:0005874(microtubule);GO:0007018(microtubule-based movement);GO:000704…	NA	K10405	NA	kinesin family member C1 [Source:MGI Symbol;Acc:MGI:109596]	retained_intron;protein_coding	R_MMU_5653656(Vesicle_mediated_transport);R_MMU_109582(Hemostasis);R_MMU_6811434(COPI_dependent_Golgi_to_ER_retrograde_traffic);R_MMU_983231(Factors_involved_in_megakaryocyte_development_and_platelet_production);R_MMU_983189(Kinesins);R_MMU_168256(Immune_System);R_MMU_8856688(Golgi_to_ER_retrograde_transport);R_MMU_2132295(MHC_class_II_antigen_presentation);R_MMU_199991(Membrane_Trafficking);R_MM…	0.242692	0.706026	0.343744	-1.54059	1.63057e-07	2.37736e-06	down	yes
ENSMUSG00000022479	Vdr	52446;52447	ENSMUST00000023119;ENSMUST00000139656	GO:0000122(negative regulation of transcription by RNA polymerase II);GO:0000791(euchromatin);GO:0000792(heterochromatin);GO:0000902(cell morphogenesis);GO:0000977(RNA polymerase II regulatory region sequence-specific DNA binding);GO:0001501(skeletal system development);GO:0001651(dense fibrillar component);GO:0003677(DNA binding);GO:0003700(DNA-binding transcription factor activity);GO:0003707(s…	04928(Parathyroid hormone synthesis, secretion and action);04961(Endocrine and other factor-regulated calcium reabsorption);04978(Mineral absorption);05152(Tuberculosis);05152(Tuberculosis)	K08539	NA	vitamin D (1,25-dihydroxyvitamin D3) receptor [Source:MGI Symbol;Acc:MGI:103076]	protein_coding;retained_intron	R_MMU_556833(Metabolism_of_lipids);R_MMU_1430728(Metabolism);R_MMU_73857(RNA_Polymerase_II_Transcription);R_MMU_212436(Generic_Transcription_Pathway);R_MMU_383280(Nuclear_Receptor_transcription_pathway);R_MMU_597592(Post_translational_protein_modification);R_MMU_392499(Metabolism_of_proteins);R_MMU_3108232(SUMO_E3_ligases_SUMOylate_target_proteins);R_MMU_8957322(Metabolism_of_steroids);R_MMU_7416…	0.701656	2.0366	0.344524	-1.53732	5.74917e-12	1.8921e-10	down	yes
ENSMUSG00000037973	Itprid1	110030;110031	ENSMUST00000044729;ENSMUST00000169699	GO:0003674(molecular_function);GO:0005102(signaling receptor binding);GO:0005575(cellular_component);GO:0008150(biological_process);GO:0008150(biological_process)	NA	NA	NA	ITPR interacting domain containing 1 [Source:MGI Symbol;Acc:MGI:2685304]	protein_coding;processed_transcript	NA	1.85337	5.37673	0.344702	-1.53658	9.76897e-13	3.77044e-11	down	yes
ENSMUSG00000024173	Tpsab1	59624;59625	ENSMUST00000153118;ENSMUST00000146856	GO:0004252(serine-type endopeptidase activity);GO:0006508(proteolysis);GO:0008233(peptidase activity);GO:0008236(serine-type peptidase activity);GO:0016787(hydrolase activity);GO:0016787(hydrolase activity)	NA	K01340	EC:3.4.21.59	tryptase alpha/beta 1 [Source:MGI Symbol;Acc:MGI:96943]	protein_coding	R_MMU_1474244(Extracellular_matrix_organization);R_MMU_1474228(Degradation_of_the_extracellular_matrix);R_MMU_1592389(Activation_of_Matrix_Metalloproteinases)	3.10988	9.02063	0.344752	-1.53637	9.72644e-13	3.76318e-11	down	yes
ENSMUSG00000074637	Sox2	84770	ENSMUST00000099151	GO:0000976(transcription regulatory region sequence-specific DNA binding);GO:0001228(DNA-binding transcription activator activity, RNA polymerase II-specific);GO:0001649(osteoblast differentiation);GO:0001654(eye development);GO:0001714(endodermal cell fate specification);GO:0003677(DNA binding);GO:0003700(DNA-binding transcription factor activity);GO:0005515(protein binding);GO:0005634(nucleus);…	04390(Hippo signaling pathway);04550(Signaling pathways regulating pluripotency of stem cells)	K16796	NA	SRY (sex determining region Y)-box 2 [Source:MGI Symbol;Acc:MGI:98364]	protein_coding	NA	5.89038	17.0383	0.345715	-1.53234	2.40131e-13	1.0185e-11	down	yes
ENSMUSG00000032258	Lca5	139374;139372;139380;139381;139377;139379;139375;139378;139373	ENSMUST00000034791;ENSMUST00000190514;ENSMUST00000188548;ENSMUST00000188907;ENSMUST00000190373;ENSMUST00000190557;ENSMUST00000191225;ENSMUST00000186802;ENSMUST00000034793	GO:0005929(cilium);GO:0032391(photoreceptor connecting cilium);GO:0036064(ciliary basal body);GO:0044877(protein-containing complex binding);GO:0044877(protein-containing complex binding)	NA	NA	NA	Leber congenital amaurosis 5 (human) [Source:MGI Symbol;Acc:MGI:1923032]	protein_coding;nonsense_mediated_decay;processed_transcript;retained_intron	NA	0.890684	2.57159	0.346355	-1.52968	2.53726e-12	8.96403e-11	down	yes
ENSMUSG00000094117	Igkv3-12	110754	ENSMUST00000103396	GO:0002377(immunoglobulin production);GO:0005615(extracellular space);GO:0006955(immune response)	NA	NA	NA	immunoglobulin kappa variable 3-12 [Source:MGI Symbol;Acc:MGI:1330815]	IG_V_gene	NA	270.576	780.114	0.346842	-1.52765	4.92678e-14	2.36113e-12	down	yes
ENSMUSG00000022037	Clu	46875;46877;46882;46876;46878;46883	ENSMUST00000022616;ENSMUST00000146990;ENSMUST00000144619;ENSMUST00000138665;ENSMUST00000153460;ENSMUST00000152903	GO:0000902(cell morphogenesis);GO:0001540(amyloid-beta binding);GO:0001774(microglial cell activation);GO:0002434(immune complex clearance);GO:0005102(signaling receptor binding);GO:0005515(protein binding);GO:0005576(extracellular region);GO:0005615(extracellular space);GO:0005634(nucleus);GO:0005737(cytoplasm);GO:0005739(mitochondrion);GO:0005743(mitochondrial inner membrane);GO:0005783(endopla…	04610(Complement and coagulation cascades);04610(Complement and coagulation cascades)	K17252	NA	clusterin [Source:MGI Symbol;Acc:MGI:88423]	protein_coding;retained_intron;nonsense_mediated_decay	R_MMU_977606(Regulation_of_Complement_cascade);R_MMU_166665(Terminal_pathway_of_complement);R_MMU_6803157(Antimicrobial_peptides);R_MMU_109582(Hemostasis);R_MMU_166658(Complement_cascade);R_MMU_76002(Platelet_activation,_signaling_and_aggregation);R_MMU_168256(Immune_System);R_MMU_114608(Platelet_degranulation);R_MMU_168249(Innate_Immune_System);R_MMU_76005(Response_to_elevated_platelet_cytosolic…	21.1133	60.8017	0.347248	-1.52596	5.65502e-14	2.66981e-12	down	yes
ENSMUSG00000026831	1700007K13Rik	74700;74699	ENSMUST00000086370;ENSMUST00000126242	GO:0003674(molecular_function);GO:0005634(nucleus);GO:0006974(cellular response to DNA damage stimulus);GO:0007368(determination of left/right symmetry);GO:0010468(regulation of gene expression);GO:0071494(cellular response to UV-C);GO:0071494(cellular response to UV-C)	NA	NA	NA	RIKEN cDNA 1700007K13 gene [Source:MGI Symbol;Acc:MGI:1916577]	protein_coding;processed_transcript	NA	14.7651	42.3714	0.34847	-1.5209	2.29472e-13	9.81162e-12	down	yes
ENSMUSG00000117964	Gm36043	71267;71266	ENSMUST00000236682;ENSMUST00000237571	NA	NA	NA	NA	predicted gene, 36043 [Source:MGI Symbol;Acc:MGI:5595202]	antisense	NA	0.830211	2.38162	0.348592	-1.52039	1.1106e-11	3.4544e-10	down	yes
ENSMUSG00000020826	Nos2	27295;27293	ENSMUST00000214397;ENSMUST00000018610	GO:0001666(response to hypoxia);GO:0003779(actin binding);GO:0003958(NADPH-hemoprotein reductase activity);GO:0004517(nitric-oxide synthase activity);GO:0005515(protein binding);GO:0005516(calmodulin binding);GO:0005615(extracellular space);GO:0005634(nucleus);GO:0005737(cytoplasm);GO:0005777(peroxisome);GO:0005829(cytosol);GO:0005886(plasma membrane);GO:0006527(arginine catabolic process);GO:000…	00220(Arginine biosynthesis);00330(Arginine and proline metabolism);04020(Calcium signaling pathway);04066(HIF-1 signaling pathway);04146(Peroxisome);04371(Apelin signaling pathway);04926(Relaxin signaling pathway);05132(Salmonella infection);05133(Pertussis);05140(Leishmaniasis);05142(Chagas disease (American trypanosomiasis));05145(Toxoplasmosis);05146(Amoebiasis);05152(Tuberculosis);05200(Path…	K13241	EC:1.14.13.39	nitric oxide synthase 2, inducible [Source:MGI Symbol;Acc:MGI:97361]	protein_coding	R_MMU_9033241(Peroxisomal_protein_import);R_MMU_418346(Platelet_homeostasis);R_MMU_9609507(Protein_localization);R_MMU_109582(Hemostasis);R_MMU_1222556(ROS_and_RNS_production_in_phagocytes);R_MMU_168256(Immune_System);R_MMU_392154(Nitric_oxide_stimulates_guanylate_cyclase);R_MMU_168249(Innate_Immune_System)	0.511829	1.46572	0.349199	-1.51788	1.88517e-10	4.79238e-09	down	yes
ENSMUSG00000026630	Batf3	15760;15759;15763;15761;15762	ENSMUST00000193771;ENSMUST00000194833;ENSMUST00000191621;ENSMUST00000027943;ENSMUST00000192268	GO:0000122(negative regulation of transcription by RNA polymerase II);GO:0000978(RNA polymerase II cis-regulatory region sequence-specific DNA binding);GO:0000981(DNA-binding transcription factor activity, RNA polymerase II-specific);GO:0001227(DNA-binding transcription repressor activity, RNA polymerase II-specific);GO:0003677(DNA binding);GO:0003700(DNA-binding transcription factor activity);GO…	NA	K09034	NA	basic leucine zipper transcription factor, ATF-like 3 [Source:MGI Symbol;Acc:MGI:1925491]	processed_transcript;retained_intron;protein_coding	NA	0.612726	1.75179	0.349771	-1.51552	3.75971e-08	6.17394e-07	down	yes
ENSMUSG00000050592	Fam78a	75250;75244	ENSMUST00000056406;ENSMUST00000139629	GO:0003674(molecular_function);GO:0005575(cellular_component);GO:0008150(biological_process);GO:0008150(biological_process)	NA	NA	NA	family with sequence similarity 78, member A [Source:MGI Symbol;Acc:MGI:2443569]	protein_coding;nonsense_mediated_decay	NA	0.399393	1.14061	0.350158	-1.51392	1.42228e-10	3.74157e-09	down	yes
ENSMUSG00000034227	Foxj1	30563	ENSMUST00000036215	GO:0000122(negative regulation of transcription by RNA polymerase II);GO:0000976(transcription regulatory region sequence-specific DNA binding);GO:0000978(RNA polymerase II cis-regulatory region sequence-specific DNA binding);GO:0001228(DNA-binding transcription activator activity, RNA polymerase II-specific);GO:0002508(central tolerance induction);GO:0002635(negative regulation of germinal cente…	NA	K09402	NA	forkhead box J1 [Source:MGI Symbol;Acc:MGI:1347474]	protein_coding	NA	15.3241	43.6645	0.350951	-1.51066	1.22229e-13	5.40087e-12	down	yes
ENSMUSG00000076666	Ighv14-4	36411	ENSMUST00000195706	GO:0003823(antigen binding);GO:0006910(phagocytosis, recognition);GO:0006911(phagocytosis, engulfment);GO:0006958(complement activation, classical pathway);GO:0009897(external side of plasma membrane);GO:0034987(immunoglobulin receptor binding);GO:0042571(immunoglobulin complex, circulating);GO:0042742(defense response to bacterium);GO:0045087(innate immune response);GO:0050853(B cell receptor si…	NA	NA	NA	immunoglobulin heavy variable 14-4 [Source:MGI Symbol;Acc:MGI:4439765]	IG_V_gene	R_MMU_2871809(FCERI_mediated_Ca+2_mobilization);R_MMU_977606(Regulation_of_Complement_cascade);R_MMU_5653656(Vesicle_mediated_transport);R_MMU_2029481(FCGR_activation);R_MMU_2029480(Fcgamma_receptor_(FCGR)_dependent_phagocytosis);R_MMU_983705(Signaling_by_the_B_Cell_Receptor_(BCR));R_MMU_109582(Hemostasis);R_MMU_173623(Classical_antibody_mediated_complement_activation);R_MMU_166663(Initial_trigge…	19.8753	56.631	0.350962	-1.51061	1.93644e-12	6.93403e-11	down	yes
ENSMUSG00000038011	Dnah10	105366;105362;105365;105361	ENSMUST00000196708;ENSMUST00000058440;ENSMUST00000197824;ENSMUST00000141137	GO:0000166(nucleotide binding);GO:0003341(cilium movement);GO:0003774(motor activity);GO:0003777(microtubule motor activity);GO:0005524(ATP binding);GO:0005737(cytoplasm);GO:0005856(cytoskeleton);GO:0005874(microtubule);GO:0005929(cilium);GO:0005930(axoneme);GO:0007018(microtubule-based movement);GO:0008569(ATP-dependent microtubule motor activity, minus-end-directed);GO:0030286(dynein complex);G…	05016(Huntington disease);05016(Huntington disease)	K10408	NA	dynein, axonemal, heavy chain 10 [Source:MGI Symbol;Acc:MGI:1860299]	retained_intron;protein_coding	NA	0.88344	2.51676	0.351023	-1.51036	3.55794e-13	1.47362e-11	down	yes
ENSMUSG00000043913	Ccdc60	104416	ENSMUST00000050178	GO:0003674(molecular_function);GO:0005575(cellular_component);GO:0008150(biological_process)	NA	NA	NA	coiled-coil domain containing 60 [Source:MGI Symbol;Acc:MGI:2141043]	protein_coding	NA	0.562755	1.60297	0.35107	-1.51017	1.19901e-10	3.2074e-09	down	yes
ENSMUSG00000085558	4930412C18Rik	91110;91112;91111;91109	ENSMUST00000138390;ENSMUST00000144703;ENSMUST00000146481;ENSMUST00000124122	NA	NA	NA	NA	RIKEN cDNA 4930412C18 gene [Source:MGI Symbol;Acc:MGI:2443490]	processed_transcript	NA	0.16574	0.472015	0.351133	-1.50991	5.04408e-08	8.07409e-07	down	yes
ENSMUSG00000023019	Gpd1	52786;52788	ENSMUST00000023760;ENSMUST00000161768	GO:0004367(glycerol-3-phosphate dehydrogenase [NAD+] activity);GO:0004368(glycerol-3-phosphate dehydrogenase (quinone) activity);GO:0005737(cytoplasm);GO:0005739(mitochondrion);GO:0005829(cytosol);GO:0005975(carbohydrate metabolic process);GO:0006072(glycerol-3-phosphate metabolic process);GO:0006094(gluconeogenesis);GO:0006116(NADH oxidation);GO:0006127(glycerophosphate shuttle);GO:0006734(NADH …	00564(Glycerophospholipid metabolism);00564(Glycerophospholipid metabolism)	K00006	EC:1.1.1.8	glycerol-3-phosphate dehydrogenase 1 (soluble) [Source:MGI Symbol;Acc:MGI:95679]	protein_coding;retained_intron	R_MMU_556833(Metabolism_of_lipids);R_MMU_1430728(Metabolism);R_MMU_1483257(Phospholipid_metabolism);R_MMU_1483166(Synthesis_of_PA);R_MMU_1483206(Glycerophospholipid_biosynthesis)	5.73747	16.3255	0.351441	-1.50864	2.72139e-13	1.14205e-11	down	yes
ENSMUSG00000009070	Rsph14	18794;18796;18795;18798;18802;18803;18797	ENSMUST00000179546;ENSMUST00000166088;ENSMUST00000009214;ENSMUST00000160072;ENSMUST00000159994;ENSMUST00000159761;ENSMUST00000160450	GO:0003674(molecular_function);GO:0005515(protein binding);GO:0005575(cellular_component);GO:0008150(biological_process);GO:0008150(biological_process)	NA	NA	NA	radial spoke head homolog 14 (Chlamydomonas) [Source:MGI Symbol;Acc:MGI:1918486]	protein_coding;retained_intron	NA	0.735772	2.08839	0.352315	-1.50506	3.53177e-10	8.61916e-09	down	yes
ENSMUSG00000042797	Aqp11	123272;123274;123275;123273	ENSMUST00000206389;ENSMUST00000205784;ENSMUST00000205737;ENSMUST00000084986	GO:0001822(kidney development);GO:0005737(cytoplasm);GO:0005783(endoplasmic reticulum);GO:0005789(endoplasmic reticulum membrane);GO:0005829(cytosol);GO:0005886(plasma membrane);GO:0006612(protein targeting to membrane);GO:0006833(water transport);GO:0008284(positive regulation of cell population proliferation);GO:0009986(cell surface);GO:0009992(cellular water homeostasis);GO:0015250(water chann…	NA	K09870	NA	aquaporin 11 [Source:MGI Symbol;Acc:MGI:1913583]	protein_coding;retained_intron	R_MMU_382551(Transport_of_small_molecules);R_MMU_432047(Passive_transport_by_Aquaporins);R_MMU_445717(Aquaporin_mediated_transport)	0.331917	0.941571	0.352514	-1.50425	5.47273e-11	1.55302e-09	down	yes
ENSMUSG00000006784	Ttc25	29007;29008;29009;29010;29011	ENSMUST00000092684;ENSMUST00000132143;ENSMUST00000006976;ENSMUST00000150331;ENSMUST00000127389	GO:0003341(cilium movement);GO:0003674(molecular_function);GO:0005515(protein binding);GO:0005576(extracellular region);GO:0005737(cytoplasm);GO:0005856(cytoskeleton);GO:0005929(cilium);GO:0005930(axoneme);GO:0007420(brain development);GO:0007507(heart development);GO:0030324(lung development);GO:0036158(outer dynein arm assembly);GO:0042995(cell projection);GO:0060287(epithelial cilium movement …	NA	NA	NA	tetratricopeptide repeat domain 25 [Source:MGI Symbol;Acc:MGI:1921657]	protein_coding;retained_intron	NA	1.55089	4.39887	0.352566	-1.50403	1.14244e-12	4.30463e-11	down	yes
ENSMUSG00000012123	Crybg2	96564;96570;96569;96575;96565;96572;96573;96563	ENSMUST00000227683;ENSMUST00000140125;ENSMUST00000153392;ENSMUST00000146102;ENSMUST00000137053;ENSMUST00000149080;ENSMUST00000137529;ENSMUST00000219402	GO:0003674(molecular_function);GO:0005575(cellular_component);GO:0008150(biological_process);GO:0030246(carbohydrate binding);GO:0030246(carbohydrate binding)	NA	NA	NA	crystallin beta-gamma domain containing 2 [Source:MGI Symbol;Acc:MGI:1334463]	protein_coding;retained_intron;nonsense_mediated_decay	NA	0.389629	1.09953	0.354358	-1.49672	7.79753e-11	2.17004e-09	down	yes
ENSMUSG00000040936	Ulk4	142207;142206;142209;142210	ENSMUST00000171923;ENSMUST00000169176;ENSMUST00000051565;ENSMUST00000051479	GO:0000166(nucleotide binding);GO:0000226(microtubule cytoskeleton organization);GO:0003351(epithelial cilium movement involved in extracellular fluid movement);GO:0004672(protein kinase activity);GO:0004674(protein serine/threonine kinase activity);GO:0005524(ATP binding);GO:0005575(cellular_component);GO:0005576(extracellular region);GO:0006468(protein phosphorylation);GO:0007420(brain developm…	NA	K17545	EC:2.7.11.1	unc-51-like kinase 4 [Source:MGI Symbol;Acc:MGI:1921622]	protein_coding;retained_intron;nonsense_mediated_decay	NA	0.74245	2.09352	0.354641	-1.49557	4.06417e-12	1.37463e-10	down	yes
ENSMUSG00000033533	Acsm1	125355;125350	ENSMUST00000047929;ENSMUST00000126367	GO:0000166(nucleotide binding);GO:0003824(catalytic activity);GO:0003996(acyl-CoA ligase activity);GO:0004321(fatty-acyl-CoA synthase activity);GO:0005524(ATP binding);GO:0005525(GTP binding);GO:0005739(mitochondrion);GO:0005759(mitochondrial matrix);GO:0006629(lipid metabolic process);GO:0006631(fatty acid metabolic process);GO:0006633(fatty acid biosynthetic process);GO:0006637(acyl-CoA metabol…	00650(Butanoate metabolism);00650(Butanoate metabolism)	K01896	EC:6.2.1.2	acyl-CoA synthetase medium-chain family member 1 [Source:MGI Symbol;Acc:MGI:2152200]	protein_coding	R_MMU_177135(Conjugation_of_benzoate_with_glycine);R_MMU_1430728(Metabolism);R_MMU_156580(Phase_II_Conjugation_of_compounds);R_MMU_159424(Conjugation_of_carboxylic_acids);R_MMU_211859(Biological_oxidations);R_MMU_177162(Conjugation_of_phenylacetate_with_glutamine);R_MMU_156587(Amino_Acid_conjugation)	0.929265	2.619	0.354817	-1.49485	6.9884e-10	1.61599e-08	down	yes
ENSMUSG00000037716	Ccdc33	137888;137887;137889;137890;137895;137892;137898	ENSMUST00000215944;ENSMUST00000098682;ENSMUST00000119665;ENSMUST00000144887;ENSMUST00000151404;ENSMUST00000143797;ENSMUST00000123746	GO:0003674(molecular_function);GO:0005777(peroxisome);GO:0007283(spermatogenesis);GO:0007283(spermatogenesis)	NA	NA	NA	coiled-coil domain containing 33 [Source:MGI Symbol;Acc:MGI:1922464]	protein_coding;retained_intron;processed_transcript	NA	2.1092	5.9429	0.354911	-1.49447	1.16584e-12	4.37203e-11	down	yes
ENSMUSG00000051969	Tlr11	45161;45162	ENSMUST00000185091;ENSMUST00000063570	GO:0002224(toll-like receptor signaling pathway);GO:0002376(immune system process);GO:0004888(transmembrane signaling receptor activity);GO:0005515(protein binding);GO:0005887(integral component of plasma membrane);GO:0006954(inflammatory response);GO:0006955(immune response);GO:0007165(signal transduction);GO:0009617(response to bacterium);GO:0016020(membrane);GO:0016021(integral component of me…	05145(Toxoplasmosis);05145(Toxoplasmosis)	K14142	NA	toll-like receptor 11 [Source:MGI Symbol;Acc:MGI:3045226]	protein_coding	NA	0.276126	0.777762	0.355026	-1.494	2.31369e-07	3.25662e-06	down	yes
ENSMUSG00000089762	Ier5l	75065	ENSMUST00000065134	GO:0003674(molecular_function);GO:0005575(cellular_component);GO:0008150(biological_process)	NA	NA	NA	immediate early response 5-like [Source:MGI Symbol;Acc:MGI:1919750]	protein_coding	NA	0.555166	1.56368	0.355037	-1.49396	6.15881e-09	1.20763e-07	down	yes
ENSMUSG00000034792	Gna15	20033;20032	ENSMUST00000043709;ENSMUST00000147908	GO:0000166(nucleotide binding);GO:0001508(action potential);GO:0001664(G protein-coupled receptor binding);GO:0003924(GTPase activity);GO:0005525(GTP binding);GO:0005834(heterotrimeric G-protein complex);GO:0007165(signal transduction);GO:0007186(G protein-coupled receptor signaling pathway);GO:0007188(adenylate cyclase-modulating G protein-coupled receptor signaling pathway);GO:0007200(phospholi…	04020(Calcium signaling pathway);04926(Relaxin signaling pathway);05142(Chagas disease (American trypanosomiasis));05146(Amoebiasis);05146(Amoebiasis)	K04637	NA	guanine nucleotide binding protein, alpha 15 [Source:MGI Symbol;Acc:MGI:95770]	protein_coding;retained_intron	R_MMU_163685(Integration_of_energy_metabolism);R_MMU_112040(G_protein_mediated_events);R_MMU_456926(Thrombin_signalling_through_proteinase_activated_receptors_(PARs));R_MMU_109582(Hemostasis);R_MMU_1430728(Metabolism);R_MMU_392518(Signal_amplification);R_MMU_76002(Platelet_activation,_signaling_and_aggregation);R_MMU_391251(Protein_folding);R_MMU_392499(Metabolism_of_proteins);R_MMU_390466(Chaper…	0.70254	1.97711	0.355338	-1.49274	7.25996e-09	1.40274e-07	down	yes
ENSMUSG00000074591	Ankub1	85571;85573;85570;85572	ENSMUST00000200665;ENSMUST00000099091;ENSMUST00000238789;ENSMUST00000197088	GO:0003674(molecular_function);GO:0005515(protein binding);GO:0005575(cellular_component);GO:0008150(biological_process);GO:0008150(biological_process)	NA	NA	NA	ankrin repeat and ubiquitin domain containing 1 [Source:MGI Symbol;Acc:MGI:2685256]	nonsense_mediated_decay;protein_coding	NA	0.282148	0.792596	0.35598	-1.49013	2.92104e-08	4.88781e-07	down	yes
ENSMUSG00000076583	Igkv8-24	110725	ENSMUST00000103384	GO:0002377(immunoglobulin production);GO:0005615(extracellular space);GO:0006955(immune response)	NA	NA	NA	immunoglobulin kappa chain variable 8-24 [Source:MGI Symbol;Acc:MGI:4947958]	IG_V_gene	NA	320.527	900.098	0.356102	-1.48964	1.76548e-13	7.61027e-12	down	yes
ENSMUSG00000042474	Fcmr	12457;12459;12460;12458	ENSMUST00000038829;ENSMUST00000126821;ENSMUST00000145446;ENSMUST00000149355	GO:0016020(membrane);GO:0016021(integral component of membrane);GO:0016021(integral component of membrane)	NA	NA	NA	Fc fragment of IgM receptor [Source:MGI Symbol;Acc:MGI:1916419]	protein_coding;processed_transcript	NA	3.10795	8.7251	0.356208	-1.48921	9.17512e-12	2.87638e-10	down	yes
ENSMUSG00000032053	Pou2af1	137426;137428	ENSMUST00000034554;ENSMUST00000214322	GO:0000978(RNA polymerase II cis-regulatory region sequence-specific DNA binding);GO:0000979(RNA polymerase II core promoter sequence-specific DNA binding);GO:0002314(germinal center B cell differentiation);GO:0003677(DNA binding);GO:0003713(transcription coactivator activity);GO:0005515(protein binding);GO:0005634(nucleus);GO:0032755(positive regulation of interleukin-6 production);GO:0045944(po…	NA	NA	NA	POU domain, class 2, associating factor 1 [Source:MGI Symbol;Acc:MGI:105086]	protein_coding	NA	15.9757	44.8202	0.356441	-1.48827	2.63999e-13	1.11378e-11	down	yes
ENSMUSG00000028654	Mycl	95505;95506;95507	ENSMUST00000106252;ENSMUST00000030407;ENSMUST00000135925	GO:0000978(RNA polymerase II cis-regulatory region sequence-specific DNA binding);GO:0001228(DNA-binding transcription activator activity, RNA polymerase II-specific);GO:0003677(DNA binding);GO:0003700(DNA-binding transcription factor activity);GO:0005515(protein binding);GO:0005634(nucleus);GO:0005654(nucleoplasm);GO:0006355(regulation of transcription, DNA-templated);GO:0042025(host cell nucleu…	NA	K09110	NA	v-myc avian myelocytomatosis viral oncogene lung carcinoma derived [Source:MGI Symbol;Acc:MGI:96799]	protein_coding;processed_transcript	NA	1.36283	3.82032	0.356733	-1.48709	8.46531e-12	2.68034e-10	down	yes
ENSMUSG00000009378	Slc16a12	71475	ENSMUST00000009522	GO:0005308(creatine transmembrane transporter activity);GO:0005886(plasma membrane);GO:0005887(integral component of plasma membrane);GO:0008028(monocarboxylic acid transmembrane transporter activity);GO:0015293(symporter activity);GO:0015718(monocarboxylic acid transport);GO:0015881(creatine transmembrane transport);GO:0016020(membrane);GO:0016021(integral component of membrane);GO:0016323(basol…	NA	K11810	NA	solute carrier family 16 (monocarboxylic acid transporters), member 12 [Source:MGI Symbol;Acc:MGI:2147716]	protein_coding	NA	2.02333	5.65988	0.357487	-1.48404	2.75219e-12	9.59516e-11	down	yes
ENSMUSG00000076540	Igkv4-80	110629	ENSMUST00000103341	GO:0002377(immunoglobulin production);GO:0005615(extracellular space);GO:0006955(immune response)	NA	NA	NA	immunoglobulin kappa variable 4-80 [Source:MGI Symbol;Acc:MGI:4439653]	IG_V_gene	NA	39.3043	109.897	0.357646	-1.4834	1.00739e-12	3.86931e-11	down	yes
ENSMUSG00000095497	Igkv1-122	110552	ENSMUST00000103314	GO:0002377(immunoglobulin production);GO:0005615(extracellular space);GO:0006955(immune response)	NA	NA	NA	immunoglobulin kappa chain variable 1-122 [Source:MGI Symbol;Acc:MGI:4439722]	IG_V_gene	NA	6.27039	17.5205	0.357888	-1.48242	3.52581e-10	8.61916e-09	down	yes
ENSMUSG00000103847	Gm20056	55489	ENSMUST00000194813	NA	NA	NA	NA	predicted gene, 20056 [Source:MGI Symbol;Acc:MGI:5012241]	processed_pseudogene	NA	10.3877	28.9981	0.358219	-1.48109	1.15484e-11	3.58497e-10	down	yes
ENSMUSG00000059970	Hspa2	33868	ENSMUST00000219555	GO:0000166(nucleotide binding);GO:0000795(synaptonemal complex);GO:0001673(male germ cell nucleus);GO:0001934(positive regulation of protein phosphorylation);GO:0005515(protein binding);GO:0005524(ATP binding);GO:0005634(nucleus);GO:0005654(nucleoplasm);GO:0005737(cytoplasm);GO:0005739(mitochondrion);GO:0005819(spindle);GO:0005829(cytosol);GO:0005856(cytoskeleton);GO:0005886(plasma membrane);GO:0…	03040(Spliceosome);04010(MAPK signaling pathway);04141(Protein processing in endoplasmic reticulum);04144(Endocytosis);04213(Longevity regulating pathway - multiple species);04612(Antigen processing and presentation);04915(Estrogen signaling pathway);05134(Legionellosis);05145(Toxoplasmosis);05162(Measles);05164(Influenza A)	K03283	NA	heat shock protein 2 [Source:MGI Symbol;Acc:MGI:96243]	protein_coding	R_MMU_3371453(Regulation_of_HSF1_mediated_heat_shock_response);R_MMU_2262752(Cellular_responses_to_stress);R_MMU_3371571(HSF1_dependent_transactivation);R_MMU_3371568(Attenuation_phase);R_MMU_8953897(Cellular_responses_to_external_stimuli);R_MMU_3371556(Cellular_response_to_heat_stress);R_MMU_3371497(HSP90_chaperone_cycle_for_steroid_hormone_receptors_(SHR))	4.28344	11.9543	0.358316	-1.48069	1.64587e-12	6.04903e-11	down	yes
ENSMUSG00000054662	Ano9	127325;127328;127324;127326;127323;127327	ENSMUST00000211515;ENSMUST00000210763;ENSMUST00000210496;ENSMUST00000210927;ENSMUST00000067836;ENSMUST00000210085	GO:0005229(intracellular calcium activated chloride channel activity);GO:0005254(chloride channel activity);GO:0005886(plasma membrane);GO:0006821(chloride transport);GO:0006869(lipid transport);GO:0016020(membrane);GO:0016021(integral component of membrane);GO:0017128(phospholipid scramblase activity);GO:0055085(transmembrane transport);GO:0061588(calcium activated phospholipid scrambling);GO:00…	NA	K19503	NA	anoctamin 9 [Source:MGI Symbol;Acc:MGI:1918595]	retained_intron;protein_coding	R_MMU_382551(Transport_of_small_molecules);R_MMU_2672351(Stimuli_sensing_channels);R_MMU_983712(Ion_channel_transport)	0.368042	1.02356	0.359571	-1.47565	8.5492e-09	1.61448e-07	down	yes
ENSMUSG00000056215	Lrguk	108705;108704;108706;108707	ENSMUST00000070189;ENSMUST00000228187;ENSMUST00000101564;ENSMUST00000141078	GO:0000166(nucleotide binding);GO:0001669(acrosomal vesicle);GO:0002177(manchette);GO:0004385(guanylate kinase activity);GO:0005515(protein binding);GO:0005524(ATP binding);GO:0005737(cytoplasm);GO:0005829(cytosol);GO:0005856(cytoskeleton);GO:0007283(spermatogenesis);GO:0016301(kinase activity);GO:0016310(phosphorylation);GO:0016740(transferase activity);GO:0030154(cell differentiation);GO:003141…	NA	NA	NA	leucine-rich repeats and guanylate kinase domain containing [Source:MGI Symbol;Acc:MGI:1921604]	protein_coding	NA	0.530092	1.46856	0.360961	-1.47008	8.97716e-12	2.83111e-10	down	yes
ENSMUSG00000050625	Ccdc121	15350	ENSMUST00000058825	GO:0003674(molecular_function);GO:0005575(cellular_component);GO:0008150(biological_process)	NA	NA	NA	coiled-coil domain containing 121 [Source:MGI Symbol;Acc:MGI:2685601]	protein_coding	NA	2.26318	6.26172	0.361432	-1.46821	4.82992e-11	1.38535e-09	down	yes
ENSMUSG00000079625	Tm4sf19	55488	ENSMUST00000115149	GO:0003674(molecular_function);GO:0008150(biological_process);GO:0016020(membrane);GO:0016021(integral component of membrane)	NA	NA	NA	transmembrane 4 L six family member 19 [Source:MGI Symbol;Acc:MGI:3645933]	protein_coding	NA	3.17421	8.76933	0.361967	-1.46607	5.304e-11	1.50784e-09	down	yes
ENSMUSG00000029193	Cckar	101237;101236;101238	ENSMUST00000031093;ENSMUST00000200691;ENSMUST00000202946	GO:0001659(temperature homeostasis);GO:0001696(gastric acid secretion);GO:0001764(neuron migration);GO:0002023(reduction of food intake in response to dietary excess);GO:0004930(G protein-coupled receptor activity);GO:0004951(cholecystokinin receptor activity);GO:0005737(cytoplasm);GO:0005764(lysosome);GO:0005768(endosome);GO:0005783(endoplasmic reticulum);GO:0005886(plasma membrane);GO:0005887(i…	04020(Calcium signaling pathway);04080(Neuroactive ligand-receptor interaction);04911(Insulin secretion);04972(Pancreatic secretion);04972(Pancreatic secretion)	K04194	NA	cholecystokinin A receptor [Source:MGI Symbol;Acc:MGI:99478]	protein_coding;processed_transcript	R_MMU_373076(Class_A/1_(Rhodopsin_like_receptors));R_MMU_375276(Peptide_ligand_binding_receptors);R_MMU_500792(GPCR_ligand_binding);R_MMU_416476(G_alpha_(q)_signalling_events);R_MMU_372790(Signaling_by_GPCR);R_MMU_388396(GPCR_downstream_signalling);R_MMU_162582(Signal_Transduction)	7.61788	21.0312	0.362218	-1.46507	7.48472e-13	2.96825e-11	down	yes
ENSMUSG00000067370	B3galt4	61466	ENSMUST00000087543	GO:0000139(Golgi membrane);GO:0001574(ganglioside biosynthetic process);GO:0005794(Golgi apparatus);GO:0006486(protein glycosylation);GO:0008375(acetylglucosaminyltransferase activity);GO:0008376(acetylgalactosaminyltransferase activity);GO:0008499(UDP-galactose:beta-N-acetylglucosamine beta-1,3-galactosyltransferase activity);GO:0016020(membrane);GO:0016021(integral component of membrane);GO:001…	00604(Glycosphingolipid biosynthesis - ganglio series)	K00715	EC:2.4.1.62	UDP-Gal:betaGlcNAc beta 1,3-galactosyltransferase, polypeptide 4 [Source:MGI Symbol;Acc:MGI:1859517]	protein_coding	R_MMU_9037629(Lewis_blood_group_biosynthesis);R_MMU_71387(Metabolism_of_carbohydrates);R_MMU_1430728(Metabolism);R_MMU_9033658(Blood_group_systems_biosynthesis)	1.45408	4.0107	0.362549	-1.46375	6.89964e-10	1.5978e-08	down	yes
ENSMUSG00000003051	Elf3	12887;12886;12888	ENSMUST00000185752;ENSMUST00000003135;ENSMUST00000188895	GO:0000978(RNA polymerase II cis-regulatory region sequence-specific DNA binding);GO:0000981(DNA-binding transcription factor activity, RNA polymerase II-specific);GO:0001228(DNA-binding transcription activator activity, RNA polymerase II-specific);GO:0001824(blastocyst development);GO:0003677(DNA binding);GO:0003700(DNA-binding transcription factor activity);GO:0005634(nucleus);GO:0005654(nucleo…	NA	K09429	NA	E74-like factor 3 [Source:MGI Symbol;Acc:MGI:1101781]	protein_coding;retained_intron	R_MMU_157118(Signaling_by_NOTCH);R_MMU_162582(Signal_Transduction);R_MMU_1912408(Pre_NOTCH_Transcription_and_Translation);R_MMU_1912422(Pre_NOTCH_Expression_and_Processing)	7.78491	21.4698	0.362598	-1.46356	1.1872e-12	4.43118e-11	down	yes
ENSMUSG00000040046	Tph1	120791;120797;120795;120792;120796	ENSMUST00000049298;ENSMUST00000163468;ENSMUST00000110264;ENSMUST00000107669;ENSMUST00000170045	GO:0004497(monooxygenase activity);GO:0004510(tryptophan 5-monooxygenase activity);GO:0005506(iron ion binding);GO:0005737(cytoplasm);GO:0007623(circadian rhythm);GO:0009072(aromatic amino acid family metabolic process);GO:0016491(oxidoreductase activity);GO:0016714(oxidoreductase activity, acting on paired donors, with incorporation or reduction of molecular oxygen, reduced pteridine as one dono…	00380(Tryptophan metabolism);00790(Folate biosynthesis);04726(Serotonergic synapse);04726(Serotonergic synapse)	K00502	EC:1.14.16.4	tryptophan hydroxylase 1 [Source:MGI Symbol;Acc:MGI:98796]	protein_coding;retained_intron	R_MMU_1430728(Metabolism);R_MMU_209776(Metabolism_of_amine_derived_hormones);R_MMU_71291(Metabolism_of_amino_acids_and_derivatives);R_MMU_209931(Serotonin_and_melatonin_biosynthesis)	0.189492	0.522537	0.362639	-1.4634	7.59595e-08	1.17673e-06	down	yes
ENSMUSG00000031478	Nek3	128976;128975;128978	ENSMUST00000110730;ENSMUST00000033865;ENSMUST00000151371	GO:0000166(nucleotide binding);GO:0004672(protein kinase activity);GO:0004674(protein serine/threonine kinase activity);GO:0005524(ATP binding);GO:0005737(cytoplasm);GO:0006468(protein phosphorylation);GO:0007049(cell cycle);GO:0016301(kinase activity);GO:0016310(phosphorylation);GO:0016740(transferase activity);GO:0030010(establishment of cell polarity);GO:0030424(axon);GO:0042995(cell projectio…	NA	NA	NA	NIMA (never in mitosis gene a)-related expressed kinase 3 [Source:MGI Symbol;Acc:MGI:1344371]	protein_coding;retained_intron	NA	0.71722	1.97637	0.362898	-1.46237	7.888e-09	1.50938e-07	down	yes
ENSMUSG00000041237	Pklr	86855;86857	ENSMUST00000107482;ENSMUST00000148097	GO:0000166(nucleotide binding);GO:0000287(magnesium ion binding);GO:0001666(response to hypoxia);GO:0003824(catalytic activity);GO:0004743(pyruvate kinase activity);GO:0005524(ATP binding);GO:0005829(cytosol);GO:0005975(carbohydrate metabolic process);GO:0006096(glycolytic process);GO:0006754(ATP biosynthetic process);GO:0007584(response to nutrient);GO:0008152(metabolic process);GO:0009408(respo…	00010(Glycolysis / Gluconeogenesis);00230(Purine metabolism);00620(Pyruvate metabolism);04910(Insulin signaling pathway);04930(Type II diabetes mellitus);04932(Non-alcoholic fatty liver disease (NAFLD));04950(Maturity onset diabetes of the young);04950(Maturity onset diabetes of the young)	K12406	EC:2.7.1.40	pyruvate kinase liver and red blood cell [Source:MGI Symbol;Acc:MGI:97604]	protein_coding;processed_transcript	NA	0.525877	1.44876	0.362985	-1.46202	4.71187e-09	9.52088e-08	down	yes
ENSMUSG00000072663	Spef2	48520;48519;48521;48522;48524	ENSMUST00000208854;ENSMUST00000160236;ENSMUST00000041840;ENSMUST00000159093;ENSMUST00000159368	GO:0002177(manchette);GO:0003351(epithelial cilium movement involved in extracellular fluid movement);GO:0005515(protein binding);GO:0005576(extracellular region);GO:0005737(cytoplasm);GO:0005794(Golgi apparatus);GO:0005856(cytoskeleton);GO:0007283(spermatogenesis);GO:0007288(sperm axoneme assembly);GO:0030154(cell differentiation);GO:0036126(sperm flagellum);GO:0048705(skeletal system morphogene…	NA	NA	NA	sperm flagellar 2 [Source:MGI Symbol;Acc:MGI:2443727]	protein_coding	NA	1.37872	3.79824	0.36299	-1.462	2.19387e-12	7.80298e-11	down	yes
ENSMUSG00000041654	Slc39a11	30132;30133;30136;30135;30134	ENSMUST00000071539;ENSMUST00000106633;ENSMUST00000149034;ENSMUST00000125890;ENSMUST00000042657	GO:0005385(zinc ion transmembrane transporter activity);GO:0005634(nucleus);GO:0005737(cytoplasm);GO:0005794(Golgi apparatus);GO:0005886(plasma membrane);GO:0006811(ion transport);GO:0006829(zinc ion transport);GO:0016020(membrane);GO:0016021(integral component of membrane);GO:0030001(metal ion transport);GO:0046873(metal ion transmembrane transporter activity);GO:0055085(transmembrane transport)…	NA	K14717	NA	solute carrier family 39 (metal ion transporter), member 11 [Source:MGI Symbol;Acc:MGI:1917056]	protein_coding	NA	2.7271	7.50995	0.363131	-1.46144	4.68934e-12	1.56604e-10	down	yes
ENSMUSG00000054598	9130230L23Rik	101569;101570;101573;101571;101576;101575;101574	ENSMUST00000201562;ENSMUST00000201351;ENSMUST00000202278;ENSMUST00000165250;ENSMUST00000201302;ENSMUST00000201386;ENSMUST00000202773	GO:0003674(molecular_function);GO:0005575(cellular_component);GO:0008150(biological_process);GO:0008150(biological_process)	NA	NA	NA	RIKEN cDNA 9130230L23 gene [Source:MGI Symbol;Acc:MGI:3041166]	retained_intron;protein_coding	NA	0.482342	1.32788	0.363244	-1.46099	7.51979e-11	2.09642e-09	down	yes
ENSMUSG00000037362	Ccn3	49571	ENSMUST00000050027	GO:0001525(angiogenesis);GO:0002062(chondrocyte differentiation);GO:0005112(Notch binding);GO:0005178(integrin binding);GO:0005515(protein binding);GO:0005520(insulin-like growth factor binding);GO:0005576(extracellular region);GO:0005615(extracellular space);GO:0005737(cytoplasm);GO:0005921(gap junction);GO:0007155(cell adhesion);GO:0007165(signal transduction);GO:0008083(growth factor activity)…	NA	NA	NA	cellular communication network factor 3 [Source:MGI Symbol;Acc:MGI:109185]	protein_coding	NA	0.84747	2.32651	0.364267	-1.45693	6.40351e-10	1.49621e-08	down	yes
ENSMUSG00000076615	Ighg3	36294;36295	ENSMUST00000223179;ENSMUST00000103423	GO:0003823(antigen binding);GO:0005615(extracellular space);GO:0006910(phagocytosis, recognition);GO:0006911(phagocytosis, engulfment);GO:0006958(complement activation, classical pathway);GO:0009897(external side of plasma membrane);GO:0016020(membrane);GO:0016021(integral component of membrane);GO:0034987(immunoglobulin receptor binding);GO:0042571(immunoglobulin complex, circulating);GO:0042742…	NA	NA	NA	Immunoglobulin heavy constant gamma 3 [Source:MGI Symbol;Acc:MGI:2144790]	IG_C_gene	R_MMU_977606(Regulation_of_Complement_cascade);R_MMU_2029481(FCGR_activation);R_MMU_2029480(Fcgamma_receptor_(FCGR)_dependent_phagocytosis);R_MMU_173623(Classical_antibody_mediated_complement_activation);R_MMU_166663(Initial_triggering_of_complement);R_MMU_166658(Complement_cascade);R_MMU_2029482(Regulation_of_actin_dynamics_for_phagocytic_cup_formation);R_MMU_168256(Immune_System);R_MMU_166786(C…	1.38964	3.81426	0.364326	-1.4567	1.29423e-10	3.43317e-09	down	yes
ENSMUSG00000020676	Ccl11	27455	ENSMUST00000000342	GO:0001938(positive regulation of endothelial cell proliferation);GO:0002544(chronic inflammatory response);GO:0002548(monocyte chemotaxis);GO:0002551(mast cell chemotaxis);GO:0005125(cytokine activity);GO:0005576(extracellular region);GO:0005615(extracellular space);GO:0006935(chemotaxis);GO:0006954(inflammatory response);GO:0006955(immune response);GO:0007010(cytoskeleton organization);GO:00070…	04060(Cytokine-cytokine receptor interaction);04062(Chemokine signaling pathway);04657(IL-17 signaling pathway);05310(Asthma)	K16597	NA	chemokine (C-C motif) ligand 11 [Source:MGI Symbol;Acc:MGI:103576]	protein_coding	R_MMU_373076(Class_A/1_(Rhodopsin_like_receptors));R_MMU_380108(Chemokine_receptors_bind_chemokines);R_MMU_375276(Peptide_ligand_binding_receptors);R_MMU_500792(GPCR_ligand_binding);R_MMU_372790(Signaling_by_GPCR);R_MMU_388396(GPCR_downstream_signalling);R_MMU_162582(Signal_Transduction);R_MMU_418594(G_alpha_(i)_signalling_events)	21.5788	59.2084	0.364454	-1.45619	1.1161e-12	4.23558e-11	down	yes
ENSMUSG00000016028	Celsr1	51935;51934;51939;51937;51936	ENSMUST00000226840;ENSMUST00000016172;ENSMUST00000227450;ENSMUST00000239396;ENSMUST00000239489	GO:0001736(establishment of planar polarity);GO:0001764(neuron migration);GO:0001843(neural tube closure);GO:0001942(hair follicle development);GO:0004888(transmembrane signaling receptor activity);GO:0004930(G protein-coupled receptor activity);GO:0005509(calcium ion binding);GO:0005515(protein binding);GO:0005654(nucleoplasm);GO:0005886(plasma membrane);GO:0007155(cell adhesion);GO:0007156(homo…	NA	K04600	NA	cadherin, EGF LAG seven-pass G-type receptor 1 [Source:MGI Symbol;Acc:MGI:1100883]	protein_coding;retained_intron	NA	1.35399	3.71016	0.364942	-1.45426	1.881e-12	6.75074e-11	down	yes
ENSMUSG00000039021	Ttc16	75466;75462;75463;75467	ENSMUST00000125891;ENSMUST00000066478;ENSMUST00000161430;ENSMUST00000123674	GO:0005515(protein binding);GO:0005515(protein binding)	NA	NA	NA	tetratricopeptide repeat domain 16 [Source:MGI Symbol;Acc:MGI:2443048]	nonsense_mediated_decay;protein_coding;retained_intron	NA	1.64106	4.49323	0.36523	-1.45312	5.05126e-12	1.67282e-10	down	yes
ENSMUSG00000022408	Fam83f	51311	ENSMUST00000023044	NA	NA	NA	NA	family with sequence similarity 83, member F [Source:MGI Symbol;Acc:MGI:2146227]	protein_coding	NA	0.693738	1.89811	0.365488	-1.4521	2.17926e-09	4.67076e-08	down	yes
ENSMUSG00000031445	Proz	128591;128592;128590;128589	ENSMUST00000211453;ENSMUST00000033822;ENSMUST00000211363;ENSMUST00000210050	GO:0004252(serine-type endopeptidase activity);GO:0005509(calcium ion binding);GO:0005576(extracellular region);GO:0005615(extracellular space);GO:0006508(proteolysis);GO:0007596(blood coagulation);GO:0007599(hemostasis);GO:0007599(hemostasis)	NA	NA	NA	protein Z, vitamin K-dependent plasma glycoprotein [Source:MGI Symbol;Acc:MGI:1860488]	nonsense_mediated_decay;protein_coding;retained_intron	R_MMU_159763(Transport_of_gamma_carboxylated_protein_precursors_from_the_endoplasmic_reticulum_to_the_Golgi_apparatus);R_MMU_159782(Removal_of_aminoterminal_propeptides_from_gamma_carboxylated_proteins);R_MMU_159854(Gamma_carboxylation,_transport,_and_amino_terminal_cleavage_of_proteins);R_MMU_163841(Gamma_carboxylation,_hypusine_formation_and_arylsulfatase_activation);R_MMU_597592(Post_translati…	0.579509	1.58406	0.365838	-1.45072	2.50724e-10	6.26337e-09	down	yes
ENSMUSG00000104422	Ighv1-14	36468	ENSMUST00000194015	NA	NA	NA	NA	immunoglobulin heavy variable 1-14 [Source:MGI Symbol;Acc:MGI:4439781]	IG_V_pseudogene	NA	67.4646	184.246	0.366167	-1.44943	1.24156e-12	4.6232e-11	down	yes
ENSMUSG00000045326	Fndc7	88949;88953;88947;88948	ENSMUST00000102620;ENSMUST00000139137;ENSMUST00000180063;ENSMUST00000123018	GO:0003674(molecular_function);GO:0005515(protein binding);GO:0005575(cellular_component);GO:0005576(extracellular region);GO:0008150(biological_process);GO:0008150(biological_process)	NA	NA	NA	fibronectin type III domain containing 7 [Source:MGI Symbol;Acc:MGI:2443535]	protein_coding;retained_intron;processed_transcript	NA	0.347807	0.948991	0.366502	-1.44811	1.37081e-09	3.03703e-08	down	yes
ENSMUSG00000032786	Alas1	140594;140601;140602;140598;140599;140603;140597;140596;140593;140604	ENSMUST00000141118;ENSMUST00000123601;ENSMUST00000214249;ENSMUST00000143125;ENSMUST00000123115;ENSMUST00000219340;ENSMUST00000134053;ENSMUST00000074082;ENSMUST00000112524;ENSMUST00000219129	GO:0001666(response to hypoxia);GO:0003824(catalytic activity);GO:0003870(5-aminolevulinate synthase activity);GO:0005654(nucleoplasm);GO:0005739(mitochondrion);GO:0005759(mitochondrial matrix);GO:0005829(cytosol);GO:0006778(porphyrin-containing compound metabolic process);GO:0006782(protoporphyrinogen IX biosynthetic process);GO:0006783(heme biosynthetic process);GO:0009058(biosynthetic process)…	00260(Glycine, serine and threonine metabolism);00860(Porphyrin and chlorophyll metabolism);00860(Porphyrin and chlorophyll metabolism)	K00643	EC:2.3.1.37	aminolevulinic acid synthase 1 [Source:MGI Symbol;Acc:MGI:87989]	protein_coding;retained_intron;nonsense_mediated_decay;processed_transcript	R_MMU_189445(Metabolism_of_porphyrins);R_MMU_1430728(Metabolism);R_MMU_189451(Heme_biosynthesis)	12.9534	35.2592	0.367377	-1.44467	9.03075e-13	3.52844e-11	down	yes
ENSMUSG00000033684	Qsox1	13635;13633;13632;13638;13640;13636;13634;13639	ENSMUST00000194632;ENSMUST00000035325;ENSMUST00000195419;ENSMUST00000151368;ENSMUST00000140809;ENSMUST00000130701;ENSMUST00000111764;ENSMUST00000132495	GO:0000139(Golgi membrane);GO:0003756(protein disulfide isomerase activity);GO:0005576(extracellular region);GO:0005615(extracellular space);GO:0005783(endoplasmic reticulum);GO:0005794(Golgi apparatus);GO:0006457(protein folding);GO:0016020(membrane);GO:0016021(integral component of membrane);GO:0016242(negative regulation of macroautophagy);GO:0016491(oxidoreductase activity);GO:0016971(flavin-…	NA	K10758	EC:1.8.3.2	quiescin Q6 sulfhydryl oxidase 1 [Source:MGI Symbol;Acc:MGI:1330818]	protein_coding;retained_intron;processed_transcript	R_MMU_8957275(Post_translational_protein_phosphorylation);R_MMU_109582(Hemostasis);R_MMU_76002(Platelet_activation,_signaling_and_aggregation);R_MMU_597592(Post_translational_protein_modification);R_MMU_392499(Metabolism_of_proteins);R_MMU_168256(Immune_System);R_MMU_114608(Platelet_degranulation);R_MMU_6798695(Neutrophil_degranulation);R_MMU_168249(Innate_Immune_System);R_MMU_76005(Response_to_e…	8.75648	23.796	0.367981	-1.4423	1.01487e-12	3.8886e-11	down	yes
ENSMUSG00000039084	Chad	28220	ENSMUST00000040418	GO:0005515(protein binding);GO:0005576(extracellular region);GO:0005615(extracellular space);GO:0031012(extracellular matrix);GO:0060348(bone development);GO:1900155(negative regulation of bone trabecula formation)	04151(PI3K-Akt signaling pathway);04510(Focal adhesion);04512(ECM-receptor interaction);05165(Human papillomavirus infection)	K06248	NA	chondroadherin [Source:MGI Symbol;Acc:MGI:1096866]	protein_coding	NA	10.425	28.2745	0.368708	-1.43945	2.64086e-12	9.26815e-11	down	yes
ENSMUSG00000017491	Rarb	43014;43017;43013;43016;43012	ENSMUST00000223576;ENSMUST00000225356;ENSMUST00000225921;ENSMUST00000223976;ENSMUST00000063750	GO:0000122(negative regulation of transcription by RNA polymerase II);GO:0000977(RNA polymerase II regulatory region sequence-specific DNA binding);GO:0001657(ureteric bud development);GO:0002068(glandular epithelial cell development);GO:0003148(outflow tract septum morphogenesis);GO:0003417(growth plate cartilage development);GO:0003677(DNA binding);GO:0003700(DNA-binding transcription factor ac…	05200(Pathways in cancer);05222(Small cell lung cancer);05223(Non-small cell lung cancer);05226(Gastric cancer);05226(Gastric cancer)	K08528	NA	retinoic acid receptor, beta [Source:MGI Symbol;Acc:MGI:97857]	nonsense_mediated_decay;retained_intron;protein_coding	R_MMU_73857(RNA_Polymerase_II_Transcription);R_MMU_212436(Generic_Transcription_Pathway);R_MMU_9006931(Signaling_by_Nuclear_Receptors);R_MMU_383280(Nuclear_Receptor_transcription_pathway);R_MMU_162582(Signal_Transduction);R_MMU_74160(Gene_expression_(Transcription));R_MMU_5362517(Signaling_by_Retinoic_Acid)	0.241247	0.653294	0.369278	-1.43722	8.21093e-08	1.26215e-06	down	yes
ENSMUSG00000104943	Gm42868	88212	ENSMUST00000199168	NA	NA	NA	NA	predicted gene 42868 [Source:MGI Symbol;Acc:MGI:5663005]	sense_intronic	NA	0.715097	1.93599	0.36937	-1.43686	4.9153e-09	9.8823e-08	down	yes
ENSMUSG00000044393	Dsg2	65682;65683;65684	ENSMUST00000059787;ENSMUST00000120102;ENSMUST00000121837	GO:0002934(desmosome organization);GO:0003165(Purkinje myocyte development);GO:0005509(calcium ion binding);GO:0005886(plasma membrane);GO:0005911(cell-cell junction);GO:0007155(cell adhesion);GO:0007156(homophilic cell adhesion via plasma membrane adhesion molecules);GO:0014704(intercalated disc);GO:0016020(membrane);GO:0016021(integral component of membrane);GO:0016324(apical plasma membrane);G…	05412(Arrhythmogenic right ventricular cardiomyopathy (ARVC));05412(Arrhythmogenic right ventricular cardiomyopathy (ARVC))	K07597	NA	desmoglein 2 [Source:MGI Symbol;Acc:MGI:1196466]	protein_coding	R_MMU_6805567(Keratinization);R_MMU_9013423(RAC3_GTPase_cycle);R_MMU_111465(Apoptotic_cleavage_of_cellular_proteins);R_MMU_9012999(RHO_GTPase_cycle);R_MMU_9013404(RAC2_GTPase_cycle);R_MMU_5357801(Programmed_Cell_Death);R_MMU_75153(Apoptotic_execution_phase);R_MMU_9716542(Signaling_by_Rho_GTPases,_Miro_GTPases_and_RHOBTB3);R_MMU_194315(Signaling_by_Rho_GTPases);R_MMU_109581(Apoptosis);R_MMU_351906…	0.943827	2.55303	0.369689	-1.43562	1.60865e-11	4.90731e-10	down	yes
ENSMUSG00000027224	Duoxa1	80173;80170;80171;80169	ENSMUST00000147788;ENSMUST00000155561;ENSMUST00000028653;ENSMUST00000110537	GO:0005515(protein binding);GO:0005783(endoplasmic reticulum);GO:0005789(endoplasmic reticulum membrane);GO:0005886(plasma membrane);GO:0008104(protein localization);GO:0010729(positive regulation of hydrogen peroxide biosynthetic process);GO:0015031(protein transport);GO:0016020(membrane);GO:0016021(integral component of membrane);GO:0019899(enzyme binding);GO:0031252(cell leading edge);GO:00346…	NA	K17233	NA	dual oxidase maturation factor 1 [Source:MGI Symbol;Acc:MGI:2384861]	protein_coding;processed_transcript	NA	0.246146	0.665174	0.370048	-1.43422	2.60925e-07	3.62756e-06	down	yes
ENSMUSG00000060188	Cxcl17	117937;117936	ENSMUST00000200880;ENSMUST00000074040	GO:0000187(activation of MAPK activity);GO:0001525(angiogenesis);GO:0005576(extracellular region);GO:0005615(extracellular space);GO:0006935(chemotaxis);GO:0007204(positive regulation of cytosolic calcium ion concentration);GO:0007275(multicellular organism development);GO:0008009(chemokine activity);GO:0010575(positive regulation of vascular endothelial growth factor production);GO:0010759(posit…	04060(Cytokine-cytokine receptor interaction);04060(Cytokine-cytokine receptor interaction)	K22627	NA	chemokine (C-X-C motif) ligand 17 [Source:MGI Symbol;Acc:MGI:2387642]	protein_coding	NA	28.8727	78.0105	0.370113	-1.43396	2.52086e-12	8.92599e-11	down	yes
ENSMUSG00000040412	5330417C22Rik	88894;88899;88896;88897;88895;88898	ENSMUST00000106625;ENSMUST00000148237;ENSMUST00000185128;ENSMUST00000140357;ENSMUST00000048012;ENSMUST00000148493	GO:0000045(autophagosome assembly);GO:0005764(lysosome);GO:0005765(lysosomal membrane);GO:0005768(endosome);GO:0005770(late endosome);GO:0005783(endoplasmic reticulum);GO:0005789(endoplasmic reticulum membrane);GO:0005794(Golgi apparatus);GO:0005802(trans-Golgi network);GO:0005886(plasma membrane);GO:0005887(integral component of plasma membrane);GO:0006914(autophagy);GO:0009267(cellular response…	NA	NA	NA	RIKEN cDNA 5330417C22 gene [Source:MGI Symbol;Acc:MGI:1923930]	protein_coding;retained_intron;nonsense_mediated_decay;processed_transcript	NA	8.46801	22.8758	0.370173	-1.43373	1.45407e-12	5.37666e-11	down	yes
ENSMUSG00000049608	Gpr55	10982	ENSMUST00000086975	GO:0004930(G protein-coupled receptor activity);GO:0004949(cannabinoid receptor activity);GO:0005886(plasma membrane);GO:0005887(integral component of plasma membrane);GO:0007165(signal transduction);GO:0007186(G protein-coupled receptor signaling pathway);GO:0007202(activation of phospholipase C activity);GO:0016020(membrane);GO:0016021(integral component of membrane);GO:0035025(positive regulat…	NA	K08413	NA	G protein-coupled receptor 55 [Source:MGI Symbol;Acc:MGI:2685064]	protein_coding	R_MMU_373076(Class_A/1_(Rhodopsin_like_receptors));R_MMU_500792(GPCR_ligand_binding);R_MMU_372790(Signaling_by_GPCR);R_MMU_388396(GPCR_downstream_signalling);R_MMU_162582(Signal_Transduction);R_MMU_418594(G_alpha_(i)_signalling_events)	0.766212	2.069	0.37033	-1.43312	5.86201e-10	1.38583e-08	down	yes
ENSMUSG00000022226	Mcpt2	46335	ENSMUST00000015576	GO:0004252(serine-type endopeptidase activity);GO:0005615(extracellular space);GO:0006508(proteolysis);GO:0008233(peptidase activity);GO:0008236(serine-type peptidase activity);GO:0016787(hydrolase activity)	NA	K08662	EC:3.4.21.-	mast cell protease 2 [Source:MGI Symbol;Acc:MGI:96938]	protein_coding	NA	18.515	49.9794	0.370453	-1.43264	2.93765e-12	1.02193e-10	down	yes
ENSMUSG00000022528	Hes1	55304;55306;55303;55305	ENSMUST00000023171;ENSMUST00000161839;ENSMUST00000160592;ENSMUST00000161676	GO:0000122(negative regulation of transcription by RNA polymerase II);GO:0000785(chromatin);GO:0000977(RNA polymerase II regulatory region sequence-specific DNA binding);GO:0000981(DNA-binding transcription factor activity, RNA polymerase II-specific);GO:0001085(RNA polymerase II transcription factor binding);GO:0001217(DNA-binding transcription repressor activity);GO:0001227(DNA-binding transcri…	03460(Fanconi anemia pathway);04330(Notch signaling pathway);04950(Maturity onset diabetes of the young);05165(Human papillomavirus infection);05169(Epstein-Barr virus infection);05200(Pathways in cancer);05224(Breast cancer);05224(Breast cancer)	K06054	NA	hes family bHLH transcription factor 1 [Source:MGI Symbol;Acc:MGI:104853]	protein_coding;processed_transcript;retained_intron	NA	13.3445	35.9462	0.371235	-1.4296	2.45389e-12	8.70829e-11	down	yes
ENSMUSG00000069862	Rps12-ps9	134096	ENSMUST00000139165	NA	NA	NA	NA	ribosomal protein S12, pseudogene 9 [Source:MGI Symbol;Acc:MGI:3704324]	processed_pseudogene	NA	26.9351	72.4717	0.371663	-1.42793	8.99857e-12	2.83223e-10	down	yes
ENSMUSG00000057092	Fxyd3	119079;119082;119081;119085;119087;119080;119083;119089	ENSMUST00000167369;ENSMUST00000165862;ENSMUST00000165465;ENSMUST00000186839;ENSMUST00000169424;ENSMUST00000169313;ENSMUST00000165265;ENSMUST00000170456	GO:0005515(protein binding);GO:0005789(endoplasmic reticulum membrane);GO:0005886(plasma membrane);GO:0006811(ion transport);GO:0006813(potassium ion transport);GO:0006814(sodium ion transport);GO:0016020(membrane);GO:0016021(integral component of membrane);GO:0017080(sodium channel regulator activity);GO:0043269(regulation of ion transport);GO:0050790(regulation of catalytic activity);GO:0051117…	NA	K13361	NA	FXYD domain-containing ion transport regulator 3 [Source:MGI Symbol;Acc:MGI:107497]	protein_coding;retained_intron	R_MMU_936837(Ion_transport_by_P_type_ATPases);R_MMU_382551(Transport_of_small_molecules);R_MMU_5576891(Cardiac_conduction);R_MMU_5578775(Ion_homeostasis);R_MMU_397014(Muscle_contraction);R_MMU_983712(Ion_channel_transport)	0.724582	1.94852	0.371862	-1.42716	3.7808e-10	9.11472e-09	down	yes
ENSMUSG00000050994	Adgb	16291;16297;16296;16293;16294	ENSMUST00000179956;ENSMUST00000132573;ENSMUST00000045328;ENSMUST00000172530;ENSMUST00000208717	GO:0004198(calcium-dependent cysteine-type endopeptidase activity);GO:0005515(protein binding);GO:0006508(proteolysis);GO:0019825(oxygen binding);GO:0020037(heme binding);GO:0020037(heme binding)	NA	NA	NA	androglobin [Source:MGI Symbol;Acc:MGI:3605549]	protein_coding	NA	1.38822	3.73045	0.372133	-1.42611	1.56487e-11	4.80146e-10	down	yes
ENSMUSG00000030737	Slco2b1	123445;123448;123446	ENSMUST00000032985;ENSMUST00000154295;ENSMUST00000107086	GO:0001889(liver development);GO:0005515(protein binding);GO:0005886(plasma membrane);GO:0005887(integral component of plasma membrane);GO:0006811(ion transport);GO:0008514(organic anion transmembrane transporter activity);GO:0009925(basal plasma membrane);GO:0015125(bile acid transmembrane transporter activity);GO:0015347(sodium-independent organic anion transmembrane transporter activity);GO:00…	NA	NA	NA	solute carrier organic anion transporter family, member 2b1 [Source:MGI Symbol;Acc:MGI:1351872]	protein_coding	R_MMU_189445(Metabolism_of_porphyrins);R_MMU_1430728(Metabolism);R_MMU_425407(SLC_mediated_transmembrane_transport);R_MMU_382551(Transport_of_small_molecules);R_MMU_879518(Transport_of_organic_anions);R_MMU_189483(Heme_degradation);R_MMU_425397(Transport_of_vitamins,_nucleosides,_and_related_molecules)	0.925371	2.48612	0.372215	-1.42579	5.20196e-11	1.48148e-09	down	yes
ENSMUSG00000029811	Aoc1	109633;109635	ENSMUST00000162948;ENSMUST00000161184	GO:0005507(copper ion binding);GO:0008131(primary amine oxidase activity);GO:0009308(amine metabolic process);GO:0016491(oxidoreductase activity);GO:0046872(metal ion binding);GO:0048038(quinone binding);GO:0055114(oxidation-reduction process);GO:0055114(oxidation-reduction process)	00330(Arginine and proline metabolism);00340(Histidine metabolism);00380(Tryptophan metabolism);00380(Tryptophan metabolism)	K11182	EC:1.4.3.22	amine oxidase, copper-containing 1 [Source:MGI Symbol;Acc:MGI:1923757]	protein_coding;retained_intron	R_MMU_1430728(Metabolism);R_MMU_211945(Phase_I_Functionalization_of_compounds);R_MMU_168256(Immune_System);R_MMU_211859(Biological_oxidations);R_MMU_6798695(Neutrophil_degranulation);R_MMU_168249(Innate_Immune_System)	1.85287	4.97399	0.372511	-1.42465	4.4159e-11	1.27131e-09	down	yes
ENSMUSG00000079457	Gm7609	10904;10902	ENSMUST00000113402;ENSMUST00000161424	GO:0016021(integral component of membrane);GO:0016021(integral component of membrane)	NA	NA	NA	predicted pseudogene 7609 [Source:MGI Symbol;Acc:MGI:3644536]	protein_coding	NA	0.579471	1.55431	0.372815	-1.42347	4.74578e-07	6.17574e-06	down	yes
ENSMUSG00000040740	Slc25a34	97317	ENSMUST00000038661	GO:0001835(blastocyst hatching);GO:0005739(mitochondrion);GO:0005743(mitochondrial inner membrane);GO:0016020(membrane);GO:0016021(integral component of membrane)	NA	K15117	NA	solute carrier family 25, member 34 [Source:MGI Symbol;Acc:MGI:2686215]	protein_coding	NA	0.392286	1.0522	0.372823	-1.42344	2.12935e-07	3.02128e-06	down	yes
ENSMUSG00000113003	Gm47138	35065	ENSMUST00000223213	NA	NA	NA	NA	predicted gene, 47138 [Source:MGI Symbol;Acc:MGI:6095896]	TEC	NA	0.427197	1.14556	0.372915	-1.42308	3.83071e-08	6.27106e-07	down	yes
ENSMUSG00000104835	Gm5547	88595;88593;88594	ENSMUST00000196002;ENSMUST00000200182;ENSMUST00000198306	NA	NA	NA	NA	predicted gene 5547 [Source:MGI Symbol;Acc:MGI:3648206]	lincRNA	NA	3.89255	10.411	0.373888	-1.41932	6.19634e-10	1.45403e-08	down	yes
ENSMUSG00000052861	Dnah6	111039;111042	ENSMUST00000064948;ENSMUST00000114038	GO:0000166(nucleotide binding);GO:0003341(cilium movement);GO:0003774(motor activity);GO:0003777(microtubule motor activity);GO:0005524(ATP binding);GO:0005737(cytoplasm);GO:0005856(cytoskeleton);GO:0005874(microtubule);GO:0005929(cilium);GO:0007018(microtubule-based movement);GO:0008569(ATP-dependent microtubule motor activity, minus-end-directed);GO:0030286(dynein complex);GO:0036156(inner dyne…	05016(Huntington disease);05016(Huntington disease)	K10408	NA	dynein, axonemal, heavy chain 6 [Source:MGI Symbol;Acc:MGI:107744]	protein_coding;retained_intron	NA	3.35318	8.96571	0.374	-1.41889	2.56891e-12	9.03563e-11	down	yes
ENSMUSG00000075588	Hoxb2	28417;28416	ENSMUST00000100523;ENSMUST00000182030	GO:0000122(negative regulation of transcription by RNA polymerase II);GO:0000978(RNA polymerase II cis-regulatory region sequence-specific DNA binding);GO:0000981(DNA-binding transcription factor activity, RNA polymerase II-specific);GO:0001228(DNA-binding transcription activator activity, RNA polymerase II-specific);GO:0002011(morphogenesis of an epithelial sheet);GO:0003677(DNA binding);GO:0003…	NA	K09302	NA	homeobox B2 [Source:MGI Symbol;Acc:MGI:96183]	protein_coding;retained_intron	NA	0.603448	1.61276	0.374171	-1.41823	4.56753e-09	9.25347e-08	down	yes
ENSMUSG00000029086	Prom1	100889;100887;100899;100891;100885;100898;100905;100884;100897	ENSMUST00000177946;ENSMUST00000087441;ENSMUST00000196852;ENSMUST00000197750;ENSMUST00000196378;ENSMUST00000199739;ENSMUST00000198218;ENSMUST00000074113;ENSMUST00000197749	GO:0005783(endoplasmic reticulum);GO:0005793(endoplasmic reticulum-Golgi intermediate compartment);GO:0005886(plasma membrane);GO:0009986(cell surface);GO:0016020(membrane);GO:0016021(integral component of membrane);GO:0031528(microvillus membrane);GO:0042622(photoreceptor outer segment membrane);GO:0042805(actinin binding);GO:0045296(cadherin binding);GO:0045494(photoreceptor cell maintenance);G…	05202(Transcriptional misregulation in cancer);05202(Transcriptional misregulation in cancer)	K06532	NA	prominin 1 [Source:MGI Symbol;Acc:MGI:1100886]	protein_coding;retained_intron;processed_transcript	NA	4.23955	11.3239	0.374391	-1.41738	3.31913e-12	1.13964e-10	down	yes
ENSMUSG00000025420	Katnal2	68166;68174;68168;68173;68167;68172;68175	ENSMUST00000126153;ENSMUST00000138336;ENSMUST00000122984;ENSMUST00000125744;ENSMUST00000135029;ENSMUST00000026486;ENSMUST00000154665	GO:0000166(nucleotide binding);GO:0000922(spindle pole);GO:0005515(protein binding);GO:0005524(ATP binding);GO:0005634(nucleus);GO:0005737(cytoplasm);GO:0005819(spindle);GO:0005856(cytoskeleton);GO:0005874(microtubule);GO:0008017(microtubule binding);GO:0008568(microtubule-severing ATPase activity);GO:0016853(isomerase activity);GO:0016887(ATPase activity);GO:0031122(cytoplasmic microtubule organ…	NA	K07767	EC:5.6.1.1	katanin p60 subunit A-like 2 [Source:MGI Symbol;Acc:MGI:1924234]	protein_coding;retained_intron;nonsense_mediated_decay;processed_transcript	NA	0.427233	1.14065	0.374553	-1.41676	1.82623e-08	3.21883e-07	down	yes
ENSMUSG00000070473	Cldn3	105912	ENSMUST00000094245	GO:0001666(response to hypoxia);GO:0001934(positive regulation of protein phosphorylation);GO:0003382(epithelial cell morphogenesis);GO:0005198(structural molecule activity);GO:0005515(protein binding);GO:0005737(cytoplasm);GO:0005886(plasma membrane);GO:0005911(cell-cell junction);GO:0005923(bicellular tight junction);GO:0007155(cell adhesion);GO:0008285(negative regulation of cell population pr…	04514(Cell adhesion molecules (CAMs));04530(Tight junction);04670(Leukocyte transendothelial migration);05160(Hepatitis C)	K06087	NA	claudin 3 [Source:MGI Symbol;Acc:MGI:1329044]	protein_coding	NA	24.9823	66.6822	0.374647	-1.4164	3.33487e-12	1.14257e-10	down	yes
ENSMUSG00000022225	Cma1	46325;46324	ENSMUST00000022834;ENSMUST00000226280	GO:0004252(serine-type endopeptidase activity);GO:0005576(extracellular region);GO:0005615(extracellular space);GO:0006508(proteolysis);GO:0006518(peptide metabolic process);GO:0008233(peptidase activity);GO:0008236(serine-type peptidase activity);GO:0016787(hydrolase activity);GO:0022617(extracellular matrix disassembly);GO:0030141(secretory granule);GO:0030901(midbrain development);GO:0034769(b…	04614(Renin-angiotensin system);04614(Renin-angiotensin system)	K01329	EC:3.4.21.39	chymase 1, mast cell [Source:MGI Symbol;Acc:MGI:96941]	protein_coding	R_MMU_2980736(Peptide_hormone_metabolism);R_MMU_1474244(Extracellular_matrix_organization);R_MMU_1474228(Degradation_of_the_extracellular_matrix);R_MMU_392499(Metabolism_of_proteins);R_MMU_9006934(Signaling_by_Receptor_Tyrosine_Kinases);R_MMU_1433557(Signaling_by_SCF_KIT);R_MMU_162582(Signal_Transduction);R_MMU_2022377(Metabolism_of_Angiotensinogen_to_Angiotensins);R_MMU_1592389(Activation_of_Mat…	4.53585	12.1016	0.374814	-1.41575	1.07023e-10	2.88235e-09	down	yes
ENSMUSG00000028965	Tnfrsf9	97981;97976;97983;97979;97982	ENSMUST00000116257;ENSMUST00000105672;ENSMUST00000126707;ENSMUST00000139826;ENSMUST00000060901	GO:0005515(protein binding);GO:0005615(extracellular space);GO:0006915(apoptotic process);GO:0008285(negative regulation of cell population proliferation);GO:0009897(external side of plasma membrane);GO:0016020(membrane);GO:0016021(integral component of membrane);GO:0019955(cytokine binding);GO:0032693(negative regulation of interleukin-10 production);GO:0032695(negative regulation of interleukin…	04060(Cytokine-cytokine receptor interaction);04060(Cytokine-cytokine receptor interaction)	K05146	NA	tumor necrosis factor receptor superfamily, member 9 [Source:MGI Symbol;Acc:MGI:1101059]	protein_coding	R_MMU_5668541(TNFR2_non_canonical_NF_kB_pathway);R_MMU_5669034(TNFs_bind_their_physiological_receptors);R_MMU_168256(Immune_System);R_MMU_1280215(Cytokine_Signaling_in_Immune_system)	1.79192	4.77845	0.375	-1.41504	1.25544e-10	3.34707e-09	down	yes
ENSMUSG00000056752	Dnah9	25644;25648;25646	ENSMUST00000080665;ENSMUST00000108691;ENSMUST00000136124	GO:0000166(nucleotide binding);GO:0003341(cilium movement);GO:0003774(motor activity);GO:0003777(microtubule motor activity);GO:0005524(ATP binding);GO:0005737(cytoplasm);GO:0005856(cytoskeleton);GO:0005874(microtubule);GO:0005929(cilium);GO:0005930(axoneme);GO:0007018(microtubule-based movement);GO:0008569(ATP-dependent microtubule motor activity, minus-end-directed);GO:0030286(dynein complex);G…	05016(Huntington disease);05016(Huntington disease)	K10408	NA	dynein, axonemal, heavy chain 9 [Source:MGI Symbol;Acc:MGI:1289279]	protein_coding;retained_intron	NA	1.34711	3.58659	0.375595	-1.41275	5.11579e-12	1.69066e-10	down	yes
ENSMUSG00000037035	Inhbb	12100	ENSMUST00000038765	GO:0001654(eye development);GO:0005125(cytokine activity);GO:0005179(hormone activity);GO:0005576(extracellular region);GO:0005615(extracellular space);GO:0008083(growth factor activity);GO:0009267(cellular response to starvation);GO:0009611(response to wounding);GO:0010862(positive regulation of pathway-restricted SMAD protein phosphorylation);GO:0032869(cellular response to insulin stimulus);GO…	04060(Cytokine-cytokine receptor interaction);04350(TGF-beta signaling pathway);04550(Signaling pathways regulating pluripotency of stem cells)	K22687	NA	inhibin beta-B [Source:MGI Symbol;Acc:MGI:96571]	protein_coding	R_MMU_9006936(Signaling_by_TGFB_family_members);R_MMU_209952(Peptide_hormone_biosynthesis);R_MMU_209822(Glycoprotein_hormones);R_MMU_2980736(Peptide_hormone_metabolism);R_MMU_392499(Metabolism_of_proteins);R_MMU_2473224(Antagonism_of_Activin_by_Follistatin);R_MMU_1502540(Signaling_by_Activin);R_MMU_162582(Signal_Transduction)	1.98856	5.27835	0.376739	-1.40836	2.8859e-11	8.54613e-10	down	yes
ENSMUSG00000030268	Bcat1	115154;115155	ENSMUST00000032402;ENSMUST00000111742	GO:0003824(catalytic activity);GO:0004084(branched-chain-amino-acid transaminase activity);GO:0005737(cytoplasm);GO:0005739(mitochondrion);GO:0005829(cytosol);GO:0008483(transaminase activity);GO:0008652(cellular amino acid biosynthetic process);GO:0009081(branched-chain amino acid metabolic process);GO:0009082(branched-chain amino acid biosynthetic process);GO:0009083(branched-chain amino acid c…	00270(Cysteine and methionine metabolism);00280(Valine, leucine and isoleucine degradation);00290(Valine, leucine and isoleucine biosynthesis);00770(Pantothenate and CoA biosynthesis);00770(Pantothenate and CoA biosynthesis)	K00826	EC:2.6.1.42	branched chain aminotransferase 1, cytosolic [Source:MGI Symbol;Acc:MGI:104861]	protein_coding	R_MMU_70895(Branched_chain_amino_acid_catabolism);R_MMU_1430728(Metabolism);R_MMU_71291(Metabolism_of_amino_acids_and_derivatives)	0.282797	0.750211	0.376956	-1.40753	2.09399e-09	4.50093e-08	down	yes
ENSMUSG00000031584	Gsr	129546	ENSMUST00000033992	GO:0004362(glutathione-disulfide reductase activity);GO:0005737(cytoplasm);GO:0005739(mitochondrion);GO:0005829(cytosol);GO:0006749(glutathione metabolic process);GO:0007283(spermatogenesis);GO:0009897(external side of plasma membrane);GO:0016491(oxidoreductase activity);GO:0016668(oxidoreductase activity, acting on a sulfur group of donors, NAD(P) as acceptor);GO:0034599(cellular response to oxi…	00480(Glutathione metabolism);04918(Thyroid hormone synthesis)	K00383	EC:1.8.1.7	glutathione reductase [Source:MGI Symbol;Acc:MGI:95804]	protein_coding	R_MMU_499943(Interconversion_of_nucleotide_di__and_triphosphates);R_MMU_9711123(Cellular_response_to_chemical_stress);R_MMU_1430728(Metabolism);R_MMU_2262752(Cellular_responses_to_stress);R_MMU_73857(RNA_Polymerase_II_Transcription);R_MMU_212436(Generic_Transcription_Pathway);R_MMU_8953897(Cellular_responses_to_external_stimuli);R_MMU_3700989(Transcriptional_Regulation_by_TP53);R_MMU_5628897(TP53…	8.62738	22.8228	0.378015	-1.40348	6.32895e-12	2.06152e-10	down	yes
ENSMUSG00000108841	Frmpd2	44201;44203;44200;44202	ENSMUST00000208577;ENSMUST00000208380;ENSMUST00000208853;ENSMUST00000207581	GO:0005515(protein binding);GO:0005545(1-phosphatidylinositol binding);GO:0005856(cytoskeleton);GO:0005923(bicellular tight junction);GO:0016323(basolateral plasma membrane);GO:0070830(bicellular tight junction assembly);GO:0070830(bicellular tight junction assembly)	NA	NA	NA	FERM and PDZ domain containing 2 [Source:MGI Symbol;Acc:MGI:2685472]	protein_coding;processed_transcript;nonsense_mediated_decay	NA	1.38724	3.6697	0.378026	-1.40344	2.88768e-11	8.54613e-10	down	yes
ENSMUSG00000029851	Tcaf2	109287;109288	ENSMUST00000031879;ENSMUST00000131341	GO:0002244(hematopoietic progenitor cell differentiation);GO:0005886(plasma membrane);GO:0010359(regulation of anion channel activity);GO:0010360(negative regulation of anion channel activity);GO:0016020(membrane);GO:0030054(cell junction);GO:0030335(positive regulation of cell migration);GO:0044325(ion channel binding);GO:0090314(positive regulation of protein targeting to membrane);GO:0090314(p…	NA	NA	NA	TRPM8 channel-associated factor 2 [Source:MGI Symbol;Acc:MGI:2385258]	protein_coding;retained_intron	NA	1.0221	2.7021	0.378262	-1.40254	1.62804e-10	4.23572e-09	down	yes
ENSMUSG00000021943	Gdf10	44211	ENSMUST00000168727	GO:0001503(ossification);GO:0001649(osteoblast differentiation);GO:0005125(cytokine activity);GO:0005576(extracellular region);GO:0005615(extracellular space);GO:0008083(growth factor activity);GO:0010862(positive regulation of pathway-restricted SMAD protein phosphorylation);GO:0045444(fat cell differentiation);GO:0045668(negative regulation of osteoblast differentiation);GO:0045669(positive reg…	04060(Cytokine-cytokine receptor interaction)	K22674	NA	growth differentiation factor 10 [Source:MGI Symbol;Acc:MGI:95684]	protein_coding	NA	0.937007	2.47404	0.378736	-1.40073	1.79056e-10	4.58444e-09	down	yes
ENSMUSG00000047842	Diras2	39156	ENSMUST00000057442	GO:0000166(nucleotide binding);GO:0003924(GTPase activity);GO:0005525(GTP binding);GO:0005886(plasma membrane);GO:0007165(signal transduction);GO:0008150(biological_process);GO:0016020(membrane);GO:0019003(GDP binding)	NA	K07841	NA	DIRAS family, GTP-binding RAS-like 2 [Source:MGI Symbol;Acc:MGI:1915453]	protein_coding	NA	1.73672	4.58228	0.379008	-1.3997	3.8587e-11	1.11902e-09	down	yes
ENSMUSG00000052430	Bmpr1b	90216;90218;90220;90219	ENSMUST00000029948;ENSMUST00000131273;ENSMUST00000106230;ENSMUST00000098568	GO:0000166(nucleotide binding);GO:0001501(skeletal system development);GO:0001502(cartilage condensation);GO:0001550(ovarian cumulus expansion);GO:0001654(eye development);GO:0002062(chondrocyte differentiation);GO:0002063(chondrocyte development);GO:0004672(protein kinase activity);GO:0004674(protein serine/threonine kinase activity);GO:0004675(transmembrane receptor protein serine/threonine kin…	04060(Cytokine-cytokine receptor interaction);04350(TGF-beta signaling pathway);04360(Axon guidance);04390(Hippo signaling pathway);04550(Signaling pathways regulating pluripotency of stem cells);05418(Fluid shear stress and atherosclerosis);05418(Fluid shear stress and atherosclerosis)	K13578	EC:2.7.11.30	bone morphogenetic protein receptor, type 1B [Source:MGI Symbol;Acc:MGI:107191]	protein_coding;nonsense_mediated_decay	R_MMU_201451(Signaling_by_BMP);R_MMU_9006936(Signaling_by_TGFB_family_members);R_MMU_162582(Signal_Transduction)	0.670244	1.76508	0.379723	-1.39698	3.53896e-10	8.62344e-09	down	yes
ENSMUSG00000092192	Dnaaf4	138890	ENSMUST00000034734	GO:0001764(neuron migration);GO:0003341(cilium movement);GO:0003351(epithelial cilium movement involved in extracellular fluid movement);GO:0005515(protein binding);GO:0005576(extracellular region);GO:0005634(nucleus);GO:0005737(cytoplasm);GO:0005813(centrosome);GO:0005829(cytosol);GO:0005886(plasma membrane);GO:0007368(determination of left/right symmetry);GO:0007399(nervous system development);…	NA	K19758	NA	dynein axonemal assembly factor 4 [Source:MGI Symbol;Acc:MGI:1914935]	protein_coding	NA	1.28028	3.37123	0.379766	-1.39682	2.8855e-09	5.98336e-08	down	yes
ENSMUSG00000026546	Cfap45	14813;14812;14818;14819;14814;14817	ENSMUST00000085894;ENSMUST00000194051;ENSMUST00000159395;ENSMUST00000160303;ENSMUST00000160531;ENSMUST00000159792	GO:0003674(molecular_function);GO:0005654(nucleoplasm);GO:0008150(biological_process);GO:0008150(biological_process)	NA	NA	NA	cilia and flagella associated protein 45 [Source:MGI Symbol;Acc:MGI:1919120]	protein_coding;retained_intron	NA	1.71704	4.51681	0.380145	-1.39538	3.08047e-11	9.09973e-10	down	yes
ENSMUSG00000050138	Kcnk12	64880	ENSMUST00000055221	GO:0005244(voltage-gated ion channel activity);GO:0005267(potassium channel activity);GO:0005887(integral component of plasma membrane);GO:0006811(ion transport);GO:0016020(membrane);GO:0016021(integral component of membrane);GO:0022841(potassium ion leak channel activity);GO:0030322(stabilization of membrane potential);GO:0034765(regulation of ion transmembrane transport);GO:0071805(potassium io…	NA	K04921	NA	potassium channel, subfamily K, member 12 [Source:MGI Symbol;Acc:MGI:2684043]	protein_coding	R_MMU_5576886(Phase_4_resting_membrane_potential);R_MMU_5576891(Cardiac_conduction);R_MMU_397014(Muscle_contraction)	0.7666	2.01614	0.380231	-1.39505	5.68312e-08	9.01485e-07	down	yes
ENSMUSG00000015083	C8g	74270;74274;74271;74273;74269	ENSMUST00000015227;ENSMUST00000154984;ENSMUST00000150580;ENSMUST00000149062;ENSMUST00000040042	GO:0001848(complement binding);GO:0002376(immune system process);GO:0005576(extracellular region);GO:0005579(membrane attack complex);GO:0005615(extracellular space);GO:0006956(complement activation);GO:0006957(complement activation, alternative pathway);GO:0006958(complement activation, classical pathway);GO:0019835(cytolysis);GO:0019841(retinol binding);GO:0044877(protein-containing complex bin…	04610(Complement and coagulation cascades);05020(Prion diseases);05146(Amoebiasis);05322(Systemic lupus erythematosus);05322(Systemic lupus erythematosus)	K03999	NA	complement component 8, gamma polypeptide [Source:MGI Symbol;Acc:MGI:88237]	protein_coding;processed_transcript	R_MMU_977606(Regulation_of_Complement_cascade);R_MMU_166665(Terminal_pathway_of_complement);R_MMU_166658(Complement_cascade);R_MMU_168256(Immune_System);R_MMU_168249(Innate_Immune_System)	0.636095	1.672	0.38044	-1.39426	9.28535e-07	1.12524e-05	down	yes
ENSMUSG00000076619	Ighj3	36309	ENSMUST00000103428	NA	NA	NA	NA	immunoglobulin heavy joining 3 [Source:MGI Symbol;Acc:MGI:4439767]	IG_J_gene	NA	707.257	1857.47	0.380764	-1.39303	6.81262e-12	2.19652e-10	down	yes
ENSMUSG00000031831	Dnaaf1	133726	ENSMUST00000093100	GO:0001947(heart looping);GO:0003341(cilium movement);GO:0003356(regulation of cilium beat frequency);GO:0005515(protein binding);GO:0005829(cytosol);GO:0005886(plasma membrane);GO:0005929(cilium);GO:0005930(axoneme);GO:0016607(nuclear speck);GO:0030324(lung development);GO:0035469(determination of pancreatic left/right asymmetry);GO:0036158(outer dynein arm assembly);GO:0036159(inner dynein arm …	NA	K19750	NA	dynein, axonemal assembly factor 1 [Source:MGI Symbol;Acc:MGI:1915520]	protein_coding	NA	1.68695	4.42614	0.381133	-1.39164	2.2155e-10	5.57849e-09	down	yes
ENSMUSG00000093896	Ighv1-76	36594	ENSMUST00000169155	GO:0003823(antigen binding);GO:0006910(phagocytosis, recognition);GO:0006911(phagocytosis, engulfment);GO:0006958(complement activation, classical pathway);GO:0009897(external side of plasma membrane);GO:0034987(immunoglobulin receptor binding);GO:0042571(immunoglobulin complex, circulating);GO:0042742(defense response to bacterium);GO:0045087(innate immune response);GO:0050853(B cell receptor si…	NA	NA	NA	immunoglobulin heavy variable 1-76 [Source:MGI Symbol;Acc:MGI:4439737]	IG_V_gene	R_MMU_2871809(FCERI_mediated_Ca+2_mobilization);R_MMU_977606(Regulation_of_Complement_cascade);R_MMU_5653656(Vesicle_mediated_transport);R_MMU_2029481(FCGR_activation);R_MMU_2029480(Fcgamma_receptor_(FCGR)_dependent_phagocytosis);R_MMU_983705(Signaling_by_the_B_Cell_Receptor_(BCR));R_MMU_109582(Hemostasis);R_MMU_173623(Classical_antibody_mediated_complement_activation);R_MMU_166663(Initial_trigge…	16.667	43.7281	0.38115	-1.39157	1.06116e-10	2.86278e-09	down	yes
ENSMUSG00000053318	Slamf8	14825;14826	ENSMUST00000065679;ENSMUST00000193843	GO:0016020(membrane);GO:0016021(integral component of membrane);GO:0016021(integral component of membrane)	NA	K16853	NA	SLAM family member 8 [Source:MGI Symbol;Acc:MGI:1921998]	protein_coding;retained_intron	NA	1.24228	3.25691	0.38143	-1.39051	5.57027e-10	1.31882e-08	down	yes
ENSMUSG00000041660	Bbox1	79262;79263	ENSMUST00000046233;ENSMUST00000133608	GO:0005506(iron ion binding);GO:0005737(cytoplasm);GO:0005739(mitochondrion);GO:0008270(zinc ion binding);GO:0008336(gamma-butyrobetaine dioxygenase activity);GO:0016491(oxidoreductase activity);GO:0042802(identical protein binding);GO:0045329(carnitine biosynthetic process);GO:0046872(metal ion binding);GO:0051213(dioxygenase activity);GO:0055114(oxidation-reduction process);GO:0055114(oxidation…	00310(Lysine degradation);00310(Lysine degradation)	K00471	EC:1.14.11.1	butyrobetaine (gamma), 2-oxoglutarate dioxygenase 1 (gamma-butyrobetaine hydroxylase) [Source:MGI Symbol;Acc:MGI:1891372]	protein_coding	R_MMU_1430728(Metabolism);R_MMU_71262(Carnitine_synthesis);R_MMU_71291(Metabolism_of_amino_acids_and_derivatives)	0.651305	1.70275	0.382501	-1.38646	2.58254e-09	5.4046e-08	down	yes
ENSMUSG00000020178	Adora2a	18827	ENSMUST00000105420	GO:0001609(G protein-coupled adenosine receptor activity);GO:0001963(synaptic transmission, dopaminergic);GO:0001973(G protein-coupled adenosine receptor signaling pathway);GO:0001975(response to amphetamine);GO:0004930(G protein-coupled receptor activity);GO:0005515(protein binding);GO:0005882(intermediate filament);GO:0005886(plasma membrane);GO:0005887(integral component of plasma membrane);GO…	04015(Rap1 signaling pathway);04020(Calcium signaling pathway);04024(cAMP signaling pathway);04080(Neuroactive ligand-receptor interaction);04270(Vascular smooth muscle contraction);05012(Parkinson disease);05034(Alcoholism)	K04266	NA	adenosine A2a receptor [Source:MGI Symbol;Acc:MGI:99402]	protein_coding	R_MMU_373076(Class_A/1_(Rhodopsin_like_receptors));R_MMU_417973(Adenosine_P1_receptors);R_MMU_5683826(Surfactant_metabolism);R_MMU_500792(GPCR_ligand_binding);R_MMU_418555(G_alpha_(s)_signalling_events);R_MMU_392499(Metabolism_of_proteins);R_MMU_372790(Signaling_by_GPCR);R_MMU_388396(GPCR_downstream_signalling);R_MMU_418038(Nucleotide_like_(purinergic)_receptors);R_MMU_162582(Signal_Transduction)	0.562762	1.47062	0.382671	-1.38582	2.58814e-08	4.39568e-07	down	yes
ENSMUSG00000049571	Cfap46	127017;127016;127018;127021;127020;127025	ENSMUST00000129990;ENSMUST00000196540;ENSMUST00000093991;ENSMUST00000140820;ENSMUST00000155075;ENSMUST00000138129	GO:0003674(molecular_function);GO:0035082(axoneme assembly);GO:0060294(cilium movement involved in cell motility);GO:0060294(cilium movement involved in cell motility)	NA	NA	NA	cilia and flagella associated protein 46 [Source:MGI Symbol;Acc:MGI:2444387]	protein_coding;retained_intron;nonsense_mediated_decay	NA	1.53834	4.01604	0.38305	-1.3844	2.14735e-11	6.48828e-10	down	yes
ENSMUSG00000037143	Cfap61	81307;81305;81315;81308;81310;81303;81302	ENSMUST00000133433;ENSMUST00000138774;ENSMUST00000167179;ENSMUST00000118002;ENSMUST00000150771;ENSMUST00000126415;ENSMUST00000116398	GO:0016020(membrane);GO:0016021(integral component of membrane);GO:0016021(integral component of membrane)	NA	NA	NA	cilia and flagella associated protein 61 [Source:MGI Symbol;Acc:MGI:1926024]	protein_coding;retained_intron	NA	1.03307	2.6967	0.383085	-1.38426	3.80354e-11	1.10911e-09	down	yes
ENSMUSG00000076522	Igkv16-104	110583	ENSMUST00000103323	GO:0002377(immunoglobulin production);GO:0005615(extracellular space);GO:0006955(immune response)	NA	NA	NA	immunoglobulin kappa variable 16-104 [Source:MGI Symbol;Acc:MGI:2685913]	IG_V_gene	R_MMU_2871809(FCERI_mediated_Ca+2_mobilization);R_MMU_977606(Regulation_of_Complement_cascade);R_MMU_5653656(Vesicle_mediated_transport);R_MMU_2029481(FCGR_activation);R_MMU_2029480(Fcgamma_receptor_(FCGR)_dependent_phagocytosis);R_MMU_983705(Signaling_by_the_B_Cell_Receptor_(BCR));R_MMU_109582(Hemostasis);R_MMU_173623(Classical_antibody_mediated_complement_activation);R_MMU_166663(Initial_trigge…	320.526	836.386	0.383228	-1.38372	5.97885e-12	1.95956e-10	down	yes
ENSMUSG00000022783	Spag6l	54161;54166;54168;54162	ENSMUST00000023468;ENSMUST00000132033;ENSMUST00000141835;ENSMUST00000154624	GO:0005515(protein binding);GO:0005737(cytoplasm);GO:0005856(cytoskeleton);GO:0005874(microtubule);GO:0005929(cilium);GO:0006931(substrate-dependent cell migration, cell attachment to substrate);GO:0007288(sperm axoneme assembly);GO:0010761(fibroblast migration);GO:0015630(microtubule cytoskeleton);GO:0021591(ventricular system development);GO:0030030(cell projection organization);GO:0030317(flag…	NA	NA	NA	sperm associated antigen 6-like [Source:MGI Symbol;Acc:MGI:1354388]	protein_coding;processed_transcript;retained_intron	NA	2.94357	7.68061	0.383246	-1.38366	2.78343e-11	8.29955e-10	down	yes
ENSMUSG00000079445	B3gnt7	11028;11026	ENSMUST00000113306;ENSMUST00000189618	GO:0000139(Golgi membrane);GO:0005794(Golgi apparatus);GO:0006486(protein glycosylation);GO:0008375(acetylglucosaminyltransferase activity);GO:0008376(acetylgalactosaminyltransferase activity);GO:0008532(N-acetyllactosaminide beta-1,3-N-acetylglucosaminyltransferase activity);GO:0016020(membrane);GO:0016021(integral component of membrane);GO:0016740(transferase activity);GO:0016757(transferase ac…	00533(Glycosaminoglycan biosynthesis - keratan sulfate);00533(Glycosaminoglycan biosynthesis - keratan sulfate)	K09664	EC:2.4.1.-	UDP-GlcNAc:betaGal beta-1,3-N-acetylglucosaminyltransferase 7 [Source:MGI Symbol;Acc:MGI:2384394]	protein_coding;retained_intron	R_MMU_913709(O_linked_glycosylation_of_mucins);R_MMU_71387(Metabolism_of_carbohydrates);R_MMU_1430728(Metabolism);R_MMU_5173105(O_linked_glycosylation);R_MMU_2022854(Keratan_sulfate_biosynthesis);R_MMU_597592(Post_translational_protein_modification);R_MMU_392499(Metabolism_of_proteins);R_MMU_1638074(Keratan_sulfate/keratin_metabolism);R_MMU_1630316(Glycosaminoglycan_metabolism)	0.68234	1.77958	0.383428	-1.38297	2.7592e-09	5.74398e-08	down	yes
ENSMUSG00000051367	Six1	33728;33727;33730	ENSMUST00000050029;ENSMUST00000176310;ENSMUST00000175677	GO:0000122(negative regulation of transcription by RNA polymerase II);GO:0000976(transcription regulatory region sequence-specific DNA binding);GO:0000978(RNA polymerase II cis-regulatory region sequence-specific DNA binding);GO:0000981(DNA-binding transcription factor activity, RNA polymerase II-specific);GO:0001223(transcription coactivator binding);GO:0001228(DNA-binding transcription activato…	05202(Transcriptional misregulation in cancer);05202(Transcriptional misregulation in cancer)	K15614	NA	sine oculis-related homeobox 1 [Source:MGI Symbol;Acc:MGI:102780]	protein_coding;processed_transcript	NA	1.21481	3.16111	0.384298	-1.3797	2.17475e-10	5.49333e-09	down	yes
ENSMUSG00000078202	Nrarp	74103	ENSMUST00000104999	GO:0000122(negative regulation of transcription by RNA polymerase II);GO:0001569(branching involved in blood vessel morphogenesis);GO:0001938(positive regulation of endothelial cell proliferation);GO:0002040(sprouting angiogenesis);GO:0002043(blood vessel endothelial cell proliferation involved in sprouting angiogenesis);GO:0005515(protein binding);GO:0005575(cellular_component);GO:0007219(Notch …	NA	NA	NA	Notch-regulated ankyrin repeat protein [Source:MGI Symbol;Acc:MGI:1914372]	protein_coding	NA	5.35036	13.9181	0.384418	-1.37925	2.73872e-11	8.1816e-10	down	yes
ENSMUSG00000028919	Arhgef19	97256;97254;97255;97257;97253;97260	ENSMUST00000006618;ENSMUST00000140536;ENSMUST00000138096;ENSMUST00000125392;ENSMUST00000141834;ENSMUST00000184162	GO:0005085(guanyl-nucleotide exchange factor activity);GO:0005089(Rho guanyl-nucleotide exchange factor activity);GO:0005096(GTPase activator activity);GO:0005515(protein binding);GO:0032956(regulation of actin cytoskeleton organization);GO:0042060(wound healing);GO:0043547(positive regulation of GTPase activity);GO:0090630(activation of GTPase activity);GO:0090630(activation of GTPase activity)	NA	K20691	NA	Rho guanine nucleotide exchange factor (GEF) 19 [Source:MGI Symbol;Acc:MGI:1925912]	protein_coding;retained_intron	R_MMU_204998(Cell_death_signalling_via_NRAGE,_NRIF_and_NADE);R_MMU_73887(Death_Receptor_Signalling);R_MMU_8980692(RHOA_GTPase_cycle);R_MMU_9012999(RHO_GTPase_cycle);R_MMU_193704(p75_NTR_receptor_mediated_signalling);R_MMU_9716542(Signaling_by_Rho_GTPases,_Miro_GTPases_and_RHOBTB3);R_MMU_9013148(CDC42_GTPase_cycle);R_MMU_193648(NRAGE_signals_death_through_JNK);R_MMU_416482(G_alpha_(12/13)_signalli…	1.3275	3.43966	0.385941	-1.37355	2.57624e-10	6.40546e-09	down	yes
ENSMUSG00000035694	Caps2	21396;21397;21398	ENSMUST00000092176;ENSMUST00000170013;ENSMUST00000132994	GO:0005509(calcium ion binding);GO:0005575(cellular_component);GO:0046872(metal ion binding);GO:0046872(metal ion binding)	NA	NA	NA	calcyphosphine 2 [Source:MGI Symbol;Acc:MGI:2441980]	protein_coding;processed_transcript	NA	0.423748	1.09711	0.386241	-1.37243	9.44633e-08	1.43807e-06	down	yes
ENSMUSG00000040899	Ccr6	58181;58178;58174;58180;58173;58175	ENSMUST00000231545;ENSMUST00000180103;ENSMUST00000164411;ENSMUST00000232412;ENSMUST00000231340;ENSMUST00000097418	GO:0002523(leukocyte migration involved in inflammatory response);GO:0004930(G protein-coupled receptor activity);GO:0004950(chemokine receptor activity);GO:0005515(protein binding);GO:0005886(plasma membrane);GO:0006935(chemotaxis);GO:0006955(immune response);GO:0007165(signal transduction);GO:0007186(G protein-coupled receptor signaling pathway);GO:0007204(positive regulation of cytosolic calci…	04060(Cytokine-cytokine receptor interaction);04062(Chemokine signaling pathway);04062(Chemokine signaling pathway)	K04181	NA	chemokine (C-C motif) receptor 6 [Source:MGI Symbol;Acc:MGI:1333797]	protein_coding;processed_transcript	R_MMU_373076(Class_A/1_(Rhodopsin_like_receptors));R_MMU_6803157(Antimicrobial_peptides);R_MMU_380108(Chemokine_receptors_bind_chemokines);R_MMU_375276(Peptide_ligand_binding_receptors);R_MMU_500792(GPCR_ligand_binding);R_MMU_168256(Immune_System);R_MMU_1461973(Defensins);R_MMU_372790(Signaling_by_GPCR);R_MMU_388396(GPCR_downstream_signalling);R_MMU_168249(Innate_Immune_System);R_MMU_162582(Signa…	0.8376	2.16577	0.386745	-1.37054	2.70232e-08	4.5749e-07	down	yes
ENSMUSG00000030889	Vwa3a	125477;125476;125481;125478;125474;125479;125475	ENSMUST00000167213;ENSMUST00000166668;ENSMUST00000166083;ENSMUST00000165055;ENSMUST00000168600;ENSMUST00000207721;ENSMUST00000033180	GO:0003674(molecular_function);GO:0005575(cellular_component);GO:0008150(biological_process);GO:0008150(biological_process)	NA	NA	NA	von Willebrand factor A domain containing 3A [Source:MGI Symbol;Acc:MGI:3041229]	protein_coding;nonsense_mediated_decay;retained_intron	NA	2.46519	6.37232	0.386859	-1.37012	2.63405e-11	7.88376e-10	down	yes
ENSMUSG00000035769	Xylb	142049;142053;142052;142050	ENSMUST00000039610;ENSMUST00000213383;ENSMUST00000216838;ENSMUST00000215305	GO:0000166(nucleotide binding);GO:0004856(xylulokinase activity);GO:0005524(ATP binding);GO:0005829(cytosol);GO:0005975(carbohydrate metabolic process);GO:0005997(xylulose metabolic process);GO:0016301(kinase activity);GO:0016310(phosphorylation);GO:0016740(transferase activity);GO:0016773(phosphotransferase activity, alcohol group as acceptor);GO:0042732(D-xylose metabolic process);GO:0046835(ca…	00040(Pentose and glucuronate interconversions);00040(Pentose and glucuronate interconversions)	K00854	EC:2.7.1.17	xylulokinase homolog (H. influenzae) [Source:MGI Symbol;Acc:MGI:2142985]	protein_coding;retained_intron;nonsense_mediated_decay;processed_transcript	R_MMU_5661270(Formation_of_xylulose_5_phosphate);R_MMU_71387(Metabolism_of_carbohydrates);R_MMU_1430728(Metabolism)	0.787168	2.03444	0.386922	-1.36989	1.96225e-09	4.24076e-08	down	yes
ENSMUSG00000094134	Ighv5-15	36378;36379	ENSMUST00000103457;ENSMUST00000192877	GO:0003823(antigen binding);GO:0006910(phagocytosis, recognition);GO:0006911(phagocytosis, engulfment);GO:0006958(complement activation, classical pathway);GO:0009897(external side of plasma membrane);GO:0034987(immunoglobulin receptor binding);GO:0042571(immunoglobulin complex, circulating);GO:0042742(defense response to bacterium);GO:0045087(innate immune response);GO:0050853(B cell receptor si…	NA	NA	NA	immunoglobulin heavy variable 5-15 [Source:MGI Symbol;Acc:MGI:4439812]	IG_V_gene	R_MMU_2871809(FCERI_mediated_Ca+2_mobilization);R_MMU_977606(Regulation_of_Complement_cascade);R_MMU_5653656(Vesicle_mediated_transport);R_MMU_2029481(FCGR_activation);R_MMU_2029480(Fcgamma_receptor_(FCGR)_dependent_phagocytosis);R_MMU_983705(Signaling_by_the_B_Cell_Receptor_(BCR));R_MMU_109582(Hemostasis);R_MMU_173623(Classical_antibody_mediated_complement_activation);R_MMU_166663(Initial_trigge…	51.4713	132.909	0.387268	-1.3686	2.34479e-11	7.07136e-10	down	yes
ENSMUSG00000061802	Armc4	65232;65237	ENSMUST00000234788;ENSMUST00000234458	GO:0003341(cilium movement);GO:0003356(regulation of cilium beat frequency);GO:0003674(molecular_function);GO:0005515(protein binding);GO:0005737(cytoplasm);GO:0005856(cytoskeleton);GO:0005929(cilium);GO:0005930(axoneme);GO:0007368(determination of left/right symmetry);GO:0007507(heart development);GO:0021591(ventricular system development);GO:0030030(cell projection organization);GO:0036158(oute…	NA	NA	NA	armadillo repeat containing 4 [Source:MGI Symbol;Acc:MGI:1922184]	protein_coding;retained_intron	NA	1.27832	3.2963	0.387806	-1.36659	3.5542e-10	8.64728e-09	down	yes
ENSMUSG00000028637	Ccdc30	95315;95341;95328;95332;95324;95333;95330;95317;95319;95338;95325;95329;95345;95316;95342;95321;95339	ENSMUST00000238759;ENSMUST00000135997;ENSMUST00000044781;ENSMUST00000148236;ENSMUST00000146186;ENSMUST00000238721;ENSMUST00000238300;ENSMUST00000238697;ENSMUST00000238293;ENSMUST00000127474;ENSMUST00000124048;ENSMUST00000131141;ENSMUST00000238559;ENSMUST00000154606;ENSMUST00000238287;ENSMUST00000238511;ENSMUST00000238719	GO:0003674(molecular_function);GO:0005575(cellular_component);GO:0008150(biological_process);GO:0008150(biological_process)	NA	NA	NA	coiled-coil domain containing 30 [Source:MGI Symbol;Acc:MGI:1920582]	protein_coding;retained_intron;processed_transcript	NA	0.604436	1.55807	0.387939	-1.3661	1.62882e-10	4.23572e-09	down	yes
ENSMUSG00000038775	Vill	142001;142005;142002;142000;142008;142003	ENSMUST00000153454;ENSMUST00000126251;ENSMUST00000074734;ENSMUST00000051386;ENSMUST00000151638;ENSMUST00000131647	GO:0003779(actin binding);GO:0005546(phosphatidylinositol-4,5-bisphosphate binding);GO:0005737(cytoplasm);GO:0007010(cytoskeleton organization);GO:0008154(actin polymerization or depolymerization);GO:0015629(actin cytoskeleton);GO:0051014(actin filament severing);GO:0051015(actin filament binding);GO:0051016(barbed-end actin filament capping);GO:0051693(actin filament capping);GO:0051693(actin fi…	NA	NA	NA	villin-like [Source:MGI Symbol;Acc:MGI:1201781]	retained_intron;protein_coding;processed_transcript	NA	2.13949	5.5116	0.388179	-1.36521	8.86281e-11	2.41565e-09	down	yes
ENSMUSG00000034981	Parm1	102611	ENSMUST00000040576	GO:0000139(Golgi membrane);GO:0003674(molecular_function);GO:0005654(nucleoplasm);GO:0005768(endosome);GO:0005769(early endosome);GO:0005770(late endosome);GO:0005794(Golgi apparatus);GO:0005829(cytosol);GO:0005886(plasma membrane);GO:0010008(endosome membrane);GO:0016020(membrane);GO:0016021(integral component of membrane);GO:0043231(intracellular membrane-bounded organelle);GO:0051973(positive …	NA	NA	NA	prostate androgen-regulated mucin-like protein 1 [Source:MGI Symbol;Acc:MGI:2443349]	protein_coding	NA	2.19953	5.66324	0.388386	-1.36444	6.37059e-11	1.79497e-09	down	yes
ENSMUSG00000038286	Bphl	38282;38286;38283;38284	ENSMUST00000040656;ENSMUST00000220717;ENSMUST00000222658;ENSMUST00000221124	GO:0005737(cytoplasm);GO:0005739(mitochondrion);GO:0016787(hydrolase activity);GO:0016787(hydrolase activity)	NA	K18399	EC:3.1.-.-	biphenyl hydrolase-like (serine hydrolase, breast epithelial mucin-associated antigen) [Source:MGI Symbol;Acc:MGI:1915271]	protein_coding;processed_transcript;nonsense_mediated_decay;retained_intron	R_MMU_1430728(Metabolism);R_MMU_211945(Phase_I_Functionalization_of_compounds);R_MMU_211859(Biological_oxidations)	6.66202	17.1145	0.389262	-1.36118	2.86673e-11	8.53188e-10	down	yes
ENSMUSG00000021062	Rab15	33905;33906;33907;33912;33911;33908;33909	ENSMUST00000021459;ENSMUST00000143863;ENSMUST00000122419;ENSMUST00000134124;ENSMUST00000141622;ENSMUST00000121716;ENSMUST00000118604	GO:0003924(GTPase activity);GO:0005525(GTP binding);GO:0005737(cytoplasm);GO:0005929(cilium);GO:0010008(endosome membrane);GO:0032482(Rab protein signal transduction);GO:0048471(perinuclear region of cytoplasm);GO:1903307(positive regulation of regulated secretory pathway);GO:1903307(positive regulation of regulated secretory pathway)	NA	K07908	NA	RAB15, member RAS oncogene family [Source:MGI Symbol;Acc:MGI:1916865]	protein_coding;retained_intron	R_MMU_8873719(RAB_geranylgeranylation);R_MMU_597592(Post_translational_protein_modification);R_MMU_392499(Metabolism_of_proteins)	3.4431	8.83216	0.389836	-1.35906	4.16173e-11	1.2025e-09	down	yes
ENSMUSG00000042116	Vwa1	98425	ENSMUST00000042196	GO:0005201(extracellular matrix structural constituent);GO:0005515(protein binding);GO:0005576(extracellular region);GO:0005604(basement membrane);GO:0005614(interstitial matrix);GO:0030198(extracellular matrix organization);GO:0031012(extracellular matrix);GO:0042802(identical protein binding);GO:0048266(behavioral response to pain);GO:0062023(collagen-containing extracellular matrix)	NA	NA	NA	von Willebrand factor A domain containing 1 [Source:MGI Symbol;Acc:MGI:2179729]	protein_coding	R_MMU_8957275(Post_translational_protein_phosphorylation);R_MMU_597592(Post_translational_protein_modification);R_MMU_392499(Metabolism_of_proteins);R_MMU_381426(Regulation_of_Insulin_like_Growth_Factor_(IGF)_transport_and_uptake_by_Insulin_like_Growth_Factor_Binding_Proteins_(IGFBPs))	0.582563	1.49393	0.389954	-1.35862	2.08634e-08	3.63289e-07	down	yes
ENSMUSG00000041798	Gck	23016;23017;23018	ENSMUST00000109823;ENSMUST00000102920;ENSMUST00000125434	GO:0000166(nucleotide binding);GO:0000287(magnesium ion binding);GO:0001678(cellular glucose homeostasis);GO:0003824(catalytic activity);GO:0004340(glucokinase activity);GO:0004396(hexokinase activity);GO:0005515(protein binding);GO:0005524(ATP binding);GO:0005536(glucose binding);GO:0005634(nucleus);GO:0005654(nucleoplasm);GO:0005737(cytoplasm);GO:0005739(mitochondrion);GO:0005829(cytosol);GO:00…	00010(Glycolysis / Gluconeogenesis);00052(Galactose metabolism);00500(Starch and sucrose metabolism);00520(Amino sugar and nucleotide sugar metabolism);00524(Neomycin, kanamycin and gentamicin biosynthesis);04910(Insulin signaling pathway);04911(Insulin secretion);04917(Prolactin signaling pathway);04922(Glucagon signaling pathway);04930(Type II diabetes mellitus);04950(Maturity onset diabetes of…	K12407	EC:2.7.1.2	glucokinase [Source:MGI Symbol;Acc:MGI:1270854]	protein_coding	R_MMU_71387(Metabolism_of_carbohydrates);R_MMU_1430728(Metabolism);R_MMU_70326(Glucose_metabolism);R_MMU_170822(Regulation_of_Glucokinase_by_Glucokinase_Regulatory_Protein);R_MMU_70171(Glycolysis)	0.344213	0.881989	0.390269	-1.35746	7.34327e-07	9.18662e-06	down	yes
ENSMUSG00000019851	Perp	16584	ENSMUST00000019998	GO:0002934(desmosome organization);GO:0005739(mitochondrion);GO:0005794(Golgi apparatus);GO:0005886(plasma membrane);GO:0005887(integral component of plasma membrane);GO:0005911(cell-cell junction);GO:0006915(apoptotic process);GO:0007155(cell adhesion);GO:0007219(Notch signaling pathway);GO:0016020(membrane);GO:0016021(integral component of membrane);GO:0030054(cell junction);GO:0030057(desmosom…	04115(p53 signaling pathway)	K10136	NA	PERP, TP53 apoptosis effector [Source:MGI Symbol;Acc:MGI:1929938]	protein_coding	R_MMU_6805567(Keratinization);R_MMU_6809371(Formation_of_the_cornified_envelope);R_MMU_1266738(Developmental_Biology)	5.8279	14.9116	0.390831	-1.35538	8.21042e-11	2.26902e-09	down	yes
ENSMUSG00000024424	Ttc39c	65498;65493;65497;65494;65503;65501	ENSMUST00000234966;ENSMUST00000234974;ENSMUST00000141060;ENSMUST00000234255;ENSMUST00000143388;ENSMUST00000234848	GO:0005515(protein binding);GO:0005515(protein binding)	NA	NA	NA	tetratricopeptide repeat domain 39C [Source:MGI Symbol;Acc:MGI:1919997]	protein_coding;nonsense_mediated_decay;retained_intron	NA	0.823243	2.10615	0.390875	-1.35522	3.80783e-10	9.15206e-09	down	yes
ENSMUSG00000085315	A430018G15Rik	76305;76304	ENSMUST00000143821;ENSMUST00000124210	NA	NA	NA	NA	RIKEN cDNA A430018G15 gene [Source:MGI Symbol;Acc:MGI:3040796]	processed_transcript	NA	0.637504	1.63041	0.391009	-1.35473	6.62284e-07	8.42486e-06	down	yes
ENSMUSG00000003354	Ccdc65	52581	ENSMUST00000003444	GO:0003352(regulation of cilium movement);GO:0003674(molecular_function);GO:0005737(cytoplasm);GO:0005856(cytoskeleton);GO:0005858(axonemal dynein complex);GO:0005929(cilium);GO:0005930(axoneme);GO:0031514(motile cilium);GO:0036064(ciliary basal body);GO:0042995(cell projection);GO:0060271(cilium assembly);GO:0060285(cilium-dependent cell motility);GO:0070286(axonemal dynein complex assembly)	NA	NA	NA	coiled-coil domain containing 65 [Source:MGI Symbol;Acc:MGI:2146001]	protein_coding	NA	2.43573	6.21685	0.391795	-1.35183	7.52643e-10	1.72282e-08	down	yes
ENSMUSG00000063558	Aox1	9435;9434	ENSMUST00000160168;ENSMUST00000001027	GO:0004031(aldehyde oxidase activity);GO:0005506(iron ion binding);GO:0005737(cytoplasm);GO:0005829(cytosol);GO:0009055(electron transfer activity);GO:0016491(oxidoreductase activity);GO:0017144(drug metabolic process);GO:0022900(electron transport chain);GO:0042802(identical protein binding);GO:0042803(protein homodimerization activity);GO:0043546(molybdopterin cofactor binding);GO:0046872(metal…	00280(Valine, leucine and isoleucine degradation);00350(Tyrosine metabolism);00380(Tryptophan metabolism);00750(Vitamin B6 metabolism);00760(Nicotinate and nicotinamide metabolism);00830(Retinol metabolism);00982(Drug metabolism - cytochrome P450);04630(Jak-STAT signaling pathway);04630(Jak-STAT signaling pathway)	K00157	EC:1.2.3.1	aldehyde oxidase 1 [Source:MGI Symbol;Acc:MGI:88035]	retained_intron;protein_coding	R_MMU_196854(Metabolism_of_vitamins_and_cofactors);R_MMU_1430728(Metabolism);R_MMU_196849(Metabolism_of_water_soluble_vitamins_and_cofactors);R_MMU_964975(Vitamins_B6_activation_to_pyridoxal_phosphate)	4.26167	10.8725	0.391967	-1.3512	2.46223e-11	7.38343e-10	down	yes
ENSMUSG00000047230	Cldn2	4106	ENSMUST00000054889	GO:0005198(structural molecule activity);GO:0005515(protein binding);GO:0005886(plasma membrane);GO:0005911(cell-cell junction);GO:0005923(bicellular tight junction);GO:0007155(cell adhesion);GO:0016020(membrane);GO:0016021(integral component of membrane);GO:0016338(calcium-independent cell-cell adhesion via plasma membrane cell-adhesion molecules);GO:0030054(cell junction);GO:0042802(identical p…	04514(Cell adhesion molecules (CAMs));04530(Tight junction);04670(Leukocyte transendothelial migration);05160(Hepatitis C)	K06087	NA	claudin 2 [Source:MGI Symbol;Acc:MGI:1276110]	protein_coding	NA	0.430449	1.09559	0.392894	-1.34779	2.21121e-07	3.12624e-06	down	yes
ENSMUSG00000086141	9030622O22Rik	81363;81365;81364	ENSMUST00000129082;ENSMUST00000132070;ENSMUST00000136555	NA	NA	NA	NA	RIKEN cDNA 9030622O22 gene [Source:MGI Symbol;Acc:MGI:1918820]	lincRNA	NA	1.50934	3.83448	0.393624	-1.34511	1.02234e-08	1.88794e-07	down	yes
ENSMUSG00000069170	Adgrv1	40973;40987;40983;40985;40982	ENSMUST00000095585;ENSMUST00000132045;ENSMUST00000125663;ENSMUST00000128585;ENSMUST00000146141	GO:0001917(photoreceptor inner segment);GO:0001965(G-protein alpha-subunit binding);GO:0002141(stereocilia ankle link);GO:0002142(stereocilia ankle link complex);GO:0004888(transmembrane signaling receptor activity);GO:0004930(G protein-coupled receptor activity);GO:0005509(calcium ion binding);GO:0005515(protein binding);GO:0005576(extracellular region);GO:0005737(cytoplasm);GO:0005886(plasma me…	NA	K18263	NA	adhesion G protein-coupled receptor V1 [Source:MGI Symbol;Acc:MGI:1274784]	protein_coding;retained_intron	NA	0.0852498	0.216576	0.393625	-1.3451	3.19192e-08	5.31306e-07	down	yes
ENSMUSG00000024653	Scgb1a1	70124	ENSMUST00000025554	GO:0000122(negative regulation of transcription by RNA polymerase II);GO:0005576(extracellular region);GO:0005615(extracellular space);GO:0005635(nuclear envelope);GO:0005737(cytoplasm);GO:0005783(endoplasmic reticulum);GO:0005791(rough endoplasmic reticulum);GO:0007165(signal transduction);GO:0009410(response to xenobiotic stimulus);GO:0010033(response to organic substance);GO:0010193(response t…	NA	NA	NA	secretoglobin, family 1A, member 1 (uteroglobin) [Source:MGI Symbol;Acc:MGI:98919]	protein_coding	NA	32806.9	83333	0.393684	-1.34489	1.7667e-11	5.36879e-10	down	yes
ENSMUSG00000020810	Cygb	30624	ENSMUST00000021166	GO:0001666(response to hypoxia);GO:0004096(catalase activity);GO:0004601(peroxidase activity);GO:0005344(oxygen carrier activity);GO:0005506(iron ion binding);GO:0005737(cytoplasm);GO:0006979(response to oxidative stress);GO:0010764(negative regulation of fibroblast migration);GO:0015671(oxygen transport);GO:0019395(fatty acid oxidation);GO:0019825(oxygen binding);GO:0020037(heme binding);GO:0032…	NA	K21894	NA	cytoglobin [Source:MGI Symbol;Acc:MGI:2149481]	protein_coding	R_MMU_8981607(Intracellular_oxygen_transport);R_MMU_1430728(Metabolism);R_MMU_382551(Transport_of_small_molecules);R_MMU_203615(eNOS_activation);R_MMU_202131(Metabolism_of_nitric_oxide:_NOS3_activation_and_regulation)	2.36664	6.00317	0.394232	-1.34288	5.96042e-10	1.407e-08	down	yes
ENSMUSG00000107622	4930512J16Rik	112016	ENSMUST00000203704	NA	NA	NA	NA	RIKEN cDNA 4930512J16 gene [Source:MGI Symbol;Acc:MGI:1922381]	lincRNA	NA	0.503923	1.27478	0.395302	-1.33897	2.11345e-06	2.32494e-05	down	yes
ENSMUSG00000028391	Wdr31	93080;93081;93084;93085;93083;93082;93086	ENSMUST00000146108;ENSMUST00000120095;ENSMUST00000107452;ENSMUST00000153615;ENSMUST00000030087;ENSMUST00000132263;ENSMUST00000149281	GO:0003674(molecular_function);GO:0005515(protein binding);GO:0005575(cellular_component);GO:0008150(biological_process);GO:0008150(biological_process)	NA	NA	NA	WD repeat domain 31 [Source:MGI Symbol;Acc:MGI:1918604]	processed_transcript;protein_coding;retained_intron	NA	0.746438	1.88452	0.39609	-1.3361	3.9213e-09	8.02627e-08	down	yes
ENSMUSG00000073424	Cyp4f15	61201;61199;61198	ENSMUST00000008801;ENSMUST00000167789;ENSMUST00000168171	GO:0004497(monooxygenase activity);GO:0005506(iron ion binding);GO:0008391(arachidonic acid monooxygenase activity);GO:0016491(oxidoreductase activity);GO:0016705(oxidoreductase activity, acting on paired donors, with incorporation or reduction of molecular oxygen);GO:0019369(arachidonic acid metabolic process);GO:0020037(heme binding);GO:0036101(leukotriene B4 catabolic process);GO:0042361(menaq…	NA	K00490	EC:1.14.14.1	cytochrome P450, family 4, subfamily f, polypeptide 15 [Source:MGI Symbol;Acc:MGI:2146921]	protein_coding;retained_intron	R_MMU_211897(Cytochrome_P450_arranged_by_substrate_type);R_MMU_556833(Metabolism_of_lipids);R_MMU_1430728(Metabolism);R_MMU_8978868(Fatty_acid_metabolism);R_MMU_211945(Phase_I_Functionalization_of_compounds);R_MMU_211958(Miscellaneous_substrates);R_MMU_211859(Biological_oxidations);R_MMU_2142753(Arachidonic_acid_metabolism);R_MMU_2142691(Synthesis_of_Leukotrienes_(LT)_and_Eoxins_(EX));R_MMU_21428…	1.71775	4.3359	0.396169	-1.33581	2.50789e-09	5.29025e-08	down	yes
ENSMUSG00000079559	Colca2	137430;137429	ENSMUST00000215038;ENSMUST00000114427	GO:0003674(molecular_function);GO:0005737(cytoplasm);GO:0008150(biological_process);GO:0008150(biological_process)	NA	NA	NA	COLCA2 homolog [Source:MGI Symbol;Acc:MGI:2685530]	protein_coding	NA	1.85331	4.66297	0.397453	-1.33115	1.5292e-08	2.74719e-07	down	yes
ENSMUSG00000046585	Cfap58	72476;72475	ENSMUST00000066308;ENSMUST00000238163	GO:0003674(molecular_function);GO:0005856(cytoskeleton);GO:0005929(cilium);GO:0008150(biological_process);GO:0042995(cell projection);GO:0042995(cell projection)	NA	NA	NA	cilia and flagella associated protein 58 [Source:MGI Symbol;Acc:MGI:2685815]	protein_coding	NA	1.49331	3.7495	0.398271	-1.32818	1.04871e-09	2.35632e-08	down	yes
ENSMUSG00000038991	Txndc5	38545;38547;38548;38546	ENSMUST00000035988;ENSMUST00000162075;ENSMUST00000160046;ENSMUST00000160653	GO:0003756(protein disulfide isomerase activity);GO:0005783(endoplasmic reticulum);GO:0005788(endoplasmic reticulum lumen);GO:0043277(apoptotic cell clearance);GO:0045454(cell redox homeostasis);GO:0045454(cell redox homeostasis)	04141(Protein processing in endoplasmic reticulum);04141(Protein processing in endoplasmic reticulum)	NA	NA	thioredoxin domain containing 5 [Source:MGI Symbol;Acc:MGI:2145316]	protein_coding;retained_intron	R_MMU_432720(Lysosome_Vesicle_Biogenesis);R_MMU_5653656(Vesicle_mediated_transport);R_MMU_432722(Golgi_Associated_Vesicle_Biogenesis);R_MMU_168256(Immune_System);R_MMU_199991(Membrane_Trafficking);R_MMU_199992(trans_Golgi_Network_Vesicle_Budding);R_MMU_6798695(Neutrophil_degranulation);R_MMU_168249(Innate_Immune_System)	30.6405	76.7788	0.399075	-1.32527	3.78146e-11	1.1047e-09	down	yes
ENSMUSG00000038167	Plekhg6	114062	ENSMUST00000042647	GO:0005085(guanyl-nucleotide exchange factor activity);GO:0005096(GTPase activator activity);GO:0005737(cytoplasm);GO:0005813(centrosome);GO:0005819(spindle);GO:0005856(cytoskeleton);GO:0005902(microvillus);GO:0008150(biological_process);GO:0030054(cell junction);GO:0032154(cleavage furrow);GO:0042995(cell projection);GO:0043547(positive regulation of GTPase activity)	NA	NA	NA	pleckstrin homology domain containing, family G (with RhoGef domain) member 6 [Source:MGI Symbol;Acc:MGI:2682298]	protein_coding	R_MMU_8980692(RHOA_GTPase_cycle);R_MMU_9012999(RHO_GTPase_cycle);R_MMU_9716542(Signaling_by_Rho_GTPases,_Miro_GTPases_and_RHOBTB3);R_MMU_194315(Signaling_by_Rho_GTPases);R_MMU_162582(Signal_Transduction);R_MMU_9013149(RAC1_GTPase_cycle)	0.309115	0.774125	0.399309	-1.32442	1.82021e-06	2.02624e-05	down	yes
ENSMUSG00000038570	Saxo2	122585;122589;122586;122588;122587	ENSMUST00000056728;ENSMUST00000126478;ENSMUST00000207693;ENSMUST00000151632;ENSMUST00000156720	GO:0005634(nucleus);GO:0005814(centriole);GO:0005856(cytoskeleton);GO:0005879(axonemal microtubule);GO:0008017(microtubule binding);GO:0031514(motile cilium);GO:0034453(microtubule anchoring);GO:0036064(ciliary basal body);GO:0036126(sperm flagellum);GO:0036126(sperm flagellum)	NA	NA	NA	stabilizer of axonemal microtubules 2 [Source:MGI Symbol;Acc:MGI:1914618]	protein_coding;retained_intron	NA	4.3907	10.9917	0.399455	-1.3239	8.68451e-11	2.37991e-09	down	yes
ENSMUSG00000049086	Bmyc	74345	ENSMUST00000061483	GO:0000122(negative regulation of transcription by RNA polymerase II);GO:0000978(RNA polymerase II cis-regulatory region sequence-specific DNA binding);GO:0001228(DNA-binding transcription activator activity, RNA polymerase II-specific);GO:0003700(DNA-binding transcription factor activity);GO:0005515(protein binding);GO:0005634(nucleus);GO:0005819(spindle);GO:0006355(regulation of transcription, …	NA	K09111	NA	brain expressed myelocytomatosis oncogene [Source:MGI Symbol;Acc:MGI:88184]	protein_coding	NA	3.58766	8.98105	0.39947	-1.32384	4.72953e-09	9.52088e-08	down	yes
ENSMUSG00000038963	Slco4a1	83633;83631;83635;83634	ENSMUST00000038225;ENSMUST00000038259;ENSMUST00000128367;ENSMUST00000138446	GO:0005515(protein binding);GO:0005886(plasma membrane);GO:0005887(integral component of plasma membrane);GO:0006811(ion transport);GO:0015347(sodium-independent organic anion transmembrane transporter activity);GO:0015349(thyroid hormone transmembrane transporter activity);GO:0016020(membrane);GO:0016021(integral component of membrane);GO:0022857(transmembrane transporter activity);GO:0042403(th…	NA	K14354	NA	solute carrier organic anion transporter family, member 4a1 [Source:MGI Symbol;Acc:MGI:1351866]	protein_coding;retained_intron	R_MMU_425407(SLC_mediated_transmembrane_transport);R_MMU_382551(Transport_of_small_molecules);R_MMU_879518(Transport_of_organic_anions);R_MMU_425397(Transport_of_vitamins,_nucleosides,_and_related_molecules)	0.283676	0.709898	0.399602	-1.32337	5.02835e-07	6.4941e-06	down	yes
ENSMUSG00000095642	Ighv14-3	36399	ENSMUST00000103469	GO:0003823(antigen binding);GO:0006910(phagocytosis, recognition);GO:0006911(phagocytosis, engulfment);GO:0006958(complement activation, classical pathway);GO:0009897(external side of plasma membrane);GO:0034987(immunoglobulin receptor binding);GO:0042571(immunoglobulin complex, circulating);GO:0042742(defense response to bacterium);GO:0045087(innate immune response);GO:0050853(B cell receptor si…	NA	NA	NA	immunoglobulin heavy variable V14-3 [Source:MGI Symbol;Acc:MGI:4439764]	IG_V_gene	R_MMU_2871809(FCERI_mediated_Ca+2_mobilization);R_MMU_977606(Regulation_of_Complement_cascade);R_MMU_5653656(Vesicle_mediated_transport);R_MMU_2029481(FCGR_activation);R_MMU_2029480(Fcgamma_receptor_(FCGR)_dependent_phagocytosis);R_MMU_983705(Signaling_by_the_B_Cell_Receptor_(BCR));R_MMU_109582(Hemostasis);R_MMU_173623(Classical_antibody_mediated_complement_activation);R_MMU_166663(Initial_trigge…	76.0217	190.243	0.399603	-1.32336	6.52257e-11	1.83453e-09	down	yes
ENSMUSG00000037280	Galnt6	52941;52940	ENSMUST00000052069;ENSMUST00000159715	GO:0000139(Golgi membrane);GO:0004653(polypeptide N-acetylgalactosaminyltransferase activity);GO:0005794(Golgi apparatus);GO:0006486(protein glycosylation);GO:0016020(membrane);GO:0016021(integral component of membrane);GO:0016740(transferase activity);GO:0016757(transferase activity, transferring glycosyl groups);GO:0030246(carbohydrate binding);GO:0046872(metal ion binding);GO:0048471(perinucle…	00512(Mucin type O-glycan biosynthesis);00512(Mucin type O-glycan biosynthesis)	K00710	EC:2.4.1.41	polypeptide N-acetylgalactosaminyltransferase 6 [Source:MGI Symbol;Acc:MGI:1891640]	protein_coding	R_MMU_913709(O_linked_glycosylation_of_mucins);R_MMU_5173105(O_linked_glycosylation);R_MMU_597592(Post_translational_protein_modification);R_MMU_392499(Metabolism_of_proteins)	1.85845	4.64935	0.399723	-1.32293	5.25029e-10	1.24865e-08	down	yes
ENSMUSG00000015957	Wnt11	123361;123362;123363;123359;123364;123360	ENSMUST00000067495;ENSMUST00000167303;ENSMUST00000165240;ENSMUST00000165122;ENSMUST00000208062;ENSMUST00000163913	GO:0001649(osteoblast differentiation);GO:0001822(kidney development);GO:0001837(epithelial to mesenchymal transition);GO:0003138(primary heart field specification);GO:0003139(secondary heart field specification);GO:0003151(outflow tract morphogenesis);GO:0003281(ventricular septum development);GO:0003283(atrial septum development);GO:0003402(planar cell polarity pathway involved in axis elongati…	04150(mTOR signaling pathway);04310(Wnt signaling pathway);04390(Hippo signaling pathway);04550(Signaling pathways regulating pluripotency of stem cells);04916(Melanogenesis);04934(Cushing syndrome);05165(Human papillomavirus infection);05200(Pathways in cancer);05205(Proteoglycans in cancer);05217(Basal cell carcinoma);05224(Breast cancer);05225(Hepatocellular carcinoma);05226(Gastric cancer);05…	NA	NA	wingless-type MMTV integration site family, member 11 [Source:MGI Symbol;Acc:MGI:101948]	protein_coding;nonsense_mediated_decay;processed_transcript	R_MMU_3858494(Beta_catenin_independent_WNT_signaling);R_MMU_195721(Signaling_by_WNT);R_MMU_4086398(Ca2+_pathway);R_MMU_3238698(WNT_ligand_biogenesis_and_trafficking);R_MMU_162582(Signal_Transduction);R_MMU_4086400(PCP/CE_pathway)	1.58347	3.95988	0.399878	-1.32237	7.31364e-10	1.68383e-08	down	yes
ENSMUSG00000007034	Slc44a4	61862;61861	ENSMUST00000007249;ENSMUST00000173664	GO:0005886(plasma membrane);GO:0008292(acetylcholine biosynthetic process);GO:0015220(choline transmembrane transporter activity);GO:0015871(choline transport);GO:0016020(membrane);GO:0016021(integral component of membrane);GO:0016324(apical plasma membrane);GO:0022857(transmembrane transporter activity);GO:0030307(positive regulation of cell growth);GO:0030974(thiamine pyrophosphate transmembran…	05231(Choline metabolism in cancer);05231(Choline metabolism in cancer)	K15377	NA	solute carrier family 44, member 4 [Source:MGI Symbol;Acc:MGI:1917379]	protein_coding;retained_intron	R_MMU_556833(Metabolism_of_lipids);R_MMU_1430728(Metabolism);R_MMU_1483257(Phospholipid_metabolism);R_MMU_425407(SLC_mediated_transmembrane_transport);R_MMU_382551(Transport_of_small_molecules);R_MMU_1483191(Synthesis_of_PC);R_MMU_425366(Transport_of_bile_salts_and_organic_acids,_metal_ions_and_amine_compounds);R_MMU_1483206(Glycerophospholipid_biosynthesis)	4.52695	11.3177	0.399988	-1.32197	1.36604e-10	3.61157e-09	down	yes
ENSMUSG00000076621	Ighj1	36312	ENSMUST00000103430	NA	NA	NA	NA	immunoglobulin heavy joining 1 [Source:MGI Symbol;Acc:MGI:4439802]	IG_J_gene	NA	87.9637	219.529	0.400693	-1.31943	1.97397e-09	4.25449e-08	down	yes
ENSMUSG00000092395	Gm20463	61723	ENSMUST00000174756	NA	NA	NA	NA	predicted gene 20463 [Source:MGI Symbol;Acc:MGI:5141928]	antisense	NA	3.11646	7.7775	0.400702	-1.3194	1.07526e-06	1.27385e-05	down	yes
ENSMUSG00000028294	Cfap206	91671;91674;91675;91676;91673	ENSMUST00000029971;ENSMUST00000162495;ENSMUST00000137514;ENSMUST00000160209;ENSMUST00000108136	GO:0001534(radial spoke);GO:0003341(cilium movement);GO:0003674(molecular_function);GO:0005575(cellular_component);GO:0005737(cytoplasm);GO:0005856(cytoskeleton);GO:0005929(cilium);GO:0008150(biological_process);GO:0030030(cell projection organization);GO:0031514(motile cilium);GO:0035082(axoneme assembly);GO:0042995(cell projection);GO:0097649(A axonemal microtubule);GO:0097649(A axonemal microt…	NA	NA	NA	cilia and flagella associated protein 206 [Source:MGI Symbol;Acc:MGI:1916579]	protein_coding;nonsense_mediated_decay;processed_transcript	NA	6.23357	15.5552	0.40074	-1.31926	1.34626e-10	3.56523e-09	down	yes
ENSMUSG00000035860	Cdhr3	32540;32542;32543;32541	ENSMUST00000095774;ENSMUST00000219158;ENSMUST00000219065;ENSMUST00000219453	GO:0005509(calcium ion binding);GO:0005886(plasma membrane);GO:0005887(integral component of plasma membrane);GO:0007155(cell adhesion);GO:0007156(homophilic cell adhesion via plasma membrane adhesion molecules);GO:0016020(membrane);GO:0016021(integral component of membrane);GO:0016021(integral component of membrane)	NA	K16503	NA	cadherin-related family member 3 [Source:MGI Symbol;Acc:MGI:1916014]	protein_coding;processed_transcript;retained_intron	NA	6.9669	17.3593	0.401336	-1.31712	7.82046e-11	2.17261e-09	down	yes
ENSMUSG00000028600	Podn	94405;94404;94401;94407;94403	ENSMUST00000145491;ENSMUST00000106708;ENSMUST00000106709;ENSMUST00000147597;ENSMUST00000044248	GO:0005515(protein binding);GO:0005518(collagen binding);GO:0005576(extracellular region);GO:0005615(extracellular space);GO:0005737(cytoplasm);GO:0008285(negative regulation of cell population proliferation);GO:0030336(negative regulation of cell migration);GO:0030336(negative regulation of cell migration)	NA	NA	NA	podocan [Source:MGI Symbol;Acc:MGI:2674939]	processed_transcript;protein_coding	NA	1.11135	2.76715	0.401621	-1.31609	2.24612e-09	4.80191e-08	down	yes
ENSMUSG00000074063	Osgin1	133700;133701;133699;133704	ENSMUST00000152420;ENSMUST00000126414;ENSMUST00000131448;ENSMUST00000145604	GO:0005575(cellular_component);GO:0007165(signal transduction);GO:0008083(growth factor activity);GO:0030154(cell differentiation);GO:0030308(negative regulation of cell growth);GO:0030334(regulation of cell migration);GO:0040008(regulation of growth);GO:0042127(regulation of cell population proliferation);GO:0042981(regulation of apoptotic process);GO:0043065(positive regulation of apoptotic pro…	NA	NA	NA	oxidative stress induced growth inhibitor 1 [Source:MGI Symbol;Acc:MGI:1919089]	protein_coding;processed_transcript;retained_intron	NA	2.19864	5.47224	0.40178	-1.31552	1.0792e-09	2.41458e-08	down	yes
ENSMUSG00000039632	Ccdc151	135418;135419;135420	ENSMUST00000115336;ENSMUST00000044926;ENSMUST00000214420	GO:0003341(cilium movement);GO:0005929(cilium);GO:0005930(axoneme);GO:0007368(determination of left/right symmetry);GO:0036158(outer dynein arm assembly);GO:0070286(axonemal dynein complex assembly);GO:0070286(axonemal dynein complex assembly)	NA	NA	NA	coiled-coil domain containing 151 [Source:MGI Symbol;Acc:MGI:1924859]	protein_coding;retained_intron	NA	2.23582	5.55991	0.402133	-1.31425	1.35725e-09	3.01119e-08	down	yes
ENSMUSG00000057068	Fam47e	102724;102720;102725;102721;102722;102726	ENSMUST00000131166;ENSMUST00000146417;ENSMUST00000176448;ENSMUST00000149617;ENSMUST00000176621;ENSMUST00000082382	GO:0003674(molecular_function);GO:0005737(cytoplasm);GO:0008150(biological_process);GO:0008150(biological_process)	NA	NA	NA	family with sequence similarity 47, member E [Source:MGI Symbol;Acc:MGI:2686227]	protein_coding;nonsense_mediated_decay	NA	3.33573	8.2822	0.402758	-1.31201	9.4975e-10	2.14309e-08	down	yes
ENSMUSG00000039783	Kmo	14990;14993;14991;14989	ENSMUST00000040250;ENSMUST00000097458;ENSMUST00000142223;ENSMUST00000140474	GO:0004497(monooxygenase activity);GO:0004502(kynurenine 3-monooxygenase activity);GO:0005615(extracellular space);GO:0005739(mitochondrion);GO:0005741(mitochondrial outer membrane);GO:0005743(mitochondrial inner membrane);GO:0006569(tryptophan catabolic process);GO:0007568(aging);GO:0009435(NAD biosynthetic process);GO:0009651(response to salt stress);GO:0014049(positive regulation of glutamate …	00380(Tryptophan metabolism);00380(Tryptophan metabolism)	K00486	EC:1.14.13.9	kynurenine 3-monooxygenase (kynurenine 3-hydroxylase) [Source:MGI Symbol;Acc:MGI:2138151]	protein_coding;retained_intron;nonsense_mediated_decay	R_MMU_71240(Tryptophan_catabolism);R_MMU_1430728(Metabolism);R_MMU_71291(Metabolism_of_amino_acids_and_derivatives)	0.743	1.8443	0.402863	-1.31164	7.99014e-09	1.52341e-07	down	yes
ENSMUSG00000027313	Chac1	79734	ENSMUST00000028780	GO:0003839(gamma-glutamylcyclotransferase activity);GO:0005112(Notch binding);GO:0005737(cytoplasm);GO:0005794(Golgi apparatus);GO:0005802(trans-Golgi network);GO:0005829(cytosol);GO:0006751(glutathione catabolic process);GO:0006915(apoptotic process);GO:0006986(response to unfolded protein);GO:0007219(Notch signaling pathway);GO:0007399(nervous system development);GO:0010955(negative regulation …	00480(Glutathione metabolism)	K07232	EC:4.3.2.7	ChaC, cation transport regulator 1 [Source:MGI Symbol;Acc:MGI:1916315]	protein_coding	R_MMU_1430728(Metabolism);R_MMU_156590(Glutathione_conjugation);R_MMU_156580(Phase_II_Conjugation_of_compounds);R_MMU_174403(Glutathione_synthesis_and_recycling);R_MMU_211859(Biological_oxidations)	1.28321	3.18013	0.403508	-1.30933	6.38664e-08	1.00507e-06	down	yes
ENSMUSG00000042788	Fam166b	92138;92141;92139;92140	ENSMUST00000052829;ENSMUST00000107929;ENSMUST00000171134;ENSMUST00000155080	GO:0003674(molecular_function);GO:0005575(cellular_component);GO:0008150(biological_process);GO:0008150(biological_process)	NA	NA	NA	family with sequence similarity 166, member B [Source:MGI Symbol;Acc:MGI:2445194]	protein_coding	NA	6.15536	15.2477	0.403692	-1.30867	6.11771e-10	1.43984e-08	down	yes
ENSMUSG00000095863	Ighv1-67	36567;36568	ENSMUST00000103538;ENSMUST00000198646	GO:0003823(antigen binding);GO:0006910(phagocytosis, recognition);GO:0006911(phagocytosis, engulfment);GO:0006958(complement activation, classical pathway);GO:0009897(external side of plasma membrane);GO:0034987(immunoglobulin receptor binding);GO:0042571(immunoglobulin complex, circulating);GO:0042742(defense response to bacterium);GO:0045087(innate immune response);GO:0050853(B cell receptor si…	NA	NA	NA	immunoglobulin heavy variable V1-67 [Source:MGI Symbol;Acc:MGI:3645228]	IG_V_gene	R_MMU_2871809(FCERI_mediated_Ca+2_mobilization);R_MMU_977606(Regulation_of_Complement_cascade);R_MMU_5653656(Vesicle_mediated_transport);R_MMU_2029481(FCGR_activation);R_MMU_2029480(Fcgamma_receptor_(FCGR)_dependent_phagocytosis);R_MMU_983705(Signaling_by_the_B_Cell_Receptor_(BCR));R_MMU_109582(Hemostasis);R_MMU_173623(Classical_antibody_mediated_complement_activation);R_MMU_166663(Initial_trigge…	52.6382	130.336	0.403867	-1.30805	1.54448e-10	4.04292e-09	down	yes
ENSMUSG00000076608	Igkj5	110775;110776	ENSMUST00000199459;ENSMUST00000103409	NA	NA	NA	NA	immunoglobulin kappa joining 5 [Source:MGI Symbol;Acc:MGI:1316738]	IG_J_gene;processed_transcript	NA	1119.2	2770.46	0.403975	-1.30766	8.57483e-11	2.35741e-09	down	yes
ENSMUSG00000039316	Rftn1	63351;63353;63352	ENSMUST00000044503;ENSMUST00000156094;ENSMUST00000113195	GO:0001765(membrane raft assembly);GO:0002457(T cell antigen processing and presentation);GO:0003725(double-stranded RNA binding);GO:0005737(cytoplasm);GO:0005768(endosome);GO:0005769(early endosome);GO:0005886(plasma membrane);GO:0016020(membrane);GO:0032596(protein transport into membrane raft);GO:0032620(interleukin-17 production);GO:0032991(protein-containing complex);GO:0033227(dsRNA transpo…	NA	NA	NA	raftlin lipid raft linker 1 [Source:MGI Symbol;Acc:MGI:1923688]	protein_coding;retained_intron	NA	3.5066	8.67943	0.404013	-1.30753	1.86029e-10	4.73673e-09	down	yes
ENSMUSG00000075225	Ccdc162	17490;17492;17487;17491;17488;17494;17499	ENSMUST00000189488;ENSMUST00000160002;ENSMUST00000159978;ENSMUST00000095227;ENSMUST00000219054;ENSMUST00000159868;ENSMUST00000187853	GO:0003674(molecular_function);GO:0005575(cellular_component);GO:0008150(biological_process);GO:0008150(biological_process)	NA	NA	NA	coiled-coil domain containing 162 [Source:MGI Symbol;Acc:MGI:1923223]	protein_coding;retained_intron;processed_transcript	NA	1.79272	4.43084	0.404601	-1.30543	1.80897e-10	4.62088e-09	down	yes
ENSMUSG00000051506	Wdfy4	44165;44164;44172;44173	ENSMUST00000130509;ENSMUST00000061753;ENSMUST00000132153;ENSMUST00000159606	GO:0005515(protein binding);GO:0005768(endosome);GO:0005769(early endosome);GO:0005783(endoplasmic reticulum);GO:0006914(autophagy);GO:0019882(antigen processing and presentation);GO:0036037(CD8-positive, alpha-beta T cell activation);GO:0098586(cellular response to virus);GO:0098586(cellular response to virus)	NA	NA	NA	WD repeat and FYVE domain containing 4 [Source:MGI Symbol;Acc:MGI:3584510]	protein_coding	NA	1.32056	3.26072	0.404989	-1.30405	2.46193e-10	6.15986e-09	down	yes
ENSMUSG00000110332	Gm19935	132198	ENSMUST00000209208	NA	NA	NA	NA	predicted gene, 19935 [Source:MGI Symbol;Acc:MGI:5012120]	protein_coding	NA	33.5282	82.677	0.405532	-1.30211	1.19329e-10	3.1975e-09	down	yes
ENSMUSG00000099032	Tcf24	7671;7672	ENSMUST00000185184;ENSMUST00000097824	GO:0000977(RNA polymerase II regulatory region sequence-specific DNA binding);GO:0000981(DNA-binding transcription factor activity, RNA polymerase II-specific);GO:0005634(nucleus);GO:0006357(regulation of transcription by RNA polymerase II);GO:0032502(developmental process);GO:0046983(protein dimerization activity);GO:0046983(protein dimerization activity)	NA	NA	NA	transcription factor 24 [Source:MGI Symbol;Acc:MGI:3780500]	protein_coding	NA	0.345591	0.852183	0.405536	-1.3021	4.73536e-07	6.16724e-06	down	yes
ENSMUSG00000030029	Lrig1	112360;112359;112358;112365	ENSMUST00000101126;ENSMUST00000032105;ENSMUST00000204645;ENSMUST00000124165	GO:0005515(protein binding);GO:0005615(extracellular space);GO:0005886(plasma membrane);GO:0007605(sensory perception of sound);GO:0016020(membrane);GO:0016021(integral component of membrane);GO:0022405(hair cycle process);GO:0031012(extracellular matrix);GO:0032474(otolith morphogenesis);GO:0060384(innervation);GO:0060384(innervation)	NA	NA	NA	leucine-rich repeats and immunoglobulin-like domains 1 [Source:MGI Symbol;Acc:MGI:107935]	protein_coding;nonsense_mediated_decay;processed_transcript	R_MMU_177929(Signaling_by_EGFR);R_MMU_6807004(Negative_regulation_of_MET_activity);R_MMU_9006934(Signaling_by_Receptor_Tyrosine_Kinases);R_MMU_6806834(Signaling_by_MET);R_MMU_162582(Signal_Transduction)	3.48943	8.60109	0.405696	-1.30153	1.85006e-10	4.71825e-09	down	yes
ENSMUSG00000018796	Acsl1	130008;130018;130012;130011;130009;130017	ENSMUST00000034046;ENSMUST00000133161;ENSMUST00000135955;ENSMUST00000211289;ENSMUST00000128746;ENSMUST00000110371	GO:0000038(very long-chain fatty acid metabolic process);GO:0000166(nucleotide binding);GO:0001676(long-chain fatty acid metabolic process);GO:0003824(catalytic activity);GO:0003996(acyl-CoA ligase activity);GO:0004467(long-chain fatty acid-CoA ligase activity);GO:0005524(ATP binding);GO:0005739(mitochondrion);GO:0005741(mitochondrial outer membrane);GO:0005777(peroxisome);GO:0005778(peroxisomal …	00061(Fatty acid biosynthesis);00071(Fatty acid degradation);03320(PPAR signaling pathway);04146(Peroxisome);04216(Ferroptosis);04714(Thermogenesis);04920(Adipocytokine signaling pathway);04920(Adipocytokine signaling pathway)	NA	NA	acyl-CoA synthetase long-chain family member 1 [Source:MGI Symbol;Acc:MGI:102797]	protein_coding;retained_intron	R_MMU_556833(Metabolism_of_lipids);R_MMU_1430728(Metabolism);R_MMU_8978868(Fatty_acid_metabolism);R_MMU_75105(Fatty_acyl_CoA_biosynthesis);R_MMU_2046106(alpha_linolenic_acid_(ALA)_metabolism);R_MMU_75876(Synthesis_of_very_long_chain_fatty_acyl_CoAs);R_MMU_2046105(Linoleic_acid_(LA)_metabolism);R_MMU_2046104(alpha_linolenic_(omega3)_and_linoleic_(omega6)_acid_metabolism)	2.66976	6.58068	0.405697	-1.30153	1.41886e-10	3.73876e-09	down	yes
ENSMUSG00000021950	Anxa8	44227;44228	ENSMUST00000022519;ENSMUST00000120077	GO:0005509(calcium ion binding);GO:0005544(calcium-dependent phospholipid binding);GO:0005546(phosphatidylinositol-4,5-bisphosphate binding);GO:0005547(phosphatidylinositol-3,4,5-trisphosphate binding);GO:0005737(cytoplasm);GO:0005829(cytosol);GO:0005886(plasma membrane);GO:0007032(endosome organization);GO:0007596(blood coagulation);GO:0007599(hemostasis);GO:0016197(endosomal transport);GO:00319…	NA	K17096	NA	annexin A8 [Source:MGI Symbol;Acc:MGI:1201374]	protein_coding	NA	17.3511	42.7575	0.405803	-1.30115	1.23845e-10	3.30732e-09	down	yes
ENSMUSG00000100017	2410022M11Rik	46398	ENSMUST00000186474	NA	NA	NA	NA	RIKEN cDNA 2410022M11 gene [Source:MGI Symbol;Acc:MGI:1917005]	bidirectional_promoter_lncRNA	NA	0.769068	1.89471	0.405903	-1.30079	4.79629e-07	6.23125e-06	down	yes
ENSMUSG00000035539	Ccdc180	92456;92458;92455	ENSMUST00000178561;ENSMUST00000151024;ENSMUST00000127261	GO:0003674(molecular_function);GO:0008150(biological_process);GO:0008150(biological_process)	NA	NA	NA	coiled-coil domain containing 180 [Source:MGI Symbol;Acc:MGI:2685871]	protein_coding;retained_intron	NA	2.61899	6.45075	0.405998	-1.30045	2.6913e-10	6.66022e-09	down	yes
ENSMUSG00000028681	Ptch2	94983;94985;94988	ENSMUST00000030443;ENSMUST00000156989;ENSMUST00000123226	GO:0001558(regulation of cell growth);GO:0001709(cell fate determination);GO:0005119(smoothened binding);GO:0005886(plasma membrane);GO:0007224(smoothened signaling pathway);GO:0008158(hedgehog receptor activity);GO:0008544(epidermis development);GO:0009957(epidermal cell fate specification);GO:0016020(membrane);GO:0016021(integral component of membrane);GO:0042633(hair cycle);GO:0043588(skin dev…	04340(Hedgehog signaling pathway);05200(Pathways in cancer);05217(Basal cell carcinoma);05217(Basal cell carcinoma)	K11101	NA	patched 2 [Source:MGI Symbol;Acc:MGI:1095405]	protein_coding;retained_intron	NA	0.237474	0.584248	0.406461	-1.29881	5.9267e-07	7.58187e-06	down	yes
ENSMUSG00000054545	Ugt1a6a	11243;11244;11246	ENSMUST00000113134;ENSMUST00000124852;ENSMUST00000014263	GO:0005743(mitochondrial inner membrane);GO:0005783(endoplasmic reticulum);GO:0005789(endoplasmic reticulum membrane);GO:0008194(UDP-glycosyltransferase activity);GO:0015020(glucuronosyltransferase activity);GO:0016020(membrane);GO:0016021(integral component of membrane);GO:0016740(transferase activity);GO:0016757(transferase activity, transferring glycosyl groups);GO:0016758(transferase activity…	00040(Pentose and glucuronate interconversions);00053(Ascorbate and aldarate metabolism);00140(Steroid hormone biosynthesis);00830(Retinol metabolism);00860(Porphyrin and chlorophyll metabolism);00980(Metabolism of xenobiotics by cytochrome P450);00982(Drug metabolism - cytochrome P450);00983(Drug metabolism - other enzymes);05204(Chemical carcinogenesis);05204(Chemical carcinogenesis)	K00699	EC:2.4.1.17	UDP glucuronosyltransferase 1 family, polypeptide A6A [Source:MGI Symbol;Acc:MGI:2137698]	protein_coding;retained_intron	R_MMU_156588(Glucuronidation);R_MMU_1430728(Metabolism);R_MMU_156580(Phase_II_Conjugation_of_compounds);R_MMU_211859(Biological_oxidations)	3.28831	8.08426	0.406754	-1.29777	2.79147e-10	6.88663e-09	down	yes
ENSMUSG00000051378	Kif18b	29548	ENSMUST00000021311	GO:0000070(mitotic sister chromatid segregation);GO:0000166(nucleotide binding);GO:0000235(astral microtubule);GO:0000278(mitotic cell cycle);GO:0003774(motor activity);GO:0003777(microtubule motor activity);GO:0005524(ATP binding);GO:0005634(nucleus);GO:0005654(nucleoplasm);GO:0005737(cytoplasm);GO:0005829(cytosol);GO:0005856(cytoskeleton);GO:0005871(kinesin complex);GO:0005874(microtubule);GO:0…	NA	NA	NA	kinesin family member 18B [Source:MGI Symbol;Acc:MGI:2446979]	protein_coding	R_MMU_5653656(Vesicle_mediated_transport);R_MMU_109582(Hemostasis);R_MMU_6811434(COPI_dependent_Golgi_to_ER_retrograde_traffic);R_MMU_983231(Factors_involved_in_megakaryocyte_development_and_platelet_production);R_MMU_983189(Kinesins);R_MMU_168256(Immune_System);R_MMU_8856688(Golgi_to_ER_retrograde_transport);R_MMU_2132295(MHC_class_II_antigen_presentation);R_MMU_199991(Membrane_Trafficking);R_MM…	0.274727	0.675247	0.406855	-1.29741	4.6454e-06	4.66392e-05	down	yes
ENSMUSG00000079235	Ccdc13	142304;142307;142306	ENSMUST00000135986;ENSMUST00000142783;ENSMUST00000126851	GO:0003674(molecular_function);GO:0005654(nucleoplasm);GO:0005737(cytoplasm);GO:0005813(centrosome);GO:0005815(microtubule organizing center);GO:0005829(cytosol);GO:0005856(cytoskeleton);GO:0006974(cellular response to DNA damage stimulus);GO:0030030(cell projection organization);GO:0031122(cytoplasmic microtubule organization);GO:0034451(centriolar satellite);GO:0042995(cell projection);GO:19055…	NA	NA	NA	coiled-coil domain containing 13 [Source:MGI Symbol;Acc:MGI:1920144]	protein_coding;retained_intron	NA	0.557311	1.3686	0.407212	-1.29615	1.38023e-07	2.0424e-06	down	yes
ENSMUSG00000114245	Gm38655	59579	ENSMUST00000224277	GO:0007275(multicellular organism development);GO:0035883(enteroendocrine cell differentiation);GO:0048546(digestive tract morphogenesis)	NA	NA	NA	predicted gene, 38655 [Source:MGI Symbol;Acc:MGI:5621540]	protein_coding	NA	1.70748	4.18979	0.407534	-1.29501	5.15045e-07	6.63163e-06	down	yes
ENSMUSG00000032092	Mpzl2	136976;136977;136975;136973	ENSMUST00000034600;ENSMUST00000216777;ENSMUST00000215292;ENSMUST00000217097	GO:0016020(membrane);GO:0016021(integral component of membrane);GO:0098609(cell-cell adhesion);GO:0098609(cell-cell adhesion)	NA	NA	NA	myelin protein zero-like 2 [Source:MGI Symbol;Acc:MGI:1289160]	protein_coding;retained_intron	NA	0.762632	1.87129	0.407544	-1.29497	2.48773e-09	5.2547e-08	down	yes
ENSMUSG00000017002	Slpi	82639;82642;82640	ENSMUST00000109367;ENSMUST00000167427;ENSMUST00000165980	GO:0002376(immune system process);GO:0003677(DNA binding);GO:0003729(mRNA binding);GO:0004866(endopeptidase inhibitor activity);GO:0004867(serine-type endopeptidase inhibitor activity);GO:0005515(protein binding);GO:0005576(extracellular region);GO:0005615(extracellular space);GO:0005794(Golgi apparatus);GO:0006508(proteolysis);GO:0006955(immune response);GO:0008233(peptidase activity);GO:0010466…	NA	NA	NA	secretory leukocyte peptidase inhibitor [Source:MGI Symbol;Acc:MGI:109297]	protein_coding	R_MMU_168256(Immune_System);R_MMU_6798695(Neutrophil_degranulation);R_MMU_168249(Innate_Immune_System)	211.922	519.607	0.407851	-1.29389	9.41258e-11	2.56109e-09	down	yes
ENSMUSG00000022949	Clic6	57536	ENSMUST00000023670	GO:0005244(voltage-gated ion channel activity);GO:0005254(chloride channel activity);GO:0005515(protein binding);GO:0005737(cytoplasm);GO:0005886(plasma membrane);GO:0006811(ion transport);GO:0006821(chloride transport);GO:0008022(protein C-terminus binding);GO:0016020(membrane);GO:0016021(integral component of membrane);GO:0031749(D2 dopamine receptor binding);GO:0031750(D3 dopamine receptor bin…	NA	K05026	NA	chloride intracellular channel 6 [Source:MGI Symbol;Acc:MGI:2146607]	protein_coding	NA	7.50376	18.3912	0.408008	-1.29333	1.66989e-10	4.31607e-09	down	yes
ENSMUSG00000042254	Cilp	138389	ENSMUST00000048762	GO:0005576(extracellular region);GO:0005615(extracellular space);GO:0010629(negative regulation of gene expression);GO:0043569(negative regulation of insulin-like growth factor receptor signaling pathway);GO:0060392(negative regulation of SMAD protein signal transduction);GO:0062023(collagen-containing extracellular matrix);GO:0071560(cellular response to transforming growth factor beta stimulus)	NA	NA	NA	cartilage intermediate layer protein, nucleotide pyrophosphohydrolase [Source:MGI Symbol;Acc:MGI:2444507]	protein_coding	R_MMU_9006934(Signaling_by_Receptor_Tyrosine_Kinases);R_MMU_2404192(Signaling_by_Type_1_Insulin_like_Growth_Factor_1_Receptor_(IGF1R));R_MMU_162582(Signal_Transduction)	0.474345	1.16116	0.40851	-1.29156	1.14795e-07	1.71792e-06	down	yes
ENSMUSG00000021803	Cdhr1	44336	ENSMUST00000022337	GO:0005509(calcium ion binding);GO:0005515(protein binding);GO:0005886(plasma membrane);GO:0005887(integral component of plasma membrane);GO:0007155(cell adhesion);GO:0007156(homophilic cell adhesion via plasma membrane adhesion molecules);GO:0008594(photoreceptor cell morphogenesis);GO:0009987(cellular process);GO:0016020(membrane);GO:0016021(integral component of membrane);GO:0035845(photorecep…	NA	K16501	NA	cadherin-related family member 1 [Source:MGI Symbol;Acc:MGI:2157782]	protein_coding	NA	0.820841	2.00929	0.408524	-1.29151	1.04645e-08	1.92798e-07	down	yes
ENSMUSG00000074673	Ttll9	81689;81696;81691;81698;81692	ENSMUST00000099197;ENSMUST00000151641;ENSMUST00000146626;ENSMUST00000150218;ENSMUST00000103155	GO:0000166(nucleotide binding);GO:0000226(microtubule cytoskeleton organization);GO:0005524(ATP binding);GO:0005737(cytoplasm);GO:0005856(cytoskeleton);GO:0005874(microtubule);GO:0005929(cilium);GO:0006464(cellular protein modification process);GO:0015631(tubulin binding);GO:0016874(ligase activity);GO:0018095(protein polyglutamylation);GO:0030317(flagellated sperm motility);GO:0042995(cell proje…	NA	K16603	EC:6.-.-.-	tubulin tyrosine ligase-like family, member 9 [Source:MGI Symbol;Acc:MGI:1913589]	protein_coding;retained_intron;nonsense_mediated_decay	R_MMU_597592(Post_translational_protein_modification);R_MMU_392499(Metabolism_of_proteins);R_MMU_8955332(Carboxyterminal_post_translational_modifications_of_tubulin)	0.610383	1.49391	0.408581	-1.2913	1.09633e-07	1.64689e-06	down	yes
ENSMUSG00000060268	Armh1	95029;95030	ENSMUST00000165128;ENSMUST00000077500	GO:0003674(molecular_function);GO:0005575(cellular_component);GO:0008150(biological_process);GO:0008150(biological_process)	NA	NA	NA	armadillo-like helical domain containing 1 [Source:MGI Symbol;Acc:MGI:2686507]	protein_coding;retained_intron	NA	0.825404	2.01792	0.409037	-1.2897	1.05877e-07	1.59698e-06	down	yes
ENSMUSG00000063409	Lrrc43	105110;105109	ENSMUST00000121444;ENSMUST00000094327	GO:0003674(molecular_function);GO:0005575(cellular_component);GO:0008150(biological_process);GO:0008150(biological_process)	NA	NA	NA	leucine rich repeat containing 43 [Source:MGI Symbol;Acc:MGI:2685907]	protein_coding	NA	3.33636	8.15385	0.409176	-1.28921	1.47943e-09	3.26401e-08	down	yes
ENSMUSG00000028337	Coro2a	92514;92515;92518;92517;92516	ENSMUST00000107756;ENSMUST00000135062;ENSMUST00000127304;ENSMUST00000139179;ENSMUST00000129121	GO:0003779(actin binding);GO:0005515(protein binding);GO:0005903(brush border);GO:0017053(transcriptional repressor complex);GO:0051015(actin filament binding);GO:0051015(actin filament binding)	NA	K13887	NA	coronin, actin binding protein 2A [Source:MGI Symbol;Acc:MGI:1345966]	protein_coding;processed_transcript;retained_intron	NA	1.02711	2.50923	0.409334	-1.28865	1.69601e-09	3.70065e-08	down	yes
ENSMUSG00000110279	Gm45552	120340	ENSMUST00000209340	NA	NA	NA	NA	predicted gene 45552 [Source:MGI Symbol;Acc:MGI:5791388]	antisense	NA	1.23277	3.01106	0.409415	-1.28836	4.64494e-06	4.66392e-05	down	yes
ENSMUSG00000044788	Fads6	30274;30275	ENSMUST00000056153;ENSMUST00000141006	GO:0003674(molecular_function);GO:0005575(cellular_component);GO:0006629(lipid metabolic process);GO:0006631(fatty acid metabolic process);GO:0006633(fatty acid biosynthetic process);GO:0008150(biological_process);GO:0016020(membrane);GO:0016021(integral component of membrane);GO:0016491(oxidoreductase activity);GO:0055114(oxidation-reduction process);GO:0055114(oxidation-reduction process)	NA	K12419	EC:1.14.19.-	fatty acid desaturase domain family, member 6 [Source:MGI Symbol;Acc:MGI:3039592]	protein_coding;processed_transcript	NA	0.157734	0.385012	0.409686	-1.28741	2.92973e-06	3.09623e-05	down	yes
ENSMUSG00000086549	Gm13648	98536	ENSMUST00000138361	NA	NA	NA	NA	predicted gene 13648 [Source:MGI Symbol;Acc:MGI:3652033]	processed_transcript	NA	1.48059	3.61219	0.409885	-1.28671	6.49914e-08	1.01974e-06	down	yes
ENSMUSG00000041319	Thoc6	59060;59065;59059;59062;59061	ENSMUST00000047436;ENSMUST00000135259;ENSMUST00000125443;ENSMUST00000095579;ENSMUST00000133849	GO:0000346(transcription export complex);GO:0000347(THO complex);GO:0000445(THO complex part of transcription export complex);GO:0000784(nuclear chromosome, telomeric region);GO:0003723(RNA binding);GO:0005515(protein binding);GO:0005634(nucleus);GO:0005654(nucleoplasm);GO:0006397(mRNA processing);GO:0006406(mRNA export from nucleus);GO:0006915(apoptotic process);GO:0007275(multicellular organism…	03013(RNA transport);03013(RNA transport)	K13175	NA	THO complex 6 [Source:MGI Symbol;Acc:MGI:2677480]	protein_coding;retained_intron	R_MMU_72203(Processing_of_Capped_Intron_Containing_Pre_mRNA);R_MMU_72187(mRNA_3'_end_processing);R_MMU_73857(RNA_Polymerase_II_Transcription);R_MMU_73856(RNA_Polymerase_II_Transcription_Termination);R_MMU_8953854(Metabolism_of_RNA);R_MMU_159236(Transport_of_Mature_mRNA_derived_from_an_Intron_Containing_Transcript);R_MMU_74160(Gene_expression_(Transcription));R_MMU_72202(Transport_of_Mature_Transc…	1.85704	4.52985	0.409956	-1.28646	9.29797e-09	1.73115e-07	down	yes
ENSMUSG00000029379	Cxcl3	102582;102583	ENSMUST00000031326;ENSMUST00000201840	GO:0005125(cytokine activity);GO:0005515(protein binding);GO:0005576(extracellular region);GO:0005615(extracellular space);GO:0006935(chemotaxis);GO:0006952(defense response);GO:0006954(inflammatory response);GO:0006955(immune response);GO:0007204(positive regulation of cytosolic calcium ion concentration);GO:0008009(chemokine activity);GO:0030593(neutrophil chemotaxis);GO:0030595(leukocyte chemo…	04060(Cytokine-cytokine receptor interaction);04062(Chemokine signaling pathway);04621(NOD-like receptor signaling pathway);04657(IL-17 signaling pathway);04668(TNF signaling pathway);05132(Salmonella infection);05134(Legionellosis);05167(Kaposi sarcoma-associated herpesvirus infection);05167(Kaposi sarcoma-associated herpesvirus infection)	K05505	NA	chemokine (C-X-C motif) ligand 3 [Source:MGI Symbol;Acc:MGI:3037818]	protein_coding;retained_intron	R_MMU_373076(Class_A/1_(Rhodopsin_like_receptors));R_MMU_380108(Chemokine_receptors_bind_chemokines);R_MMU_375276(Peptide_ligand_binding_receptors);R_MMU_500792(GPCR_ligand_binding);R_MMU_168256(Immune_System);R_MMU_372790(Signaling_by_GPCR);R_MMU_388396(GPCR_downstream_signalling);R_MMU_6798695(Neutrophil_degranulation);R_MMU_168249(Innate_Immune_System);R_MMU_162582(Signal_Transduction);R_MMU_4…	0.47682	1.16266	0.410111	-1.28591	2.82551e-07	3.89071e-06	down	yes
ENSMUSG00000035165	Kcne3	123511;123514;123510;123515;123513	ENSMUST00000207358;ENSMUST00000170954;ENSMUST00000178946;ENSMUST00000179842;ENSMUST00000049333	GO:0005244(voltage-gated ion channel activity);GO:0005249(voltage-gated potassium channel activity);GO:0005251(delayed rectifier potassium channel activity);GO:0005267(potassium channel activity);GO:0005737(cytoplasm);GO:0005886(plasma membrane);GO:0006811(ion transport);GO:0006813(potassium ion transport);GO:0008076(voltage-gated potassium channel complex);GO:0015459(potassium channel regulator …	04974(Protein digestion and absorption);04974(Protein digestion and absorption)	K04897	NA	potassium voltage-gated channel, Isk-related subfamily, gene 3 [Source:MGI Symbol;Acc:MGI:1891124]	protein_coding	R_MMU_5576893(Phase_2_plateau_phase);R_MMU_5576891(Cardiac_conduction);R_MMU_5576890(Phase_3_rapid_repolarisation);R_MMU_397014(Muscle_contraction)	1.50752	3.67562	0.41014	-1.28581	3.8779e-08	6.33523e-07	down	yes
ENSMUSG00000089694	Nat8f7	111567;111568	ENSMUST00000160534;ENSMUST00000179613	GO:0004402(histone acetyltransferase activity);GO:0005634(nucleus);GO:0008080(N-acetyltransferase activity);GO:0010485(H4 histone acetyltransferase activity);GO:0016020(membrane);GO:0016021(integral component of membrane);GO:0016573(histone acetylation);GO:0016740(transferase activity);GO:0016746(transferase activity, transferring acyl groups);GO:0031965(nuclear membrane);GO:0043967(histone H4 ac…	00480(Glutathione metabolism);00480(Glutathione metabolism)	K20838	2.3.1.-;EC:2.3.1.80	N-acetyltransferase 8 (GCN5-related) family member 7 [Source:MGI Symbol;Acc:MGI:3782661]	protein_coding	NA	1.08136	2.63585	0.410249	-1.28543	1.33166e-07	1.98163e-06	down	yes
ENSMUSG00000031779	Ccl22	132497	ENSMUST00000034231	GO:0002548(monocyte chemotaxis);GO:0005125(cytokine activity);GO:0005576(extracellular region);GO:0005615(extracellular space);GO:0006935(chemotaxis);GO:0006954(inflammatory response);GO:0006955(immune response);GO:0007165(signal transduction);GO:0007186(G protein-coupled receptor signaling pathway);GO:0008009(chemokine activity);GO:0030593(neutrophil chemotaxis);GO:0031640(killing of cells of ot…	04060(Cytokine-cytokine receptor interaction);04062(Chemokine signaling pathway);04625(C-type lectin receptor signaling pathway)	K21095	NA	chemokine (C-C motif) ligand 22 [Source:MGI Symbol;Acc:MGI:1306779]	protein_coding	R_MMU_373076(Class_A/1_(Rhodopsin_like_receptors));R_MMU_380108(Chemokine_receptors_bind_chemokines);R_MMU_375276(Peptide_ligand_binding_receptors);R_MMU_500792(GPCR_ligand_binding);R_MMU_372790(Signaling_by_GPCR);R_MMU_162582(Signal_Transduction)	0.485375	1.1822	0.410568	-1.28431	2.57339e-06	2.75823e-05	down	yes
ENSMUSG00000020218	Wif1	21767;21769	ENSMUST00000020439;ENSMUST00000145691	GO:0005102(signaling receptor binding);GO:0005576(extracellular region);GO:0007275(multicellular organism development);GO:0009986(cell surface);GO:0016055(Wnt signaling pathway);GO:0017147(Wnt-protein binding);GO:0030178(negative regulation of Wnt signaling pathway);GO:0045600(positive regulation of fat cell differentiation);GO:0048856(anatomical structure development);GO:0048856(anatomical struc…	04310(Wnt signaling pathway);04310(Wnt signaling pathway)	K01691	NA	Wnt inhibitory factor 1 [Source:MGI Symbol;Acc:MGI:1344332]	protein_coding;retained_intron	NA	2.48134	6.02887	0.411577	-1.28077	2.55385e-09	5.35625e-08	down	yes
ENSMUSG00000096606	Tpbgl	123441	ENSMUST00000178124	GO:0005515(protein binding);GO:0016020(membrane);GO:0016021(integral component of membrane)	NA	NA	NA	trophoblast glycoprotein-like [Source:MGI Symbol;Acc:MGI:3646425]	protein_coding	NA	0.58418	1.41882	0.411735	-1.28021	2.46797e-07	3.45538e-06	down	yes
ENSMUSG00000032517	Mobp	142137;142133;142136;142139;142134	ENSMUST00000174193;ENSMUST00000068698;ENSMUST00000093773;ENSMUST00000214008;ENSMUST00000215512	GO:0003779(actin binding);GO:0005737(cytoplasm);GO:0005739(mitochondrion);GO:0005829(cytosol);GO:0017022(myosin binding);GO:0017137(Rab GTPase binding);GO:0019911(structural constituent of myelin sheath);GO:0030864(cortical actin cytoskeleton);GO:0043209(myelin sheath);GO:0048471(perinuclear region of cytoplasm);GO:0048471(perinuclear region of cytoplasm)	NA	NA	NA	myelin-associated oligodendrocytic basic protein [Source:MGI Symbol;Acc:MGI:108511]	nonsense_mediated_decay;protein_coding;retained_intron	NA	0.435776	1.05838	0.41174	-1.28019	2.98632e-08	4.98652e-07	down	yes
ENSMUSG00000041782	Lad1	12948;12949;12950	ENSMUST00000038760;ENSMUST00000190773;ENSMUST00000185756	GO:0005198(structural molecule activity);GO:0005576(extracellular region);GO:0005604(basement membrane);GO:0015629(actin cytoskeleton);GO:0015629(actin cytoskeleton)	NA	NA	NA	ladinin [Source:MGI Symbol;Acc:MGI:109343]	protein_coding;processed_transcript	NA	0.871884	2.11431	0.412372	-1.27798	2.45359e-08	4.19411e-07	down	yes
ENSMUSG00000017697	Ada	82596;82597	ENSMUST00000017841;ENSMUST00000156939	GO:0001666(response to hypoxia);GO:0001701(in utero embryonic development);GO:0001821(histamine secretion);GO:0001829(trophectodermal cell differentiation);GO:0001883(purine nucleoside binding);GO:0001889(liver development);GO:0001890(placenta development);GO:0002314(germinal center B cell differentiation);GO:0002636(positive regulation of germinal center formation);GO:0002686(negative regulation…	00230(Purine metabolism);05340(Primary immunodeficiency);05340(Primary immunodeficiency)	NA	NA	adenosine deaminase [Source:MGI Symbol;Acc:MGI:87916]	protein_coding;processed_transcript	R_MMU_74217(Purine_salvage);R_MMU_1430728(Metabolism);R_MMU_8956321(Nucleotide_salvage);R_MMU_15869(Metabolism_of_nucleotides)	2.46817	5.97976	0.412754	-1.27665	5.36858e-09	1.06586e-07	down	yes
ENSMUSG00000036151	Tm6sf2	130754;130758;130756;130757	ENSMUST00000110160;ENSMUST00000124742;ENSMUST00000148015;ENSMUST00000149928	GO:0005789(endoplasmic reticulum membrane);GO:0016020(membrane);GO:0016021(integral component of membrane);GO:0019216(regulation of lipid metabolic process);GO:0033116(endoplasmic reticulum-Golgi intermediate compartment membrane);GO:0042802(identical protein binding);GO:0042802(identical protein binding)	NA	NA	NA	transmembrane 6 superfamily member 2 [Source:MGI Symbol;Acc:MGI:1933210]	protein_coding;retained_intron	NA	1.16283	2.81618	0.412909	-1.2761	1.41773e-07	2.09204e-06	down	yes
ENSMUSG00000032511	Scn5a	142068;142067	ENSMUST00000117911;ENSMUST00000065196	GO:0001518(voltage-gated sodium channel complex);GO:0002027(regulation of heart rate);GO:0003231(cardiac ventricle development);GO:0005216(ion channel activity);GO:0005244(voltage-gated ion channel activity);GO:0005248(voltage-gated sodium channel activity);GO:0005261(cation channel activity);GO:0005272(sodium channel activity);GO:0005515(protein binding);GO:0005516(calmodulin binding);GO:0005654…	04261(Adrenergic signaling in cardiomyocytes);04261(Adrenergic signaling in cardiomyocytes)	K04838	NA	sodium channel, voltage-gated, type V, alpha [Source:MGI Symbol;Acc:MGI:98251]	protein_coding	R_MMU_5576892(Phase_0_rapid_depolarisation);R_MMU_5576891(Cardiac_conduction);R_MMU_397014(Muscle_contraction)	0.39765	0.962782	0.413022	-1.27571	1.72371e-08	3.04829e-07	down	yes
ENSMUSG00000020897	Aurkb	25830;25832;25834;25835;25836;25833;25831;25829	ENSMUST00000021277;ENSMUST00000126576;ENSMUST00000156373;ENSMUST00000149018;ENSMUST00000140531;ENSMUST00000139594;ENSMUST00000139457;ENSMUST00000108666	GO:0000122(negative regulation of transcription by RNA polymerase II);GO:0000166(nucleotide binding);GO:0000775(chromosome, centromeric region);GO:0000776(kinetochore);GO:0000779(condensed chromosome, centromeric region);GO:0000780(condensed nuclear chromosome, centromeric region);GO:0002903(negative regulation of B cell apoptotic process);GO:0004672(protein kinase activity);GO:0004674(protein se…	NA	K11479	EC:2.7.11.1	aurora kinase B [Source:MGI Symbol;Acc:MGI:107168]	protein_coding;retained_intron;processed_transcript	R_MMU_69620(Cell_Cycle_Checkpoints);R_MMU_73857(RNA_Polymerase_II_Transcription);R_MMU_9648025(EML4_and_NUDC_in_mitotic_spindle_formation);R_MMU_2467813(Separation_of_Sister_Chromatids);R_MMU_212436(Generic_Transcription_Pathway);R_MMU_1640170(Cell_Cycle);R_MMU_141444(Amplification__of_signal_from_unattached__kinetochores_via_a_MAD2__inhibitory_signal);R_MMU_5663220(RHO_GTPases_Activate_Formins);…	0.560046	1.35558	0.413141	-1.27529	6.25054e-07	7.97686e-06	down	yes
ENSMUSG00000037624	Kcnk2	15664;15666;15669;15665;15670	ENSMUST00000079451;ENSMUST00000180044;ENSMUST00000193319;ENSMUST00000110920;ENSMUST00000192723	GO:0003231(cardiac ventricle development);GO:0005249(voltage-gated potassium channel activity);GO:0005267(potassium channel activity);GO:0005515(protein binding);GO:0005634(nucleus);GO:0005783(endoplasmic reticulum);GO:0005886(plasma membrane);GO:0005887(integral component of plasma membrane);GO:0006811(ion transport);GO:0006813(potassium ion transport);GO:0007186(G protein-coupled receptor signa…	04927(Cortisol synthesis and secretion);04934(Cushing syndrome);04971(Gastric acid secretion);04971(Gastric acid secretion)	K04913	NA	potassium channel, subfamily K, member 2 [Source:MGI Symbol;Acc:MGI:109366]	protein_coding;nonsense_mediated_decay	R_MMU_5576886(Phase_4_resting_membrane_potential);R_MMU_1299503(TWIK_related_potassium_channel_(TREK));R_MMU_1296346(Tandem_pore_domain_potassium_channels);R_MMU_5576891(Cardiac_conduction);R_MMU_112316(Neuronal_System);R_MMU_1296071(Potassium_Channels);R_MMU_397014(Muscle_contraction)	2.78625	6.74263	0.413229	-1.27499	6.86627e-10	1.59472e-08	down	yes
ENSMUSG00000005947	Itgae	26614;26613	ENSMUST00000006101;ENSMUST00000102537	GO:0007155(cell adhesion);GO:0007229(integrin-mediated signaling pathway);GO:0008305(integrin complex);GO:0009897(external side of plasma membrane);GO:0016020(membrane);GO:0016021(integral component of membrane);GO:0046872(metal ion binding);GO:0046872(metal ion binding)	04810(Regulation of actin cytoskeleton);04810(Regulation of actin cytoskeleton)	K06524	NA	integrin alpha E, epithelial-associated [Source:MGI Symbol;Acc:MGI:1298377]	protein_coding;retained_intron	R_MMU_1474244(Extracellular_matrix_organization);R_MMU_216083(Integrin_cell_surface_interactions)	0.358586	0.86748	0.413366	-1.27451	3.86201e-07	5.15248e-06	down	yes
ENSMUSG00000023999	Kif6	63342;63345;63343;63340	ENSMUST00000162854;ENSMUST00000162419;ENSMUST00000160049;ENSMUST00000024798	GO:0000166(nucleotide binding);GO:0001673(male germ cell nucleus);GO:0003774(motor activity);GO:0003777(microtubule motor activity);GO:0005524(ATP binding);GO:0005871(kinesin complex);GO:0005874(microtubule);GO:0007018(microtubule-based movement);GO:0008017(microtubule binding);GO:0016887(ATPase activity);GO:0016887(ATPase activity)	NA	K10397	NA	kinesin family member 6 [Source:MGI Symbol;Acc:MGI:1098238]	protein_coding;retained_intron	R_MMU_5653656(Vesicle_mediated_transport);R_MMU_109582(Hemostasis);R_MMU_6811434(COPI_dependent_Golgi_to_ER_retrograde_traffic);R_MMU_983231(Factors_involved_in_megakaryocyte_development_and_platelet_production);R_MMU_983189(Kinesins);R_MMU_168256(Immune_System);R_MMU_8856688(Golgi_to_ER_retrograde_transport);R_MMU_2132295(MHC_class_II_antigen_presentation);R_MMU_199991(Membrane_Trafficking);R_MM…	0.341373	0.825339	0.413616	-1.27364	1.76999e-07	2.54785e-06	down	yes
ENSMUSG00000050737	Ptges	75107;75109;75108	ENSMUST00000102852;ENSMUST00000132244;ENSMUST00000056046	GO:0001516(prostaglandin biosynthetic process);GO:0002526(acute inflammatory response);GO:0002544(chronic inflammatory response);GO:0004364(glutathione transferase activity);GO:0004602(glutathione peroxidase activity);GO:0004667(prostaglandin-D synthase activity);GO:0005641(nuclear envelope lumen);GO:0005737(cytoplasm);GO:0006629(lipid metabolic process);GO:0006631(fatty acid metabolic process);G…	00590(Arachidonic acid metabolism);00590(Arachidonic acid metabolism)	K15729	EC:5.3.99.3	prostaglandin E synthase [Source:MGI Symbol;Acc:MGI:1927593]	protein_coding;processed_transcript	R_MMU_2162123(Synthesis_of_Prostaglandins_(PG)_and_Thromboxanes_(TX));R_MMU_556833(Metabolism_of_lipids);R_MMU_1430728(Metabolism);R_MMU_8978868(Fatty_acid_metabolism);R_MMU_2142753(Arachidonic_acid_metabolism)	4.20829	10.1678	0.413885	-1.2727	5.09651e-10	1.2139e-08	down	yes
ENSMUSG00000040703	Cyp2s1	118020;118018;118019	ENSMUST00000152560;ENSMUST00000043314;ENSMUST00000108395	GO:0004497(monooxygenase activity);GO:0004796(thromboxane-A synthase activity);GO:0005506(iron ion binding);GO:0005737(cytoplasm);GO:0005783(endoplasmic reticulum);GO:0005789(endoplasmic reticulum membrane);GO:0006082(organic acid metabolic process);GO:0006629(lipid metabolic process);GO:0006631(fatty acid metabolic process);GO:0006690(icosanoid metabolic process);GO:0006693(prostaglandin metabol…	00830(Retinol metabolism);00980(Metabolism of xenobiotics by cytochrome P450);00980(Metabolism of xenobiotics by cytochrome P450)	K07420	EC:1.14.14.1	cytochrome P450, family 2, subfamily s, polypeptide 1 [Source:MGI Symbol;Acc:MGI:1921384]	retained_intron;protein_coding	R_MMU_211897(Cytochrome_P450_arranged_by_substrate_type);R_MMU_1430728(Metabolism);R_MMU_211999(CYP2E1_reactions);R_MMU_211945(Phase_I_Functionalization_of_compounds);R_MMU_211958(Miscellaneous_substrates);R_MMU_211859(Biological_oxidations);R_MMU_211981(Xenobiotics)	16.8642	40.7405	0.413943	-1.2725	2.0902e-10	5.28817e-09	down	yes
ENSMUSG00000042433	Pih1h3b	4132	ENSMUST00000044806	GO:0005737(cytoplasm);GO:0005802(trans-Golgi network);GO:0008150(biological_process);GO:0045505(dynein intermediate chain binding)	NA	NA	NA	PIH1 domain containing 3B [Source:MGI Symbol;Acc:MGI:3607720]	protein_coding	NA	1.01856	2.45607	0.41471	-1.26983	8.17199e-07	1.00724e-05	down	yes
ENSMUSG00000022629	Kif21a	52213;52216;52214;52217;52215;52219;52218	ENSMUST00000100304;ENSMUST00000109287;ENSMUST00000109288;ENSMUST00000067205;ENSMUST00000088614;ENSMUST00000229801;ENSMUST00000230487	GO:0000166(nucleotide binding);GO:0003774(motor activity);GO:0003777(microtubule motor activity);GO:0005515(protein binding);GO:0005524(ATP binding);GO:0005737(cytoplasm);GO:0005829(cytosol);GO:0005856(cytoskeleton);GO:0005871(kinesin complex);GO:0005874(microtubule);GO:0005886(plasma membrane);GO:0007018(microtubule-based movement);GO:0008017(microtubule binding);GO:0016887(ATPase activity);GO:0…	NA	K10395	NA	kinesin family member 21A [Source:MGI Symbol;Acc:MGI:109188]	protein_coding	R_MMU_5653656(Vesicle_mediated_transport);R_MMU_109582(Hemostasis);R_MMU_6811434(COPI_dependent_Golgi_to_ER_retrograde_traffic);R_MMU_983231(Factors_involved_in_megakaryocyte_development_and_platelet_production);R_MMU_983189(Kinesins);R_MMU_168256(Immune_System);R_MMU_8856688(Golgi_to_ER_retrograde_transport);R_MMU_2132295(MHC_class_II_antigen_presentation);R_MMU_199991(Membrane_Trafficking);R_MM…	3.11228	7.49577	0.415205	-1.2681	4.91418e-10	1.174e-08	down	yes
ENSMUSG00000103711	Tstd1	14658;14656;14657	ENSMUST00000194029;ENSMUST00000193060;ENSMUST00000171362	GO:0003674(molecular_function);GO:0005737(cytoplasm);GO:0005739(mitochondrion);GO:0005829(cytosol);GO:0008150(biological_process);GO:0036464(cytoplasmic ribonucleoprotein granule);GO:0050337(thiosulfate-thiol sulfurtransferase activity);GO:0070221(sulfide oxidation, using sulfide:quinone oxidoreductase);GO:0070221(sulfide oxidation, using sulfide:quinone oxidoreductase)	NA	K01013	EC:2.8.1.-	thiosulfate sulfurtransferase (rhodanese)-like domain containing 1 [Source:MGI Symbol;Acc:MGI:3648482]	retained_intron;processed_transcript;protein_coding	R_MMU_1614558(Degradation_of_cysteine_and_homocysteine);R_MMU_1430728(Metabolism);R_MMU_1614635(Sulfur_amino_acid_metabolism);R_MMU_1614517(Sulfide_oxidation_to_sulfate);R_MMU_71291(Metabolism_of_amino_acids_and_derivatives)	1.15084	2.76859	0.415678	-1.26646	8.62986e-06	8.08119e-05	down	yes
ENSMUSG00000020990	Cdkl1	33501;33503	ENSMUST00000021377;ENSMUST00000221646	GO:0000166(nucleotide binding);GO:0004672(protein kinase activity);GO:0004674(protein serine/threonine kinase activity);GO:0004693(cyclin-dependent protein serine/threonine kinase activity);GO:0005524(ATP binding);GO:0005634(nucleus);GO:0005654(nucleoplasm);GO:0005737(cytoplasm);GO:0006468(protein phosphorylation);GO:0007507(heart development);GO:0016301(kinase activity);GO:0016310(phosphorylatio…	NA	K08824	EC:2.7.11.22	cyclin-dependent kinase-like 1 (CDC2-related kinase) [Source:MGI Symbol;Acc:MGI:1918341]	protein_coding	NA	0.479237	1.15266	0.415765	-1.26616	7.46708e-06	7.10134e-05	down	yes
ENSMUSG00000031821	Gins2	133807;133808;133806	ENSMUST00000034278;ENSMUST00000155609;ENSMUST00000146526	GO:0000727(double-strand break repair via break-induced replication);GO:0000811(GINS complex);GO:0005634(nucleus);GO:0006260(DNA replication);GO:0031298(replication fork protection complex);GO:0032508(DNA duplex unwinding);GO:0043138(3'-5' DNA helicase activity);GO:0043138(3'-5' DNA helicase activity)	NA	K10733	NA	GINS complex subunit 2 (Psf2 homolog) [Source:MGI Symbol;Acc:MGI:1921019]	protein_coding;retained_intron	R_MMU_69190(DNA_strand_elongation);R_MMU_69239(Synthesis_of_DNA);R_MMU_69242(S_Phase);R_MMU_1640170(Cell_Cycle);R_MMU_69278(Cell_Cycle,_Mitotic);R_MMU_176974(Unwinding_of_DNA);R_MMU_69306(DNA_Replication)	1.09513	2.63368	0.415817	-1.26598	8.69692e-09	1.63653e-07	down	yes
ENSMUSG00000104927	Gm43388	54671	ENSMUST00000197818	NA	NA	NA	NA	predicted gene 43388 [Source:MGI Symbol;Acc:MGI:5663525]	lincRNA	NA	0.813996	1.95563	0.416233	-1.26454	7.43029e-06	7.07059e-05	down	yes
ENSMUSG00000021226	Acot2	34318	ENSMUST00000021649	GO:0000038(very long-chain fatty acid metabolic process);GO:0001666(response to hypoxia);GO:0001676(long-chain fatty acid metabolic process);GO:0005739(mitochondrion);GO:0005759(mitochondrial matrix);GO:0006629(lipid metabolic process);GO:0006631(fatty acid metabolic process);GO:0006637(acyl-CoA metabolic process);GO:0016290(palmitoyl-CoA hydrolase activity);GO:0016787(hydrolase activity);GO:0016…	00062(Fatty acid elongation);01040(Biosynthesis of unsaturated fatty acids);04913(Ovarian steroidogenesis)	K01068	EC:3.1.2.2	acyl-CoA thioesterase 2 [Source:MGI Symbol;Acc:MGI:2159605]	protein_coding	R_MMU_9033241(Peroxisomal_protein_import);R_MMU_9609507(Protein_localization);R_MMU_556833(Metabolism_of_lipids);R_MMU_1430728(Metabolism);R_MMU_8978868(Fatty_acid_metabolism);R_MMU_77289(Mitochondrial_Fatty_Acid_Beta_Oxidation)	2.59512	6.23224	0.416402	-1.26395	5.07031e-09	1.01128e-07	down	yes
ENSMUSG00000103088	Pcdhgb6	66515	ENSMUST00000003599	GO:0003674(molecular_function);GO:0005509(calcium ion binding);GO:0005886(plasma membrane);GO:0007155(cell adhesion);GO:0007156(homophilic cell adhesion via plasma membrane adhesion molecules);GO:0008150(biological_process);GO:0016020(membrane);GO:0016021(integral component of membrane)	NA	K16496	NA	protocadherin gamma subfamily B, 6 [Source:MGI Symbol;Acc:MGI:1935197]	protein_coding	NA	0.510229	1.22286	0.417241	-1.26105	1.04966e-07	1.58579e-06	down	yes
ENSMUSG00000031725	Ces1f	132343;132344;132345;132348;132346;132347	ENSMUST00000034178;ENSMUST00000156737;ENSMUST00000151261;ENSMUST00000140026;ENSMUST00000124066;ENSMUST00000133879	GO:0004771(sterol esterase activity);GO:0004806(triglyceride lipase activity);GO:0005615(extracellular space);GO:0005737(cytoplasm);GO:0005783(endoplasmic reticulum);GO:0005811(lipid droplet);GO:0005829(cytosol);GO:0016042(lipid catabolic process);GO:0016787(hydrolase activity);GO:0019626(short-chain fatty acid catabolic process);GO:0043231(intracellular membrane-bounded organelle);GO:0052689(car…	00983(Drug metabolism - other enzymes);00983(Drug metabolism - other enzymes)	K01044	EC:3.1.1.1	carboxylesterase 1F [Source:MGI Symbol;Acc:MGI:2142687]	protein_coding;retained_intron;nonsense_mediated_decay	NA	0.825149	1.97704	0.417366	-1.26061	8.29631e-08	1.27277e-06	down	yes
ENSMUSG00000038756	Ttll6	28382;28383	ENSMUST00000167258;ENSMUST00000107680	GO:0000166(nucleotide binding);GO:0000226(microtubule cytoskeleton organization);GO:0001578(microtubule bundle formation);GO:0003353(positive regulation of cilium movement);GO:0005515(protein binding);GO:0005524(ATP binding);GO:0005737(cytoplasm);GO:0005856(cytoskeleton);GO:0005874(microtubule);GO:0005929(cilium);GO:0006464(cellular protein modification process);GO:0015631(tubulin binding);GO:001…	NA	K16582	EC:6.-.-.-	tubulin tyrosine ligase-like family, member 6 [Source:MGI Symbol;Acc:MGI:2683461]	protein_coding	R_MMU_597592(Post_translational_protein_modification);R_MMU_392499(Metabolism_of_proteins);R_MMU_8955332(Carboxyterminal_post_translational_modifications_of_tubulin)	2.64644	6.33944	0.417457	-1.2603	1.46231e-09	3.23524e-08	down	yes
ENSMUSG00000089661	Mia	118126;118128	ENSMUST00000071986;ENSMUST00000121848	GO:0005515(protein binding);GO:0005576(extracellular region);GO:0007160(cell-matrix adhesion);GO:0007165(signal transduction);GO:0008083(growth factor activity);GO:0030198(extracellular matrix organization);GO:0030198(extracellular matrix organization)	NA	K16655	NA	melanoma inhibitory activity [Source:MGI Symbol;Acc:MGI:109615]	protein_coding	NA	0.859136	2.0565	0.417767	-1.25923	1.52931e-05	0.000133513	down	yes
ENSMUSG00000027661	Slc2a10	82842	ENSMUST00000029196	GO:0005355(glucose transmembrane transporter activity);GO:0005737(cytoplasm);GO:0005886(plasma membrane);GO:0005887(integral component of plasma membrane);GO:0008643(carbohydrate transport);GO:0010628(positive regulation of gene expression);GO:0010629(negative regulation of gene expression);GO:0012505(endomembrane system);GO:0016020(membrane);GO:0016021(integral component of membrane);GO:0022857(…	NA	K08147	NA	solute carrier family 2 (facilitated glucose transporter), member 10 [Source:MGI Symbol;Acc:MGI:2156687]	protein_coding	R_MMU_425407(SLC_mediated_transmembrane_transport);R_MMU_382551(Transport_of_small_molecules);R_MMU_189200(Cellular_hexose_transport)	1.00407	2.40282	0.417871	-1.25887	2.28838e-08	3.94143e-07	down	yes
ENSMUSG00000050157	Gm867	18954;18953	ENSMUST00000219979;ENSMUST00000059658	GO:0003674(molecular_function);GO:0005575(cellular_component);GO:0008150(biological_process);GO:0008150(biological_process)	NA	NA	NA	predicted gene 867 [Source:MGI Symbol;Acc:MGI:2685713]	protein_coding;processed_transcript	NA	8.32125	19.9099	0.417945	-1.25861	1.55057e-09	3.40203e-08	down	yes
ENSMUSG00000047515	BC049715	114828;114823;114821;114827	ENSMUST00000163640;ENSMUST00000052702;ENSMUST00000205058;ENSMUST00000203499	GO:0003674(molecular_function);GO:0005575(cellular_component);GO:0008150(biological_process);GO:0008150(biological_process)	NA	NA	NA	cDNA sequence BC049715 [Source:MGI Symbol;Acc:MGI:3605234]	protein_coding;retained_intron	NA	0.144966	0.346695	0.418139	-1.25795	1.04784e-05	9.59689e-05	down	yes
ENSMUSG00000095583	Ighv14-2	36395	ENSMUST00000103467	GO:0003823(antigen binding);GO:0006910(phagocytosis, recognition);GO:0006911(phagocytosis, engulfment);GO:0006958(complement activation, classical pathway);GO:0009897(external side of plasma membrane);GO:0034987(immunoglobulin receptor binding);GO:0042571(immunoglobulin complex, circulating);GO:0042742(defense response to bacterium);GO:0045087(innate immune response);GO:0050853(B cell receptor si…	NA	NA	NA	immunoglobulin heavy variable 14-2 [Source:MGI Symbol;Acc:MGI:4439607]	IG_V_gene	R_MMU_2871809(FCERI_mediated_Ca+2_mobilization);R_MMU_977606(Regulation_of_Complement_cascade);R_MMU_5653656(Vesicle_mediated_transport);R_MMU_2029481(FCGR_activation);R_MMU_2029480(Fcgamma_receptor_(FCGR)_dependent_phagocytosis);R_MMU_983705(Signaling_by_the_B_Cell_Receptor_(BCR));R_MMU_109582(Hemostasis);R_MMU_173623(Classical_antibody_mediated_complement_activation);R_MMU_166663(Initial_trigge…	70.6728	169.008	0.418162	-1.25787	5.36649e-10	1.27438e-08	down	yes
ENSMUSG00000110686	Gm45855	133047	ENSMUST00000212546	NA	NA	NA	NA	predicted gene 45855 [Source:MGI Symbol;Acc:MGI:5804970]	processed_pseudogene	NA	4.63556	11.0811	0.418331	-1.25728	1.44139e-08	2.59827e-07	down	yes
ENSMUSG00000046168	Kcnrg	46651;46652	ENSMUST00000225582;ENSMUST00000051184	GO:0005515(protein binding);GO:0005783(endoplasmic reticulum);GO:0042802(identical protein binding);GO:0051260(protein homooligomerization);GO:1902260(negative regulation of delayed rectifier potassium channel activity);GO:1902260(negative regulation of delayed rectifier potassium channel activity)	NA	NA	NA	potassium channel regulator [Source:MGI Symbol;Acc:MGI:2685591]	protein_coding	NA	9.4085	22.4422	0.419233	-1.25418	8.41537e-10	1.91251e-08	down	yes
ENSMUSG00000034919	Ttc22	94202;94203	ENSMUST00000047922;ENSMUST00000136505	GO:0003674(molecular_function);GO:0005515(protein binding);GO:0005575(cellular_component);GO:0008150(biological_process);GO:0008150(biological_process)	NA	NA	NA	tetratricopeptide repeat domain 22 [Source:MGI Symbol;Acc:MGI:3045307]	protein_coding;processed_transcript	NA	0.290147	0.691948	0.419319	-1.25388	1.03163e-05	9.46485e-05	down	yes
ENSMUSG00000022441	Efcab6	51797;51802;51803;51799;51801	ENSMUST00000156187;ENSMUST00000149563;ENSMUST00000140633;ENSMUST00000143592;ENSMUST00000163773	GO:0005509(calcium ion binding);GO:0005634(nucleus);GO:0005654(nucleoplasm);GO:0008150(biological_process);GO:0046872(metal ion binding);GO:0046872(metal ion binding)	NA	NA	NA	EF-hand calcium binding domain 6 [Source:MGI Symbol;Acc:MGI:1924877]	protein_coding;processed_transcript;retained_intron;nonsense_mediated_decay	NA	0.609627	1.4524	0.419738	-1.25244	1.72103e-08	3.04695e-07	down	yes
ENSMUSG00000022674	Ube2v2	54098;54100;54099;54104;54101;54102	ENSMUST00000229859;ENSMUST00000115776;ENSMUST00000115777;ENSMUST00000229244;ENSMUST00000118236;ENSMUST00000096234	GO:0000209(protein polyubiquitination);GO:0000729(DNA double-strand break processing);GO:0005515(protein binding);GO:0005634(nucleus);GO:0005654(nucleoplasm);GO:0006301(postreplication repair);GO:0010976(positive regulation of neuron projection development);GO:0031372(UBC13-MMS2 complex);GO:0032436(positive regulation of proteasomal ubiquitin-dependent protein catabolic process);GO:0042275(error-…	NA	K10704	NA	ubiquitin-conjugating enzyme E2 variant 2 [Source:MGI Symbol;Acc:MGI:1917870]	nonsense_mediated_decay;protein_coding;retained_intron	R_MMU_8852135(Protein_ubiquitination);R_MMU_69620(Cell_Cycle_Checkpoints);R_MMU_5693567(HDR_through_Homologous_Recombination_(HRR)_or_Single_Strand_Annealing_(SSA));R_MMU_1640170(Cell_Cycle);R_MMU_69481(G2/M_Checkpoints);R_MMU_5696398(Nucleotide_Excision_Repair);R_MMU_5693538(Homology_Directed_Repair);R_MMU_597592(Post_translational_protein_modification);R_MMU_69473(G2/M_DNA_damage_checkpoint);R_…	0.852483	2.0308	0.419776	-1.25231	5.4916e-09	1.08892e-07	down	yes
ENSMUSG00000010142	Tnfrsf13b	25345;25347;25349;25351;25350;25352	ENSMUST00000010286;ENSMUST00000139422;ENSMUST00000101103;ENSMUST00000130708;ENSMUST00000137832;ENSMUST00000123378	GO:0001782(B cell homeostasis);GO:0002244(hematopoietic progenitor cell differentiation);GO:0002250(adaptive immune response);GO:0002376(immune system process);GO:0005887(integral component of plasma membrane);GO:0009897(external side of plasma membrane);GO:0016020(membrane);GO:0016021(integral component of membrane);GO:0030889(negative regulation of B cell proliferation);GO:0030889(negative regu…	04060(Cytokine-cytokine receptor interaction);04672(Intestinal immune network for IgA production);05340(Primary immunodeficiency);05340(Primary immunodeficiency)	K05150	NA	tumor necrosis factor receptor superfamily, member 13b [Source:MGI Symbol;Acc:MGI:1889411]	protein_coding;processed_transcript	R_MMU_5668541(TNFR2_non_canonical_NF_kB_pathway);R_MMU_5669034(TNFs_bind_their_physiological_receptors);R_MMU_168256(Immune_System);R_MMU_1280215(Cytokine_Signaling_in_Immune_system)	5.32819	12.6891	0.419905	-1.25187	1.01285e-09	2.27898e-08	down	yes
ENSMUSG00000031951	Tmem231	133543;133545	ENSMUST00000034429;ENSMUST00000213050	GO:0001701(in utero embryonic development);GO:0001944(vasculature development);GO:0005515(protein binding);GO:0005886(plasma membrane);GO:0005929(cilium);GO:0007224(smoothened signaling pathway);GO:0016020(membrane);GO:0016021(integral component of membrane);GO:0030030(cell projection organization);GO:0032880(regulation of protein localization);GO:0035869(ciliary transition zone);GO:0036038(MKS c…	NA	K19362	NA	transmembrane protein 231 [Source:MGI Symbol;Acc:MGI:2685024]	protein_coding;retained_intron	NA	1.1101	2.6379	0.420827	-1.2487	6.31157e-09	1.23301e-07	down	yes
ENSMUSG00000026303	Mlph	11359;11360;11361	ENSMUST00000027528;ENSMUST00000125149;ENSMUST00000136220	GO:0006886(intracellular protein transport);GO:0017022(myosin binding);GO:0017137(Rab GTPase binding);GO:0030425(dendrite);GO:0030674(protein-macromolecule adaptor activity);GO:0048471(perinuclear region of cytoplasm);GO:0048471(perinuclear region of cytoplasm)	NA	K22235	NA	melanophilin [Source:MGI Symbol;Acc:MGI:2176380]	protein_coding;retained_intron	NA	4.91659	11.6617	0.421603	-1.24604	7.37009e-10	1.69437e-08	down	yes
ENSMUSG00000039787	Cercam	74859;74862;74858;74861;74860	ENSMUST00000047521;ENSMUST00000155355;ENSMUST00000154464;ENSMUST00000153863;ENSMUST00000134152	GO:0005575(cellular_component);GO:0005783(endoplasmic reticulum);GO:0005788(endoplasmic reticulum lumen);GO:0007155(cell adhesion);GO:0042802(identical protein binding);GO:0042802(identical protein binding)	NA	NA	NA	cerebral endothelial cell adhesion molecule [Source:MGI Symbol;Acc:MGI:2139134]	protein_coding;retained_intron	NA	0.467356	1.1082	0.421724	-1.24563	1.1888e-06	1.39276e-05	down	yes
ENSMUSG00000096878	Gm21083	99083	ENSMUST00000188807	NA	NA	NA	NA	predicted gene, 21083 [Source:MGI Symbol;Acc:MGI:5434438]	protein_coding	NA	0.875897	2.07595	0.421926	-1.24494	1.01533e-05	9.3369e-05	down	yes
ENSMUSG00000079942	Rpl28-ps3	95715	ENSMUST00000116058	NA	NA	NA	NA	ribosomal protein L28, pseudogene 3 [Source:MGI Symbol;Acc:MGI:3650282]	processed_pseudogene	NA	2.57395	6.09964	0.421983	-1.24474	1.00717e-05	9.27263e-05	down	yes
ENSMUSG00000097820	E530011L22Rik	142289;142290	ENSMUST00000181325;ENSMUST00000216791	NA	NA	NA	NA	RIKEN cDNA E530011L22 gene [Source:MGI Symbol;Acc:MGI:2443770]	antisense	NA	1.18119	2.79392	0.422771	-1.24205	6.96233e-09	1.34852e-07	down	yes
ENSMUSG00000076646	Ighv2-6-8	36373	ENSMUST00000192911	GO:0003823(antigen binding);GO:0006910(phagocytosis, recognition);GO:0006911(phagocytosis, engulfment);GO:0006958(complement activation, classical pathway);GO:0009897(external side of plasma membrane);GO:0034987(immunoglobulin receptor binding);GO:0042571(immunoglobulin complex, circulating);GO:0042742(defense response to bacterium);GO:0045087(innate immune response);GO:0050853(B cell receptor si…	NA	NA	NA	immunoglobulin heavy variable 2-6-8 [Source:MGI Symbol;Acc:MGI:4439811]	IG_V_gene	NA	11.6027	27.3597	0.424079	-1.2376	2.62939e-08	4.46097e-07	down	yes
ENSMUSG00000018581	Dnah11	36690;36689;36691;36692	ENSMUST00000084806;ENSMUST00000176756;ENSMUST00000175662;ENSMUST00000176239	GO:0000166(nucleotide binding);GO:0003341(cilium movement);GO:0003351(epithelial cilium movement involved in extracellular fluid movement);GO:0003356(regulation of cilium beat frequency);GO:0003774(motor activity);GO:0003777(microtubule motor activity);GO:0005524(ATP binding);GO:0005576(extracellular region);GO:0005737(cytoplasm);GO:0005856(cytoskeleton);GO:0005874(microtubule);GO:0005929(cilium)…	05016(Huntington disease);05016(Huntington disease)	K10408	NA	dynein, axonemal, heavy chain 11 [Source:MGI Symbol;Acc:MGI:1100864]	protein_coding;nonsense_mediated_decay;retained_intron;processed_transcript	NA	0.933691	2.20013	0.42438	-1.23657	2.04333e-09	4.39801e-08	down	yes
ENSMUSG00000036962	Cfap221	12140;12141;12142	ENSMUST00000174370;ENSMUST00000037840;ENSMUST00000174458	GO:0003341(cilium movement);GO:0005516(calmodulin binding);GO:0005737(cytoplasm);GO:0005856(cytoskeleton);GO:0005929(cilium);GO:0005930(axoneme);GO:0030030(cell projection organization);GO:0042995(cell projection);GO:0044458(motile cilium assembly);GO:0060271(cilium assembly);GO:0060271(cilium assembly)	NA	NA	NA	cilia and flagella associated protein 221 [Source:MGI Symbol;Acc:MGI:2684947]	protein_coding	NA	2.19786	5.17855	0.424416	-1.23645	7.97745e-09	1.52282e-07	down	yes
ENSMUSG00000064208	Gm10145	16999	ENSMUST00000077776	NA	NA	NA	NA	predicted gene 10145 [Source:MGI Symbol;Acc:MGI:3704353]	processed_pseudogene	NA	2.65477	6.25372	0.42451	-1.23613	3.94712e-06	4.06052e-05	down	yes
ENSMUSG00000071202	Ccdc78	59726;59725	ENSMUST00000235405;ENSMUST00000095500	GO:0003009(skeletal muscle contraction);GO:0003674(molecular_function);GO:0005737(cytoplasm);GO:0005814(centriole);GO:0005856(cytoskeleton);GO:0005886(plasma membrane);GO:0016020(membrane);GO:0016529(sarcoplasmic reticulum);GO:0030030(cell projection organization);GO:0042383(sarcolemma);GO:0048471(perinuclear region of cytoplasm);GO:0098535(de novo centriole assembly involved in multi-ciliated ep…	NA	NA	NA	coiled-coil domain containing 78 [Source:MGI Symbol;Acc:MGI:2685784]	retained_intron;protein_coding	NA	9.65861	22.7388	0.424763	-1.23527	1.19735e-09	2.66389e-08	down	yes
ENSMUSG00000040136	Abcc8	120755;120759;120751;120758;120752;120754	ENSMUST00000033123;ENSMUST00000210986;ENSMUST00000210655;ENSMUST00000210110;ENSMUST00000209432;ENSMUST00000210637	GO:0000166(nucleotide binding);GO:0001678(cellular glucose homeostasis);GO:0005267(potassium channel activity);GO:0005524(ATP binding);GO:0005739(mitochondrion);GO:0005886(plasma membrane);GO:0006813(potassium ion transport);GO:0007565(female pregnancy);GO:0007613(memory);GO:0008281(sulfonylurea receptor activity);GO:0008282(inward rectifying potassium channel);GO:0008542(visual learning);GO:0009…	02010(ABC transporters);04911(Insulin secretion);04930(Type II diabetes mellitus);04930(Type II diabetes mellitus)	K05032	NA	ATP-binding cassette, sub-family C (CFTR/MRP), member 8 [Source:MGI Symbol;Acc:MGI:1352629]	protein_coding;retained_intron	R_MMU_163685(Integration_of_energy_metabolism);R_MMU_1430728(Metabolism);R_MMU_1296025(ATP_sensitive_Potassium_channels);R_MMU_112316(Neuronal_System);R_MMU_422356(Regulation_of_insulin_secretion);R_MMU_1296071(Potassium_Channels);R_MMU_1296065(Inwardly_rectifying_K+_channels)	0.177732	0.418352	0.424838	-1.23502	1.62383e-06	1.84123e-05	down	yes
ENSMUSG00000031444	F10	128584;128585;128588;128587;128586	ENSMUST00000063820;ENSMUST00000033821;ENSMUST00000152034;ENSMUST00000128418;ENSMUST00000123768	GO:0004252(serine-type endopeptidase activity);GO:0005509(calcium ion binding);GO:0005543(phospholipid binding);GO:0005576(extracellular region);GO:0005615(extracellular space);GO:0005783(endoplasmic reticulum);GO:0006508(proteolysis);GO:0007596(blood coagulation);GO:0007599(hemostasis);GO:0008233(peptidase activity);GO:0008236(serine-type peptidase activity);GO:0016020(membrane);GO:0016787(hydro…	04610(Complement and coagulation cascades);04610(Complement and coagulation cascades)	NA	NA	coagulation factor X [Source:MGI Symbol;Acc:MGI:103107]	protein_coding	R_MMU_159763(Transport_of_gamma_carboxylated_protein_precursors_from_the_endoplasmic_reticulum_to_the_Golgi_apparatus);R_MMU_159782(Removal_of_aminoterminal_propeptides_from_gamma_carboxylated_proteins);R_MMU_109582(Hemostasis);R_MMU_140837(Intrinsic_Pathway_of_Fibrin_Clot_Formation);R_MMU_159854(Gamma_carboxylation,_transport,_and_amino_terminal_cleavage_of_proteins);R_MMU_163841(Gamma_carboxyla…	2.83123	6.65934	0.425151	-1.23395	5.72983e-09	1.1305e-07	down	yes
ENSMUSG00000025279	Dnase1l3	42697	ENSMUST00000026315	GO:0000737(DNA catabolic process, endonucleolytic);GO:0002283(neutrophil activation involved in immune response);GO:0002673(regulation of acute inflammatory response);GO:0003677(DNA binding);GO:0004518(nuclease activity);GO:0004519(endonuclease activity);GO:0004520(endodeoxyribonuclease activity);GO:0004530(deoxyribonuclease I activity);GO:0004536(deoxyribonuclease activity);GO:0005576(extracellu…	NA	K11995	EC:3.1.21.-	deoxyribonuclease 1-like 3 [Source:MGI Symbol;Acc:MGI:1314633]	protein_coding	NA	0.316729	0.744239	0.425574	-1.23252	9.51273e-07	1.14405e-05	down	yes
ENSMUSG00000040812	Agbl2	78383;78387;78388;78389;78384;78386	ENSMUST00000170320;ENSMUST00000037206;ENSMUST00000149037;ENSMUST00000111481;ENSMUST00000051831;ENSMUST00000037219	GO:0004180(carboxypeptidase activity);GO:0004181(metallocarboxypeptidase activity);GO:0005737(cytoplasm);GO:0005814(centriole);GO:0005829(cytosol);GO:0005856(cytoskeleton);GO:0006508(proteolysis);GO:0008233(peptidase activity);GO:0008237(metallopeptidase activity);GO:0008270(zinc ion binding);GO:0016787(hydrolase activity);GO:0035610(protein side chain deglutamylation);GO:0036064(ciliary basal bo…	NA	NA	NA	ATP/GTP binding protein-like 2 [Source:MGI Symbol;Acc:MGI:2443254]	protein_coding;processed_transcript;nonsense_mediated_decay	NA	1.37352	3.22639	0.425713	-1.23205	4.28694e-09	8.72962e-08	down	yes
ENSMUSG00000066113	Adamtsl1	93520;93525;93516;93519;93528;93523	ENSMUST00000107178;ENSMUST00000126654;ENSMUST00000147066;ENSMUST00000130474;ENSMUST00000107177;ENSMUST00000120678	GO:0004222(metalloendopeptidase activity);GO:0005576(extracellular region);GO:0006508(proteolysis);GO:0008233(peptidase activity);GO:0030198(extracellular matrix organization);GO:0031012(extracellular matrix);GO:0062023(collagen-containing extracellular matrix);GO:0062023(collagen-containing extracellular matrix)	NA	NA	NA	ADAMTS-like 1 [Source:MGI Symbol;Acc:MGI:1924989]	protein_coding;retained_intron;processed_transcript	R_MMU_5173105(O_linked_glycosylation);R_MMU_597592(Post_translational_protein_modification);R_MMU_392499(Metabolism_of_proteins);R_MMU_5173214(O_glycosylation_of_TSR_domain_containing_proteins)	0.143738	0.337625	0.425732	-1.23198	6.81749e-07	8.63785e-06	down	yes
ENSMUSG00000023931	Efhb	63425;63426	ENSMUST00000024725;ENSMUST00000233544	GO:0005509(calcium ion binding);GO:0005575(cellular_component);GO:0005737(cytoplasm);GO:0032091(negative regulation of protein binding);GO:0046872(metal ion binding);GO:0061891(calcium ion sensor activity);GO:0070884(regulation of calcineurin-NFAT signaling cascade);GO:2001256(regulation of store-operated calcium entry);GO:2001256(regulation of store-operated calcium entry)	NA	NA	NA	EF hand domain family, member B [Source:MGI Symbol;Acc:MGI:3045296]	protein_coding;nonsense_mediated_decay	NA	0.733943	1.72378	0.425776	-1.23183	7.48552e-08	1.16415e-06	down	yes
ENSMUSG00000094075	Ighv1-80	36605	ENSMUST00000103547	GO:0003823(antigen binding);GO:0006910(phagocytosis, recognition);GO:0006911(phagocytosis, engulfment);GO:0006958(complement activation, classical pathway);GO:0009897(external side of plasma membrane);GO:0034987(immunoglobulin receptor binding);GO:0042571(immunoglobulin complex, circulating);GO:0042742(defense response to bacterium);GO:0045087(innate immune response);GO:0050853(B cell receptor si…	NA	NA	NA	immunoglobulin heavy variable 1-80 [Source:MGI Symbol;Acc:MGI:4439738]	IG_V_gene	R_MMU_2871809(FCERI_mediated_Ca+2_mobilization);R_MMU_977606(Regulation_of_Complement_cascade);R_MMU_5653656(Vesicle_mediated_transport);R_MMU_2029481(FCGR_activation);R_MMU_2029480(Fcgamma_receptor_(FCGR)_dependent_phagocytosis);R_MMU_983705(Signaling_by_the_B_Cell_Receptor_(BCR));R_MMU_109582(Hemostasis);R_MMU_173623(Classical_antibody_mediated_complement_activation);R_MMU_166663(Initial_trigge…	8.50036	19.9128	0.42688	-1.2281	7.96672e-08	1.23174e-06	down	yes
ENSMUSG00000074221	Zfp568	118681;118678;118682;118680	ENSMUST00000146074;ENSMUST00000148442;ENSMUST00000074322;ENSMUST00000209185	GO:0000122(negative regulation of transcription by RNA polymerase II);GO:0000976(transcription regulatory region sequence-specific DNA binding);GO:0001222(transcription corepressor binding);GO:0001701(in utero embryonic development);GO:0003676(nucleic acid binding);GO:0003677(DNA binding);GO:0005515(protein binding);GO:0005634(nucleus);GO:0006355(regulation of transcription, DNA-templated);GO:000…	05168(Herpes simplex virus 1 infection);05168(Herpes simplex virus 1 infection)	K09228	NA	zinc finger protein 568 [Source:MGI Symbol;Acc:MGI:2142347]	protein_coding;retained_intron	NA	0.761168	1.78299	0.426906	-1.22801	1.23718e-08	2.26098e-07	down	yes
ENSMUSG00000104445	Rhbg	86612	ENSMUST00000171887	GO:0005886(plasma membrane);GO:0005887(integral component of plasma membrane);GO:0008519(ammonium transmembrane transporter activity);GO:0014731(spectrin-associated cytoskeleton);GO:0015696(ammonium transport);GO:0016020(membrane);GO:0016021(integral component of membrane);GO:0016323(basolateral plasma membrane);GO:0030506(ankyrin binding);GO:0030659(cytoplasmic vesicle membrane);GO:0031410(cytop…	NA	K06580	NA	Rhesus blood group-associated B glycoprotein [Source:MGI Symbol;Acc:MGI:1927379]	protein_coding	R_MMU_444411(Rhesus_glycoproteins_mediate_ammonium_transport.);R_MMU_425407(SLC_mediated_transmembrane_transport);R_MMU_382551(Transport_of_small_molecules);R_MMU_425366(Transport_of_bile_salts_and_organic_acids,_metal_ions_and_amine_compounds)	0.849617	1.98579	0.427849	-1.22483	1.20034e-06	1.4042e-05	down	yes
ENSMUSG00000061132	Blnk	71810;71811	ENSMUST00000054769;ENSMUST00000134568	GO:0005515(protein binding);GO:0005737(cytoplasm);GO:0005829(cytosol);GO:0005886(plasma membrane);GO:0007169(transmembrane receptor protein tyrosine kinase signaling pathway);GO:0016020(membrane);GO:0019899(enzyme binding);GO:0035556(intracellular signal transduction);GO:0035591(signaling adaptor activity);GO:0036464(cytoplasmic ribonucleoprotein granule);GO:0042113(B cell activation);GO:0042169(…	04064(NF-kappa B signaling pathway);04380(Osteoclast differentiation);04662(B cell receptor signaling pathway);05169(Epstein-Barr virus infection);05340(Primary immunodeficiency);05340(Primary immunodeficiency)	K07371	NA	B cell linker [Source:MGI Symbol;Acc:MGI:96878]	protein_coding;retained_intron	R_MMU_983705(Signaling_by_the_B_Cell_Receptor_(BCR));R_MMU_168256(Immune_System);R_MMU_1280218(Adaptive_Immune_System);R_MMU_983695(Antigen_activates_B_Cell_Receptor_(BCR)_leading_to_generation_of_second_messengers)	3.122	7.29506	0.42796	-1.22445	1.82286e-09	3.96109e-08	down	yes
ENSMUSG00000073405	H2-T-ps	62271	ENSMUST00000172538	NA	04144(Endocytosis);04145(Phagosome);04218(Cellular senescence);04514(Cell adhesion molecules (CAMs));04612(Antigen processing and presentation);04650(Natural killer cell mediated cytotoxicity);04940(Type I diabetes mellitus);05163(Human cytomegalovirus infection);05165(Human papillomavirus infection);05166(Human T-cell leukemia virus 1 infection);05167(Kaposi sarcoma-associated herpesvirus infect…	K06751	NA	histocompatibility 2, T region locus, pseudogene [Source:MGI Symbol;Acc:MGI:2442805]	unprocessed_pseudogene	NA	0.918331	2.14237	0.428653	-1.22212	1.63934e-05	0.000142025	down	yes
ENSMUSG00000006235	Epor	135409	ENSMUST00000006397	GO:0003007(heart morphogenesis);GO:0004888(transmembrane signaling receptor activity);GO:0004896(cytokine receptor activity);GO:0004900(erythropoietin receptor activity);GO:0005515(protein binding);GO:0005576(extracellular region);GO:0005737(cytoplasm);GO:0005886(plasma membrane);GO:0007165(signal transduction);GO:0007204(positive regulation of cytosolic calcium ion concentration);GO:0007420(brai…	04060(Cytokine-cytokine receptor interaction);04151(PI3K-Akt signaling pathway);04630(Jak-STAT signaling pathway);04640(Hematopoietic cell lineage);05200(Pathways in cancer)	K05079	NA	erythropoietin receptor [Source:MGI Symbol;Acc:MGI:95408]	protein_coding	R_MMU_9027284(Erythropoietin_activates_RAS);R_MMU_9006335(Signaling_by_Erythropoietin);R_MMU_9027276(Erythropoietin_activates_Phosphoinositide_3_kinase_(PI3K));R_MMU_162582(Signal_Transduction)	0.487237	1.13659	0.428685	-1.22201	1.66009e-05	0.000143588	down	yes
ENSMUSG00000033282	Rpgrip1l	132250;132256;132255;132258	ENSMUST00000047783;ENSMUST00000211185;ENSMUST00000136198;ENSMUST00000209564	GO:0001701(in utero embryonic development);GO:0001736(establishment of planar polarity);GO:0001822(kidney development);GO:0001889(liver development);GO:0005515(protein binding);GO:0005654(nucleoplasm);GO:0005737(cytoplasm);GO:0005813(centrosome);GO:0005815(microtubule organizing center);GO:0005829(cytosol);GO:0005856(cytoskeleton);GO:0005879(axonemal microtubule);GO:0005886(plasma membrane);GO:00…	NA	K16550	NA	Rpgrip1-like [Source:MGI Symbol;Acc:MGI:1920563]	protein_coding;retained_intron	R_MMU_5358351(Signaling_by_Hedgehog);R_MMU_5617833(Cilium_Assembly);R_MMU_5620912(Anchoring_of_the_basal_body_to_the_plasma_membrane);R_MMU_5610787(Hedgehog_'off'_state);R_MMU_1852241(Organelle_biogenesis_and_maintenance);R_MMU_162582(Signal_Transduction)	0.707158	1.64944	0.428726	-1.22187	4.5884e-09	9.28391e-08	down	yes
ENSMUSG00000078234	Klhdc7a	97151	ENSMUST00000105031	GO:0005515(protein binding);GO:0016020(membrane);GO:0016021(integral component of membrane)	NA	NA	NA	kelch domain containing 7A [Source:MGI Symbol;Acc:MGI:2444612]	protein_coding	NA	2.06081	4.80366	0.429009	-1.22092	2.25721e-09	4.81913e-08	down	yes
ENSMUSG00000006585	Cdt1	134000;134002;134004;134001;134003	ENSMUST00000006760;ENSMUST00000212967;ENSMUST00000212821;ENSMUST00000212201;ENSMUST00000212053	GO:0000076(DNA replication checkpoint);GO:0000278(mitotic cell cycle);GO:0000775(chromosome, centromeric region);GO:0000776(kinetochore);GO:0000777(condensed chromosome kinetochore);GO:0003677(DNA binding);GO:0003682(chromatin binding);GO:0005515(protein binding);GO:0005634(nucleus);GO:0005654(nucleoplasm);GO:0005694(chromosome);GO:0006260(DNA replication);GO:0007049(cell cycle);GO:0007059(chromo…	NA	K10727	NA	chromatin licensing and DNA replication factor 1 [Source:MGI Symbol;Acc:MGI:1914427]	protein_coding;retained_intron;processed_transcript	R_MMU_68949(Orc1_removal_from_chromatin);R_MMU_69206(G1/S_Transition);R_MMU_69239(Synthesis_of_DNA);R_MMU_69242(S_Phase);R_MMU_1640170(Cell_Cycle);R_MMU_69278(Cell_Cycle,_Mitotic);R_MMU_453279(Mitotic_G1_phase_and_G1/S_transition);R_MMU_69052(Switching_of_origins_to_a_post_replicative_state);R_MMU_68867(Assembly_of_the_pre_replicative_complex);R_MMU_68827(CDT1_association_with_the_CDC6:ORC:origin…	1.02193	2.3782	0.429706	-1.21858	1.20417e-07	1.79697e-06	down	yes
ENSMUSG00000025068	Gsto1	72459;72462;72457;72461;72460	ENSMUST00000237472;ENSMUST00000143694;ENSMUST00000026050;ENSMUST00000236902;ENSMUST00000130157	GO:0004364(glutathione transferase activity);GO:0005515(protein binding);GO:0005604(basement membrane);GO:0005654(nucleoplasm);GO:0005737(cytoplasm);GO:0005829(cytosol);GO:0010880(regulation of release of sequestered calcium ion into cytosol by sarcoplasmic reticulum);GO:0016491(oxidoreductase activity);GO:0016740(transferase activity);GO:0019852(L-ascorbic acid metabolic process);GO:0019853(L-as…	00480(Glutathione metabolism);00980(Metabolism of xenobiotics by cytochrome P450);00982(Drug metabolism - cytochrome P450);00983(Drug metabolism - other enzymes);01524(Platinum drug resistance);05200(Pathways in cancer);05204(Chemical carcinogenesis);05225(Hepatocellular carcinoma);05418(Fluid shear stress and atherosclerosis);05418(Fluid shear stress and atherosclerosis)	K00799	EC:2.5.1.18	glutathione S-transferase omega 1 [Source:MGI Symbol;Acc:MGI:1342273]	nonsense_mediated_decay;retained_intron;protein_coding;processed_transcript	R_MMU_196836(Vitamin_C_(ascorbate)_metabolism);R_MMU_196854(Metabolism_of_vitamins_and_cofactors);R_MMU_1430728(Metabolism);R_MMU_156590(Glutathione_conjugation);R_MMU_156580(Phase_II_Conjugation_of_compounds);R_MMU_156581(Methylation);R_MMU_196849(Metabolism_of_water_soluble_vitamins_and_cofactors);R_MMU_211859(Biological_oxidations)	29.1466	67.8216	0.429753	-1.21842	1.16409e-09	2.59719e-08	down	yes
ENSMUSG00000005237	Dnah2	25926;25925;25931;25928;25930	ENSMUST00000108659;ENSMUST00000035539;ENSMUST00000208777;ENSMUST00000151811;ENSMUST00000149991	GO:0000166(nucleotide binding);GO:0003774(motor activity);GO:0003777(microtubule motor activity);GO:0005524(ATP binding);GO:0005737(cytoplasm);GO:0005856(cytoskeleton);GO:0005874(microtubule);GO:0005929(cilium);GO:0005930(axoneme);GO:0007018(microtubule-based movement);GO:0008569(ATP-dependent microtubule motor activity, minus-end-directed);GO:0030286(dynein complex);GO:0031514(motile cilium);GO:…	05016(Huntington disease);05016(Huntington disease)	K10408	NA	dynein, axonemal, heavy chain 2 [Source:MGI Symbol;Acc:MGI:107731]	protein_coding;processed_transcript	NA	0.811115	1.88666	0.429921	-1.21786	3.58083e-09	7.34834e-08	down	yes
ENSMUSG00000074800	Gm4149	40807	ENSMUST00000099371	NA	NA	NA	NA	predicted pseudogene 4149 [Source:MGI Symbol;Acc:MGI:3782325]	processed_pseudogene	NA	17.0888	39.7442	0.42997	-1.21769	2.8907e-08	4.84726e-07	down	yes
ENSMUSG00000071537	Klrg2	108942;108943	ENSMUST00000202245;ENSMUST00000096030	GO:0016020(membrane);GO:0016021(integral component of membrane);GO:0016021(integral component of membrane)	NA	NA	NA	killer cell lectin-like receptor subfamily G, member 2 [Source:MGI Symbol;Acc:MGI:1921503]	nonsense_mediated_decay;protein_coding	NA	0.476585	1.10834	0.43	-1.21759	1.68436e-06	1.90035e-05	down	yes
ENSMUSG00000041617	Ccdc74a	54388;54394;54393;54386;54389	ENSMUST00000056962;ENSMUST00000182526;ENSMUST00000182344;ENSMUST00000182822;ENSMUST00000183101	GO:0003674(molecular_function);GO:0005575(cellular_component);GO:0008150(biological_process);GO:0008150(biological_process)	NA	NA	NA	coiled-coil domain containing 74A [Source:MGI Symbol;Acc:MGI:1919565]	protein_coding;retained_intron	NA	0.924347	2.14917	0.430096	-1.21727	4.34127e-07	5.70552e-06	down	yes
ENSMUSG00000032278	Paqr5	138178;138177	ENSMUST00000034817;ENSMUST00000135050	GO:0005496(steroid binding);GO:0005886(plasma membrane);GO:0007275(multicellular organism development);GO:0008289(lipid binding);GO:0016020(membrane);GO:0016021(integral component of membrane);GO:0030154(cell differentiation);GO:0038023(signaling receptor activity);GO:0048477(oogenesis);GO:0048477(oogenesis)	NA	NA	NA	progestin and adipoQ receptor family member V [Source:MGI Symbol;Acc:MGI:1921340]	protein_coding;processed_transcript	NA	0.358732	0.833873	0.4302	-1.21692	3.39669e-06	3.53322e-05	down	yes
ENSMUSG00000030030	1700003E16Rik	111306;111305	ENSMUST00000203203;ENSMUST00000032106	GO:0003674(molecular_function);GO:0005575(cellular_component);GO:0008150(biological_process);GO:0008150(biological_process)	NA	NA	NA	RIKEN cDNA 1700003E16 gene [Source:MGI Symbol;Acc:MGI:1919087]	protein_coding	NA	1.87365	4.35456	0.430274	-1.21667	3.99094e-08	6.5132e-07	down	yes
ENSMUSG00000022420	Dnal4	51200;51199;51202;51201	ENSMUST00000023055;ENSMUST00000069877;ENSMUST00000162713;ENSMUST00000230645	GO:0003774(motor activity);GO:0005737(cytoplasm);GO:0005856(cytoskeleton);GO:0005874(microtubule);GO:0005929(cilium);GO:0007017(microtubule-based process);GO:0030286(dynein complex);GO:0042802(identical protein binding);GO:0042995(cell projection);GO:0045505(dynein intermediate chain binding);GO:0051959(dynein light intermediate chain binding);GO:2000582(positive regulation of ATP-dependent micro…	05016(Huntington disease);05016(Huntington disease)	K10412	NA	dynein, axonemal, light chain 4 [Source:MGI Symbol;Acc:MGI:1859217]	protein_coding	R_MMU_177504(Retrograde_neurotrophin_signalling);R_MMU_166520(Signaling_by_NTRKs);R_MMU_187037(Signaling_by_NTRK1_(TRKA));R_MMU_9006934(Signaling_by_Receptor_Tyrosine_Kinases);R_MMU_162582(Signal_Transduction)	3.86634	8.98435	0.430342	-1.21645	6.46657e-09	1.26019e-07	down	yes
ENSMUSG00000002633	Shh	99659	ENSMUST00000002708	GO:0000122(negative regulation of transcription by RNA polymerase II);GO:0001525(angiogenesis);GO:0001569(branching involved in blood vessel morphogenesis);GO:0001570(vasculogenesis);GO:0001656(metanephros development);GO:0001658(branching involved in ureteric bud morphogenesis);GO:0001708(cell fate specification);GO:0001755(neural crest cell migration);GO:0001822(kidney development);GO:0001841(n…	04340(Hedgehog signaling pathway);04360(Axon guidance);05200(Pathways in cancer);05205(Proteoglycans in cancer);05217(Basal cell carcinoma);05226(Gastric cancer)	K11988	NA	sonic hedgehog [Source:MGI Symbol;Acc:MGI:98297]	protein_coding	R_MMU_5362798(Release_of_Hh_Np_from_the_secreting_cell);R_MMU_5358351(Signaling_by_Hedgehog);R_MMU_5632681(Ligand_receptor_interactions);R_MMU_5358346(Hedgehog_ligand_biogenesis);R_MMU_5635838(Activation_of_SMO);R_MMU_162582(Signal_Transduction);R_MMU_5632684(Hedgehog_'on'_state)	5.74777	13.3544	0.430404	-1.21624	2.51763e-09	5.30375e-08	down	yes
ENSMUSG00000034586	Hid1	30284;30283;30288;30286;30285	ENSMUST00000106542;ENSMUST00000044152;ENSMUST00000145316;ENSMUST00000153447;ENSMUST00000146256	GO:0000138(Golgi trans cisterna);GO:0000139(Golgi membrane);GO:0003674(molecular_function);GO:0005737(cytoplasm);GO:0005794(Golgi apparatus);GO:0005797(Golgi medial cisterna);GO:0005829(cytosol);GO:0005881(cytoplasmic microtubule);GO:0016020(membrane);GO:0090498(extrinsic component of Golgi membrane);GO:0090498(extrinsic component of Golgi membrane)	NA	NA	NA	HID1 domain containing [Source:MGI Symbol;Acc:MGI:2445087]	protein_coding;processed_transcript	NA	3.99068	9.26995	0.430496	-1.21593	2.34691e-09	4.97714e-08	down	yes
ENSMUSG00000053398	Phgdh	88119;88121	ENSMUST00000065793;ENSMUST00000152106	GO:0004617(phosphoglycerate dehydrogenase activity);GO:0006520(cellular amino acid metabolic process);GO:0006541(glutamine metabolic process);GO:0006544(glycine metabolic process);GO:0006563(L-serine metabolic process);GO:0006564(L-serine biosynthetic process);GO:0006566(threonine metabolic process);GO:0008652(cellular amino acid biosynthetic process);GO:0009448(gamma-aminobutyric acid metabolic …	00260(Glycine, serine and threonine metabolism);00260(Glycine, serine and threonine metabolism)	K00058	1.1.1.399;EC:1.1.1.95	3-phosphoglycerate dehydrogenase [Source:MGI Symbol;Acc:MGI:1355330]	protein_coding;retained_intron	R_MMU_1430728(Metabolism);R_MMU_71291(Metabolism_of_amino_acids_and_derivatives);R_MMU_977347(Serine_biosynthesis)	2.7087	6.28988	0.430645	-1.21543	1.23522e-08	2.26e-07	down	yes
ENSMUSG00000076552	Igkv4-61	110661;110660	ENSMUST00000103353;ENSMUST00000199160	GO:0002377(immunoglobulin production);GO:0005615(extracellular space);GO:0006955(immune response);GO:0006955(immune response)	NA	NA	NA	immunoglobulin kappa chain variable 4-61 [Source:MGI Symbol;Acc:MGI:4439819]	IG_V_gene	NA	223.191	517.89	0.430962	-1.21437	1.17242e-09	2.61209e-08	down	yes
ENSMUSG00000024526	Cidea	67826	ENSMUST00000025404	GO:0001659(temperature homeostasis);GO:0005515(protein binding);GO:0005634(nucleus);GO:0005737(cytoplasm);GO:0005739(mitochondrion);GO:0005740(mitochondrial envelope);GO:0005811(lipid droplet);GO:0006629(lipid metabolic process);GO:0006915(apoptotic process);GO:0008219(cell death);GO:0010890(positive regulation of sequestering of triglyceride);GO:0019915(lipid storage);GO:0030512(negative regulat…	NA	NA	NA	cell death-inducing DNA fragmentation factor, alpha subunit-like effector A [Source:MGI Symbol;Acc:MGI:1270845]	protein_coding	R_MMU_8964572(Lipid_particle_organization);R_MMU_556833(Metabolism_of_lipids);R_MMU_1430728(Metabolism)	3.81473	8.84787	0.431146	-1.21375	4.26695e-08	6.9458e-07	down	yes
ENSMUSG00000030592	Ryr1	118504	ENSMUST00000179893	GO:0000166(nucleotide binding);GO:0001666(response to hypoxia);GO:0002020(protease binding);GO:0003151(outflow tract morphogenesis);GO:0005216(ion channel activity);GO:0005219(ryanodine-sensitive calcium-release channel activity);GO:0005245(voltage-gated calcium channel activity);GO:0005262(calcium channel activity);GO:0005509(calcium ion binding);GO:0005515(protein binding);GO:0005516(calmodulin…	04020(Calcium signaling pathway);04371(Apelin signaling pathway);04713(Circadian entrainment);04730(Long-term depression);04921(Oxytocin signaling pathway)	K04961	NA	ryanodine receptor 1, skeletal muscle [Source:MGI Symbol;Acc:MGI:99659]	protein_coding	R_MMU_382551(Transport_of_small_molecules);R_MMU_5576891(Cardiac_conduction);R_MMU_2672351(Stimuli_sensing_channels);R_MMU_5578775(Ion_homeostasis);R_MMU_397014(Muscle_contraction);R_MMU_983712(Ion_channel_transport)	0.0607324	0.140774	0.431416	-1.21285	5.05041e-06	5.01657e-05	down	yes
ENSMUSG00000097209	AU022754	51900	ENSMUST00000180441	NA	NA	NA	NA	expressed sequence AU022754 [Source:MGI Symbol;Acc:MGI:2146143]	antisense	NA	0.279404	0.647511	0.431505	-1.21255	4.88137e-05	0.000367156	down	yes
ENSMUSG00000036718	Micall2	106681;106683;106682	ENSMUST00000044642;ENSMUST00000165645;ENSMUST00000164584	GO:0001725(stress fiber);GO:0005515(protein binding);GO:0005737(cytoplasm);GO:0005768(endosome);GO:0005829(cytosol);GO:0005856(cytoskeleton);GO:0005886(plasma membrane);GO:0005911(cell-cell junction);GO:0005923(bicellular tight junction);GO:0016020(membrane);GO:0017137(Rab GTPase binding);GO:0030041(actin filament polymerization);GO:0030054(cell junction);GO:0031005(filamin binding);GO:0031175(ne…	04530(Tight junction);04530(Tight junction)	K21068	NA	MICAL-like 2 [Source:MGI Symbol;Acc:MGI:2444818]	protein_coding;nonsense_mediated_decay;retained_intron	NA	0.82532	1.9125	0.431539	-1.21244	9.18258e-08	1.39926e-06	down	yes
[truncated: 1,263 more rows]
